# Supplementary material
Source: PubMed Central journal article supplement (PMC5232357)

## Table of Contents

|                                                                                                                                                                                               |     |
|-----------------------------------------------------------------------------------------------------------------------------------------------------------------------------------------------|-----|
| General Experimental .....                                                                                                                                                                    | S8  |
| Handling of [Ni] Catalysts.....                                                                                                                                                               | S8  |
| General Procedure for the Synthesis of TCNHPI Esters (General Procedure A)<br>.....                                                                                                           | S9  |
| Optimization Details .....                                                                                                                                                                    | S10 |
| Additional Optimization Details based on Various Substrates.....                                                                                                                              | S12 |
| General Procedure for the Ni-Catalyzed Cross-Coupling of Alkyl Redox-Active<br>Esters and Aryl Boronic Acids (General Procedure B) .....                                                      | S13 |
| Part I. Preparation of NiCl <sub>2</sub> •6H <sub>2</sub> O/ligand Stock Solution (0.05 M in DMF)<br>.....                                                                                    | S13 |
| Part II. Ni-Catalyzed Cross-Coupling Reaction .....                                                                                                                                           | S13 |
| Graphical Supporting Information for the Ni-Catalyzed Cross-Coupling of<br>Redox-Active Esters and Boronic Acids: <i>tert</i> -Butyl 4-(4-acetylphenyl)<br>piperidine-1-carboxylate (22)..... | S15 |
| Part I. Preparation of NiCl <sub>2</sub> •6H <sub>2</sub> O/ <i>di-t</i> Bubipy Stock Solution (0.05 M in<br>DMF).....                                                                        | S15 |
| Part II. Ni-Catalyzed Cross-Coupling Reaction .....                                                                                                                                           | S17 |
| Zero-Precaution Setup.....                                                                                                                                                                    | S23 |
| Water Addition experiment.....                                                                                                                                                                | S24 |
| General Procedure for the Gram-Scale Ni-Catalyzed Cross-Coupling Reaction:<br><i>tert</i> -Butyl 4-(4-bromophenyl)piperidine-1-carboxylate (4) .....                                          | S25 |
| Part I. Preparation of NiCl <sub>2</sub> •6H <sub>2</sub> O/ <i>di-t</i> Bubipy Stock Solution (0.05 M in<br>DMF).....                                                                        | S25 |
| Part II. Ni-Catalyzed Cross-Coupling Reaction .....                                                                                                                                           | S25 |
| Graphical Supporting Information for the Gram-Scale Ni-Catalyzed<br>Cross-Coupling Reaction: <i>tert</i> -Butyl 4-(4-bromophenyl)piperidine-1-carboxylate<br>(4).....                         | S26 |
| Part I. Preparation of NiCl <sub>2</sub> •6H <sub>2</sub> O/ <i>di-t</i> Bubipy Stock Solution (0.05 M in                                                                                     |     |

|                                                                                                                                                                                                            |     |
|------------------------------------------------------------------------------------------------------------------------------------------------------------------------------------------------------------|-----|
| DMF).....                                                                                                                                                                                                  | S26 |
| Part II. Ni-Catalyzed Cross-Coupling Reaction .....                                                                                                                                                        | S28 |
| General Procedure for Cross-Coupling of Alkyl Redox-Active Esters and Aryl Boronic Acids with 10 mol% Nickel/ligand (General Procedure C).....                                                             | S33 |
| Part I. Preparation of NiCl <sub>2</sub> •6H <sub>2</sub> O/di- <i>t</i> Bubipy (L1) Stock Solution (0.025 M in DMF).....                                                                                  | S33 |
| Part II. Ni-Catalyzed Cross-Coupling Reaction .....                                                                                                                                                        | S33 |
| Examples of Cross-Coupling with 10 mol% Nickel.....                                                                                                                                                        | S34 |
| General Procedure for <i>in situ</i> Ni-Catalyzed Cross-Coupling of Alkyl Carboxylic Acids and Aryl Boronic Acids (General Procedure D) .....                                                              | S35 |
| Part I. Preparation of NiCl <sub>2</sub> •6H <sub>2</sub> O/bathophenanthroline (L4) Stock Solution (0.05 M in DMF).....                                                                                   | S35 |
| Part II. Ni-Catalyzed Cross-Coupling Reaction .....                                                                                                                                                        | S35 |
| Graphical Supporting Information for <i>in situ</i> Ni-Catalyzed Cross-Coupling of Alkyl Carboxylic Acids and Aryl Boronic Acids: <i>tert</i> -Butyl 4-(4-acetylphenyl) piperidine-1-carboxylate (22)..... | S37 |
| Part I. Preparation of NiCl <sub>2</sub> •6H <sub>2</sub> O/bathophenanthroline Stock Solution (0.05 M in DMF).....                                                                                        | S37 |
| Part II. Ni-Catalyzed Cross-Coupling Reaction .....                                                                                                                                                        | S38 |
| Examples of <i>In Situ</i> Cross-Coupling of Alkyl Carboxylic Acids and Aryl Boronic Acids.....                                                                                                            | S41 |
| Troubleshooting: Frequently Asked Questions .....                                                                                                                                                          | S42 |
| Part I. Redox-Active Ester Synthesis .....                                                                                                                                                                 | S42 |
| Part II. Nickel-Catalyzed Cross-Coupling.....                                                                                                                                                              | S42 |
| Experimental Procedures and Characterization Data for Redox-Active Esters .....                                                                                                                            | S48 |
| Compound S1 .....                                                                                                                                                                                          | S48 |
| Compound S2 .....                                                                                                                                                                                          | S48 |
| Compound (±)-S3 .....                                                                                                                                                                                      | S49 |
| Compound S4 .....                                                                                                                                                                                          | S50 |

|                                                                                            |            |
|--------------------------------------------------------------------------------------------|------------|
| Compound S5 .....                                                                          | S50        |
| Compound S6 .....                                                                          | S51        |
| <b>Experimental Procedures and Characterization Data for Cross-Coupling Products .....</b> | <b>S52</b> |
| Compound 3 .....                                                                           | S52        |
| Compound 4 .....                                                                           | S52        |
| Compound 5 .....                                                                           | S53        |
| Compound 6 .....                                                                           | S53        |
| Compound 7 .....                                                                           | S54        |
| Compound 8 .....                                                                           | S54        |
| Compound 9 .....                                                                           | S55        |
| Compound 10 .....                                                                          | S56        |
| Compound 11.....                                                                           | S56        |
| Compound 12 .....                                                                          | S57        |
| Compound 13 .....                                                                          | S57        |
| Compound 14 .....                                                                          | S58        |
| Compound 15 .....                                                                          | S59        |
| Compound 16 .....                                                                          | S59        |
| Compound 17 .....                                                                          | S61        |
| Compound 18 .....                                                                          | S62        |
| Compound 19 .....                                                                          | S62        |
| Compound 20 .....                                                                          | S63        |
| Compound 21 .....                                                                          | S64        |
| Compound 22 .....                                                                          | S64        |
| Compound 23 .....                                                                          | S65        |
| Compound 24 .....                                                                          | S65        |
| Compound 25 .....                                                                          | S66        |
| Compound 26 .....                                                                          | S66        |
| Compound 27 .....                                                                          | S67        |
| Compound 28 .....                                                                          | S68        |

|                                                   |     |
|---------------------------------------------------|-----|
| Compound 29 .....                                 | S68 |
| Compound 30 .....                                 | S69 |
| Compound 31 .....                                 | S69 |
| Compound 32 .....                                 | S70 |
| Compound 33 .....                                 | S71 |
| Compound 34 .....                                 | S71 |
| Compound 35 .....                                 | S72 |
| Compound 36 .....                                 | S72 |
| Compound 37 .....                                 | S73 |
| Compound 38 .....                                 | S74 |
| Compound 39 .....                                 | S74 |
| Compound 40 .....                                 | S75 |
| Compound 41 .....                                 | S75 |
| Compound 44 .....                                 | S76 |
| X-Ray Crystallographic Data for Compound 17 ..... | S77 |
| References .....                                  | S79 |
| Spectra for Compounds.....                        | S80 |
| Compound S1 <sup>1</sup> H NMR .....              | S80 |
| Compound S1 <sup>13</sup> C NMR .....             | S81 |
| Compound S2 <sup>1</sup> H NMR .....              | S82 |
| Compound S2 <sup>13</sup> C NMR .....             | S83 |
| Compound (±)-S3 <sup>1</sup> H NMR.....           | S84 |
| Compound (±)-S3 <sup>13</sup> C NMR.....          | S85 |
| Compound S4 <sup>1</sup> H NMR .....              | S86 |
| Compound S4 <sup>13</sup> C NMR.....              | S87 |
| Compound S5 <sup>1</sup> H NMR .....              | S88 |
| Compound S5 <sup>13</sup> C NMR.....              | S89 |
| Compound S6 <sup>1</sup> H NMR .....              | S90 |
| Compound S6 <sup>13</sup> C NMR .....             | S91 |
| Compound 3 <sup>1</sup> H NMR .....               | S92 |

|                                       |      |
|---------------------------------------|------|
| Compound 3 <sup>13</sup> C NMR .....  | S93  |
| Compound 3 <sup>19</sup> F NMR.....   | S94  |
| Compound 4 <sup>1</sup> H NMR .....   | S95  |
| Compound 4 <sup>13</sup> C NMR .....  | S96  |
| Compound 5 <sup>1</sup> H NMR .....   | S97  |
| Compound 5 <sup>13</sup> C NMR .....  | S98  |
| Compound 6 <sup>1</sup> H NMR .....   | S99  |
| Compound 6 <sup>13</sup> C NMR .....  | S100 |
| Compound 7 <sup>1</sup> H NMR .....   | S101 |
| Compound 7 <sup>13</sup> C NMR .....  | S102 |
| Compound 8 <sup>1</sup> H NMR .....   | S103 |
| Compound 8 <sup>13</sup> C NMR .....  | S104 |
| Compound 9 <sup>1</sup> H NMR .....   | S105 |
| Compound 9 <sup>13</sup> C NMR .....  | S106 |
| Compound 10 <sup>1</sup> H NMR .....  | S107 |
| Compound 10 <sup>13</sup> C NMR ..... | S108 |
| Compound 11 <sup>1</sup> H NMR.....   | S109 |
| Compound 11 <sup>13</sup> C NMR.....  | S110 |
| Compound 12 <sup>1</sup> H NMR .....  | S111 |
| Compound 12 <sup>13</sup> C NMR ..... | S112 |
| Compound 13 <sup>1</sup> H NMR .....  | S113 |
| Compound 13 <sup>13</sup> C NMR ..... | S114 |
| Compound 14 <sup>1</sup> H NMR .....  | S115 |
| Compound 14 <sup>13</sup> C NMR ..... | S116 |
| Compound 15 <sup>1</sup> H NMR .....  | S117 |
| Compound 15 <sup>13</sup> C NMR ..... | S118 |
| Compound 16 <sup>1</sup> H NMR .....  | S119 |
| Compound 16 <sup>13</sup> C NMR ..... | S120 |
| Compound 17 <sup>1</sup> H NMR .....  | S121 |
| Compound 17 <sup>13</sup> C NMR ..... | S122 |

|                                       |      |
|---------------------------------------|------|
| Compound 18 $^1\text{H}$ NMR .....    | S123 |
| Compound 18 $^{13}\text{C}$ NMR ..... | S124 |
| Compound 18 $^{19}\text{F}$ NMR.....  | S125 |
| Compound 19 $^1\text{H}$ NMR .....    | S126 |
| Compound 19 $^{13}\text{C}$ NMR ..... | S127 |
| Compound 20 $^1\text{H}$ NMR .....    | S128 |
| Compound 20 $^{13}\text{C}$ NMR ..... | S129 |
| Compound 21 $^1\text{H}$ NMR .....    | S130 |
| Compound 21 $^{13}\text{C}$ NMR ..... | S131 |
| Compound 22 $^1\text{H}$ NMR .....    | S132 |
| Compound 22 $^{13}\text{C}$ NMR ..... | S133 |
| Compound 23 $^1\text{H}$ NMR .....    | S134 |
| Compound 23 $^{13}\text{C}$ NMR ..... | S135 |
| Compound 24 $^1\text{H}$ NMR .....    | S136 |
| Compound 24 $^{13}\text{C}$ NMR ..... | S137 |
| Compound 25 $^1\text{H}$ NMR .....    | S138 |
| Compound 25 $^{13}\text{C}$ NMR ..... | S139 |
| Compound 26 $^1\text{H}$ NMR .....    | S140 |
| Compound 26 $^{13}\text{C}$ NMR ..... | S141 |
| Compound 26 $^{19}\text{F}$ NMR.....  | S142 |
| Compound 27 $^1\text{H}$ NMR .....    | S143 |
| Compound 27 $^{13}\text{C}$ NMR ..... | S144 |
| Compound 28 $^1\text{H}$ NMR .....    | S145 |
| Compound 28 $^{13}\text{C}$ NMR ..... | S146 |
| Compound 28 HSQC .....                | S147 |
| Compound 28 HMBC.....                 | S148 |
| Compound 29 $^1\text{H}$ NMR .....    | S149 |
| Compound 29 $^{13}\text{C}$ NMR ..... | S150 |
| Compound 30 $^1\text{H}$ NMR .....    | S151 |
| Compound 30 $^{13}\text{C}$ NMR ..... | S152 |

|                                       |      |
|---------------------------------------|------|
| Compound 31 $^1\text{H}$ NMR .....    | S153 |
| Compound 31 $^{13}\text{C}$ NMR ..... | S154 |
| Compound 31 $^{19}\text{F}$ NMR.....  | S155 |
| Compound 32 $^1\text{H}$ NMR .....    | S156 |
| Compound 32 $^{13}\text{C}$ NMR ..... | S157 |
| Compound 33 $^1\text{H}$ NMR .....    | S158 |
| Compound 33 $^{13}\text{C}$ NMR ..... | S159 |
| Compound 34 $^1\text{H}$ NMR .....    | S160 |
| Compound 34 $^{13}\text{C}$ NMR ..... | S161 |
| Compound 35 $^1\text{H}$ NMR .....    | S162 |
| Compound 35 $^{13}\text{C}$ NMR ..... | S163 |
| Compound 35 HSQC .....                | S164 |
| Compound 36 $^1\text{H}$ NMR .....    | S165 |
| Compound 36 $^{13}\text{C}$ NMR ..... | S166 |
| Compound 36 $^{19}\text{F}$ NMR.....  | S167 |
| Compound 37 $^1\text{H}$ NMR .....    | S168 |
| Compound 37 $^{13}\text{C}$ NMR ..... | S169 |
| Compound 38 $^1\text{H}$ NMR .....    | S170 |
| Compound 38 $^{13}\text{C}$ NMR ..... | S171 |
| Compound 39 $^1\text{H}$ NMR .....    | S172 |
| Compound 39 $^{13}\text{C}$ NMR ..... | S173 |
| Compound 40 $^1\text{H}$ NMR .....    | S174 |
| Compound 40 $^{13}\text{C}$ NMR ..... | S175 |
| Compound 41 $^1\text{H}$ NMR .....    | S176 |
| Compound 41 $^{13}\text{C}$ NMR ..... | S177 |
| Compound 44 $^1\text{H}$ NMR .....    | S178 |
| Compound 44 $^{13}\text{C}$ NMR ..... | S179 |

## General Experimental

Tetrahydrofuran (THF), *N,N*-dimethylformamide (DMF), and dichloromethane (CH<sub>2</sub>Cl<sub>2</sub>) were obtained by passing the previously degassed solvents through an activated alumina column. Extra dry 1,4-dioxane and DMF with molecular sieves were purchased from Acros (AcroSeal® bottles) and used directly. Et<sub>3</sub>N was purchased from Sigma-Aldrich (sealed bottles). DIC (*N,N'*-diisopropylcarbodiimide) was purchased from Oakwood. NiCl<sub>2</sub>•6H<sub>2</sub>O was purchased from Sigma-Aldrich. All the reagents were purchased at the highest commercial quality and used without further purification, unless otherwise stated. Yields refer to chromatographically and spectroscopically (<sup>1</sup>H NMR) homogeneous material, unless otherwise stated. Reactions were monitored by thin layer chromatography (TLC), GC/MS GC/FID or LC/MS. TLC was performed using 0.25 mm E. Merck silica plates (60F-254), using short-wave UV light as the visualizing agent, and phosphomolybdic acid or KMnO<sub>4</sub> and heat as developing agents. NMR spectra were recorded on Bruker DRX-600, DRX-500, and AMX-400 instruments and are calibrated using residual undeuterated solvent (CHCl<sub>3</sub> at 7.26 ppm <sup>1</sup>H NMR, 77.16 ppm <sup>13</sup>C NMR). The following abbreviations were used to explain multiplicities: s = singlet, d = doublet, t = triplet, q = quartet, m = multiplet, br = broad. Column chromatography was performed using E. Merck silica gel (60, particle size 0.043–0.063 mm), and preparative TLC was performed on Merck silica plates (60F-254). High-resolution mass spectra (HRMS) were recorded on an Agilent LC/MSD TOF mass spectrometer by electrospray ionization time of flight reflectron experiments. Melting points were recorded on a Fisher-Johns 12-144 melting point apparatus and are uncorrected. The UCSD small molecule X-ray facility collected and analyzed all X-ray diffraction data. Enantiomeric excesses (*ee*) were determined on an Agilent 1100 series HPLC system.

## Handling of [Ni] Catalysts

All Ni catalysts were handled open to air on the bench top, and the bottles were neither flame dried nor stored under inert atmosphere.



### General Procedure for the Synthesis of TCNHPI Esters (General Procedure A)

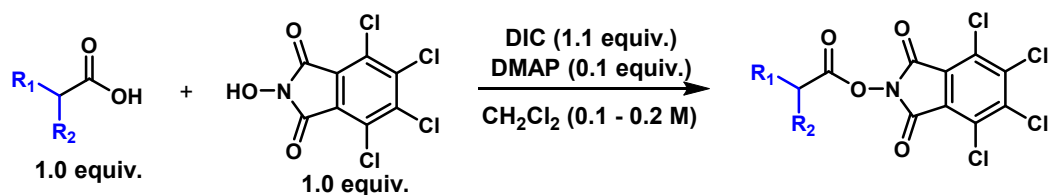

Esters were prepared according to the previously reported procedure.<sup>1,2</sup> In short, a round-bottom flask or culture tube was charged with (if solid) carboxylic acid (1.0 equiv), *N*-hydroxy-tetrachlorophthalimide, 1.0 equiv.) and DMAP (0.1 equiv.). Dichloromethane was added (0.1 – 0.2 M), and the mixture was stirred vigorously. Carboxylic acid (1.0 equiv.) was added via syringe (if liquid). DIC (1.1 equiv.) was then added dropwise via syringe, and the mixture was allowed to stir until the acid was consumed (determined by TLC). Typical reaction times were between 0.5 h and 12 h. The mixture was filtered (over Celite, SiO<sub>2</sub>, or through a fritted funnel) and rinsed with additional CH<sub>2</sub>Cl<sub>2</sub>/Et<sub>2</sub>O. The solvent was removed under reduced pressure, and purification by column chromatography (and recrystallization, if necessary) afforded corresponding TCNHPI redox-active ester.

For graphical supporting information regarding the synthesis of TCNHPI esters, please address to our previous paper<sup>1,2</sup> for full details.

## Optimization Details

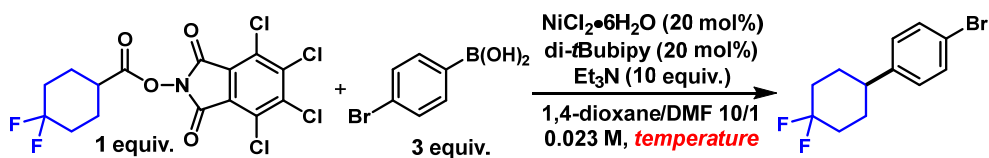

| Temperature  | Yield (%) <sup>a</sup> |
|--------------|------------------------|
| 55 °C        | 33                     |
| 65 °C        | 36                     |
| <b>75 °C</b> | <b>82</b>              |
| 85 °C        | 54                     |

<sup>a</sup>Yields determined by GC-FID with dodecane as internal standard

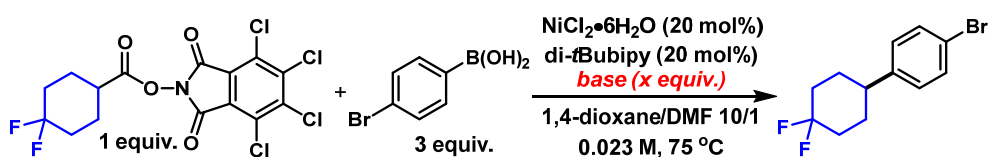

| Base                                                | Yield (%) <sup>a</sup> |
|-----------------------------------------------------|------------------------|
| No base                                             | 40                     |
| $\text{Et}_3\text{N}$ (3.5 equiv.)                  | 75                     |
| $\text{Et}_3\text{N}$ (6.5 equiv.)                  | 75                     |
| <b><math>\text{Et}_3\text{N}</math> (10 equiv.)</b> | <b>82</b>              |
| $i\text{Pr}_2\text{NEt}$ (10 equiv.)                | 68                     |
| $n\text{Bu}_3\text{N}$ (10 equiv.)                  | 43                     |
| $\text{K}_2\text{CO}_3$ (3.5 equiv.)                | 35                     |
| $\text{Cs}_2\text{CO}_3$ (3.5 equiv.)               | <5                     |
| $\text{K}_3\text{PO}_4$ (3.5 equiv.)                | <5                     |

<sup>a</sup>Yields determined by GC-FID with dodecane as internal standard

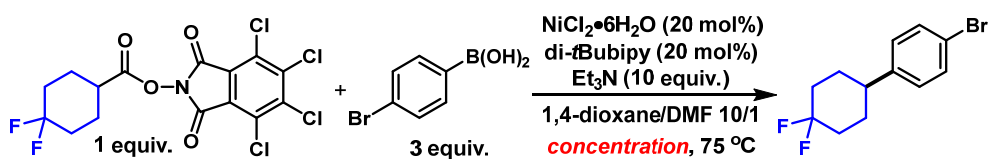

| Concentration  | Yield (%) <sup>a</sup> |
|----------------|------------------------|
| 0.091 M        | 6                      |
| 0.045 M        | 35                     |
| <b>0.023 M</b> | <b>82</b>              |
| 0.011 M        | 73                     |
| 0.009 M        | 63                     |

<sup>a</sup>Yields determined by GC-FID with dodecane as internal standard

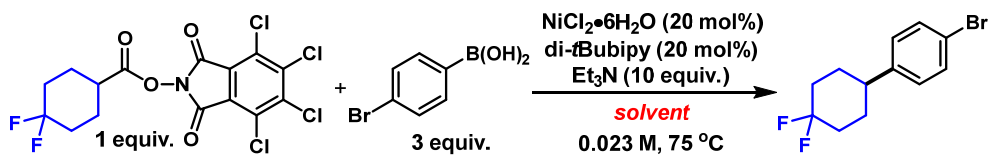

| Solvent                     | Yield (%) <sup>a</sup> |
|-----------------------------|------------------------|
| <i>1,4-dioxane/DMF 10/1</i> | 82                     |
| THF/DMF 10/1                | 10                     |
| dioxane                     | 20 <sup>b</sup>        |
| DMF                         | <5                     |

<sup>a</sup>Yields determined by GC-FID with dodecane as internal standard, <sup>b</sup>isolated yield

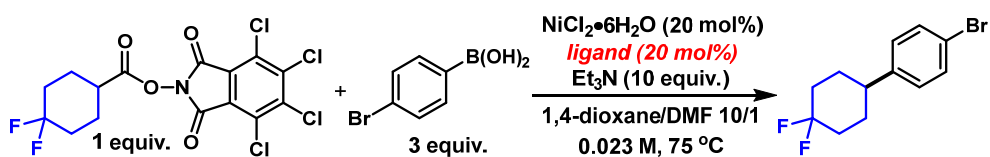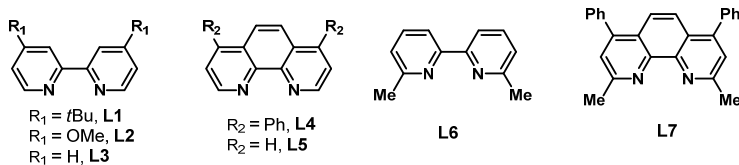

| Ligand              | Yield (%) <sup>a</sup> |
|---------------------|------------------------|
| <b>L1</b>           | 82                     |
| <b>L2</b>           | 64                     |
| <b>L3</b>           | 58                     |
| <b>L4</b>           | 82                     |
| <b>L5</b>           | 61                     |
| <b>L6</b>           | <5                     |
| <b>L7</b>           | <5                     |
| <b>L1 (40 mol%)</b> | 44                     |
| No ligand           | <5                     |

<sup>a</sup>Yields determined by GC-FID with dodecane as internal standard

## Additional Optimization Details based on Various Substrates

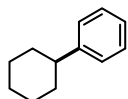

NiCl<sub>2</sub>·6H<sub>2</sub>O, dtbbpy

1. DMF, 0%
2. EA, 18%
3. CDCl<sub>3</sub>, trace
4. MeCN, trace
5. acetone, 6%
6. benzene, 51%
7. DME, 0%
8. dioxane, 65%
9. DMA, trace
10. MTBE, 33%
11. THF, 86%

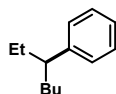

NiCl<sub>2</sub>·6H<sub>2</sub>O, dtbbpy

1. benzene, 4%
2. dioxane, 71%
3. MTBE, 52%
4. THF, 67%

NiCl<sub>2</sub>·6H<sub>2</sub>O, THF

1. tBubpy, 67%
2. bipy, 25%
3. phen, 0
4. bathophen, 69%
5. TMEDA, 0
6. TMPDA, 0

NiCl<sub>2</sub>·6H<sub>2</sub>O, dioxane

1. tBubpy, 71%
2. bipy, 0%
3. phen, 2%
4. bathophen, 72%
5. TMEDA, 0
6. TMPDA, 0

NiCl<sub>2</sub>·6H<sub>2</sub>O, dtbbpy

1. CCl<sub>4</sub>, 0%
2. iPr<sub>2</sub>O, 7%
3. DMSO, 0%
4. NMP, 0%
5. CH<sub>3</sub>NO<sub>2</sub>, 0%
6. HMPA, 0%
7. anisole, 7%
8. toluene, 4%
9. DCE, 17%
10. EE, 11%
11. pyridine, 0%
12. Et<sub>3</sub>N, 4%

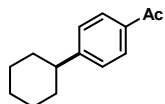

NiCl<sub>2</sub>·6H<sub>2</sub>O, dtbbpy

1. benzene, 6%
2. dioxane, 45%
3. MTBE, trace
4. THF, trace

NiCl<sub>2</sub>·6H<sub>2</sub>O, THF

1. tBubipy trace
2. bipy, 0
3. phen, 0
4. bathophen, 0
5. TMEDA, 0
6. TMPDA, 0

NiCl<sub>2</sub>·6H<sub>2</sub>O, dioxane

1. tBubpy, 45%
2. bipy, 0
3. phen, 0
4. bathophen, 42%
5. TMEDA, 0
6. TMPDA, 0

NiCl<sub>2</sub>-glyme, dioxane

1. tBubipy 46%
2. bathophen, 30%

NiCl<sub>2</sub>(dtbbpy)-solid

- THF, 22%
- dioxane, 42%

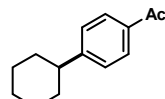

NiCl<sub>2</sub>·6H<sub>2</sub>O, dtbbpy, dioxane

- MeOH (8 uL, 2 eq), 23%
- iPrOH (15 uL, 2 eq), 38%
- PhNMe<sub>2</sub> (13 uL, 1.0 eq), trace
- tBuOH (22 uL, 2 eq), 16%
- Zn powder (3 mg, 0.5 eq), 43%
- LiCl (4 mg, 1 eq), trace
- LiF (2.6 mg, 1 eq), 46%
- B(C<sub>6</sub>F<sub>5</sub>)<sub>3</sub> (26mg, 0.5 eq), 16%
- ZnCl<sub>2</sub> (1.0 M, 50 uL, 0.5 eq), 26%
- 3A MS, 46%
- 4A MS, 39%
- 70 °C, 57%
- 75 °C, 68%
- 80 °C, 57%
- 90 °C, 35%
- 100 °C, 28%

NiCl<sub>2</sub>·6H<sub>2</sub>O, dtbbpy, dioxane

1. K<sub>2</sub>CO<sub>3</sub> (3.5 eq), 16%
2. CsOPiv (3.5 eq), 0%
3. Cs<sub>2</sub>CO<sub>3</sub> (3.5 eq), ~ 10% prod
4. K<sub>3</sub>PO<sub>4</sub> (3.5 eq), ~ 5% prod
5. KF (3.5 eq), < 5%
6. LiF (3.5 eq), < 5%

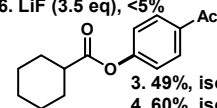

3. 49%, isolated

4. 60%, isolated

1. Ni(acac)<sub>2</sub>, 0%
2. Ni(NO<sub>3</sub>)<sub>2</sub>·6H<sub>2</sub>O, 8%
3. Ni(OAc)<sub>2</sub>·4H<sub>2</sub>O, 0%
4. NiF<sub>2</sub>·4H<sub>2</sub>O, 0%
5. Ni(OMe)<sub>2</sub>, 0%
6. NiBr<sub>2</sub>-glyme, ~5%

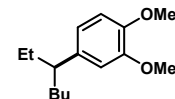

NiCl<sub>2</sub>·6H<sub>2</sub>O, dtbbpy

1. THF/DCE 1/1, 21%
2. THF/DCE 1/4, 10%
3. dioxane/DCE 1/1, 10%
4. dioxane/DCE 1/4, 7%

NiCl<sub>2</sub>·6H<sub>2</sub>O, THF

1. tBubipy, 25%
2. bathophen, 20%

NiCl<sub>2</sub>·6H<sub>2</sub>O, dioxane

1. tBubipy, 10%
2. bathophen, 24%

NiCl<sub>2</sub>(dtbbpy)-dioxane, 30%

y)-dioxane, 27%

solid

H<sub>2</sub>O addition

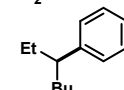

NiCl<sub>2</sub>-glyme, dtbbpy

1. 0 equiv H<sub>2</sub>O 56%
2. 1 equiv H<sub>2</sub>O 56%
3. 2 equiv H<sub>2</sub>O 61%
4. 3 equiv H<sub>2</sub>O 28%
5. 5 equiv H<sub>2</sub>O 11%
6. 10 equiv H<sub>2</sub>O 0%
7. 20 equiv H<sub>2</sub>O 0%

base screening

NiCl<sub>2</sub>·6H<sub>2</sub>O, dtbbpy, THF

1. Et<sub>3</sub>N 45%
2. DIPEA 40%
3. pyridine 0%
4. DBU 0%
5. tBuTMG 0%
6. TMEDA 0%
7. Bu<sub>3</sub>N 35%
8. DMAP 0%
9. PhNMe<sub>2</sub> 0%
10. N-Me pyrrolidine 0%
11. N-Me piperidine 0%
12. 1-Me imidazole 0%

All screens are at 60 °C unless otherwise mentioned.

## General Procedure for the Ni-Catalyzed Cross-Coupling of Alkyl Redox-Active Esters and Aryl Boronic Acids (General Procedure B)

### Part I. Preparation of NiCl<sub>2</sub>•6H<sub>2</sub>O/ligand Stock Solution (0.05 M in DMF)

A culture tube was charged with NiCl<sub>2</sub>•6H<sub>2</sub>O (71.3 mg, 0.3 mmol) and ligand (80.5 mg, 0.3 mmol for di-*t*Bubipy (L1) or 99.7 mg, 0.3 mmol for bathophenanthroline (L4)). The tube was then evacuated and backfilled with argon from a balloon 3 times. DMF (6.0 mL) was added and the resulting mixture was stirred at room temperature for 3 hours to give a homogeneous green solution, which could be used for several days without appreciable deterioration.

### Part II. Ni-Catalyzed Cross-Coupling Reaction

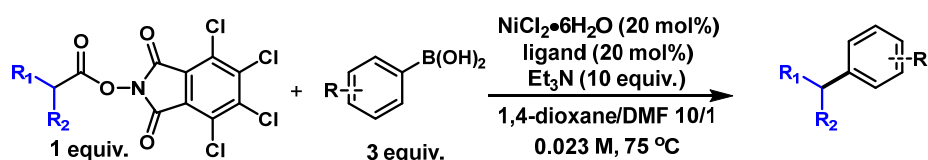

A culture tube was charged with TCNHPI redox-active ester (0.1 mmol, 1.0 equiv.), aryl boronic acid (0.3 mmol, 3.0 equiv.) and a stir bar. The tube was then evacuated and backfilled with argon from a balloon. This process was repeated for three times in total. 1,4-Dioxane (4.0 mL) was added and the resulting mixture was stirred for 1 minutes before Et<sub>3</sub>N (139 μL, 10.0 equiv.) was added. The mixture was stirred for 2-5 minutes until becoming homogeneous. Then, a solution of NiCl<sub>2</sub>•6H<sub>2</sub>O/ligand (0.05M in DMF, 0.4 mL, 20 mol%) was added and the tube was immediately placed in a preheated 75 °C oil bath for 12 hours under stirring. *NOTE: It is very important that the entirety of the reaction mixture is submerged in the heated oil bath to ensure the success and reproducibility of the reaction.* After 12 hours, the reaction mixture was allowed to cool to room temperature. The mixture was then diluted with ether or EtOAc, washed with 0.1 M aqueous HCl (not for acid-sensitive substrates), water and brine successively. The organic layer was dried over Na<sub>2</sub>SO<sub>4</sub> and concentrated under vacuum by rotary evaporator in a water bath at 35 – 40 °C. The crude product was purified by silica gel flash column chromatography or preparative TLC (PTLC) to

yield the pure compound.

Also see *Zero-Precaution Setup* section for a potentially more convenient setup for this reaction.

**Graphical Supporting Information for the Ni-Catalyzed Cross-Coupling of Redox-Active Esters and Boronic Acids: *tert*-Butyl 4-(4-acetylphenyl) piperidine-1-carboxylate (22)**

**Part I. Preparation of NiCl<sub>2</sub>•6H<sub>2</sub>O/*di-t*Bubipy Stock Solution (0.05 M in DMF)**

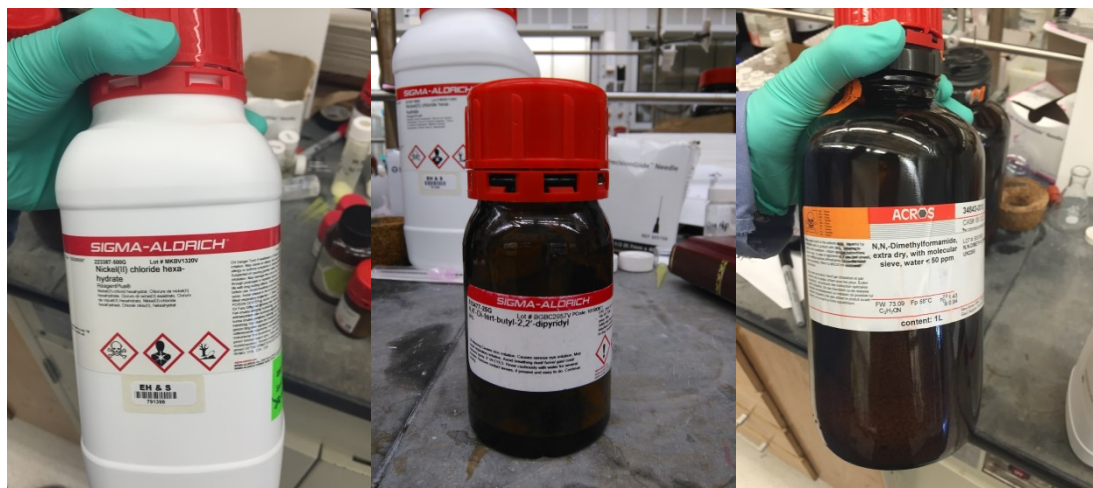

**(Left)** NiCl<sub>2</sub>•6H<sub>2</sub>O (500 g, Sigma-Aldrich). **(Center)** *di-t*Bubipy (25 g, Sigma-Aldrich). **(Right)** DMF (1 L sealed bottle, Acros).

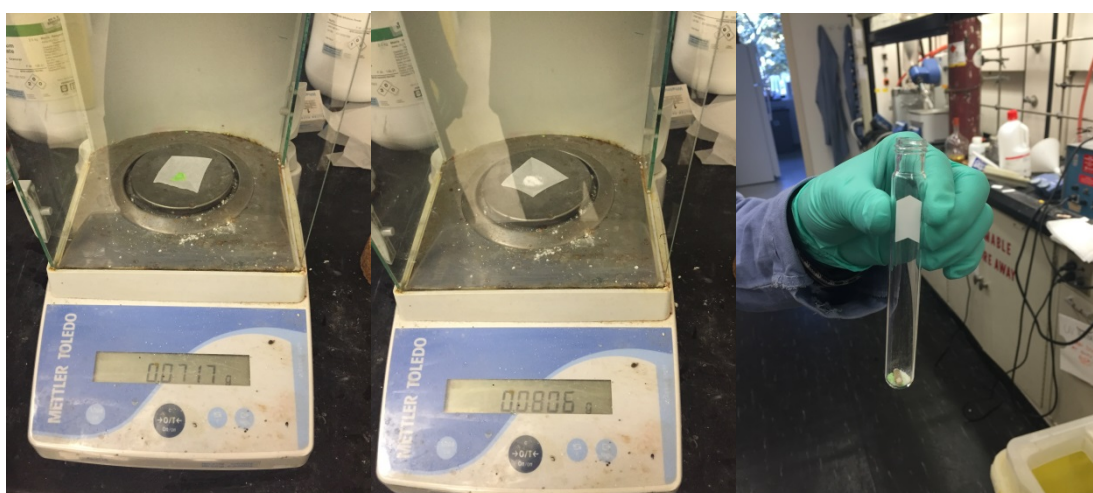

**(Left)** NiCl<sub>2</sub>•6H<sub>2</sub>O (71 mg). **(Center)** *di-t*Bubipy (81 mg). **(Right)** NiCl<sub>2</sub>•6H<sub>2</sub>O and *di-t*Bubipy were added to a medium-sized culture tube (without flame dry).

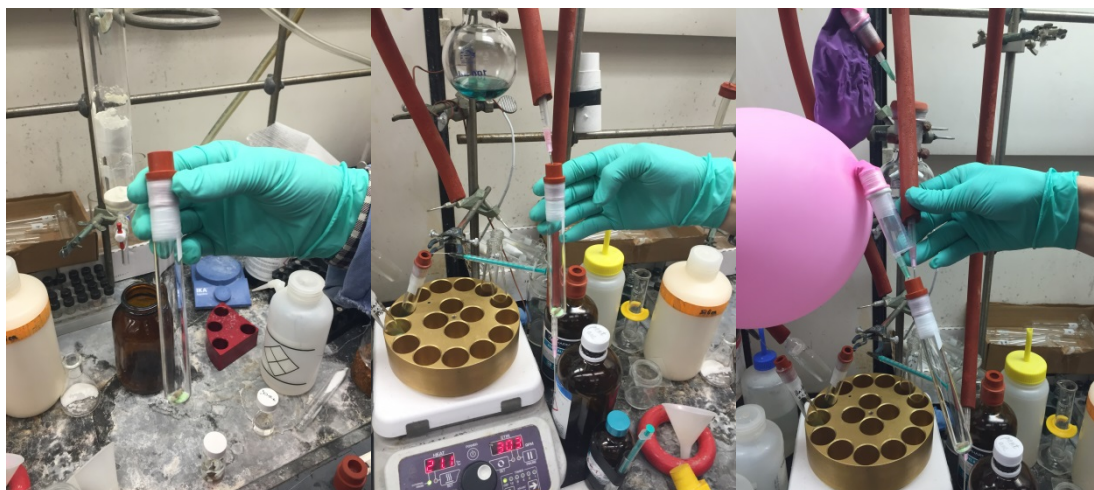

**(Left)** The tube is sealed with an inverted septum and parafilm. **(Center)** Evacuating the air from the tube. **(Right)** The tube is refilled with argon from a balloon. This was done 3 times in total.

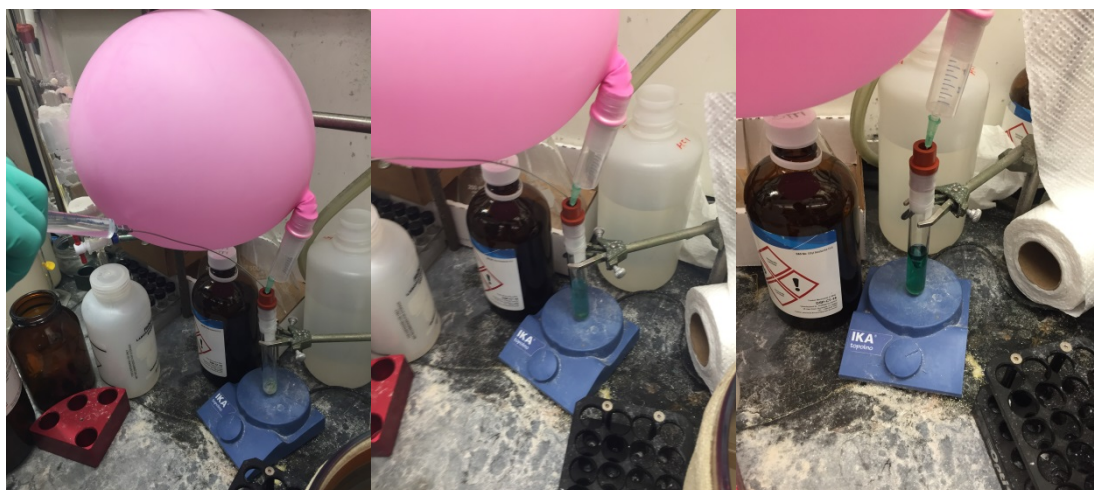

**(Left)** Addition of DMF (6.0 mL). **(Center)** After addition of DMF. **(Right)** After stirring for 3 hours. Note the clear and homogeneous green solution.



## Part II. Ni-Catalyzed Cross-Coupling Reaction

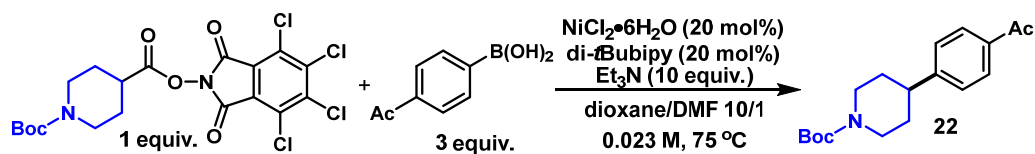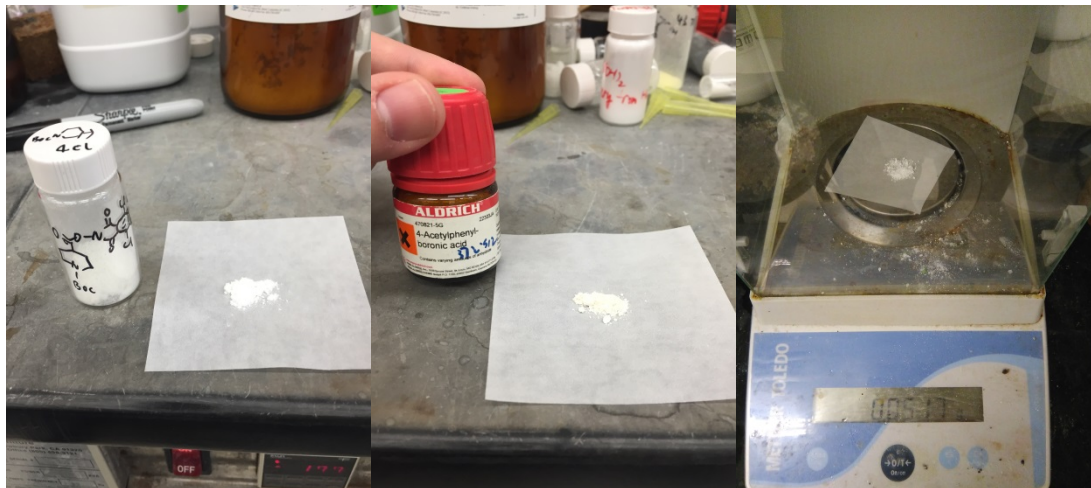

(Left) 1-(*tert*-butyl) 4-(4,5,6,7-tetrachloro-1,3-dioxoisindolin-2-yl) piperidine-1,4-dicarboxylate. (Center) 4-acetylphenylboronic acid (Aldrich, off-white solid). (Right) 1-(*tert*-butyl) 4-(4,5,6,7-tetrachloro-1,3-dioxoisindolin-2-yl) piperidine-1,4-dicarboxylate (51 mg, 0.1 mmol).

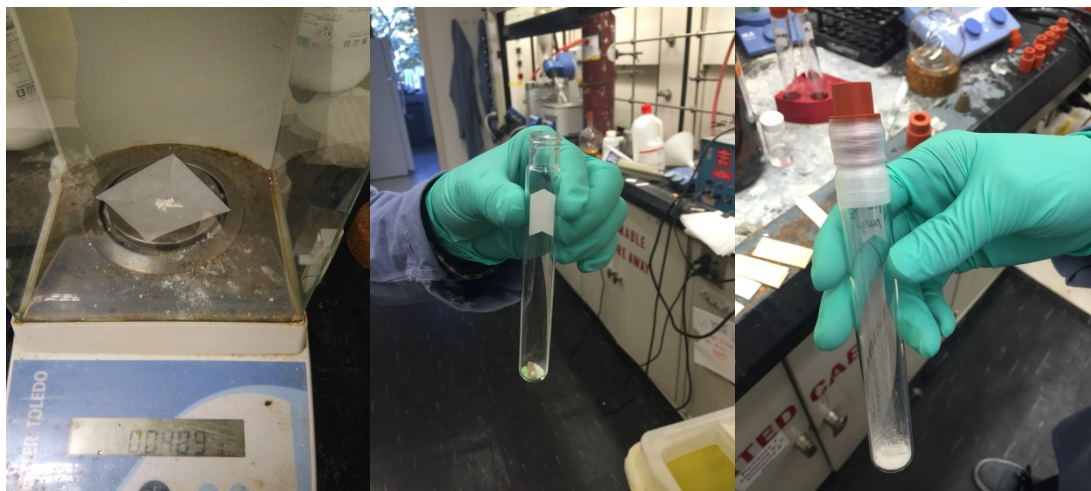

(Left) 4-acetylphenylboronic acid (49 mg, 0.3 mmol). (Center) Redox-active ester and boronic acid were added to a large-sized culture tube. (Right) The tube is sealed with an inverted septum and parafilm.

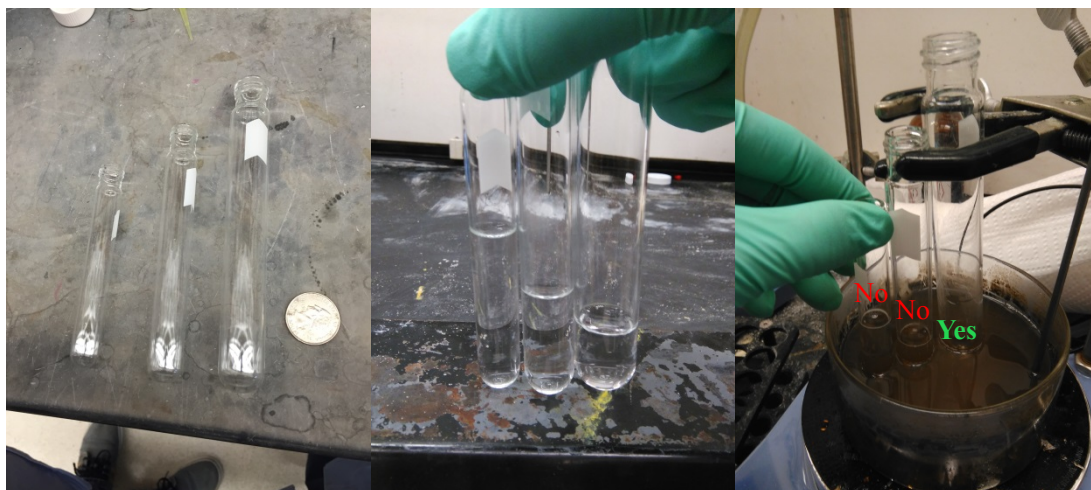

**(Left)** Three size of reaction tube: small, medium and large. **(Center)** The three different sized tubes containing 4.4 mL solvent each. **(Right)** Put them in the oil bath. *Note: we use the LARGE size for this reaction (the right one) to make sure the entirety of the reaction mixture is submerged in the heated oil bath. When we perform this reaction in the small or medium size tube, yield dropped 30% and 10% respectively because the mixture was not completely submerged.*

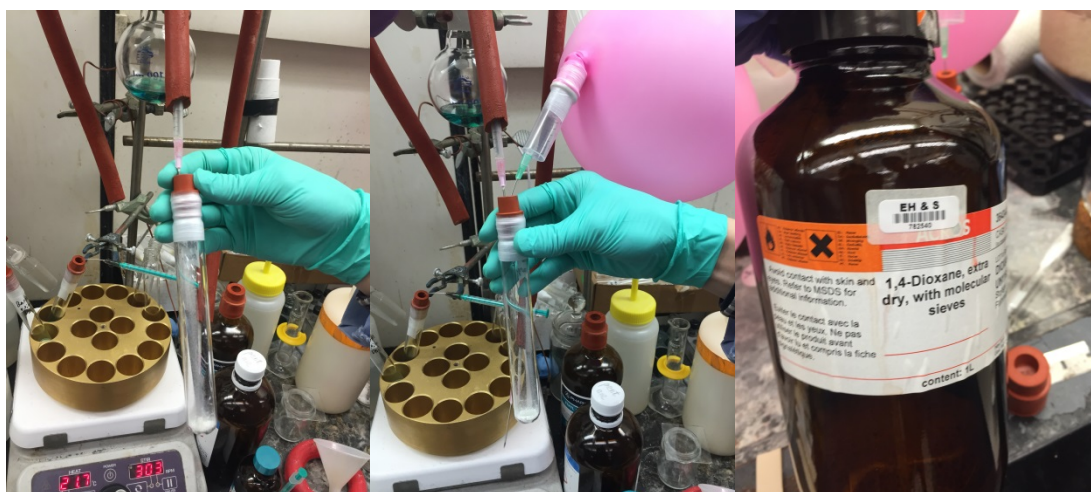

**(Left)** Evacuating the air from the tube. **(Center)** The tube is refilled with argon from a balloon. These steps are repeated for three times in total. **(Right)** 1,4-dioxane (1 L sealed bottle, Acros).

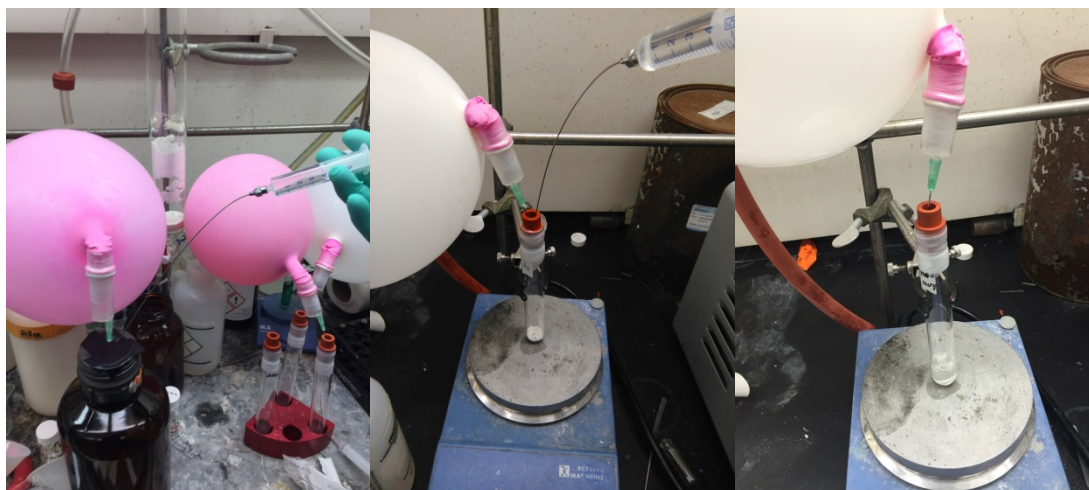

**(Left)** 1,4-dioxane is removed from the AcroSeal bottle. **(Center)** Addition of 1,4-dioxane. **(Right)** After addition, the mixture is stirred for 1 min.

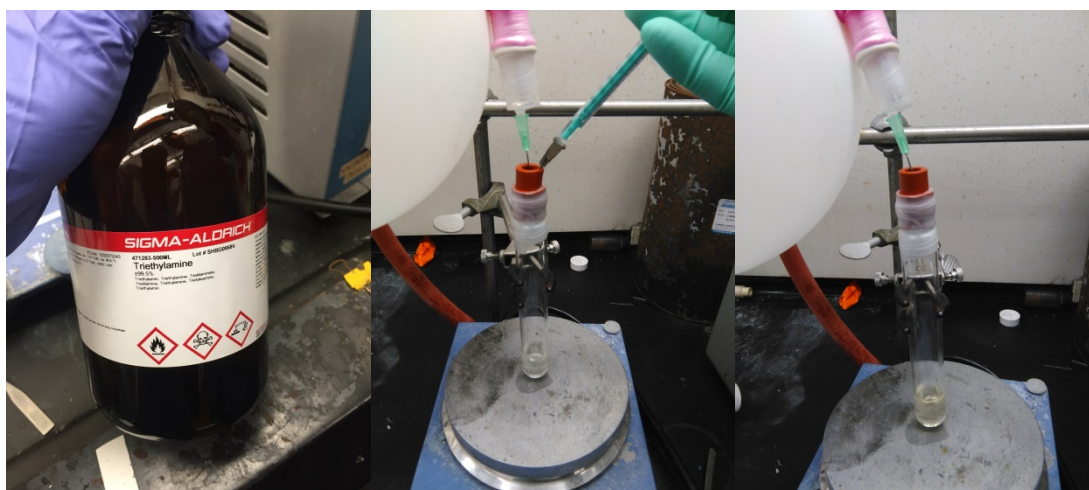

**(Left)** Triethylamine (500 mL sealed bottle, Sigma-Aldrich). **(Center)** Adding Et<sub>3</sub>N (139  $\mu$ L, 10.0 equiv.) to the reaction mixture. **(Right)** The reaction mixture was stirred for 2-5 min until it became homogenous. For this example, the mixture became homogeneous immediately. For some boronic acids, it could take a while, typically 2-5 min.

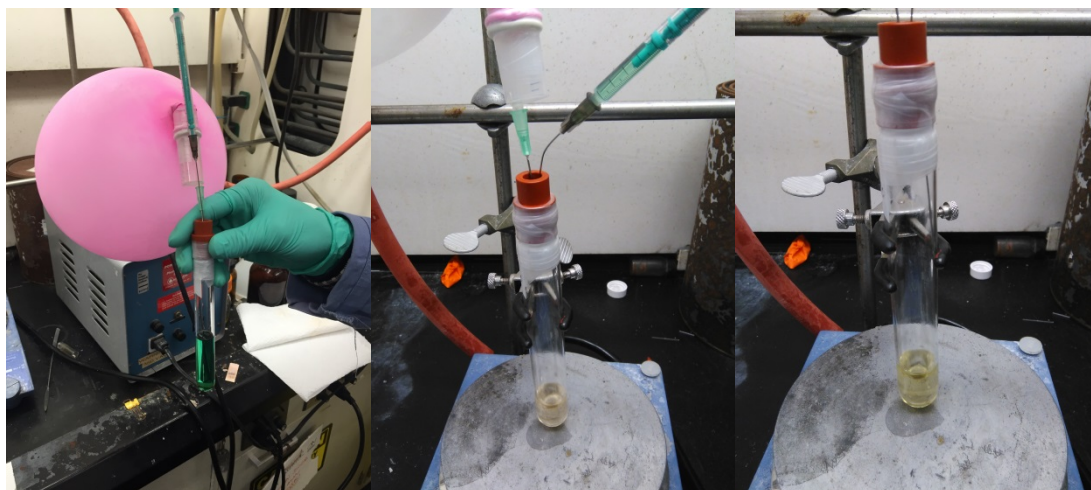

**(Left)** Prepared Ni/ligand complex stock solution in DMF. **(Center)** 0.4 mL Nickel complex DMF solution was adding into the tube while stirring. **(Right)** After addition.

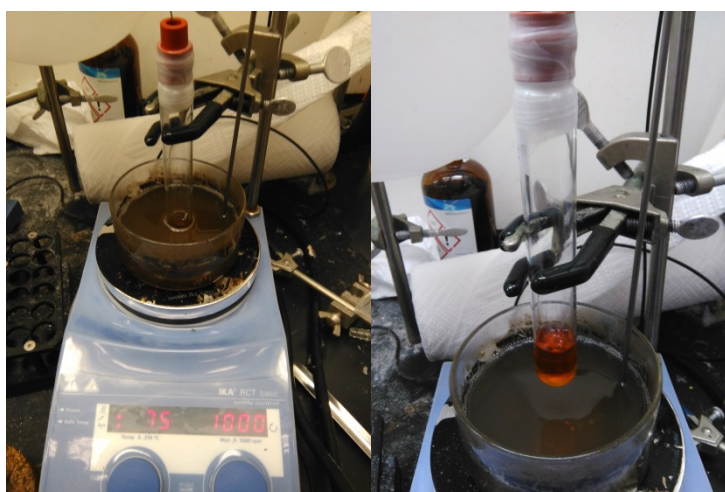

**(Left)** After addition of Ni/ligand complex, directly placed in preheated 75 °C oil bath. **(Right)** 5 min after heating, the reaction mixture turns red. Note: the red color changing is crucial for the success of the reaction.

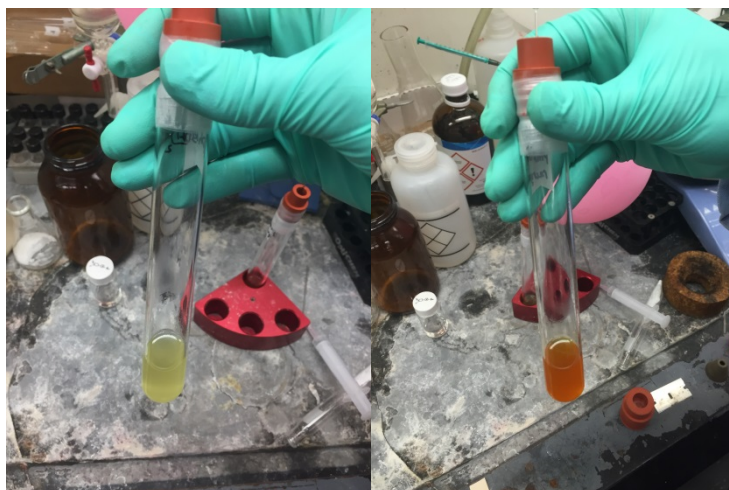

**(Left)** After 12 hours, the color turned light green, which is also observed for most substrates. **(Right)** For some other cases we have observed a reddish color.

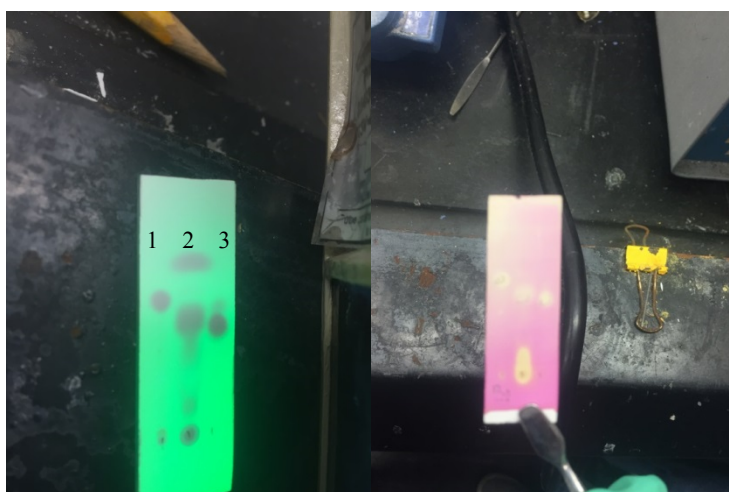

**(Left)** TLC under UV (hexanes/EtOAc 3:1), Lane 1: starting material, redox-active ester; Lane 2: reaction mixture (the front line spot is 4-acetylbenzene); Lane 3: pure product. **(Right)** After  $\text{KMnO}_4$  stain.

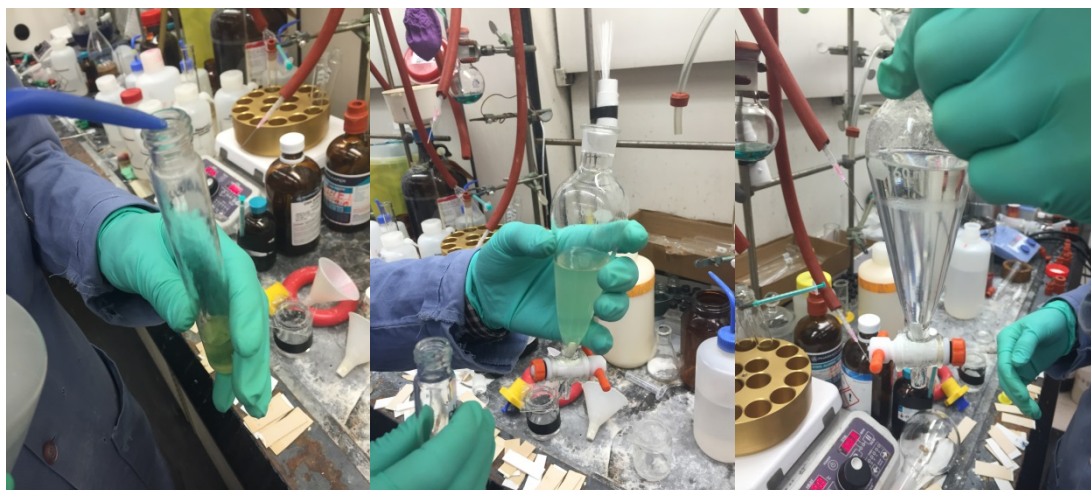

**(Left)** Dilution with  $\text{Et}_2\text{O}$ . **(Center)** Transfer to a separatory funnel. **(Right)** 0.1 M HCl wash.

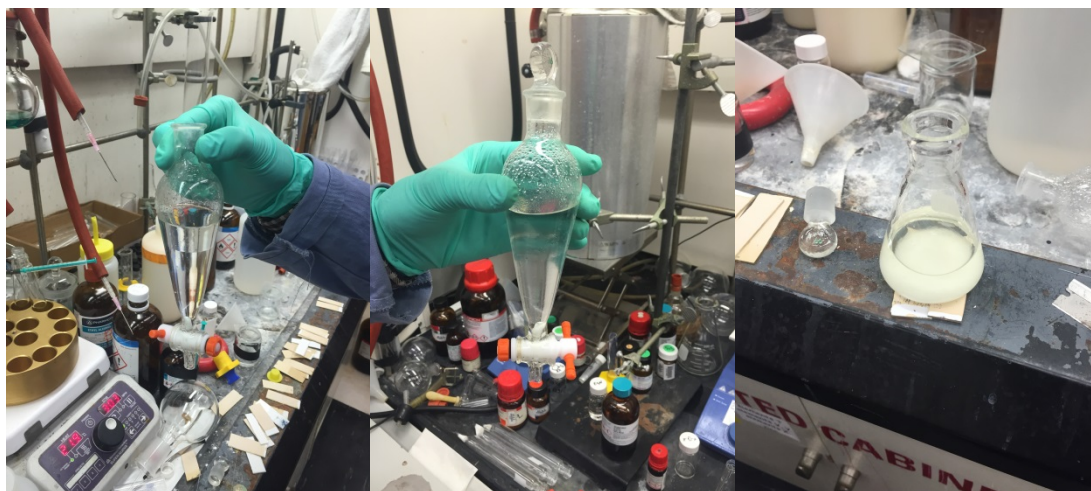

**(Left)**  $\text{H}_2\text{O}$  wash. **(Center)** Brine wash. **(Right)** Drying over  $\text{Na}_2\text{SO}_4$ .

## Zero-Precaution Setup

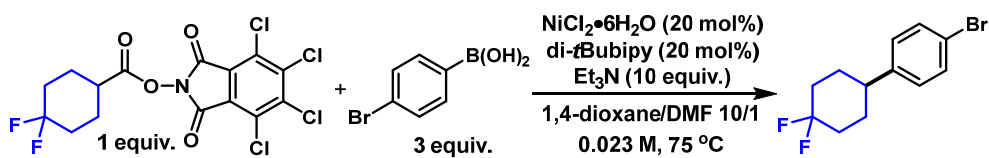

| Setup               | Yield (%) <sup>a</sup> |
|---------------------|------------------------|
| General Procedure B | 82                     |
| Procedure C         | 81                     |
| Procedure D         | 65 <sup>b</sup>        |

<sup>a</sup>Yields determined by GC-FID with dodecane as internal standard, <sup>b</sup>Isolated yields.

Procedure C: following the *General Procedure B* except for both the precatalyst preparation and cross-coupling reaction were not setup and run under inert argon atmosphere. Setup and Run the reactions open-flask instead.

Procedure D: following *Procedure C* using wet dioxane, DMF, and  $\text{Et}_3\text{N}$  instead of anhydrous solvents.

Procedure C shows this reaction is not sensitive to air at all. However, we did not run every substrates open-flask due to unknown stabilities for various boronic acids. We believe this convenient zero-precaution setup could be potentially general for most substrates.

Procedure D shows that the reaction is somewhat sensitive to water but will still work in good yield with less than ideal quality of reagents.

## Water Addition experiment

To better understand water tolerance of this reaction, we did water addition experiment and the results are listed below.

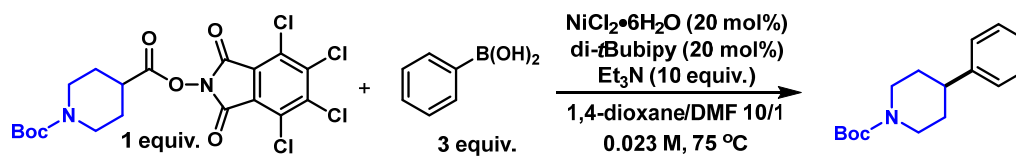

| H <sub>2</sub> O addition | Yield (%) <sup>a</sup> |
|---------------------------|------------------------|
| 0 equiv                   | 90                     |
| 1 equiv                   | 89                     |
| 2 equiv.                  | 70                     |
| 3 equiv                   | 53                     |
| 5 equiv                   | 25                     |

<sup>a</sup>Isolated yields.



## General Procedure for the Gram-Scale Ni-Catalyzed Cross-Coupling Reaction: *tert*-Butyl 4-(4-bromophenyl)piperidine-1-carboxylate (**4**)

### Part I. Preparation of NiCl<sub>2</sub>•6H<sub>2</sub>O/*di-t*Bubipy Stock Solution (0.05 M in DMF)

A 100 mL round bottom flask was charged with NiCl<sub>2</sub>•6H<sub>2</sub>O (237.7 mg, 1.0 mmol) and *di-t*Bubipy (**L1**, 268.4 mg, 1.0 mmol). The flask was then evacuated and backfilled with argon from a balloon 3 times. DMF (20.0 mL) was added and the resulting mixture was stirred at room temperature for 3 hours to give a homogeneous green solution.

### Part II. Ni-Catalyzed Cross-Coupling Reaction

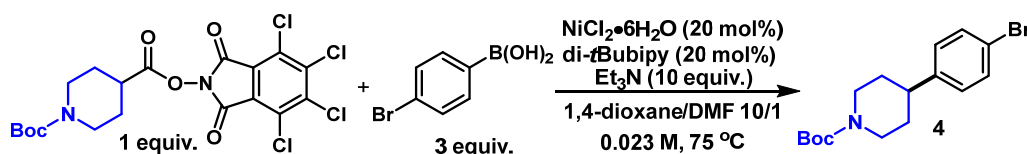

A 250 mL three-necked flask equipped with a thermometer was charged with 1-(*tert*-butyl 4-(4,5,6,7-tetrachloro-1,3-dioxoisindolin-2-yl)piperidine-1,4-dicarboxylate (1.28g, 2.5 mmol, 1.0 equiv.), 4-bromophenyl boronic acid (1.50 g, 3.0 equiv.) and a stir bar. The flask was then evacuated and backfilled with argon 3 times. Dioxane (100 mL) was added, and the resulting mixture was stirred for 2 minutes before being charged with Et<sub>3</sub>N (3.5 mL, 10.0 equiv.). The mixture was placed into a preheated 75 °C oil bath. After the inner temperature of the solution reached 75 °C indicated by thermometer, a solution of NiCl<sub>2</sub>•6H<sub>2</sub>O/*di-t*Bubipy (0.05M in DMF, 10 mL, 20 mol%) was added in one portion. The reaction mixture immediately turned red and was stirred at 75 °C for 12 hours. The reaction mixture was cooled down to room temperature, and 1,4-dioxane was removed by rotary evaporator. The residue was diluted with Et<sub>2</sub>O, washed with 0.1 M HCl, water, and brine successively. The organic layer was dried over Na<sub>2</sub>SO<sub>4</sub> and concentrated under vacuum by rotary evaporator in a water bath at 35 °C. The crude product was purified by silica gel flash column chromatography (hexanes/EtOAc 9:1) and afforded the pure compound **4** in 61% yield (average of two runs, first run 516 mg, 61 %, second run 508 mg, 60%).

**Graphical Supporting Information for the Gram-Scale Ni-Catalyzed Cross-Coupling Reaction: *tert*-Butyl 4-(4-bromophenyl)piperidine-1-carboxylate (4)**

**Part I. Preparation of NiCl<sub>2</sub>•6H<sub>2</sub>O/*di-t*Bubipy Stock Solution (0.05 M in DMF)**



**(Left)** NiCl<sub>2</sub>•6H<sub>2</sub>O (500 g, Sigma-Aldrich) used in this reaction. **(Center)** *di-t*Bubipy (25 g, Sigma-Aldrich). **(Right)** DMF (1 L bottle, Acros).

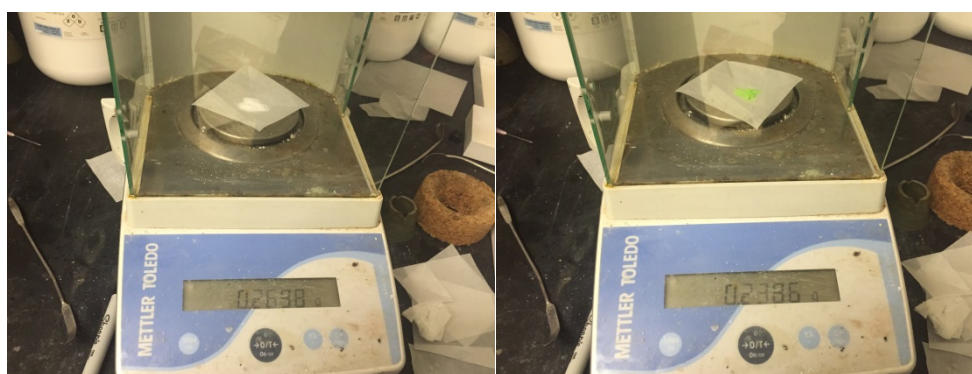

**(Left)** *di-t*Bubipy (270 mg). **(Right)** NiCl<sub>2</sub>•6H<sub>2</sub>O (239 mg).

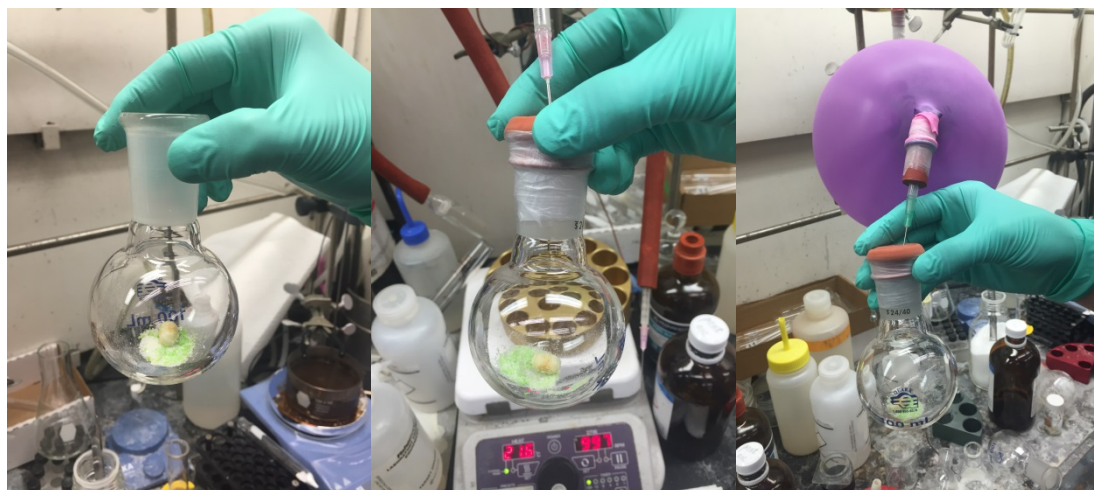

(Left) di-*t*Bubipy and  $\text{NiCl}_2 \cdot 6\text{H}_2\text{O}$  in a 100 mL round-bottom flask (not flame-dried) with a stir bar. (Center) The flask was sealed with a septum, wrapped with parafilm, and evacuated under vacuum. (Right) Refill the flask with argon. This was done 3 times in total.

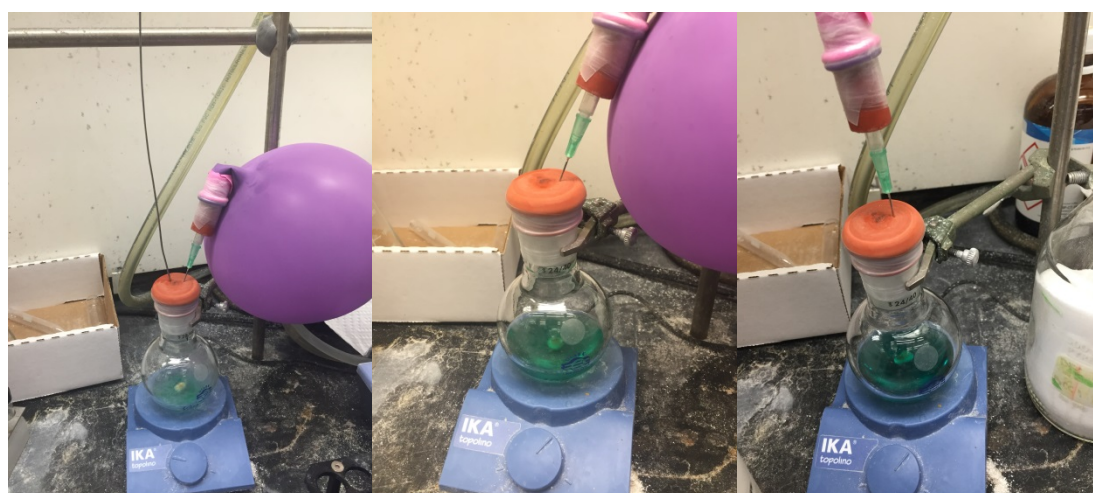

(Left) Addition of 20 mL DMF into the flask. (Center) After addition of 20 mL of DMF. (Right) After stirring for 3 hours. Note the clear and homogeneous green solution.

## Part II. Ni-Catalyzed Cross-Coupling Reaction

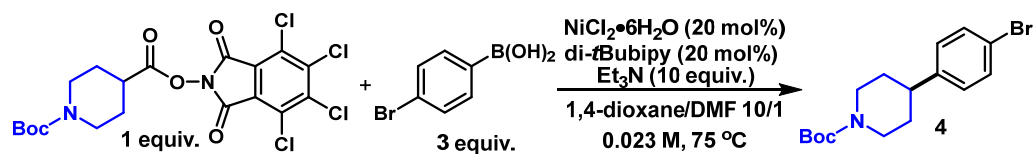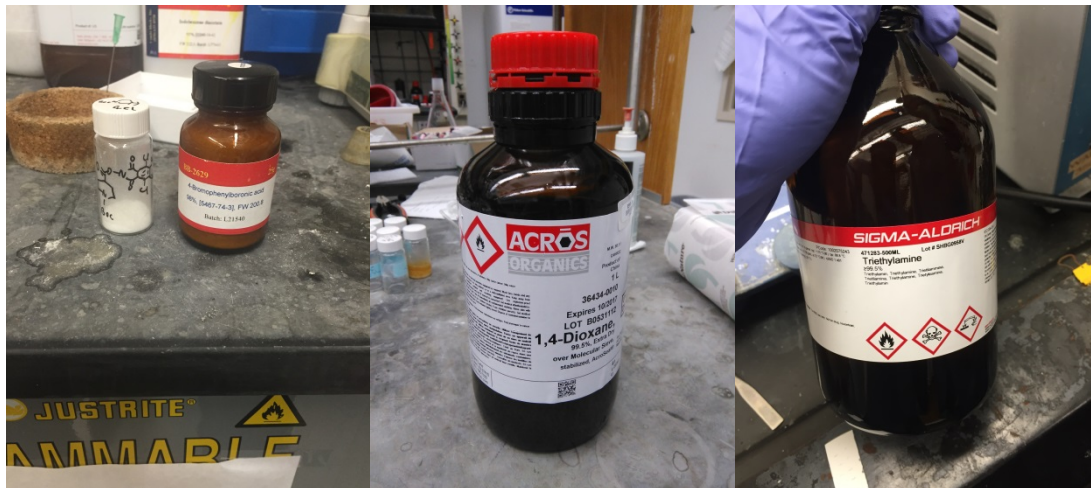

**(Left)** 1-(*tert*-butyl) 4-(4,5,6,7-tetrachloro-1,3-dioxoisindolin-2-yl) piperidine-1,4-dicarboxylate (white powder) and 4-bromophenyl boronic acid (25 g, Combi-Blocks).  
**(Center)** 1,4-dioxane (1 L bottle, Acros). **(Right)** Et<sub>3</sub>N (500 mL, Sigma-Aldrich).

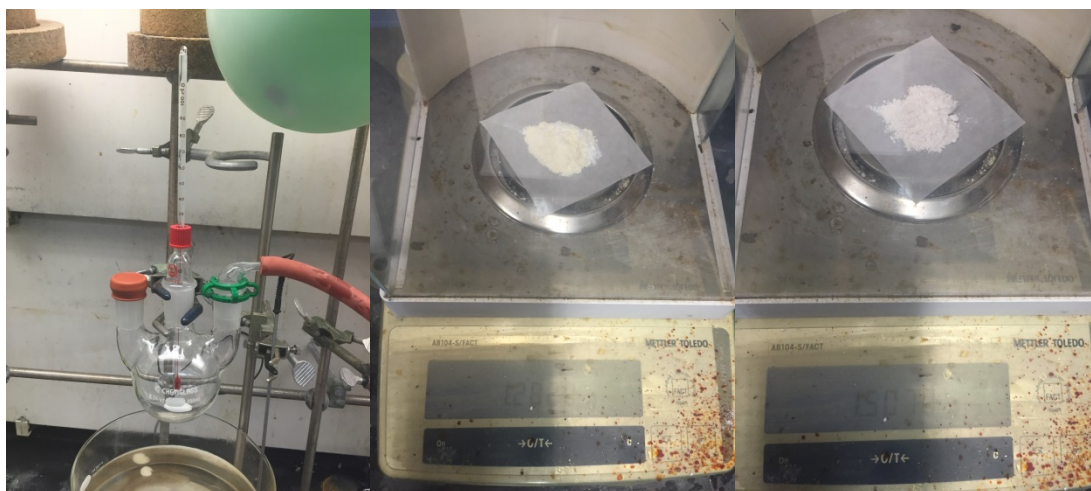

**(Left)** 250 mL three-necked flask equipped with thermometer. **(Center)** 1-(*tert*-butyl) 4-(4,5,6,7-tetrachloro-1,3-dioxoisindolin-2-yl) piperidine-1,4-dicarboxylate (1.28 g, 2.5 mmol). **(Right)** 4-bromophenyl boronic acid (1.50 g, 3.0 equiv.).

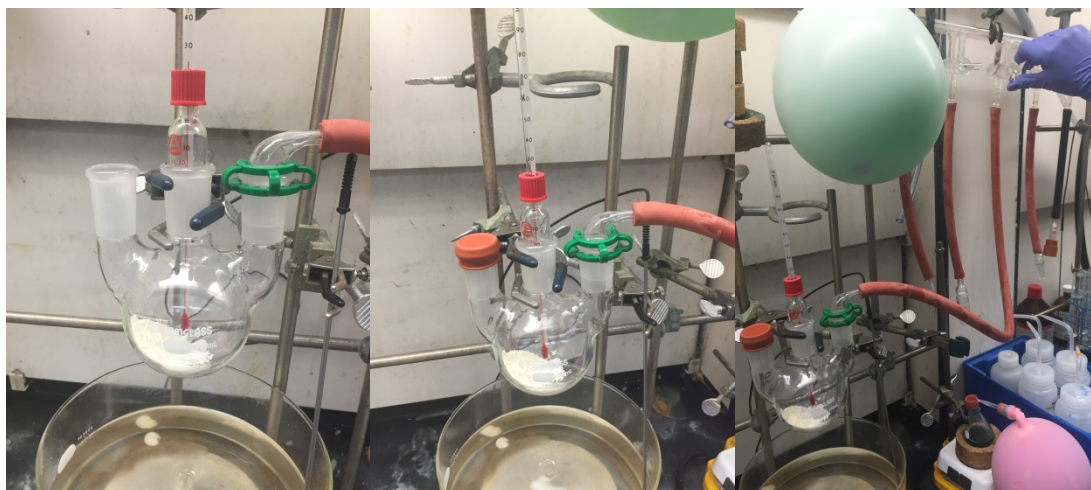

**(Left)** Transfer 1-(*tert*-butyl) 4-(4,5,6,7-tetrachloro-1,3-dioxoisindolin-2-yl) piperidine-1,4-dicarboxylate and 4-bromophenyl boronic acid to the three-necked flask. **(Center)** Evacuated the flask under vacuum. **(Right)** Refill the flask with argon. This process was repeated for three times in total.

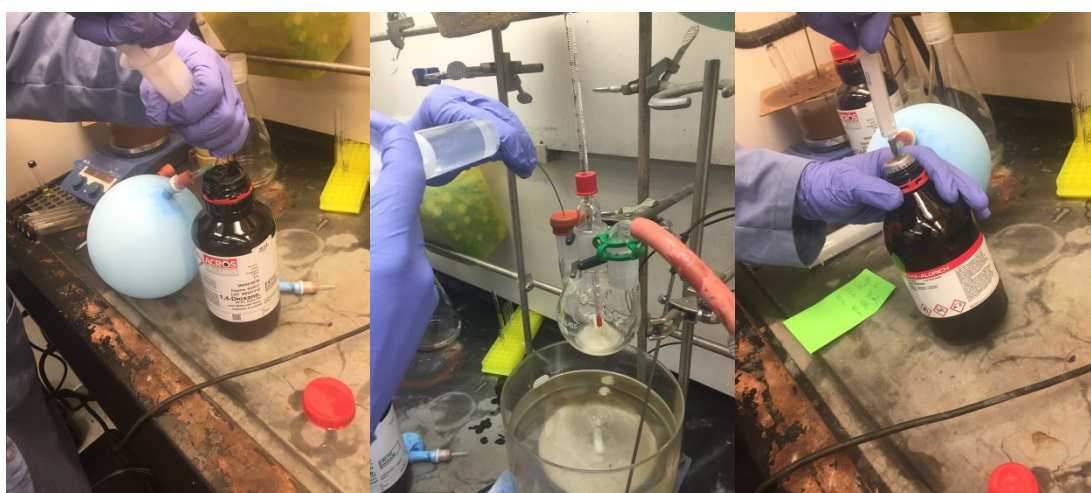

**(Left)** 1,4-dioxane (100 mL). **(Center)** Adding 1,4-dioxane to the 250 mL three-necked flask. **(Right)** Et<sub>3</sub>N (3.47 mL).

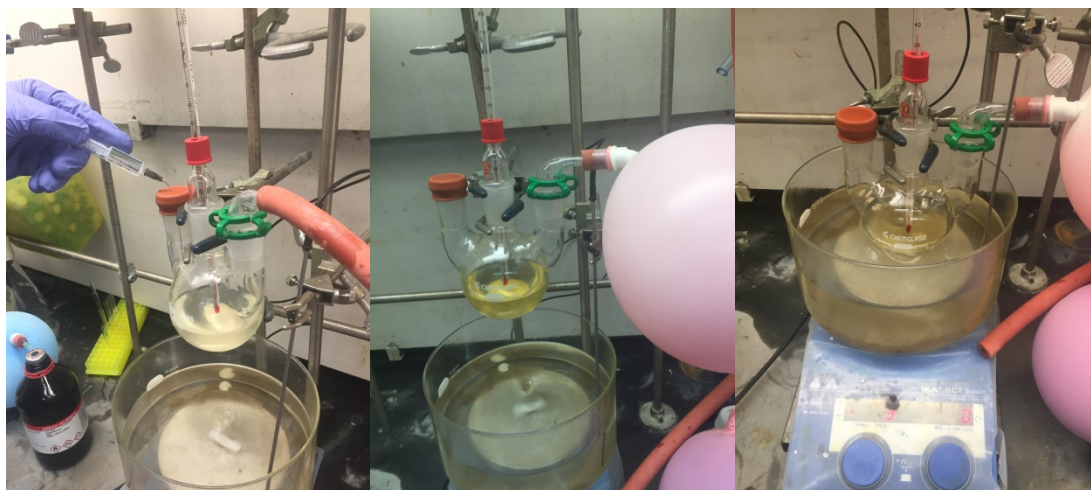

**(Left)** Addition of  $\text{Et}_3\text{N}$  (3.47 mL). **(Center)** After addition of  $\text{Et}_3\text{N}$ . **(Right)** The flask was placed in a preheated  $75\text{ }^\circ\text{C}$  oil bath.

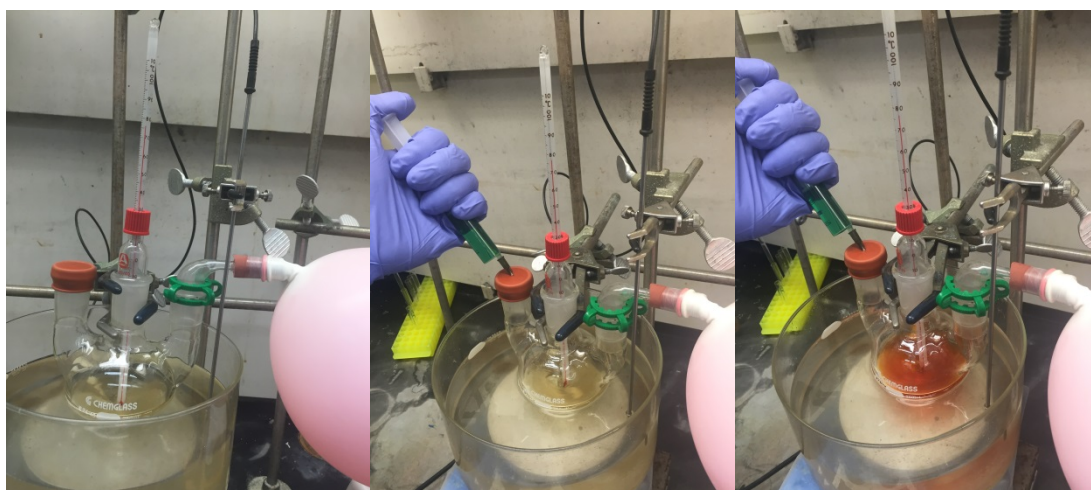

**(Left)** Internal temperature reached  $75\text{ }^\circ\text{C}$  indicated by thermometer. **(Center)** Adding Ni/ligand complex (0.05 M in DMF, 10.0 mL, 20 mol%). **(Right)** Reaction mixture immediately turned red after first drop of Ni/ligand complex.

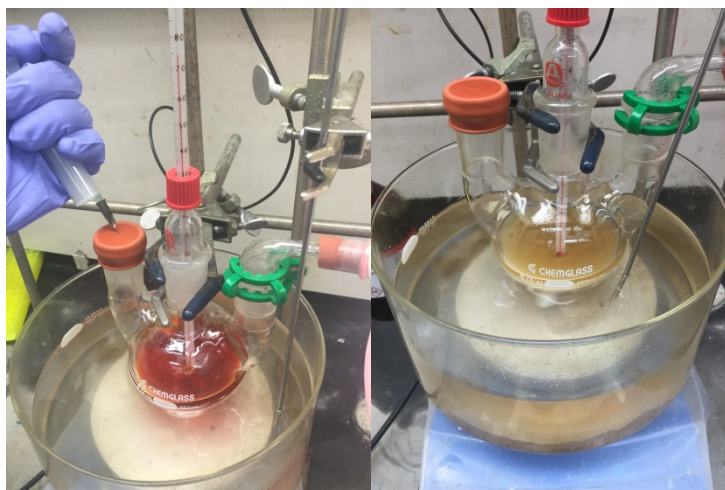

**(Left)** Completed addition of Ni/Ligand solution. **(Right)** Reaction mixture after stirring for 3 hours.

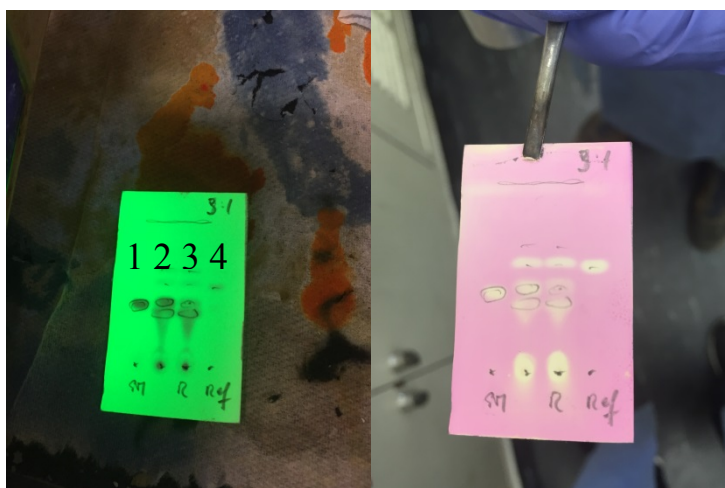

**(Left)** TLC under UV (hexanes/EtOAc 3:1), Lane 1: starting material, redox-active ester; Lane 2: co-spot of starting material and reaction mixture; Lane 3: reaction mixture. Lane 4: pure product. **(Right)** The same TLC after  $\text{KMnO}_4$  stain.

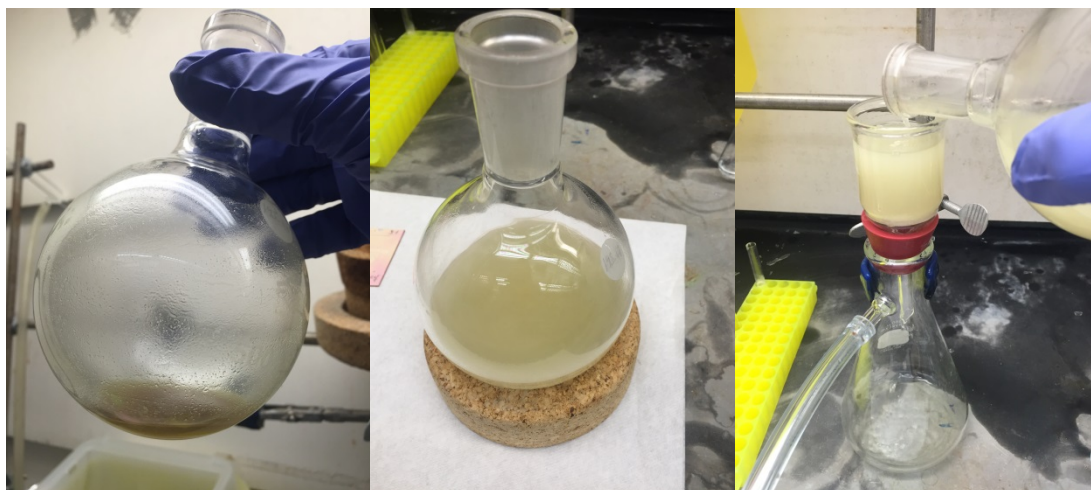

**(Left)** Residue after 1,4-dioxane was removed by rotavapor. **(Center)** Dilution with ether. **(Right)** Vacuum filtration.

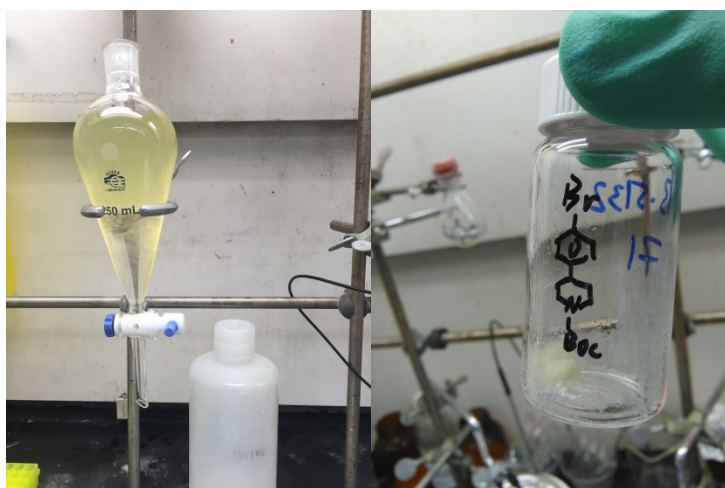

**(Left)** Wash with brine. **(Right)** Pure product after flash column chromatography.



## General Procedure for Cross-Coupling of Alkyl Redox-Active Esters and Aryl Boronic Acids with 10 mol% Nickel/ligand (General Procedure C)

### Part I. Preparation of NiCl<sub>2</sub>•6H<sub>2</sub>O/di-*t*Bubipy (L1) Stock Solution (0.025 M in DMF)

A culture tube was charged with NiCl<sub>2</sub>•6H<sub>2</sub>O (35.7 mg, 0.15 mmol) and di-*t*Bubipy (40.3 mg, 0.15 mmol). The tube was then evacuated and backfilled with argon from a balloon 3 times. DMF (6.0 mL) was added and the resulting mixture was stirred at room temperature for 3 hours to give a homogeneous green solution, which could be used for several days without appreciable deterioration.

### Part II. Ni-Catalyzed Cross-Coupling Reaction

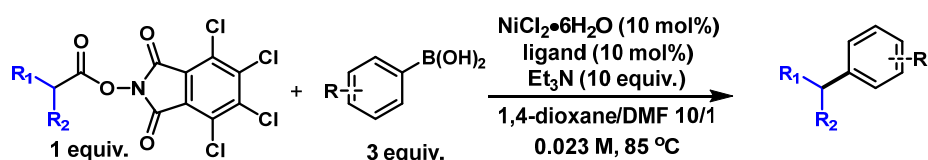

A culture tube was charged with TCNHPI redox-active ester (0.1 mmol, 1.0 equiv.), aryl boronic acid (0.3 mmol, 3.0 equiv.) and a stir bar. The tube was then evacuated and backfilled with argon from a balloon 3 times. 1,4-Dioxane (4.0 mL) was added and the resulting mixture was stirred for 1 minute before Et<sub>3</sub>N (139 μL, 10.0 equiv.) was added. The mixture was stirred for 2-5 minutes until becoming homogeneous. Then, a solution of NiCl<sub>2</sub>•6H<sub>2</sub>O/ di-*t*Bubipy (0.025M in DMF, 0.4 mL, 10 mol%) was added and the tube was immediately placed in a preheated 85 °C oil bath for 12 hours under stirring. *NOTE: It is very important that the entirety of the reaction mixture is submerged in the heated oil bath to ensure the success and reproducibility of the reaction.* After 12 hours, the reaction mixture was allowed to cool to room temperature, diluted with ether or EtOAc, washed with 0.1 M aqueous HCl (not for acid-sensitive substrates), water and brine successively. The organic layer was dried over Na<sub>2</sub>SO<sub>4</sub> and concentrated under vacuum by rotary evaporator in a water bath at 35 – 40 °C. The crude product was purified by silica gel flash column chromatography or preparative TLC (PTLC) to yield the pure compound.

## Examples of Cross-Coupling with 10 mol% Nickel

We demonstrated this 10 mol% nickel catalyzed cross-coupling with 5 examples based on *General Procedure C*.

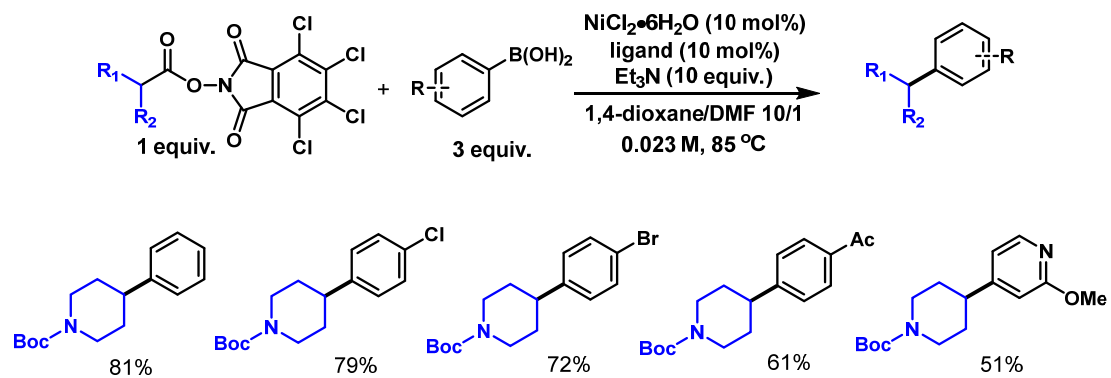

## General Procedure for *in situ* Ni-Catalyzed Cross-Coupling of Alkyl Carboxylic Acids and Aryl Boronic Acids (General Procedure D)

### Part I. Preparation of NiCl<sub>2</sub>•6H<sub>2</sub>O/bathophenanthroline (L4) Stock Solution (0.05 M in DMF)

A culture tube was charged with NiCl<sub>2</sub>•6H<sub>2</sub>O (71.3 mg, 0.3 mmol) and bathophenanthroline (99.7 mg, 0.3 mmol). The tube was then evacuated and backfilled with argon from a balloon 3 times. DMF (6.0 mL) was added and the resulting mixture was stirred at room temperature for 3 hours to give a homogeneous green solution, which could be used for several days without appreciable deterioration.

### Part II. Ni-Catalyzed Cross-Coupling Reaction

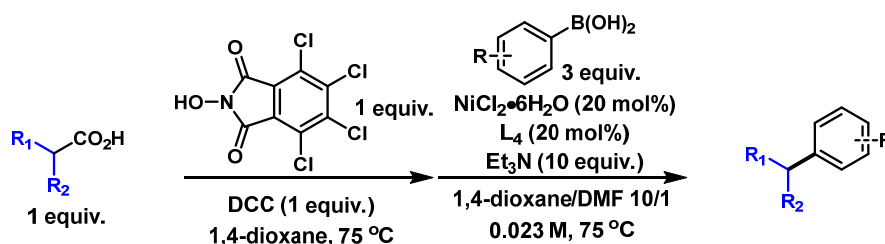

A culture tube was charged with alkyl carboxylic acid (1.0 equiv.), *N*-hydroxy-tetrachlorophthalimide (1.0 equiv.), *N,N'*-dicyclohexylcarbodiimide (1.0 equiv.) and a stir bar. The tube was then evacuated and backfilled with argon from a balloon. This process was repeated for three times in total. 1,4-Dioxane (3.0 mL) was added and the resulting mixture was placed in a preheated 75 °C oil bath and stirred until completion as indicated by TLC (typically 30-45 minutes). Aryl boronic acid (3 equiv.) was added quickly and more 1,4-dioxane (1 mL) was added for rinse. Et<sub>3</sub>N (139 μL, 10.0 equiv.) and a solution of NiCl<sub>2</sub>•6H<sub>2</sub>O/L<sub>4</sub> (0.05M in DMF, 0.4 mL, 20 mol%) was added successively and the tube was immediately placed in a preheated 75 °C oil bath for 12 hours under stirring. *NOTE: It is very important that the entirety of the reaction mixture is submerged in the heated oil bath to ensure the success and reproducibility of the reaction.* After 12 hours, the reaction mixture was allowed to cool to room temperature. The mixture was then diluted with ether or EtOAc, washed

with 0.1 M aqueous HCl (not for acid-sensitive substrates), water and brine successively. The organic layer was dried over Na<sub>2</sub>SO<sub>4</sub> and concentrated under vacuum by rotary evaporator in a water bath at 35 – 40 °C. The crude product was purified by silica gel flash column chromatography or preparative TLC (PTLC) to yield the pure compound.

**Graphical Supporting Information for *in situ* Ni-Catalyzed Cross-Coupling of Alkyl Carboxylic Acids and Aryl Boronic Acids: *tert*-Butyl 4-(4-acetylphenyl) piperidine-1-carboxylate (22)**

**Part I. Preparation of NiCl<sub>2</sub>•6H<sub>2</sub>O/bathophenanthroline Stock Solution (0.05 M in DMF)**

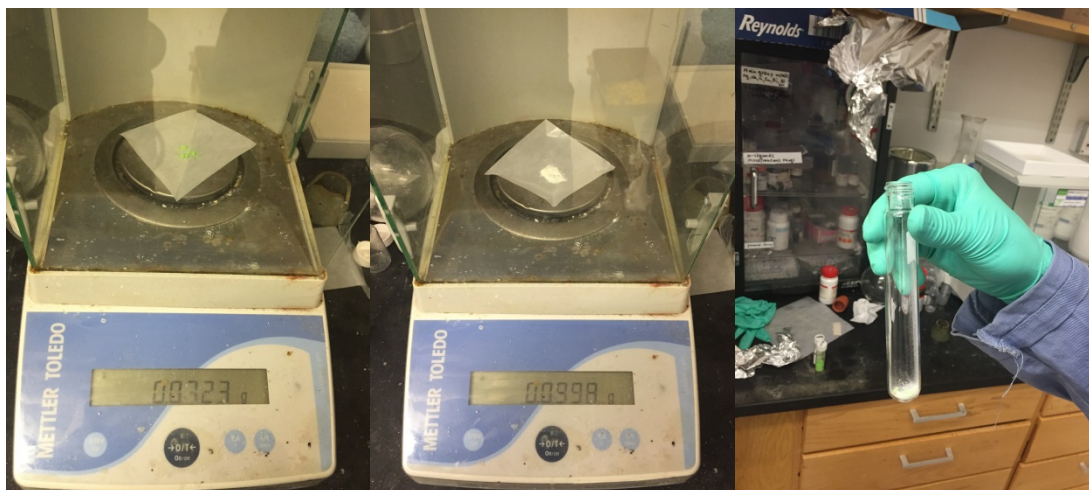

**(Left)** NiCl<sub>2</sub>•6H<sub>2</sub>O (72 mg). **(Center)** bathophenanthroline (100 mg). **(Right)** NiCl<sub>2</sub>•6H<sub>2</sub>O and bathophenanthroline in vial.

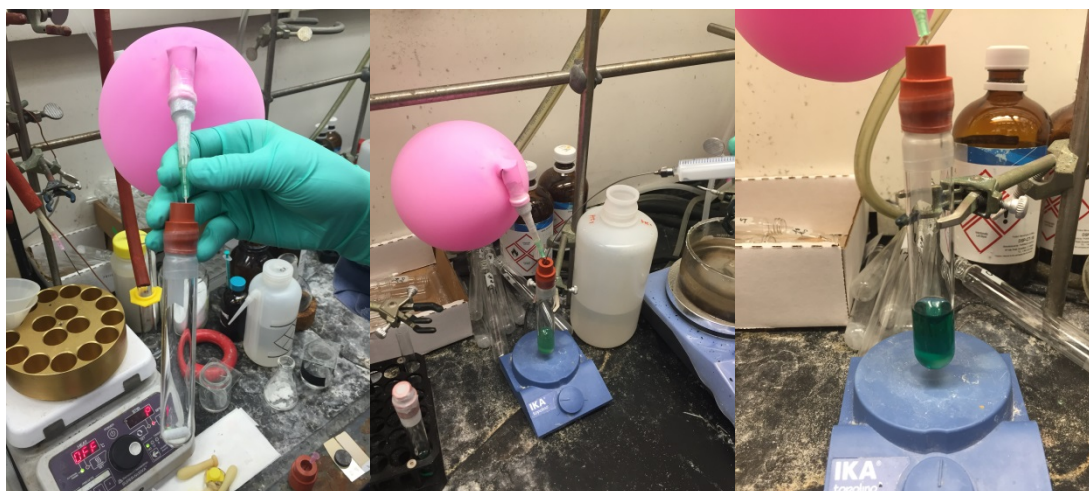

**(Left)** The flask with a stir bar was sealed with a septum, wrapped with parafilm, evacuated under vacuum and refilled with argon. This was done 3 times in total. **(Center)** Add DMF (6 mL) into the vial. **(Right)** After stirring for 3 hours at room temperature.

## Part II. Ni-Catalyzed Cross-Coupling Reaction

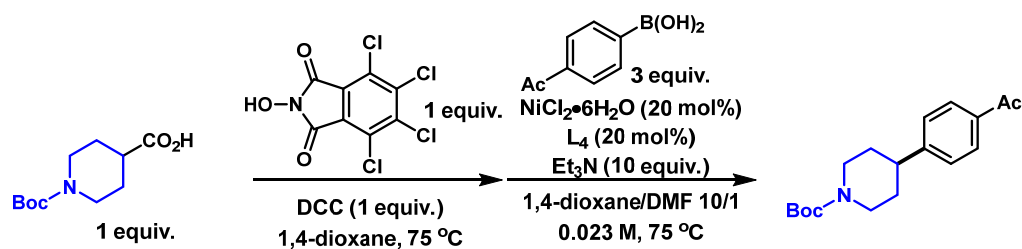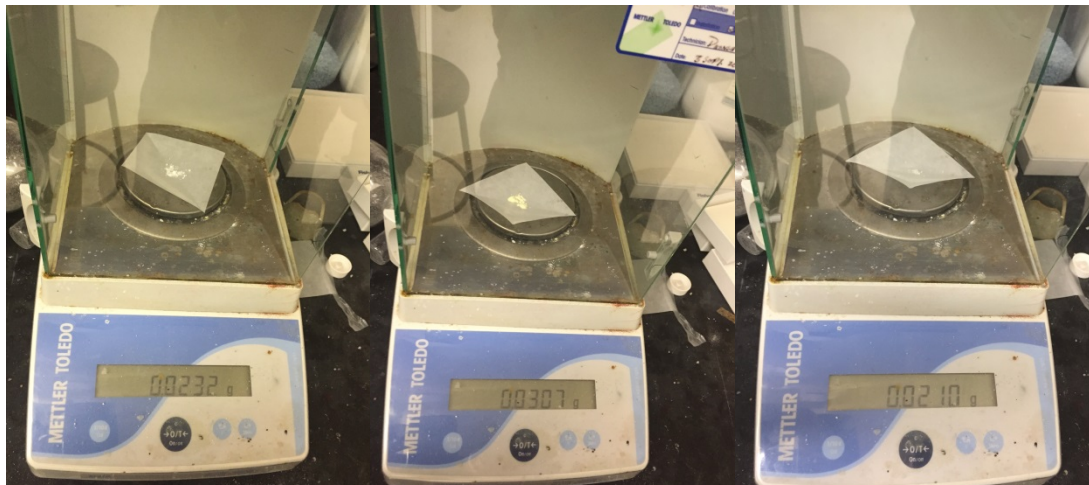

**(Left)** 1-(tert-butoxycarbonyl)piperidine-4-carboxylic acid (23 mg, 0.1 mmol). **(Center)** *N*-hydroxy-tetrachlorophthalimide (30 mg, 0.1 mmol). **(Right)** *N,N'*-dicyclohexylcarbodiimide (21 mg, 0.1 mmol).

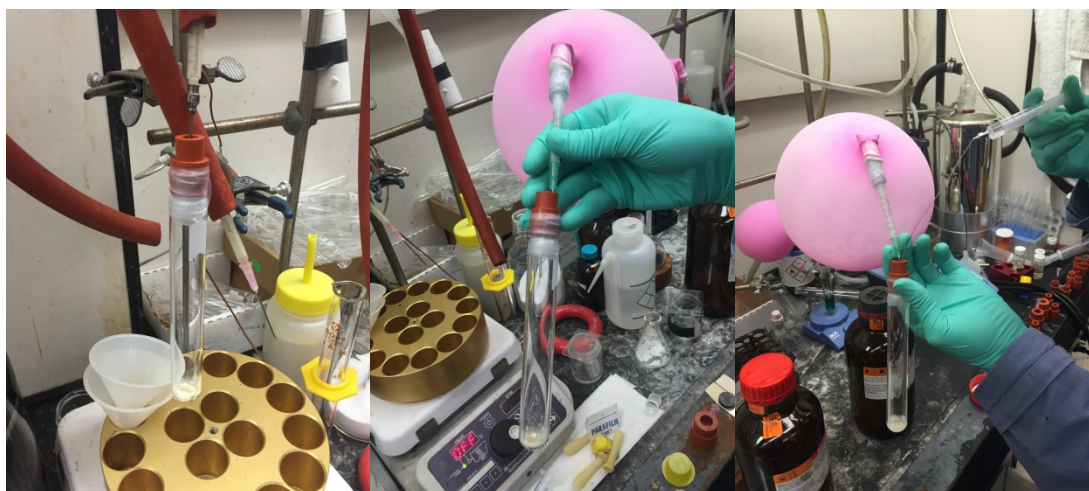

**(Left)** Put them into a vial with a stir bar. The vial was sealed with a septum, wrapped with parafilm and evacuated under vacuum. **(Center)** Refill the vial with argon. This was done 3 times in total. **(Right)** Add 1,4-dioxane (3 mL) into the vial.

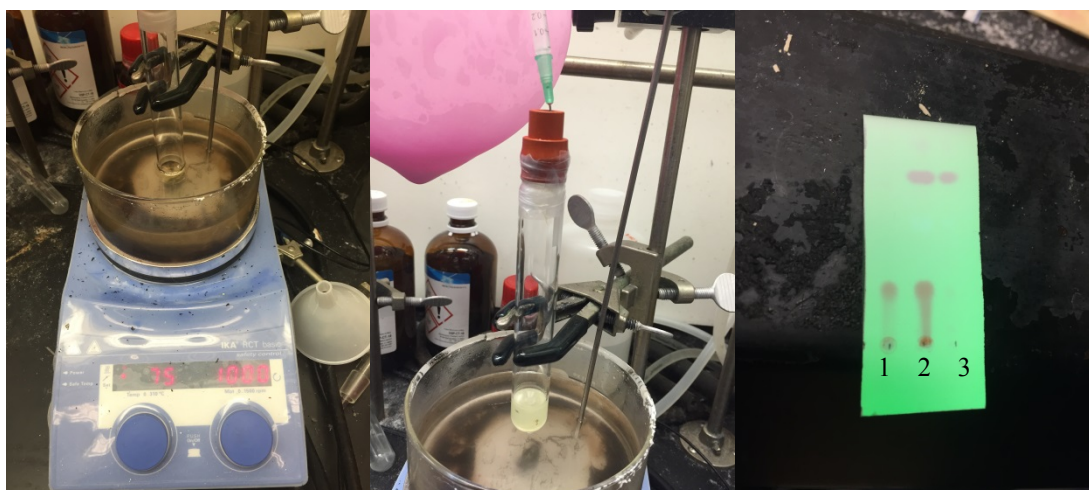

**(Left)** The vial was put in a preheated 75 °C oil bath. **(Center)** After heating for 30 min. **(Right)** TLC (hexanes/EtOAc 2:1) under UV indicates completion of the redox-active ester formation. Lane 1: starting material of *N*-hydroxy-tetrachlorophthalimide; Lane 2: co-spot of starting material and reaction mixture; Lane 3: reaction mixture.

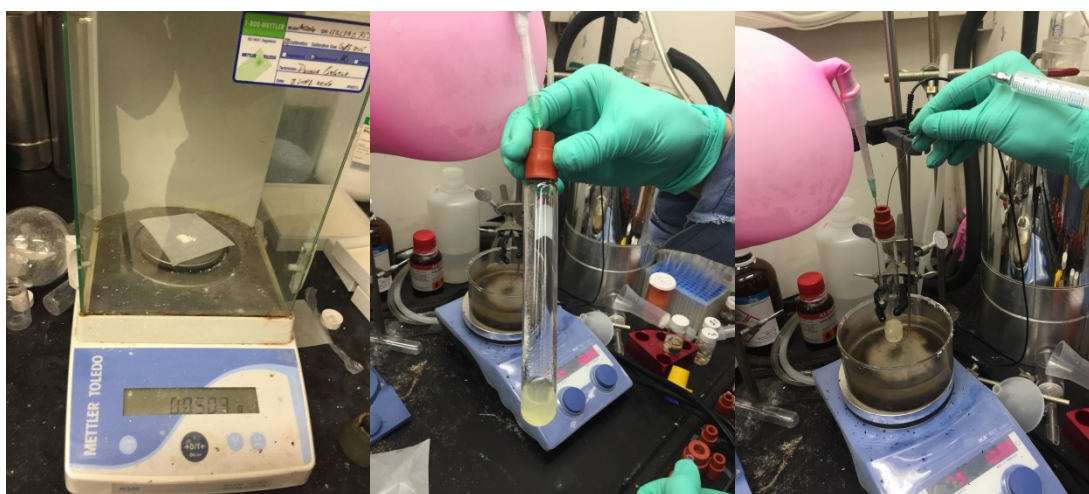

**(Left)** 4-Acyl phenyl boronic acid. **(Center)** Add 4-Acyl phenyl boronic acid to reaction mixture quickly. **(Right)** Add 1,4-dioxane (1 mL) for rinse.

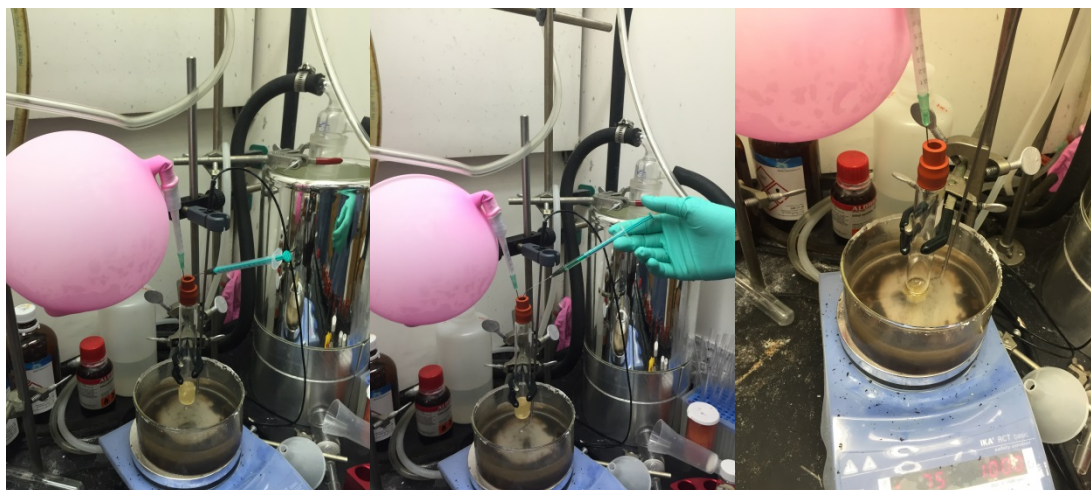

**(Left)** Add  $\text{Et}_3\text{N}$  (0.14 mL). **(Center)** Add  $\text{NiCl}_2 \cdot 6\text{H}_2\text{O}$ /bathophenanthroline stock solution (0.4 mL). **(Right)** Place the vial in a preheated  $75^\circ\text{C}$  oil bath immediately.

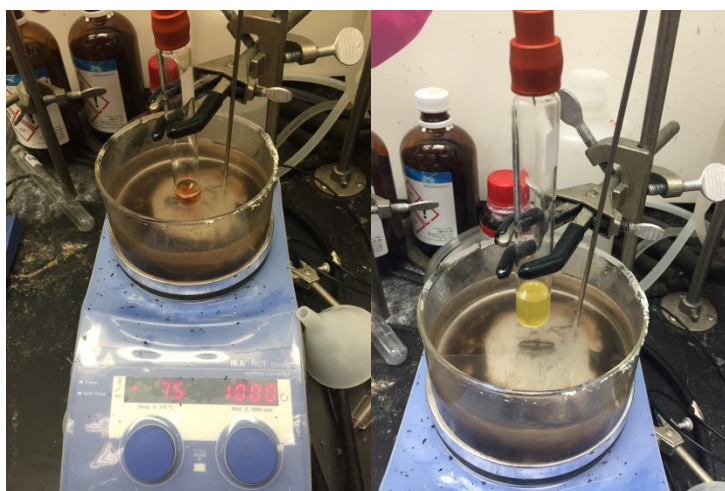

**(Left)** After heating for 5 min, the reaction mixture turned red. **(Right)** Reaction mixture after stirring for 12 hours.

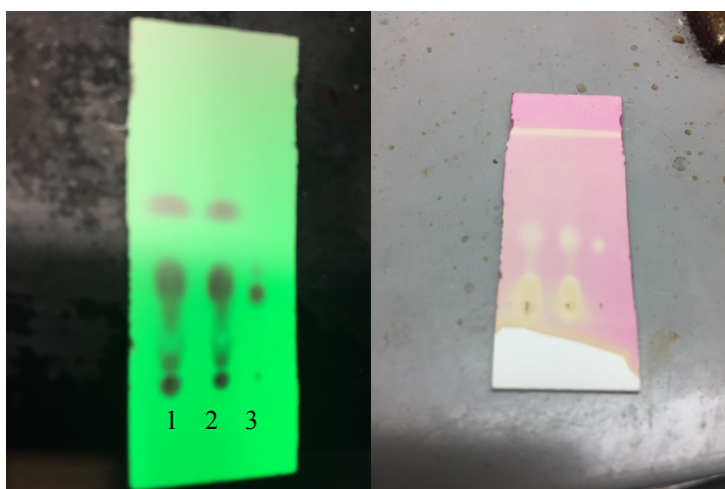

**(Left)** TLC under UV (hexanes/ $\text{EtOAc}$  5:1), Lane 1: reaction mixture; Lane 2: co-spot; Lane 3: desired product. **(Right)** The same TLC after  $\text{KMnO}_4$  stain.



## Examples of *In Situ* Cross-Coupling of Alkyl Carboxylic Acids and Aryl Boronic Acids

We demonstrated this *in situ* cross-coupling of alkyl acids and aryl boronic acids with 10 examples based on *General Procedure D*.

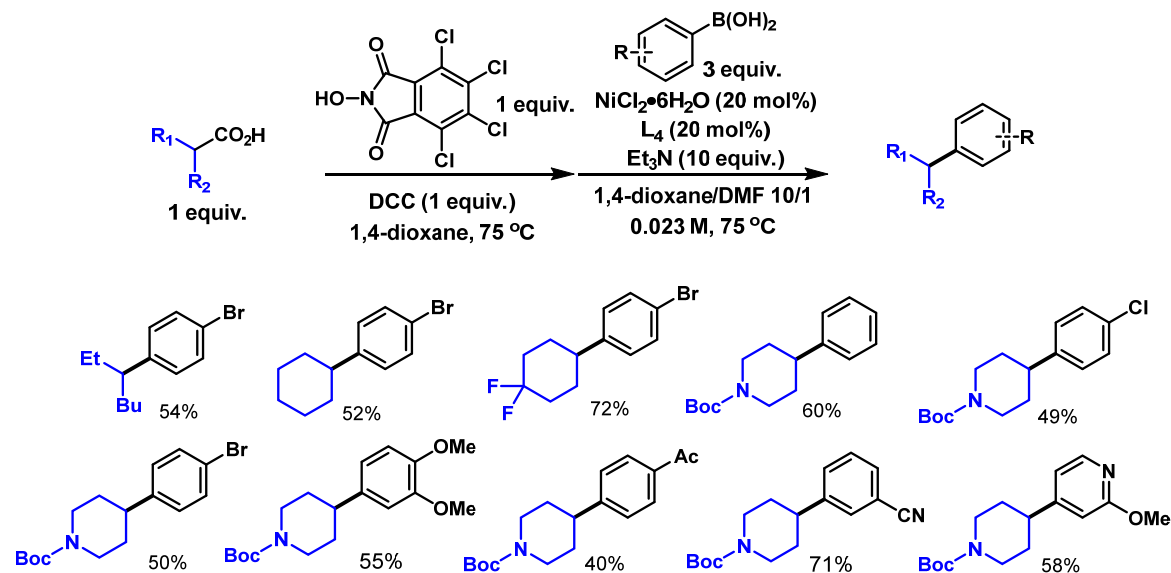

## Troubleshooting: Frequently Asked Questions

### Part I. Redox-Active Ester Synthesis

#### Question 1:

I am trying to get high-resolution mass spec data for my redox-active ester, but I am having trouble. What do I do?

#### Answer:

For these types of compounds, obtaining HRMS data by ESI is difficult. We normally rely heavily on  $^1\text{H}$  and  $^{13}\text{C}$  NMR data to determine if we have the correct compound. If necessary, a crystal structure can typically be obtained for most redox-active esters.

#### Question 2:

Can you use DCC or EDC-HCl or other common coupling reagents like HATU/PyBOP etc. to synthesis the TCNHPI redox-active esters?

#### Answer:

We occasionally used DCC or EDC-HCl and they gave similar yields while we never tried HATU/PyBOP.

For other questions regarding synthesis, purification, characterization, stability and storage of the redox-active ester, please address to our previous paper<sup>2</sup> for fully-detailed answers.

### Part II. Nickel-Catalyzed Cross-Coupling

#### Question 1:

Have you tried any other nickel sources for this reaction?

#### Answer:

During our initial screening, we tried several nickel sources, such as  $\text{NiCl}_2\cdot\text{glyme}$ ,  $\text{NiBr}_2$ ,  $\text{NiI}_2$ ,  $\text{Ni}(\text{OTf})_2$ ,  $\text{Ni}(\text{acac})_2$  etc. As soon as we realized  $\text{NiCl}_2\cdot 6\text{H}_2\text{O}$  worked well for this reaction, we focused the optimization to  $\text{NiCl}_2\cdot 6\text{H}_2\text{O}$ . When we finally came up with the best solvent (1,4-dioxane/DMF 10/1), we did not re-screen the nickel

sources due to the inexpensive nature of NiCl<sub>2</sub>•6H<sub>2</sub>O (\$9.5/mol).

**Question 2:**

How do you monitor the reactions?

**Answer:**

We monitor the reactions by a combination of TLC (and appropriate staining or UV visualization), GC/MS, and LC/MS. For smaller molecules, GC/MS typically shows the formation of the product. For compounds containing basic nitrogen atoms, LC/MS works well. *N*-Boc-4-piperidyl derivatives on LC/MS typically shows [M+1], [M-99] (de-Boc), or very rarely [M-55] (de-*t*Bu of Boc).

**Question 3:**

Do I need a glovebox to run this reaction?

**Answer:**

We do not set up or run the reaction in a glovebox. A glovebox is not necessary to run this reaction. We usually did degas-refill three times for the culture tube before adding 1,4-dioxane. We don't degas for the solvents or Et<sub>3</sub>N. You also don't need to be very cautious of water. As mentioned in the *Zero-Precaution Setup* section, we can even setup and run the reaction open-flask and see basically no erosion in yield.

**Question 4:**

Is it necessary to purify the boronic acids used in this reaction?

**Answer:**

It is not necessary to purify the boronic acids before running the reaction. We directly use the commercial boronic acids without any purification. However, we recommend to analyze the boronic acids by <sup>1</sup>H NMR to make sure it is the boronic acid itself rather than the corresponding hydrate or something else. Low levels of hydrate in the boronic acids don't affect the reaction much, but elevated amount of water could lead to a diminished yield due to competing hydrolysis of the redox-active ester (See *Water Addition Experiment* for more details).

**Question 5:**

Can the reaction be run only in 1,4-dioxane, or is the DMF cosolvent necessary?

**Answer:**

It is detrimental to the yield if the reaction is only run in 1,4-dioxane.

**Question 6:**

Is it necessary to run the reaction for a 12 hours period, or can I quench it sooner?

**Answer:**

The reaction can be stopped sooner if there is complete consumption of the redox-active ester starting material. The best way to determine if the starting material has been completely consumed is by TLC analysis with a co-spot of the reaction mixture and starting material.

**Question 7:**

The catalyst solution precipitates, can I still use it?

**Answer:**

We sometimes observe precipitation of the catalyst solution after placing for some time, especially for  $\text{NiCl}_2 \cdot 6\text{H}_2\text{O}$ /bathophenanthroline. We don't use it any more after it precipitates.

**Question 8:**

Are there any indicative color changes during the reaction?

**Answer:**

We often observe that the reaction mixture becomes red upon heating. After a long period of 12 hours, the mixture typically turns to a green or yellow color.

**Question 9:**

How do I work up the reaction?

**Answer:**

We work up the reaction by diluting the reaction with  $\text{Et}_2\text{O}$  or  $\text{EtOAc}$ . We then wash

the organic layer with 0.1 M HCl, water, and brine. For acid-sensitive substrates, the 0.1 M HCl wash is omitted and only water and brine wash are used. The organic layer is then dried and concentrated on a rotary evaporator. The crude product often contains solids that are tetrachlorophthalimide byproducts, which can be easily removed by flash column chromatography.

**Question 10:**

How do I purify my product?

**Answer:**

We use both silica gel flash column chromatography and PTLC. Reverse-phase HPLC can be used for very polar compounds.

**Question 11:**

How do I determine which redox-active ester to use?

**Answer:**

It is necessary to use the *N*-hydroxy-tetrachlorophthalimide ester for this reaction.

**Question 12:**

What other possible byproducts could be observed in this reaction?

**Answer:**

We occasionally observed the decarboxylated product, ester formation, and arylation on 1,4-dioxane.

**Question 13:**

Can I use other coupling reagent instead of DCC in the *in situ* cross coupling?

**Answer:**

The cross coupling is not working at all while using HATU, PyBOP or T3P as coupling reagent. We recommend to use diimide-type coupling reagent, among which DCC can get a better yield than DIC.

**Question 14:**

Is the *in situ* cross coupling procedure general to every substrate?

**Answer:**

So far the *in situ* procedure is working for every substrate we tried and we believe it's general. However, the yields dropped up to 30% for some substrates. We recommend to try the cross coupling reaction with isolated redox-active ester when the *in situ* procedure gives you a low yield.

**Question 15:**

I obtained the product, but the yield is not satisfactory for my purposes. What do you recommend I try to optimize the reaction?

**Answer:**

For optimization, we recommend the following:

1. Try heating the reaction at temperatures higher than 75 °C. We found empirically that primary alkyl substrates perform better at 85 °C.
2. Make sure that the internal temperature of the reaction is the desired temperature. This is particularly important on larger scale.
3. Check the quality of boronic acid. We find that most boronic acids are contaminated with their hydrate. As mentioned in *Question 4* and *Water Addition Experiment*, low levels of hydrate in the boronic acids do not affect this reaction much, but elevated amount of water could lead to a diminished yield due to competing hydrolysis of the redox-active ester.
4. Add more equivalents of boronic acid.
5. Try different bipyridine- or phenanthroline-type ligands. We found that bathophenanthroline works quite well for some of our substrates (**8**, **11**, **27**) as well as the *in situ* cross-coupling from alkyl acids.
6. Try a higher loading of Ni precatalyst.

**Question 16:** Do you have some examples of "hydrolytically labile" activated esters in the discussion of limitations?

**Answer:** As seen below, the cross coupling yields with redox-active esters **A**, **B**, **C** are 90%, 81% and 22% respectively. The major byproducts we obtained were the corresponding alkyl carboxylic acids. We assume the relative stability of redox-active esters is  $A > B > C$ . We believe the electron-withdrawing nature of Ts and Bz contributes to hydrolytic lability but we can't rule out that a downstream process after interaction with the Ni-catalyst is also responsible for this trend. In addition, compounds **D** and **E** also give very low yield of coupling product with the corresponding acid as the major byproduct.

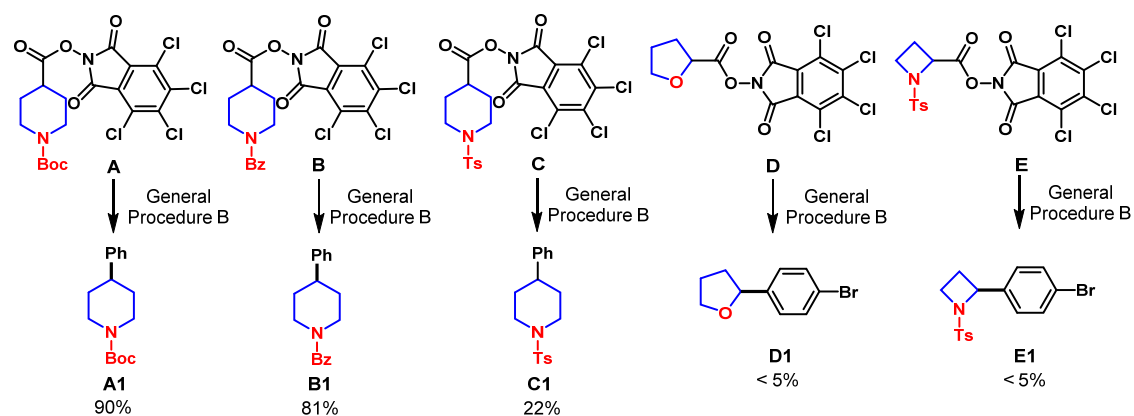

## Experimental Procedures and Characterization Data for Redox-Active Esters

### Compound S1

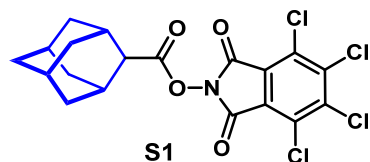

#### *4,5,6,7-Tetrachloro-1,3-dioxoisindolin-2-yl adamantane-2-carboxylate (S1)*

Following the General Procedure A on 1.0 mmol scale. Purification by flash column chromatography (silica gel, CH<sub>2</sub>Cl<sub>2</sub>) and recrystallized from CH<sub>2</sub>Cl<sub>2</sub>/MeOH afforded 223 mg (48%) of the title compound **S1**.

**Physical State:** colorless needles. **m.p.** 193-196 °C.

**R<sub>f</sub>** = 0.4 (15:1 hexanes:EtOAc).

**<sup>1</sup>H NMR (600 MHz, CDCl<sub>3</sub>):** δ 3.08 (p, *J* = 2.0 Hz, 1H), 2.48 (q, *J* = 2.9 Hz, 2H), 2.11 – 2.05 (m, 2H), 1.99 – 1.89 (m, 4H), 1.87 – 1.81 (m, 2H), 1.80 – 1.76 (m, 2H), 1.75 – 1.69 (m, 2H).

**<sup>13</sup>C NMR (151 MHz, CDCl<sub>3</sub>):** δ 170.15, 158.03, 141.07, 130.53, 124.97, 47.61, 37.95, 37.22, 33.26, 29.86, 27.34, 27.22.

**HRMS (ESI-TOF):** High resolution mass spectroscopic data could not be obtained for this compound.

### Compound S2

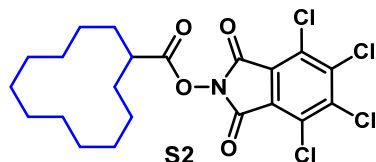

#### *4,5,6,7-Tetrachloro-1,3-dioxoisindolin-2-yl cyclododecanecarboxylate (S2)*

Following the General Procedure A on 1.0 mmol scale. Purification by flash column chromatography (silica gel, CH<sub>2</sub>Cl<sub>2</sub>) and recrystallized from CH<sub>2</sub>Cl<sub>2</sub>/MeOH afforded 306 mg (62%) of the title compound **S2**.

**Physical State:** off-white solid. **m.p.** 159-161 °C.



$R_f = 0.6$  (15:1 hexanes:EtOAc).

$^1\text{H NMR}$  (600 MHz,  $\text{CDCl}_3$ ):  $\delta$  2.93 – 2.85 (m, 1H), 1.85 – 1.74 (m, 4H), 1.57 – 1.49 (m, 2H), 1.52 – 1.32 (m, 16H).

$^{13}\text{C NMR}$  (151 MHz,  $\text{CDCl}_3$ ):  $\delta$  172.41, 157.89, 141.11, 130.57, 124.93, 38.26, 26.81, 23.82, 23.76, 23.60, 23.48, 22.20.

**HRMS (ESI-TOF)**: High resolution mass spectroscopic data could not be obtained for this compound.

### Compound ( $\pm$ )-S3

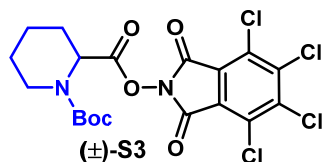

### *1-(tert-Butyl) 2-(4,5,6,7-tetrachloro-1,3-dioxoisindolin-2-yl) piperidine-1,2-dicarboxylate (( $\pm$ )-S3)*

Following the General Procedure A on 5.0 mmol scale. Purification by flash column chromatography (silica gel, 3:1:1 hexanes: $\text{CH}_2\text{Cl}_2$ :EtOAc) and recrystallized from  $\text{CH}_2\text{Cl}_2$ /MeOH afforded 1.96 g (78%) of the title compound ( $\pm$ )-S3.

**Physical State**: yellow solid. **m.p.** 180-183 °C.

$R_f = 0.4$  (6:1 hexanes:EtOAc).

Mixture of rotamers, ratio: 65%/35%.

$^1\text{H NMR}$  (600 MHz,  $\text{CDCl}_3$ ):  $\delta$  5.37 (br s, 0.35H), 5.13 (br d,  $J = 4.5$  Hz, 0.65 H), 4.07 (d,  $J = 12.6$  Hz, 0.65H), 3.97 (br d,  $J = 12.7$  Hz, 0.35H), 3.07 (t,  $J = 12.6$  Hz, 0.35H), 2.99 (t,  $J = 11.2$  Hz, 0.65H), 2.35 – 2.32 (m, 1H), 1.87 – 1.66 (m, 3H), 1.59 – 1.38 (m, 2H), 1.49 (s, 5.85H), 1.47 (s, 3.15H).

$^{13}\text{C NMR}$  (151 MHz,  $\text{CDCl}_3$ ):  $\delta$  168.53, 168.30 (minor), 157.48, 155.43 (minor), 155.07, 141.21, 130.61, 124.83, 81.29, 80.82 (minor), 53.70, 52.63 (minor), 42.27 (minor), 41.26, 28.42 (minor), 28.28, 27.31, 24.82 (minor), 24.45, 20.68 (minor), 20.36.

**HRMS (ESI-TOF)**: High resolution mass spectroscopic data could not be obtained

for this compound.

### Compound S4

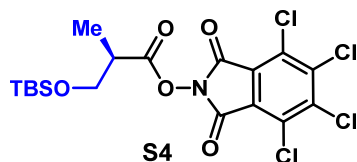

### *4,5,6,7-Tetrachloro-1,3-dioxoisindolin-2-yl (R)-3-((tert-butyldimethylsilyl)oxy)-2-methylpropanoate (S4)*

Following the General Procedure A on 1.0 mmol scale. Purification by flash column chromatography (silica gel, 5:1 hexanes:EtOAc) afforded 400 mg (63%) of the title compound S4.

**Physical State:** white solid. **m.p.** 78-80 °C.

$R_f$  = 0.50 (5:1 hexanes:EtOAc).

**$^1\text{H}$  NMR (600 MHz,  $\text{CDCl}_3$ ):**  $\delta$  3.93 (dd,  $J$  = 12.5, 9.0 Hz, 1H), 3.78 (dd,  $J$  = 12.5, 8.0 Hz, 1H), 3.06 – 2.99 (m, 1H), 1.35 (d,  $J$  = 8.5 Hz, 3H), 0.91 (s, 9H), 0.09 (s, 6H).

**$^{13}\text{C}$  NMR (151 MHz,  $\text{CDCl}_3$ ):**  $\delta$  170.78, 141.07, 130.56, 124.94, 64.50, 40.60, 25.95, 18.35, 13.67, -5.38, -5.48.

**HRMS (ESI-TOF):** calc'd for  $\text{C}_{18}\text{H}_{22}\text{Cl}_4\text{O}_5\text{Si}$   $[\text{M}+\text{H}]^+$  500.0016; found 500.0016.

$[\alpha]_D^{20}$  = -22.5 (c 1.02,  $\text{CHCl}_3$ ).

### Compound S5

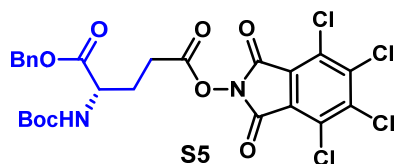

### *1-Benzyl 5-(4,5,6,7-tetrachloro-1,3-dioxoisindolin-2-yl) (tert-butoxycarbonyl)-L-glutamate (S5)*

Following the General Procedure A on 1.6 mmol scale. Purification by flash column chromatography (silica gel, 5:1 hexanes:EtOAc) afforded 462 mg (47%) of the title compound S5.

**Physical State:** white solid. **m.p.** 153-155 °C.

$R_f$  = 0.43 (4:1 hexanes:EtOAc).

**$^1\text{H}$  NMR (600 MHz,  $\text{CDCl}_3$ ):**  $\delta$  7.29 – 7.21 (m, 5H), 5.13 – 5.10 (m, 1H), 5.10 (s, 2H), 4.38 – 4.32 (m, 1H), 2.68 (ddd,  $J$  = 17.0, 9.3, 6.3 Hz, 1H), 2.59 (ddd,  $J$  = 17.0, 9.3, 6.0 Hz, 1H), 2.30 – 2.21 (m, 1H), 2.01 (dddd,  $J$  = 14.3, 9.2, 8.3, 6.0 Hz, 1H), 1.34 (s, 9H).

**$^{13}\text{C}$  NMR (151 MHz,  $\text{CDCl}_3$ ):**  $\delta$  171.56, 168.56, 157.48, 155.49, 141.18, 135.18, 130.62, 128.82, 128.74, 128.52, 124.78, 80.47, 67.67, 52.77, 28.40, 27.76, 27.41.

**HRMS (ESI-TOF):** calc'd for  $\text{C}_{25}\text{H}_{23}\text{Cl}_4\text{N}_2\text{O}_8$   $[\text{M}+\text{H}]^+$  619.0203; found 619.0203.

$[\alpha]_D^{20}$  = +3.8 (c 1.0,  $\text{CH}_2\text{Cl}_2$ ).

### Compound S6

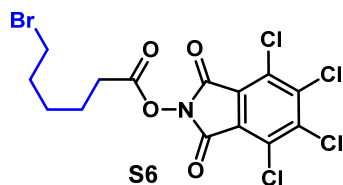

#### *4,5,6,7-tetrachloro-1,3-dioxoisindolin-2-yl 6-bromohexanoate*

Following the General Procedure A on 5 mmol scale. Purification by flash column chromatography (silica gel,  $\text{CH}_2\text{Cl}_2$ ) and recrystallized from  $\text{CH}_2\text{Cl}_2/\text{MeOH}$  afforded 1.50 g (63%) of the title compound **S6**.

**Physical State:** yellowish solid. **m.p.** 77-78 °C.

$R_f$  = 0.53 (7:1 hexanes:EtOAc).

**$^1\text{H}$  NMR (600 MHz,  $\text{CDCl}_3$ ):**  $\delta$  3.43 (t,  $J$  = 6.7 Hz, 2H), 2.70 (t,  $J$  = 7.4 Hz, 2H), 1.95-1.90 (m, 2H), 1.85-1.80 (m, 2H), 1.66 – 1.57 (m, 2H).

**$^{13}\text{C}$  NMR (151 MHz,  $\text{CDCl}_3$ ):**  $\delta$  169.02, 157.68, 141.19, 130.63, 124.83, 33.25, 32.32, 30.88, 27.44, 24.03.

**HRMS (ESI-TOF):** High resolution mass spectroscopic data could not be obtained for this compound.

Characterization of other TCNHPI esters employed in this paper are fully described in literature<sup>1,2</sup>.

## Experimental Procedures and Characterization Data for Cross-Coupling Products

### Compound 3

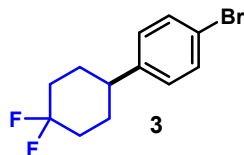

#### *1-Bromo-4-(4,4-difluorocyclohexyl)benzene (3)*

Following the General Procedure B on 0.1 mmol scale with di-*t*Bubipy (**L1**) as ligand at 75 °C. Purification by PTLC (silica gel, 50:1 hexanes:EtOAc) afforded 21.5 mg (78%) of the title compound **3**.

**Physical State:** white solid. **m.p.** 71-72 °C.

$R_f$  = 0.5 (15:1 hexanes:EtOAc).

**<sup>1</sup>H NMR (600 MHz, CDCl<sub>3</sub>):** δ 7.45 – 7.40 (m, 2H), 7.13 – 7.07 (m, 2H), 2.56 (dt,  $J$  = 12.2, 3.3 Hz, 1H), 2.23 – 2.18 (m, 2H), 1.94 – 1.83 (m, 3H), 1.86 – 1.72 (m, 3H).

**<sup>13</sup>C NMR (151 MHz, CDCl<sub>3</sub>):** δ 144.29, 131.74, 128.65, 123.11 (dd,  $J$  = 242.4, 239.9 Hz, 1C), 121.51, 42.17, 34.12 (dd,  $J$  = 26.0, 23.3 Hz, 2C), 30.32 (d,  $J$  = 10.0 Hz, 2C).

**<sup>19</sup>F NMR (376 MHz, CDCl<sub>3</sub>):** δ -92.07 (d,  $J$  = 236.9 Hz), -102.67 (d,  $J$  = 236.9 Hz).

**MS (GCMS, EI):**  $m/z$  = 274 (25%), 195 (20%), 116 (100%), 91 (27%), 77 (25%).

### Compound 4

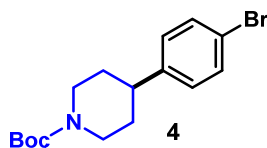

#### *tert-Butyl 4-(4-bromophenyl)piperidine-1-carboxylate (4)*

Following the General Procedure B on 0.1 mmol scale with di-*t*Bubipy (**L1**) as ligand at 75 °C. Purification by PTLC (silica gel, 10:1 hexanes:EtOAc) afforded 23.8 mg (70%) of the title compound **4**.

**Physical State:** white solid. **m.p.** 41-42 °C.

$R_f$  = 0.50 (10:1 hexanes:EtOAc).

**<sup>1</sup>H NMR (600 MHz, CDCl<sub>3</sub>):** δ 7.45 – 7.39 (m, 2H), 7.10 – 7.04 (m, 2H), 4.24 (br s, 2H), 2.80 – 2.77 (m, 2H), 2.60 (tt, *J* = 12.2, 3.6 Hz, 1H), 1.79 (d, *J* = 13.1 Hz, 2H), 1.65 – 1.54 (m, 2H), 1.48 (s, 9H).

**<sup>13</sup>C NMR (151 MHz, CDCl<sub>3</sub>):** δ 154.94, 144.88, 131.69, 128.67, 120.12, 79.66, 44.35 (br), 42.36, 33.21, 28.62.

Spectroscopic data matches that reported in the literature.<sup>3</sup>

### Compound 5

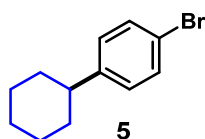

#### *1-Bromo-4-cyclohexylbenzene (5)*

Following the General Procedure B on 0.1 mmol scale with di-*t*Bubipy (**L1**) as ligand at 75 °C. Purification by PTLC (silica gel, pentane) afforded 16.7 mg (70%) of the title compound **5**.

**Physical State:** colorless oil.

*R<sub>f</sub>* = 0.70 (pentane).

**<sup>1</sup>H NMR (600 MHz, CDCl<sub>3</sub>):** δ 7.42 – 7.37 (m, 2H), 7.11 – 7.05 (m, 2H), 2.48 – 2.43 (m, 1H), 1.89 – 1.79 (m, 4H), 1.79 – 1.71 (m, 1H), 1.45 – 1.32 (m, 4H), 1.30 – 1.19 (m, 1H).

**<sup>13</sup>C NMR (151 MHz, CDCl<sub>3</sub>):** δ 147.16, 131.42, 128.75, 119.46, 44.20, 34.50, 26.93, 26.20.

Spectroscopic data matches that reported in the literature.<sup>4</sup>

### Compound 6

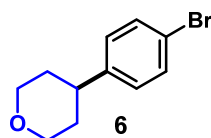

#### *4-(4-Bromophenyl)tetrahydro-2H-pyran (6)*

Following the General Procedure B on 0.1 mmol scale with di-*t*Bubipy (**L1**) as ligand

at 75 °C. Purification by PTLC (silica gel, 6:1 hexanes:EtOAc) afforded 20.8 mg (86%) of the title compound **6**.

**Physical State:** white solid. **m.p.** 61-62 °C.

$R_f$  = 0.50 (4:1 hexanes:EtOAc).

**<sup>1</sup>H NMR (600 MHz, CDCl<sub>3</sub>):** δ 7.46 – 7.40 (m, 2H), 7.12 – 7.07 (m, 2H), 4.19 – 4.06 (m, 2H), 3.51 (td,  $J$  = 11.5, 2.8 Hz, 2H), 2.72 (tt,  $J$  = 11.3, 4.6 Hz, 1H), 1.83 – 1.70 (m, 4H).

**<sup>13</sup>C NMR (151 MHz, CDCl<sub>3</sub>):** δ 144.93, 131.67, 128.63, 120.09, 68.38, 41.20, 33.93.

**HRMS (ESI-TOF):** calc'd for C<sub>11</sub>H<sub>14</sub>BrO [M+H]<sup>+</sup> 241.0222; found 241.0223.

### Compound 7

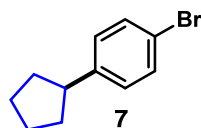

#### *1-Bromo-4-(cyclopentyl)benzene (7)*

Following the General Procedure B on 0.1 mmol scale with di-*t*Bubipy (**L1**) as ligand at 75 °C. Purification by PTLC (silica gel, pentane) afforded 11.0 mg (49%) of the title compound **7**.

**Physical State:** colorless oil.

$R_f$  = 0.6 (pentane).

**<sup>1</sup>H NMR (600 MHz, CDCl<sub>3</sub>):** δ 7.42 – 7.36 (m, 2H), 7.14 – 7.08 (m, 2H), 2.94 (tt,  $J$  = 9.8, 7.5 Hz, 1H), 2.10 – 2.01 (m, 2H), 1.84 – 1.75 (m, 2H), 1.73 – 1.64 (m, 2H), 1.59 – 1.49 (m, 2H).

**<sup>13</sup>C NMR (151 MHz, CDCl<sub>3</sub>):** δ 145.65, 131.36, 129.02, 119.36, 45.53, 34.70, 25.60.

**MS (GCMS, EI):** m/z = 224 (40%), 182 (35%), 145 (100%), 116 (90%), 91 (75%).

### Compound 8

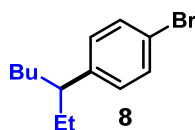

### ***1-Bromo-4-(heptan-3-yl)benzene (8)***

Following the General Procedure B on 0.1 mmol scale with bathophenanthroline (**L4**) as ligand at 75 °C. Purification by PTLC (silica gel, 50:1 hexanes:EtOAc) afforded 17.8 mg (70%) of the title compound **8**.

**Physical State:** colorless oil.

$R_f$  = 0.9 (50:1 hexanes:EtOAc).

**$^1\text{H}$  NMR (600 MHz,  $\text{CDCl}_3$ ):**  $\delta$  7.40 (d,  $J$  = 8.5, 2H), 7.01 (d,  $J$  = 8.0, 2H), 2.39 – 2.33 (m, 1H), 1.70 – 1.59 (m, 2H), 1.54 – 1.45 (m, 2H), 1.31 – 1.19 (m, 2H), 1.18 – 1.02 (m, 2H), 0.83 (t,  $J$  = 7.5 Hz, 3H), 0.75 (t,  $J$  = 7.5 Hz, 3H).

**$^{13}\text{C}$  NMR (151 MHz,  $\text{CDCl}_3$ ):**  $\delta$  145.23, 131.37, 129.65, 119.46, 47.54, 36.29, 29.91, 29.77, 22.88, 14.14, 12.24.

**MS (GCMS, EI):**  $m/z$  = 254 (20%), 225 (25%), 197 (42%), 169 (100%), 118 (28%).

### **Compound 9**

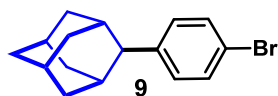

### ***2-(4-Bromophenyl)adamantane (9)***

Following the General Procedure B on 0.1 mmol scale with di-*t*Bubipy (**L1**) as ligand at 75 °C. Purification by PTLC (silica gel, pentane) afforded 14.3 mg (49%) of the title compound **9**.

**Physical State:** white solid. **m.p.** 41-42 °C.

$R_f$  = 0.7 (pentane).

**$^1\text{H}$  NMR (600 MHz,  $\text{CDCl}_3$ ):**  $\delta$  7.45 – 7.41 (m, 2H), 7.24 – 7.21 (m, 2H), 2.94 (br s, 1H), 2.42 (br s, 2H), 2.04 – 1.95 (m, 3H), 1.96 – 1.89 (m, 2H), 1.80 – 1.76 (m, 5H), 1.57 – 1.54 (m, 2H).

**$^{13}\text{C}$  NMR (151 MHz,  $\text{CDCl}_3$ ):**  $\delta$  143.57, 131.29, 128.89, 119.03, 46.54, 39.17, 37.92, 32.00, 31.11, 28.11, 27.78.

Spectroscopic data matches that reported in the literature.<sup>5</sup>

## Compound 10

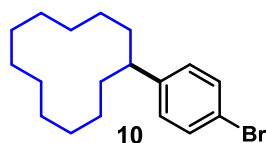

### *(4-Bromophenyl)cyclododecane (10)*

Following the General Procedure B on 0.1 mmol scale with di-*t*Bubipy (**L1**) as ligand at 75 °C. Purification by PTLC (silica gel, hexanes) afforded 23.5 mg (73%) of the title compound **10**.

**Physical State:** white solid. **m.p.** 58-59 °C.

$R_f$  = 0.9 (hexanes).

**<sup>1</sup>H NMR (600 MHz, CDCl<sub>3</sub>):** δ 7.41 – 7.36 (m, 2H), 7.09 – 7.04 (m, 2H), 2.72 (p,  $J$  = 6.4 Hz, 1H), 1.81 – 1.74 (m, 2H), 1.51 – 1.22 (m, 20H).

**<sup>13</sup>C NMR (151 MHz, CDCl<sub>3</sub>):** δ 146.77, 131.33, 129.56, 119.37, 39.41, 31.62, 24.07, 23.96, 23.56, 23.34, 22.75.

**MS (GCMS, EI):**  $m/z$  = 324 (50%), 243 (50%), 182 (100%), 171 (95%), 131 (70%), 117 (70%), 55 (55%).

## Compound 11

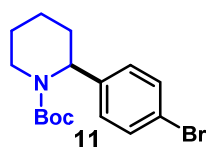

### *tert-Butyl-2-(4-bromophenyl)piperidine-1-carboxylate (11)*

Following the General Procedure B on 0.1 mmol scale with bathophenanthroline (**L4**) as ligand at 85 °C. Purification by PTLC (silica gel, 10:1 hexanes:EtOAc) afforded 13.6 mg (40%) of the title compound **11**.

**Physical State:** colorless oil.

$R_f$  = 0.40 (10:1 hexanes:EtOAc).

**<sup>1</sup>H NMR (500 MHz, CDCl<sub>3</sub>):** δ 7.46 (d,  $J$  = 8.5, 2H), 7.09 (d,  $J$  = 9.0, 2H), 5.34 (br s, 1H), 4.04 (d,  $J$  = 14.0 Hz, 1H), 2.72 (dt,  $J$  = 13.0, 3.5 Hz, 1H), 2.23 (d,  $J$  = 16.5 Hz, 1H), 1.92 – 1.84 (m, 1H), 1.62 – 1.56 (m, 2H), 1.53 – 1.48 (m, 1H), 1.46 (s, 9H), 1.42



– 1.36 (m, 1H).

$^{13}\text{C}$  NMR (151 MHz,  $\text{CDCl}_3$ ):  $\delta$  155.70, 139.80, 131.75, 128.51, 120.38, 79.92, 53.05, 40.26, 28.56, 28.23, 25.49, 19.42.

HRMS (ESI-TOF): calc'd for  $\text{C}_{16}\text{H}_{23}\text{BrNO}_2$   $[\text{M}+\text{H}]^+$  340.0907; found 340.0910.

### Compound 12

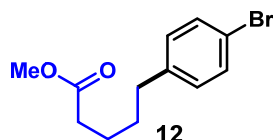

#### *Methyl 5-(4-bromophenyl)pentanoate (12)*

Following the General Procedure B on 0.1 mmol scale with di-*t*Bubipy (**L1**) as ligand at 85 °C. Purification by PTLC (silica gel, 10:1 hexanes:EtOAc) afforded 17.4 mg (54%) of the title compound **12**.

**Physical State:** colorless oil.

$R_f$  = 0.65 (10:1 hexanes:EtOAc).

$^1\text{H}$  NMR (600 MHz,  $\text{CDCl}_3$ ):  $\delta$  7.39 (d,  $J$  = 8.3 Hz, 2H), 7.04 (d,  $J$  = 8.0 Hz, 2H), 3.66 (s, 3H), 2.58 (t,  $J$  = 7.1 Hz, 2H), 2.33 (t,  $J$  = 6.9 Hz, 2H), 1.69 – 1.60 (m, 4H).

$^{13}\text{C}$  NMR (151 MHz,  $\text{CDCl}_3$ ):  $\delta$  174.09, 141.16, 131.50, 130.28, 119.64, 51.67, 35.10, 33.99, 30.83, 24.58.

Spectroscopic data matches that reported in the literature.<sup>6</sup>

### Compound 13

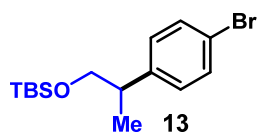

#### *(2-(4-Bromophenyl)propoxy)(tert-butyl)dimethylsilane (13)*

Following the General Procedure B on 0.1 mmol scale with di-*t*Bubipy (**L1**) as ligand at 75 °C. Purification by PTLC (silica gel, 50:1 hexanes:EtOAc) afforded 25.7 mg (78%) of the title compound **13**.

**Physical State:** colorless oil.

$R_f = 0.50$  (50:1 hexanes:EtOAc).

$^1\text{H NMR}$  (500 MHz,  $\text{CDCl}_3$ ):  $\delta$  7.40 (d,  $J = 10.0$  Hz, 2H), 7.09 (d,  $J = 10.0$  Hz, 2H), 3.65 – 3.55 (m, 2H), 2.90 – 2.81 (m, 1H), 1.24 (d,  $J = 8.5$  Hz, 3H), 0.85 (s, 9H), -0.04 (s, 3H), -0.05 (s, 3H).

$^{13}\text{C NMR}$  (151 MHz,  $\text{CDCl}_3$ ):  $\delta$  143.77, 131.31, 129.52, 120.01, 69.01, 42.07, 26.00, 18.37, 17.47, -5.38.

**HRMS (ESI-TOF)**: calc'd for  $\text{C}_{15}\text{H}_{26}\text{BrOSi}$   $[\text{M}+\text{H}]^+$  329.0931; found 329.0930.

$[\alpha]_D^{20} = 0$  (c 1.0,  $\text{CHCl}_3$ ).

### Compound 14

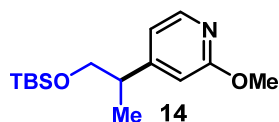

#### *4-(1-(tert-Butyldimethylsilyloxy)propan-2-yl)-2-methoxypyridine (14)*

Following the General Procedure B on 0.1 mmol scale with di-*t*Bubipy (**L1**) as ligand at 75 °C. Purification by PTLC (silica gel, 15:1 hexanes:EtOAc) afforded 22.9 mg (81%) of the title compound **14**.

**Physical State**: colorless oil.

$R_f = 0.50$  (15:1 hexanes:EtOAc).

$^1\text{H NMR}$  (500 MHz,  $\text{CDCl}_3$ ):  $\delta$  8.05 (d,  $J = 5.0$  Hz, 2H), 6.74 (dd,  $J = 5.0, 1.5$  Hz, 2H), 6.59 (s, 1H), 3.92 (s, 3H), 3.68 – 3.58 (m, 2H), 2.87 – 2.80 (m, 1H), 1.24 (d,  $J = 7.0$  Hz, 1H), 0.84 (s, 9H), -0.03 (s, 3H), -0.04 (s, 3H).

$^{13}\text{C NMR}$  (151 MHz,  $\text{CDCl}_3$ ):  $\delta$  164.57, 156.65, 146.51, 116.86, 109.73, 68.32, 53.43, 42.00, 25.97, 18.40, 16.87, -5.38.

**HRMS (ESI-TOF)**: calc'd for  $\text{C}_{15}\text{H}_{28}\text{BrNO}_2\text{Si}$   $[\text{M}+\text{H}]^+$  282.1884; found 282.1885.

$[\alpha]_D^{20} = 0$  (c 1.0,  $\text{CHCl}_3$ ).

## Compound 15

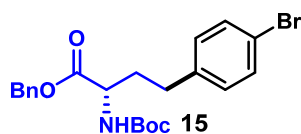

### *Benzyl (S)-4-(4-bromophenyl)-2-((tert-butoxycarbonyl)amino)butanoate (15)*

Following the General Procedure B on 0.1 mmol scale with di-*t*Bubipy (**L1**) as ligand at 75 °C. Purification by PTLC (silica gel, 6:1 hexanes:EtOAc) afforded 22.9 mg (51%) of the title compound **15**.

**Physical State:** colorless oil.

$R_f$  = 0.24 (10:1 hexanes:EtOAc).

**<sup>1</sup>H NMR (600 MHz, CDCl<sub>3</sub>):** δ 7.39 – 7.33 (m, 7H), 6.99 – 6.95 (m, 2H), 5.19 (d,  $J$  = 12.3 Hz, 1H), 5.12 (d,  $J$  = 12.3 Hz, 1H), 5.08 (d,  $J$  = 8.4 Hz, 1H), 4.41 – 4.34 (m, 1H), 2.60 (ddd,  $J$  = 13.9, 10.2, 6.3 Hz, 1H), 2.53 (ddd,  $J$  = 14.3, 10.1, 5.6 Hz, 1H), 2.18 – 2.07 (m, 1H), 1.96 – 1.85 (m, 1H), 1.45 (s, 9H).

**<sup>13</sup>C NMR (151 MHz, CDCl<sub>3</sub>):** δ 172.45, 155.41, 139.85, 135.43, 131.63, 130.29, 128.78, 128.66, 128.53, 120.03, 80.16, 67.27, 53.31, 34.38, 31.08, 28.45.

**HRMS (ESI-TOF):** calc'd for C<sub>22</sub>H<sub>27</sub>BrNO<sub>4</sub> [M+H]<sup>+</sup> 448.1118; found 448.1118.

$[\alpha]_D^{20}$  = +6.8 (c 1.0, CH<sub>2</sub>Cl<sub>2</sub>).

## Compound 16

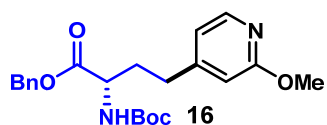

### *Benzyl (S)-2-((tert-butoxycarbonyl)amino)-4-(2-methoxypyridin-4-yl)butanoate (16)*

Following the General Procedure B on 0.1 mmol scale with di-*t*Bubipy (**L1**) as ligand at 75 °C. Purification by PTLC (silica gel, 4:1 hexanes:EtOAc) afforded 18.2 mg (45%) of the title compound **16** as a pure enantiomer indicated by chiral HPLC.

**Physical State:** colorless oil.

$R_f$  = 0.21 (4:1 hexanes:EtOAc).

**<sup>1</sup>H NMR (600 MHz, CDCl<sub>3</sub>):** δ 8.03 (d,  $J$  = 5.2 Hz, 1H), 7.39 – 7.32 (m, 5H), 6.62

(dd,  $J = 5.3, 1.5$  Hz, 1H), 6.49 (dd,  $J = 1.5, 0.8$  Hz, 1H), 5.20 (d,  $J = 12.2$  Hz, 1H), 5.13 (d,  $J = 12.5$  Hz, 1H), 5.10 (s, 1H), 4.39 (d,  $J = 6.9$  Hz, 1H), 3.90 (s, 3H), 2.58 (ddd,  $J = 14.0, 10.4, 6.1$  Hz, 1H), 2.51 (ddd,  $J = 14.4, 10.3, 5.5$  Hz, 1H), 2.18 – 2.08 (m, 1H), 1.96 – 1.87 (m, 1H), 1.44 (s, 9H).

$^{13}\text{C}$  NMR (151 MHz,  $\text{CDCl}_3$ ):  $\delta$  172.30, 164.67, 155.40, 152.65, 146.88, 135.36, 128.80, 128.71, 128.54, 117.40, 110.40, 80.23, 67.35, 53.45, 53.31, 33.30, 30.87, 28.43.

HRMS (ESI-TOF): calc'd for  $\text{C}_{22}\text{H}_{29}\text{N}_2\text{O}_5$   $[\text{M}+\text{H}]^+$  401.2071; found 401.2071.

$[\alpha]_{\text{D}}^{20} = +6.4^\circ$  (c 1.0,  $\text{CH}_2\text{Cl}_2$ ).

>99% *ee*. HPLC conditions: OZ3 Column, isocratic 90:10 (Hexane:*i*PrOH), 25 °C, 1.0 mL/min, UV detection, 254 nm.

#### For cross-coupling product 16:

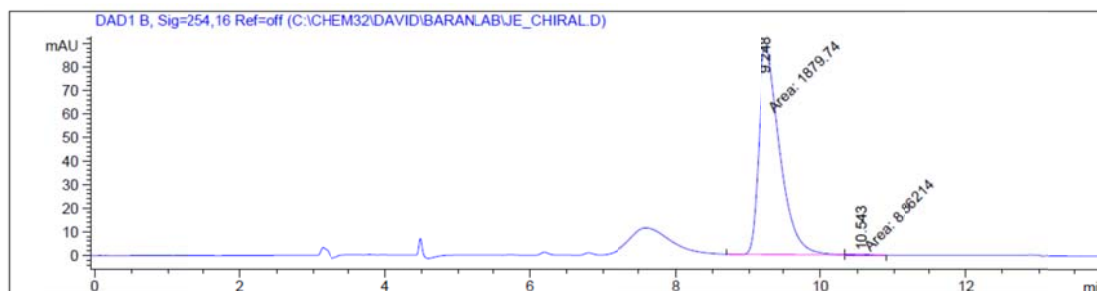

Signal 2: DAD1 B, Sig=254,16 Ref=off

| Peak # | RetTime [min] | Type | Width [min] | Area [mAU*s] | Height [mAU] | Area %  |
|--------|---------------|------|-------------|--------------|--------------|---------|
| 1      | 9.248         | MF   | 0.3563      | 1379.73682   | 87.92305     | 99.5308 |
| 2      | 10.543        | MF   | 0.3807      | 8.86214      | 3.87956e-1   | 0.4692  |

Totals : 1388.59895 88.31101

For racemic sample of ( $\pm$ )-16:

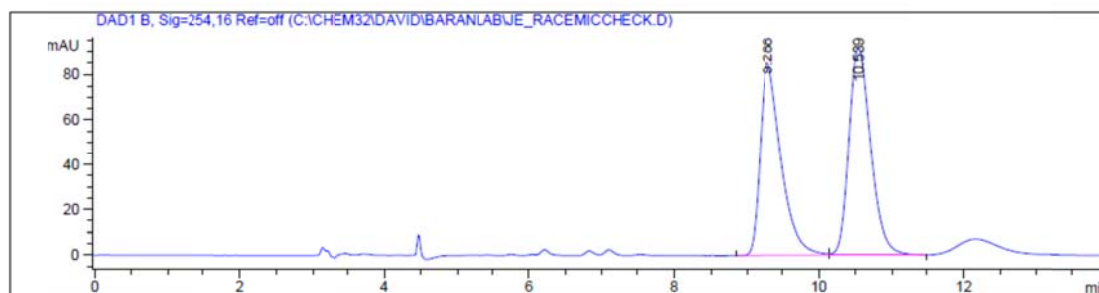

Signal 2: DAD1 B, Sig=254,16 Ref=off

| Peak # | RetTime [min] | Type | Width [min] | Area [mAU*s] | Height [mAU] | Area %  |
|--------|---------------|------|-------------|--------------|--------------|---------|
| 1      | 9.288         | BV   | 0.3238      | 1826.38696   | 85.29803     | 49.0379 |
| 2      | 10.539        | VV   | 0.3193      | 1898.05225   | 91.75673     | 50.9621 |

Totals : 3724.43921 177.05476

### Compound 17

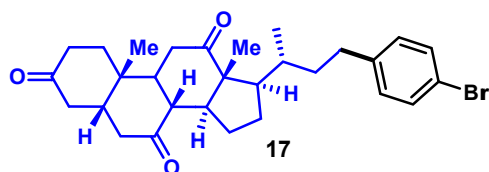

*(5S,8R,10S,13R,14S,17R)-17-((R)-4-(4-Bromophenyl)butan-2-yl)-10,13-dimethyldecahydro-3H-cyclopenta[a]phenanthrene-3,7,12(2H,4H)-trione (17)*

Following the General Procedure B on 0.05 mmol scale with di-*t*Bubipy (**L1**) as ligand at 85 °C. Purification by PTLC (silica gel, 50:1 CH<sub>2</sub>Cl<sub>2</sub>:MeOH) afforded 15.5 mg (60%) of the title compound **17**.

**Physical State:** white solid. **m.p.** 200-202 °C.

**R<sub>f</sub>** = 0.6 (20:1 CH<sub>2</sub>Cl<sub>2</sub>:MeOH).

**<sup>1</sup>H NMR (600 MHz, CDCl<sub>3</sub>):**  $\delta$  7.42 – 7.35 (m, 2H), 7.07 – 7.01 (m, 2H), 2.93 – 2.83 (m, 3H), 2.68 (ddd,  $J$  = 13.7, 10.7, 4.9 Hz, 1H), 2.44 (ddd,  $J$  = 13.7, 10.4, 6.5 Hz, 1H), 2.36 – 2.20 (m, 6H), 2.16 – 1.94 (m, 6H), 1.85 (td,  $J$  = 11.1, 7.1 Hz, 1H), 1.71 (dddd,  $J$  = 13.5, 10.6, 6.5, 2.8 Hz, 1H), 1.61 (td,  $J$  = 14.4, 4.7 Hz, 2H), 1.40 (s, 3H), 1.32 – 1.22 (m, 3H), 1.05 (s, 3H), 0.92 (d,  $J$  = 6.7 Hz, 3H).

**<sup>13</sup>C NMR (151 MHz, CDCl<sub>3</sub>):**  $\delta$  212.16, 209.18, 208.87, 142.14, 131.46, 130.26,

119.39, 57.05, 51.93, 49.15, 46.99, 45.81, 45.73, 45.12, 42.93, 38.79, 37.45, 36.63, 36.15, 35.81, 35.42, 32.46, 27.92, 25.29, 22.06, 19.04, 11.99.

**HRMS (ESI-TOF):** calc'd for C<sub>29</sub>H<sub>38</sub>BrO<sub>3</sub> [M+H]<sup>+</sup> 513.1999; found 513.1998.

[ $\alpha$ ]<sub>D</sub><sup>20</sup> = +13.0 (c 1.04, CHCl<sub>3</sub>).

### Compound 18

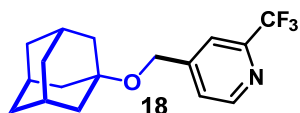

#### 4-(((1-Adamantan-1-yl)oxy)methyl)-2-(trifluoromethyl)pyridine (**18**)

Following the General Procedure B on 0.1 mmol scale with di-*t*Bubipy (**L1**) as ligand at 85 °C. Purification by PTLC (silica gel, 4:1 hexanes:EtOAc) afforded 18.0 mg (58%) of the title compound **18**.

**Physical State:** colorless oil.

$R_f$  = 0.41 (4:1 hexanes:EtOAc).

**<sup>1</sup>H NMR (600 MHz, CDCl<sub>3</sub>):**  $\delta$  8.65 (d,  $J$  = 4.9 Hz, 1H), 7.68 (s, 1H), 7.48 (d,  $J$  = 4.5 Hz, 1H), 4.60 (s, 2H), 2.26 – 2.17 (m, 3H), 1.83 (d,  $J$  = 3.0 Hz, 6H), 1.68 (d,  $J$  = 12.1 Hz, 3H), 1.62 (d,  $J$  = 12.1 Hz, 3H).

**<sup>13</sup>C NMR (151 MHz, CDCl<sub>3</sub>):**  $\delta$  151.89, 149.89, 148.30 (q,  $J$  = 34.2 Hz), 124.42, 120.80 (q,  $J$  = 123.2 Hz), 118.65 (q,  $J$  = 2.6 Hz), 73.72, 60.64, 41.72, 36.49, 30.68.

**<sup>19</sup>F NMR (376 MHz, CDCl<sub>3</sub>):**  $\delta$  -68.27.

**HRMS (ESI-TOF):** calc'd for C<sub>17</sub>H<sub>21</sub>F<sub>3</sub>NO [M+H]<sup>+</sup> 312.1570; found 312.1671.

### Compound 19

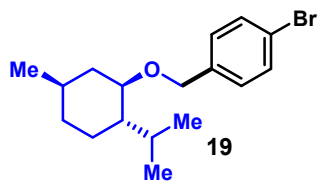

#### 1-Bromo-4-(((1*R*,2*S*,5*R*)-2-isopropyl-5-methylcyclohexyl)oxy)methylbenzene (**19**)

Following the General Procedure B on 0.1 mmol scale with di-*t*Bubipy (**L1**) as ligand at 85 °C. Purification by PTLC (silica gel, 10:1 hexanes:EtOAc) afforded 17.4 mg (54%)

of the title compound **19**.

**Physical State:** colorless oil.

$R_f = 0.70$  (10:1 hexanes:EtOAc).

**$^1\text{H NMR}$  (600 MHz,  $\text{CDCl}_3$ ):**  $\delta$  7.47 – 7.43 (m, 2H), 7.24 – 7.20 (m, 2H), 4.60 (d,  $J = 11.7$  Hz, 1H), 4.34 (d,  $J = 11.7$  Hz, 1H), 3.16 (td,  $J = 10.6, 4.2$  Hz, 1H), 2.26 (pd,  $J = 7.0, 2.8$  Hz, 1H), 2.16 (dtd,  $J = 12.1, 3.8, 1.9$  Hz, 1H), 1.68 – 1.60 (m, 2H), 1.41 – 1.32 (m, 1H), 1.31 – 1.24 (m, 1H), 1.01 – 0.82 (m, 3H), 0.94 (d,  $J = 6.6$  Hz, 3H), 0.90 (d,  $J = 7.1$  Hz, 3H), 0.72 (d,  $J = 6.9$  Hz, 3H).

**$^{13}\text{C NMR}$  (151 MHz,  $\text{CDCl}_3$ ):**  $\delta$  138.35, 131.52, 129.55, 121.33, 79.13, 69.77, 48.46, 40.43, 34.69, 31.71, 25.73, 23.41, 22.52, 21.15, 16.25.

$[\alpha]_D^{20} = -68.7$  (c 1.0,  $\text{CH}_2\text{Cl}_2$ ).

Spectroscopic data matches that reported in the literature.<sup>7</sup>

### Compound **20**

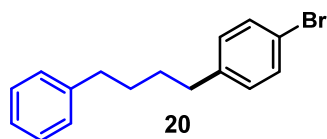

### *1-Bromo-4-(4-phenylbutyl)benzene (20)*

Following the General Procedure B on 0.1 mmol scale with di-*t*Bubipy (**L1**) as ligand at 85 °C. Purification by PTLC (silica gel, hexanes) afforded 18.5 mg (64%) of the title compound **20**.

**Physical State:** colorless oil.

$R_f = 0.8$  (hexanes).

**$^1\text{H NMR}$  (600 MHz,  $\text{CDCl}_3$ ):**  $\delta$  7.42 – 7.37 (m, 2H), 7.29 (dd,  $J = 8.3, 6.8$  Hz, 2H), 7.23 – 7.15 (m, 3H), 7.07 – 7.02 (m, 2H), 2.66 – 2.63 (m, 2H), 2.61 – 2.59 (m, 2H), 1.67 (m, 4H).

**$^{13}\text{C NMR}$  (151 MHz,  $\text{CDCl}_3$ ):**  $\delta$  142.51, 141.59, 131.42, 131.40, 130.30, 128.42, 125.85, 119.49, 35.89, 35.32, 31.07, 31.00.

**MS (GCMS, EI):**  $m/z = 288$  (16%), 171 (19%), 131 (30%), 117 (21%), 91 (100%).

## Compound 21

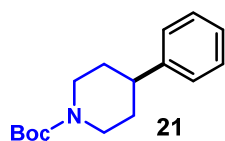

### *tert-Butyl 4-phenylpiperidine-1-carboxylate (21)*

Following the General Procedure B on 0.1 mmol scale with di-*t*Bubipy (**L1**) as ligand at 75 °C. Purification by PTLC (silica gel, 10:1 hexanes:EtOAc) afforded 23.6 mg (90%) of the title compound **21**.

**Physical State:** colorless oil.

$R_f$  = 0.50 (10:1 hexanes:EtOAc).

**<sup>1</sup>H NMR (600 MHz, CDCl<sub>3</sub>):** δ 7.31 (dd,  $J$  = 8.5, 7.0 Hz, 2H), 7.24 – 7.18 (m, 3H), 4.25 (br s, 2H), 2.80 (t,  $J$  = 10.2 Hz, 2H), 2.64 (tt,  $J$  = 12.2, 3.6 Hz, 1H), 1.85 – 1.79 (m, 2H), 1.68 – 1.57 (m, 2H), 1.49 (s, 9H).

**<sup>13</sup>C NMR (151 MHz, CDCl<sub>3</sub>):** δ 155.01, 145.94, 128.64, 126.91, 126.47, 79.57, 44.50 (br), 42.87, 33.33, 28.64.

Spectroscopic data matches that reported in the literature.<sup>8</sup>

## Compound 22

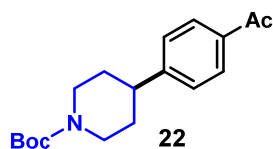

### *tert-Butyl 4-(4-acetylphenyl)piperidine-1-carboxylate (22)*

Following the General Procedure B on 0.1 mmol scale with di-*t*Bubipy (**L1**) as ligand at 75 °C. Purification by PTLC (silica gel, 50:1 CH<sub>2</sub>Cl<sub>2</sub>:MeOH) afforded 20.5 mg (68%) of the title compound **22**.

**Physical State:** colorless oil.

$R_f$  = 0.60 (3:1 hexanes:EtOAc).

**<sup>1</sup>H NMR (600 MHz, CDCl<sub>3</sub>):** δ 7.93 – 7.88 (m, 2H), 7.32 – 7.27 (m, 2H), 4.26 (br s, 2H), 2.82 – 2.79 (m, 2H), 2.71 (tt,  $J$  = 12.3, 3.6 Hz, 1H), 2.58 (s, 3H), 1.85 – 1.79 (m, 2H), 1.66 – 1.58 (m, 2H), 1.48 (s, 9H).



<sup>13</sup>C NMR (151 MHz, CDCl<sub>3</sub>): δ 197.89, 154.94, 151.44, 135.66, 128.85, 127.16, 79.73, 44.36 (br), 42.94, 32.99, 28.62, 26.71.

Spectroscopic data matches that reported in the literature.<sup>9</sup>

### Compound 23

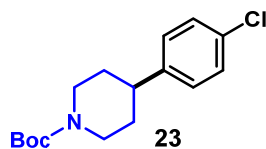

#### *tert-Butyl 4-(4-chlorophenyl)piperidine-1-carboxylate (23)*

Following the General Procedure B on 0.1 mmol scale with di-*t*Bubipy (**L1**) as ligand at 75 °C. Purification by PTLC (silica gel, 10:1 hexanes:EtOAc) afforded 23.7 mg (80%) of the title compound **23**.

**Physical State:** colorless oil.

*R<sub>f</sub>* = 0.50 (10:1 hexanes:EtOAc).

<sup>1</sup>H NMR (600 MHz, CDCl<sub>3</sub>): δ 7.28 – 7.26 (m, 2H), 7.15 – 7.10 (m, 2H), 4.24 (br s, 2H), 2.79 (br t, *J* = 13.0 Hz, 2H), 2.62 (tt, *J* = 12.2, 3.6 Hz, 1H), 1.79 (d, *J* = 13.7 Hz, 2H), 1.57 (qd, *J* = 12.7, 4.4 Hz, 2H), 1.48 (s, 9H).

<sup>13</sup>C NMR (151 MHz, CDCl<sub>3</sub>): δ 154.96, 144.35, 132.10, 128.74, 128.26, 79.66, 44.39 (br), 42.29, 33.28, 28.62.

Spectroscopic data matches that reported in the literature.<sup>3</sup>

### Compound 24

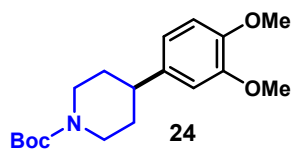

#### *tert-Butyl 4-(3,4-dimethoxyphenyl)piperidine-1-carboxylate (24)*

Following the General Procedure B on 0.1 mmol scale with di-*t*Bubipy (**L1**) as ligand at 75 °C. Purification by PTLC (silica gel, 50:1 CH<sub>2</sub>Cl<sub>2</sub>:MeOH) afforded 19.4 mg (60%) of the title compound **24**.

**Physical State:** colorless oil.

$R_f = 0.40$  (4:1 hexanes:EtOAc).

$^1\text{H NMR}$  (600 MHz,  $\text{CDCl}_3$ ):  $\delta$  6.81 (d,  $J = 8.1$  Hz, 1H), 6.77 – 6.71 (m, 2H), 4.24 (br s, 2H), 3.87 (s, 3H), 3.86 (s, 3H), 2.79 (br t,  $J = 11.9$  Hz, 2H), 2.59 (tt,  $J = 12.2$ , 3.6 Hz, 1H), 1.81 (d,  $J = 13.0$  Hz, 2H), 1.64 – 1.56 (m, 2H), 1.48 (s, 9H).

$^{13}\text{C NMR}$  (151 MHz,  $\text{CDCl}_3$ ):  $\delta$  155.01, 149.03, 147.61, 138.75, 118.58, 111.40, 110.32, 79.58, 56.06, 55.98, 44.52 (br), 42.49, 33.58, 28.63.

**HRMS (ESI-TOF):** calc'd for  $\text{C}_{18}\text{H}_{28}\text{NO}_4$   $[\text{M}+\text{H}]^+$  322.2013; found 322.2013.

### Compound 25

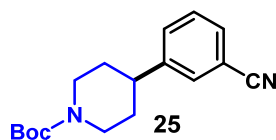

#### *tert-Butyl 4-(3-cyanophenyl)piperidine-1-carboxylate (25)*

Following the General Procedure B on 0.1 mmol scale with di-*t*Bubipy (**L1**) as ligand at 75 °C. Purification by PTLC (silica gel, 50:1  $\text{CH}_2\text{Cl}_2$ :MeOH) afforded 20.3 mg (71%) of the title compound **25**.

**Physical State:** colorless oil.

$R_f = 0.35$  (4:1 hexanes:EtOAc).

$^1\text{H NMR}$  (600 MHz,  $\text{CDCl}_3$ ):  $\delta$  7.54 – 7.47 (m, 2H), 7.47 – 7.36 (m, 2H), 4.26 (br s, 2H), 2.82 – 2.78 (m, 2H), 2.68 (tt,  $J = 12.2$ , 3.6 Hz, 1H), 1.81 (d,  $J = 13.1$  Hz, 2H), 1.59 (qd,  $J = 12.6$ , 4.4 Hz, 2H), 1.48 (s, 9H).

$^{13}\text{C NMR}$  (151 MHz,  $\text{CDCl}_3$ ):  $\delta$  154.86, 147.20, 131.52, 130.65, 130.28, 129.47, 119.05, 112.70, 79.80, 44.19 (br), 42.48, 33.00, 28.59.

**HRMS (ESI-TOF):** calc'd for  $\text{C}_{17}\text{H}_{23}\text{N}_2\text{O}_2$   $[\text{M}+\text{H}]^+$  287.1754; found 287.1755.

### Compound 26

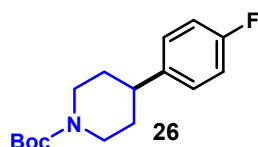

#### *tert-Butyl 4-(4-fluorophenyl)piperidine-1-carboxylate (26)*

Following the General Procedure B on 0.1 mmol scale with di-*t*Bubipy (**L1**) as ligand at 75 °C. Purification by PTLC (silica gel, 10:1 hexanes:EtOAc) afforded 21.0 mg (75%) of the title compound **26**.

**Physical State:** colorless oil.

$R_f$  = 0.5 (10:1 hexanes:EtOAc).

**<sup>1</sup>H NMR (600 MHz, CDCl<sub>3</sub>):** δ 7.18 – 7.11 (m, 2H), 7.03 – 6.95 (m, 2H), 4.24 (d,  $J$  = 13.2 Hz, 2H), 2.79 (td,  $J$  = 13.0, 2.5 Hz, 2H), 2.62 (tt,  $J$  = 12.2, 3.6 Hz, 1H), 1.83 – 1.76 (m, 2H), 1.61 – 1.54 (m, 2H), 1.48 (s, 9H).

**<sup>13</sup>C NMR (151 MHz, CDCl<sub>3</sub>):** δ 161.53 (d,  $J$  = 244.4 Hz), 154.97, 141.59 (d,  $J$  = 3.0 Hz), 128.22 (d,  $J$  = 7.5 Hz), 115.35 (d,  $J$  = 21.1 Hz), 79.63, 44.48 (br), 42.14, 33.50, 28.62.

**<sup>19</sup>F NMR (376 MHz, CDCl<sub>3</sub>):** δ -116.51.

Spectroscopic data matches that reported in the literature.<sup>9</sup>

### Compound 27

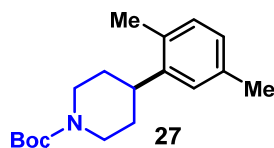

### *tert*-Butyl 4-(2,5-dimethylphenyl)piperidine-1-carboxylate (**27**)

Following the General Procedure B on 0.1 mmol scale with bathophenanthroline (**L4**) as ligand at 75 °C. Purification by PTLC (silica gel, 10:1 hexanes:EtOAc) afforded 15.0 mg (52%) of the title compound **27**.

**Physical State:** colorless oil.

$R_f$  = 0.5 (10:1 hexanes:EtOAc).

**<sup>1</sup>H NMR (600 MHz, CDCl<sub>3</sub>):** δ 7.04 (d,  $J$  = 7.6 Hz, 1H), 6.99 (d,  $J$  = 1.9 Hz, 1H), 6.93 (dd,  $J$  = 7.6, 1.8 Hz, 1H), 4.26 (br s, 2H), 2.84 – 2.79 (m, 3H), 2.30 (s, 6H), 1.75 – 1.72 (m, 2H), 1.65 – 1.58 (m, 2H), 1.49 (s, 9H).

**<sup>13</sup>C NMR (151 MHz, CDCl<sub>3</sub>):** δ 155.01, 143.57, 135.77, 132.04, 130.44, 126.82, 126.36, 79.54, 44.78 (br), 38.46, 32.59, 28.65, 21.31, 19.03.

**HRMS (ESI-TOF):** calc'd for C<sub>18</sub>H<sub>28</sub>NO<sub>2</sub> [M+H]<sup>+</sup> 290.2114; found 290.2114.

## Compound 28

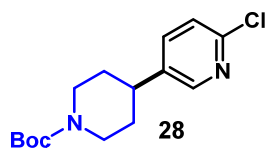

### *tert-Butyl 4-(6-chloropyridin-3-yl)piperidine-1-carboxylate (28)*

Following the General Procedure B on 0.1 mmol scale with di-*t*Bubipy (**L1**) as ligand at 75 °C. Purification by PTLC (silica gel, 4:1 hexanes:EtOAc) afforded 15.6 mg (53%) of the title compound **28**.

**Physical State:** colorless oil.

$R_f$  = 0.32 (4:1 hexanes:EtOAc);

**<sup>1</sup>H NMR (600 MHz, CDCl<sub>3</sub>):** δ 8.24 (d,  $J$  = 2.5 Hz, 1H), 7.47 (dd,  $J$  = 8.2, 2.6 Hz, 1H), 7.27 (d,  $J$  = 7.4 Hz, 1H), 4.37 – 4.16 (m, 2H), 2.86 – 2.73 (m, 2H), 2.67 (tt,  $J$  = 12.3, 3.6 Hz, 1H), 1.81 (d,  $J$  = 13.0 Hz, 2H), 1.59 (qd,  $J$  = 12.3, 4.0 Hz, 2H), 1.47 (s, 9H).

**<sup>13</sup>C NMR (151 MHz, CDCl<sub>3</sub>):** δ 154.85, 149.62, 148.65, 139.90, 137.14, 124.27, 79.86, 44.28 (br), 39.72, 32.95, 28.60.

**HRMS (ESI-TOF):** calc'd for C<sub>15</sub>H<sub>21</sub>ClN<sub>2</sub>O<sub>2</sub> [M+H]<sup>+</sup> 297.1364; found 297.1366.

## Compound 29

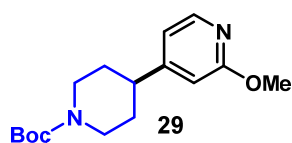

### *tert-Butyl 4-(2-methoxypyridin-4-yl)piperidine-1-carboxylate (29)*

Following the General Procedure B on 0.1 mmol scale with di-*t*Bubipy (**L1**) as ligand at 75 °C. Purification by PTLC (silica gel, 4:1 hexanes:EtOAc) afforded 16.3 mg (56%) of the title compound **29**.

**Physical State:** colorless oil.

$R_f$  = 0.41 (4:1 hexanes:EtOAc);

**<sup>1</sup>H NMR (600 MHz, CDCl<sub>3</sub>):** δ 8.06 (dd,  $J$  = 5.4, 0.7 Hz, 1H), 6.71 (dd,  $J$  = 5.5, 1.5 Hz, 1H), 6.58 – 6.54 (m, 1H), 4.35 – 4.13 (m, 2H), 3.91 (s, 3H), 2.85 – 2.72 (m, 2H),

2.59 (tt,  $J = 12.2, 3.6$  Hz, 1H), 1.80 (d,  $J = 13.2$  Hz, 2H), 1.62 – 1.53 (m, 2H), 1.47 (s, 9H).

$^{13}\text{C}$  NMR (151 MHz,  $\text{CDCl}_3$ ):  $\delta$  164.75, 157.36, 154.89, 146.97, 115.96, 108.85, 79.73, 53.49, 44.06 (br), 42.05, 32.32, 28.59.

HRMS (ESI-TOF): calc'd for  $\text{C}_{16}\text{H}_{24}\text{N}_2\text{O}_3$   $[\text{M}+\text{H}]^+$  293.1860; found 293.1860.

### Compound 30

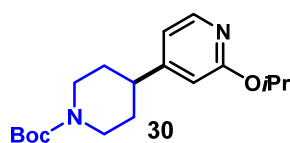

#### *tert-Butyl 4-(2-isopropoxy-pyridin-4-yl)piperidine-1-carboxylate (30)*

Following the General Procedure B on 0.1 mmol scale with di-*t*Bubipy (**L1**) as ligand at 75 °C. Purification by PTLC (silica gel, 8:1 hexanes:EtOAc) afforded 15.2 mg (47%) of the title compound **30**.

**Physical State:** colorless oil.

$R_f = 0.50$  (4:1 hexanes:EtOAc).

$^1\text{H}$  NMR (600 MHz,  $\text{CDCl}_3$ ):  $\delta$  8.04 (d,  $J = 5.3$  Hz, 1H), 6.66 (dd,  $J = 5.4, 1.6$  Hz, 1H), 6.53 – 6.47 (m, 1H), 5.28 (hept,  $J = 6.2$  Hz, 1H), 4.41 – 4.08 (m, 2H), 2.85 – 2.67 (m, 2H), 2.57 (ddd,  $J = 12.2, 8.6, 3.6$  Hz, 1H), 1.80 (d,  $J = 13.1$  Hz, 2H), 1.62 – 1.52 (m, 2H), 1.47 (s, 9H), 1.33 (d,  $J = 6.2$  Hz, 6H).

$^{13}\text{C}$  NMR (151 MHz,  $\text{CDCl}_3$ ):  $\delta$  164.07, 157.31, 146.98, 115.54, 109.51, 79.71, 67.96, 44.55 (br), 42.06, 32.32, 28.61, 28.59, 22.25.

HRMS (ESI-TOF): calc'd for  $\text{C}_{16}\text{H}_{24}\text{N}_2\text{O}_3$   $[\text{M}+\text{H}]^+$  293.1860; found 293.1860.

### Compound 31

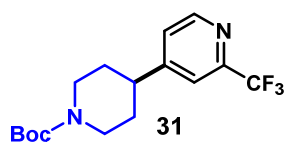

#### *tert-Butyl 4-(2-(trifluoromethyl)-pyridin-4-yl)piperidine-1-carboxylate (31)*

Following the General Procedure B on 0.1 mmol scale with di-*t*Bubipy (**L1**) as ligand

at 75 °C. Purification by PTLC (silica gel, 6:1 hexanes:EtOAc) afforded 18.7 mg (57%) of the title compound **31**.

**Physical State:** colorless oil.

$R_f$  = 0.27 (4:1 hexanes:EtOAc).

**$^1\text{H}$  NMR (600 MHz,  $\text{CDCl}_3$ ):**  $\delta$  8.63 (d,  $J$  = 5.0 Hz, 1H), 7.55 – 7.48 (m, 1H), 7.32 (dd,  $J$  = 5.0, 1.6 Hz, 1H), 4.28 (s, 2H), 2.81 (s, 2H), 2.75 (tt,  $J$  = 12.0, 3.6 Hz, 1H), 1.85 (d,  $J$  = 13.0 Hz, 2H), 1.63 (qd,  $J$  = 12.6, 4.4 Hz, 2H), 1.47 (s, 9H).

**$^{13}\text{C}$  NMR (151 MHz,  $\text{CDCl}_3$ ):**  $\delta$  156.51, 154.78, 150.33, 148.67 (q,  $J$  = 34.2 Hz), 124.92, 121.71 (q,  $J$  = 247.6 Hz), 119.17 (q,  $J$  = 2.4 Hz), 79.96, 43.95 (br), 42.26, 32.32, 28.58.

**$^{19}\text{F}$  NMR (376 MHz,  $\text{CDCl}_3$ ):**  $\delta$  -68.26.

**HRMS (ESI-TOF):** calc'd for  $\text{C}_{16}\text{H}_{22}\text{F}_3\text{N}_2\text{O}_2$   $[\text{M}+\text{H}]^+$  331.1628; found 331.1630.

### Compound 32

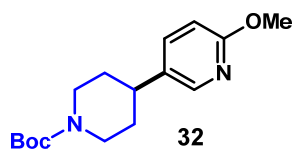

### *tert-butyl 4-(6-methoxypyridin-3-yl)piperidine-1-carboxylate (32)*

Following the General Procedure B on 0.1 mmol scale with di-*t*Bubipy (**L1**) as ligand at 75 °C. Purification by PTLC (silica gel, 4:1 hexanes:EtOAc) afforded 12.3 mg (42%) of the title compound **32**.

**Physical State:** colorless oil.

$R_f$  = 0.46 (silica gel, 4:1 hexanes:EtOAc);

**$^1\text{H}$  NMR (600 MHz,  $\text{CDCl}_3$ ):**  $\delta$  8.00 (d,  $J$  = 2.4 Hz, 1H), 7.41 (dd,  $J$  = 8.5, 2.5 Hz, 1H), 6.70 (d,  $J$  = 8.4 Hz, 1H), 4.24 (br s, 2H), 3.92 (s, 3H), 2.79 (br s, 2H), 2.61 (tt,  $J$  = 12.2, 3.6 Hz, 1H), 1.78 (d,  $J$  = 13.1 Hz, 2H), 1.57 (qd,  $J$  = 12.4, 4.3 Hz, 2H), 1.48 (s, 9H).

**$^{13}\text{C}$  NMR (151 MHz,  $\text{CDCl}_3$ ):**  $\delta$  163.12, 154.96, 145.00, 137.27, 133.78, 110.82, 79.69, 53.50, 44.35, 39.53, 33.24, 28.62.

**HRMS (ESI-TOF):** calc'd for C<sub>16</sub>H<sub>25</sub>N<sub>2</sub>O<sub>3</sub> [M+H]<sup>+</sup> 293.1860; found 293.1856.

### Compound 33

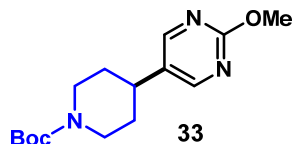

#### *tert-butyl 4-(2-methoxypyrimidin-5-yl)piperidine-1-carboxylate (33)*

Following the General Procedure B on 0.1 mmol scale with di-*t*Bubipy (**L1**) as ligand at 75 °C. Purification by PTLC (silica gel, 5:1 CH<sub>2</sub>Cl<sub>2</sub>:EtOAc) afforded 10.0 mg (34%) of the title compound **33**.

**Physical State:** colorless oil.

*R<sub>f</sub>* = 0.38 (silica gel, 5:1 CH<sub>2</sub>Cl<sub>2</sub>:EtOAc);

**<sup>1</sup>H NMR (600 MHz, CDCl<sub>3</sub>):** δ 8.37 (s, 2H), 4.26 (br s, 2H), 4.00 (s, 3H), 2.80 (br s, 2H), 2.63 (tt, *J* = 12.3, 3.6 Hz, 1H), 1.82 (d, *J* = 13.1 Hz, 2H), 1.60 (qd, *J* = 12.6, 4.3 Hz, 2H), 1.48 (s, 9H).

**<sup>13</sup>C NMR (151 MHz, CDCl<sub>3</sub>):** δ 164.84, 157.87, 154.86, 131.60, 79.90, 55.02, 44.29, 37.48, 32.92, 28.60.

**HRMS (ESI-TOF):** calc'd for C<sub>15</sub>H<sub>24</sub>N<sub>3</sub>O<sub>3</sub> [M+H]<sup>+</sup> 294.1812; found 294.1813.

### Compound 34

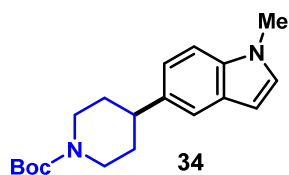

#### *tert-butyl 4-(1-methyl-1H-indol-5-yl)piperidine-1-carboxylate (34)*

Following the General Procedure B with 1-(*tert*-butyl) 4-(4,5,6,7-tetrachloro-1,3-dioxoisindolin-2-yl) piperidine-1,4-dicarboxylate (0.1 mmol) and 1-methylindole-5-boronic acid (0.5 mmol), di-*t*Bubipy (**L1**) as ligand at 75 °C. Purification by PTLC (silica gel, 10:1 hexanes:EtOAc) afforded 13.6 mg (43%) of the title compound **34**.

**Physical State:** white solid. **m.p.** 95-96 °C.

$R_f$  = 0.55 (silica gel, 7:1 hexanes:EtOAc).

**$^1\text{H}$  NMR (600 MHz,  $\text{CDCl}_3$ ):**  $\delta$  7.45 (dd,  $J$  = 1.6, 0.8 Hz, 1H), 7.28 (s, 1H), 7.09 (dd,  $J$  = 8.5, 1.7 Hz, 1H), 7.03 (d,  $J$  = 3.0 Hz, 1H), 6.43 (dd,  $J$  = 3.1, 0.9 Hz, 1H), 4.26 (d,  $J$  = 13.1 Hz, 2H), 3.77 (s, 3H), 2.83 (t,  $J$  = 12.9 Hz, 2H), 2.74 (tt,  $J$  = 12.2, 3.6 Hz, 1H), 1.87 (d,  $J$  = 12.7 Hz, 2H), 1.70 (qd,  $J$  = 12.7, 4.3 Hz, 2H), 1.50 (s, 9H).

**$^{13}\text{C}$  NMR (151 MHz,  $\text{CDCl}_3$ ):**  $\delta$  155.08, 137.06, 135.72, 129.24, 128.74, 121.06, 118.45, 109.27, 100.79, 79.46, 44.78, 42.99, 34.07, 32.99, 28.67.

**HRMS (ESI-TOF):** calc'd for  $\text{C}_{19}\text{H}_{27}\text{N}_2\text{O}_2$   $[\text{M}+\text{H}]^+$  315.2067; found 315.2066.

### Compound 35

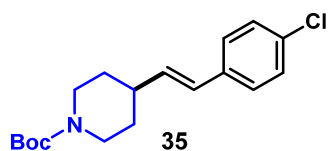

#### *tert-Butyl (E)-4-(4-chlorostyryl)piperidine-1-carboxylate (35)*

Following the General Procedure B on 0.1 mmol scale with di-*t*Bubipy (**L1**) as ligand at 75 °C. Purification by PTLC (silica gel, 10:1 hexanes:EtOAc) afforded 20.7 mg (64%) of the title compound **35**.

**Physical State:** colorless oil.

$R_f$  = 0.24 (10:1 hexanes:EtOAc).

**$^1\text{H}$  NMR (600 MHz,  $\text{CDCl}_3$ ):**  $\delta$  7.26 – 7.25 (m, 4H), 6.33 (dd,  $J$  = 16.0, 1.3 Hz, 1H), 6.12 (dd,  $J$  = 16.0, 6.9 Hz, 1H), 4.28 – 3.99 (br s, 2H), 2.87 – 2.63 (m, 2H), 2.27 (qdd,  $J$  = 7.9, 3.4, 1.3 Hz, 1H), 1.74 (d,  $J$  = 12.4 Hz, 2H), 1.47 (s, 9H), 1.42 – 1.35 (m, 2H).

**$^{13}\text{C}$  NMR (151 MHz,  $\text{CDCl}_3$ ):**  $\delta$  154.96, 136.13, 135.20, 132.78, 128.77, 127.45, 127.37, 79.53, 44.05 (br), 39.50, 31.87, 28.61.

**HRMS (ESI-TOF):** calc'd for  $\text{C}_{18}\text{H}_{24}\text{NO}_2\text{Cl}$   $[\text{M}+\text{H}]^+$  322.1568; found 322.1568.

### Compound 36

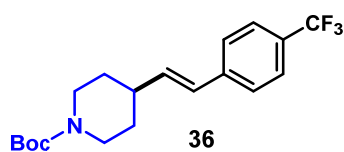



***tert-Butyl (E)-4-(4-(trifluoromethyl)styryl)piperidine-1-carboxylate (36)***

Following the General Procedure B on 0.1 mmol scale with di-*t*Bubipy (**L1**) as ligand at 75 °C. Purification by PTLC (silica gel, 10:1 hexanes:EtOAc) afforded 19.9 mg (56%) of the title compound **36**.

**Physical State:** white solid.

$R_f$  = 0.22 (10:1 hexanes:EtOAc).

**<sup>1</sup>H NMR (600 MHz, CDCl<sub>3</sub>):** δ 7.54 (d,  $J$  = 8.2 Hz, 2H), 7.42 (d,  $J$  = 8.1 Hz, 2H), 6.41 (d,  $J$  = 16.0 Hz, 1H), 6.25 (dd,  $J$  = 16.0, 6.8 Hz, 1H), 4.26 – 4.05 (m, 2H), 2.88 – 2.72 (m, 2H), 2.31 (dtd,  $J$  = 10.9, 7.0, 3.1 Hz, 1H), 1.76 (d,  $J$  = 12.6 Hz, 2H), 1.47 (s, 9H), 1.39 (qd,  $J$  = 12.3, 4.0 Hz, 2H).

**<sup>13</sup>C NMR (151 MHz, CDCl<sub>3</sub>):** δ 154.96, 141.13, 137.24, 128.06 (q,  $J$  = 32.3 Hz), 127.47, 126.31, 125.59 (q,  $J$  = 3.7 Hz), 124.37 (q,  $J$  = 271.9 Hz), 79.58, 43.83 (br), 39.57, 31.75, 28.61.

Spectroscopic data matches that reported in the literature.<sup>10</sup>

**Compound 37**

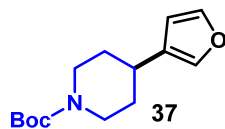

***tert-Butyl 4-(furan-3-yl)piperidine-1-carboxylate (37)***

Following the General Procedure B with 1-(*tert*-butyl) 4-(4,5,6,7-tetrachloro-1,3-dioxoisindolin-2-yl) piperidine-1,4-dicarboxylate (0.1 mmol) and 3-furyl boronic acid (0.5 mmol), di-*t*Bubipy (**L1**) as ligand at 75 °C. Purification by PTLC (silica gel, 10:1 hexanes:EtOAc) afforded 10.2 mg (41%) of the title compound **37**.

**Physical State:** colorless oil.

$R_f$  = 0.46 (10:1 hexanes:EtOAc).

**<sup>1</sup>H NMR (600 MHz, CDCl<sub>3</sub>):** δ 7.38 (t,  $J$  = 1.7 Hz, 1H), 7.25 – 7.23 (m, 1H), 6.31 (dd,  $J$  = 1.8, 0.9 Hz, 1H), 4.27 – 4.11 (m, 2H), 2.90 – 2.77 (m, 2H), 2.61 (tt,  $J$  = 11.7, 3.7 Hz, 1H), 1.89 (d,  $J$  = 12.4 Hz, 2H), 1.55 – 1.48 (m, 2H), 1.49 (s, 9H).

**<sup>13</sup>C NMR (151 MHz, CDCl<sub>3</sub>):** δ 155.00, 143.01, 137.91, 129.64, 109.51, 79.56,

44.16, 33.04, 32.66, 28.62.

Spectroscopic data matches that reported in the literature.<sup>11</sup>

### Compound 38

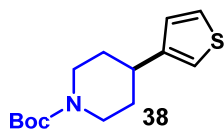

#### *tert-Butyl 4-(thiophen-3-yl)piperidine-1-carboxylate (38)*

Following the General Procedure B on 0.1 mmol scale with di-*t*Bubipy (**L1**) as ligand at 75 °C. Purification by PTLC (silica gel, 10:1 hexanes:EtOAc) afforded 11.2 mg (42%) of the title compound **38**.

**Physical State:** colorless oil.

$R_f$  = 0.46 (10:1 hexanes:EtOAc);

**<sup>1</sup>H NMR (600 MHz, CDCl<sub>3</sub>):** δ 7.28 – 7.26 (m, 1H), 6.98 (d,  $J$  = 4.9 Hz, 1H), 6.96 – 6.94 (m, 1H), 4.20 (s, 2H), 2.85 – 2.79 (m, 2H), 2.76 (tt,  $J$  = 11.9, 3.7 Hz, 1H), 1.91 (d,  $J$  = 13.1 Hz, 2H), 1.57 (qd,  $J$  = 12.7, 4.5 Hz, 2H), 1.47 (s, 9H).

**<sup>13</sup>C NMR (151 MHz, CDCl<sub>3</sub>):** δ 155.00, 146.89, 126.78, 125.63, 119.07, 79.56, 44.40 (br), 37.87, 33.15, 28.63.

**HRMS (ESI-TOF):** calc'd for C<sub>14</sub>H<sub>22</sub>NO<sub>2</sub>S [M+H]<sup>+</sup> 268.1366; found 268.1366.

### Compound 39

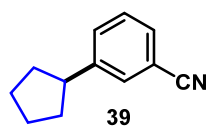

#### *3-cyclopentylbenzonitrile (39)*

Following the General Procedure B on 0.1 mmol scale with di-*t*Bubipy (**L1**) as ligand at 75 °C. Purification by PTLC (silica gel, 15:1 hexanes:EtOAc) afforded 9.5 mg (56%) of the title compound **39**.

**Physical State:** colorless oil.

$R_f$  = 0.60 (silica gel, 10:1 hexanes:EtOAc).

**<sup>1</sup>H NMR (600 MHz, CDCl<sub>3</sub>):** δ 7.52 (t, *J* = 1.8 Hz, 1H), 7.46 (dt, *J* = 8.1, 1.5 Hz, 2H), 7.37 (t, *J* = 7.7 Hz, 1H), 3.01 (tt, *J* = 9.8, 7.6 Hz, 1H), 2.14 – 2.05 (m, 2H), 1.86 – 1.78 (m, 2H), 1.77 – 1.66 (m, 2H), 1.62 – 1.52 (m, 2H).

**<sup>13</sup>C NMR (151 MHz, CDCl<sub>3</sub>):** δ 148.09, 131.93, 130.90, 129.59, 129.11, 119.38, 112.34, 45.60, 34.57, 25.58.

Spectroscopic data matches that reported in the literature.<sup>12</sup>

### Compound 40

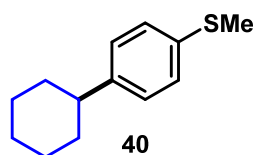

#### *(4-cyclohexylphenyl)(methyl)sulfane (40)*

Following the General Procedure B on 0.1 mmol scale with di-*t*Bubipy (**L1**) as ligand at 75 °C. Purification by PTLC (silica gel, pentane) afforded 18.8 mg (91%) of the title compound **40**.

**Physical State:** colorless solid. **m.p.** 34-35 °C.

*R<sub>f</sub>* = 0.65 (silica gel, pentane).

**<sup>1</sup>H NMR (600 MHz, CDCl<sub>3</sub>):** δ 7.23 – 7.20 (m, 2H), 7.16 – 7.12 (m, 2H), 2.49-2.45 (m, 1H), 2.47 (s, 3H), 1.89 – 1.80 (m, 4H), 1.75 (dtt, *J* = 12.7, 2.9, 1.5 Hz, 1H), 1.43-1.35 (m, 4H), 1.29 – 1.21 (m, 1H).

**<sup>13</sup>C NMR (151 MHz, CDCl<sub>3</sub>):** δ 145.49, 135.17, 127.51, 127.32, 44.20, 34.58, 27.01, 26.26, 16.54.

Spectroscopic data matches that reported in the literature.<sup>13</sup>

### Compound 41

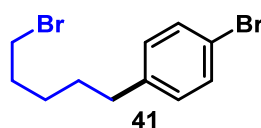

#### *1-bromo-4-(5-bromopentyl)benzene (41)*

Following the General Procedure B on 0.1 mmol scale with di-*t*Bubipy (**L1**) as ligand

at 85 °C. Purification by PTLC (silica gel, hexanes) afforded 15.4 mg (50%) of the title compound **41**.

**Physical State:** colorless oil.

$R_f$  = 0.55 (silica gel, hexanes).

**$^1\text{H}$  NMR (600 MHz,  $\text{CDCl}_3$ ):**  $\delta$  7.41 – 7.37 (m, 2H), 7.07 – 7.02 (m, 2H), 3.40 (t,  $J$  = 6.8 Hz, 2H), 2.58 (t,  $J$  = 7.7 Hz, 2H), 1.92 – 1.81 (m, 2H), 1.66 – 1.58 (m, 2H), 1.51 – 1.45 (m, 2H).

**$^{13}\text{C}$  NMR (151 MHz,  $\text{CDCl}_3$ ):**  $\delta$  141.33, 131.50, 130.28, 119.61, 35.26, 33.82, 32.75, 30.57, 27.84.

Spectroscopic data matches that reported in the literature.<sup>14</sup>

#### Compound 44

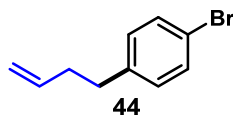

#### *1-Bromo-4-(but-3-en-1-yl)benzene (44)*

Following the General Procedure B on 0.1 mmol scale with di-*t*Bubipy (**L1**) as ligand at 75 °C. Purification by PTLC (silica gel, hexanes) afforded 7.5 mg (36%) of the title compound **44**.

**Physical State:** colorless oil.

$R_f$  = 0.65 (hexanes).

**$^1\text{H}$  NMR (600 MHz,  $\text{CDCl}_3$ ):**  $\delta$  7.42 – 7.37 (m, 2H), 7.09 – 7.04 (m, 2H), 5.82 (ddt,  $J$  = 16.9, 10.3, 6.6 Hz, 1H), 5.06 – 4.95 (m, 2H), 2.66 (dd,  $J$  = 8.7, 6.8 Hz, 2H), 2.35 (dt,  $J$  = 7.8, 6.6, 1.4 Hz, 2H).

**$^{13}\text{C}$  NMR (151 MHz,  $\text{CDCl}_3$ ):**  $\delta$  140.90, 137.73, 131.46, 130.36, 119.68, 115.43, 35.42, 34.89.

Spectroscopic data matches that reported in the literature.<sup>15</sup>

## X-Ray Crystallographic Data for Compound 17

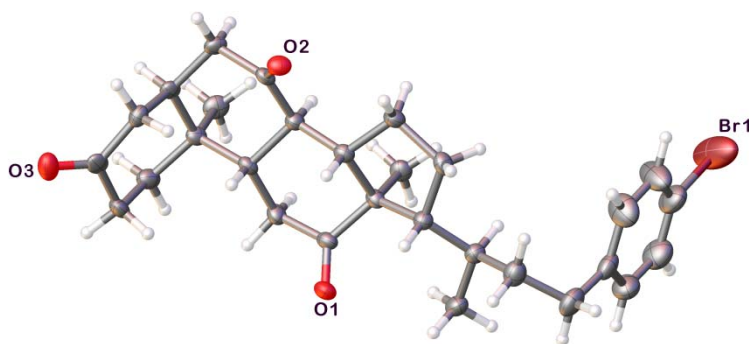

Table S1. Crystal data and structure refinement for **17**.

|                                   |                                                              |                  |
|-----------------------------------|--------------------------------------------------------------|------------------|
| Identification code               | CCDC 1477360                                                 |                  |
| Empirical formula                 | C <sub>29</sub> H <sub>37</sub> Br O <sub>3</sub>            |                  |
| Formula weight                    | 513.49                                                       |                  |
| Temperature                       | 100.0 K                                                      |                  |
| Wavelength                        | 0.71073 Å                                                    |                  |
| Crystal system                    | Monoclinic                                                   |                  |
| Space group                       | C2                                                           |                  |
| Unit cell dimensions              | a = 38.768(6) Å                                              | a = 90°.         |
|                                   | b = 6.6812(10) Å                                             | b = 100.947(4)°. |
|                                   | c = 11.1118(15) Å                                            | g = 90°.         |
| Volume                            | 2825.8(7) Å <sup>3</sup>                                     |                  |
| Z                                 | 4                                                            |                  |
| Density (calculated)              | 1.207 Mg/m <sup>3</sup>                                      |                  |
| Absorption coefficient            | 1.480 mm <sup>-1</sup>                                       |                  |
| F(000)                            | 1080                                                         |                  |
| Crystal size                      | 0.29 x 0.16 x 0.1 mm <sup>3</sup>                            |                  |
| Theta range for data collection   | 1.867 to 26.450°.                                            |                  |
| Index ranges                      | -37<=h<=48, -8<=k<=8, -13<=l<=13                             |                  |
| Reflections collected             | 17682                                                        |                  |
| Independent reflections           | 5803 [R(int) = 0.0852]                                       |                  |
| Completeness to theta = 25.242°   | 100.0 %                                                      |                  |
| Absorption correction             | Semi-empirical from equivalents                              |                  |
| Max. and min. transmission        | 0.333 and 0.277                                              |                  |
| Refinement method                 | Full-matrix least-squares on F <sup>2</sup>                  |                  |
| Data / restraints / parameters    | 5803 / 1 / 301                                               |                  |
| Goodness-of-fit on F <sup>2</sup> | 1.016                                                        |                  |
| Final R indices [I>2sigma(I)]     | R1 = 0.0648, wR2 = 0.1456                                    |                  |
| R indices (all data)              | R1 = 0.1073, wR2 = 0.1650                                    |                  |
| Absolute structure parameter      | 0.055(17)                                                    |                  |
| Extinction coefficient            | n/a                                                          |                  |
| Largest diff. peak and hole       | 0.386 and -0.879 e.Å <sup>-3</sup>                           |                  |
| SQUEEZE                           | found 125e/uc; calcd for 4 CH <sub>2</sub> Cl <sub>2</sub> , |                  |
| 168e/uc                           |                                                              |                  |

Table S2. Atomic coordinates ( $\times 10^4$ ) and equivalent isotropic displacement parameters ( $\text{\AA}^2 \times 10^3$ ) for baran577\_a\_sq.  $U(\text{eq})$  is defined as one third of the trace of the orthogonalized  $U^{ij}$  tensor.

|       | x       | y        | z        | U(eq)  |
|-------|---------|----------|----------|--------|
| Br(1) | 5185(1) | 7930(2)  | 12387(1) | 109(1) |
| O(1)  | 3502(1) | 1667(6)  | 5521(3)  | 32(1)  |
| O(2)  | 2606(1) | 8494(5)  | 5413(3)  | 27(1)  |
| O(3)  | 2212(1) | 4951(7)  | 499(4)   | 39(1)  |
| C(23) | 2797(1) | 8187(8)  | 2506(5)  | 24(1)  |
| C(15) | 3558(1) | 4875(8)  | 6538(5)  | 22(1)  |
| C(17) | 3534(2) | 3470(8)  | 5457(5)  | 24(1)  |
| C(24) | 3138(2) | 6970(8)  | 2707(5)  | 24(1)  |
| C(28) | 2467(2) | 5291(8)  | 1311(5)  | 29(1)  |
| C(16) | 3881(2) | 6256(9)  | 6654(5)  | 28(1)  |
| C(20) | 3160(2) | 7262(8)  | 5055(4)  | 22(1)  |
| C(19) | 3179(2) | 5835(8)  | 3947(4)  | 22(1)  |
| C(14) | 3201(1) | 6056(8)  | 6242(4)  | 22(1)  |
| C(29) | 2465(2) | 6867(9)  | 2256(5)  | 26(1)  |
| C(18) | 3509(2) | 4504(9)  | 4225(5)  | 27(1)  |
| C(13) | 3192(2) | 7149(8)  | 7435(5)  | 28(1)  |
| C(21) | 2828(2) | 8458(8)  | 4766(5)  | 22(1)  |
| C(22) | 2779(2) | 9614(8)  | 3578(5)  | 26(1)  |
| C(9)  | 3861(1) | 3101(10) | 8598(4)  | 26(1)  |
| C(25) | 3451(2) | 8383(9)  | 2691(5)  | 32(2)  |
| C(10) | 4056(2) | 1564(9)  | 7936(5)  | 34(1)  |
| C(11) | 3528(2) | 3936(9)  | 7779(5)  | 24(1)  |
| C(12) | 3365(2) | 5666(9)  | 8432(5)  | 28(1)  |
| C(7)  | 4068(2) | 1415(11) | 10718(6) | 43(2)  |
| C(26) | 3120(2) | 5542(9)  | 1621(5)  | 32(1)  |
| C(8)  | 3756(2) | 2140(10) | 9749(5)  | 36(2)  |
| C(6)  | 4341(2) | 2976(11) | 11148(5) | 36(1)  |
| C(27) | 2804(2) | 4131(9)  | 1420(5)  | 34(2)  |
| C(5)  | 4690(2) | 2696(12) | 11106(6) | 46(2)  |
| C(4)  | 4937(2) | 4132(13) | 11476(7) | 54(2)  |
| C(3)  | 4844(2) | 5907(12) | 11905(7) | 55(2)  |
| C(1)  | 4253(2) | 4803(13) | 11590(7) | 58(2)  |
| C(2)  | 4499(2) | 6280(14) | 11964(8) | 68(2)  |

## References

1. J. Cornella, J. T. Edwards, T. Qin, S. Kawamura, J. Wang, C. M. Pan, R. Gianatassio, M. Schmidt, M. D. Eastgate, P. S. Baran, *J. Am. Chem. Soc.* **2016**, *138*, 2174.
2. T. Qin, J. Cornella, C. Li, L. R. Malins, J. T. Edwards, S. Kawamura, B. D. Maxwell, M. D. Eastgate, P. S. Baran, *Science* **2016**, *352*, 801.
3. D. M. Allwood, D. C. Blakemore, A. D. Brown, S. V. Ley, *J. Org. Chem.* **2014**, *79*, 328.
4. M. Kaufmann, M. Gisler, C. J. Leumann, *Angew. Chem. Int. Ed.* **2009**, *48*, 3810; *Angew. Chem. Int. Ed.* **2009**, *121*, 3868.
5. I. Papanastasioua, S. Riganasa, G. B. Foscolosa, A. Tsotinisa, S. A. Akhtarb, M. A. Khanb, K. M. Rahmanb, D. E. Thurstonb, *Lett. Org. Chem.* **2015**, *12*, 319.
6. M. Zaidlewicz, A. Wolan, *J. Organomet. Chem.* **2002**, *657*, 129.
7. a) H. Brunner, J. Furst, J. Ziegler, *J. Organomet. Chem.* **1993**, *454*, 87; b) T. A. Mitchell, J. W. Bode, *J. Am. Chem. Soc.* **2009**, *131*, 18057.
8. O. Vechorkin, V. Proust, X. Hu, *J. Am. Chem. Soc.* **2009**, *131*, 9756.
9. G. A. Molander, K. M. Traister, B. T. O'Neill, *J. Org. Chem.* **2014**, *79*, 5771.
10. T. D. Franco, A. Epenoy, X. Hu, *Org. Lett.* **2015**, *17*, 4910.
11. B. Atwater, N. Chandrasoma, D. Mitchell, M. J. Rodriguez, M. Pompeo, R. D. J. Froese, M. G. Organ, *Angew. Chem. Int. Ed.* **2015**, *54*, 9502; *Angew. Chem.* **2015**, *127*, 9638.
12. J. (S.) Zhou, G. C. Fu, *J. Am. Chem. Soc.* **2004**, *126*, 1340.
13. F. González-Bobes, G. C. Fu, *J. Am. Chem. Soc.* **2006**, *128*, 5360.
14. J. C. Vogel, R. Butler, D. J. Procter, *Tetrahedron* **2008**, *64*, 11876.
15. G. A. Molander, D. L. Sandrock, *J. Am. Chem. Soc.* **2008**, *130*, 15792.

## Spectra for Compounds

### Compound S1 $^1\text{H}$ NMR

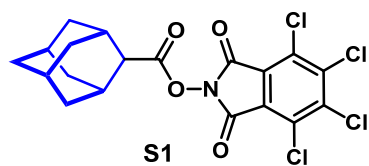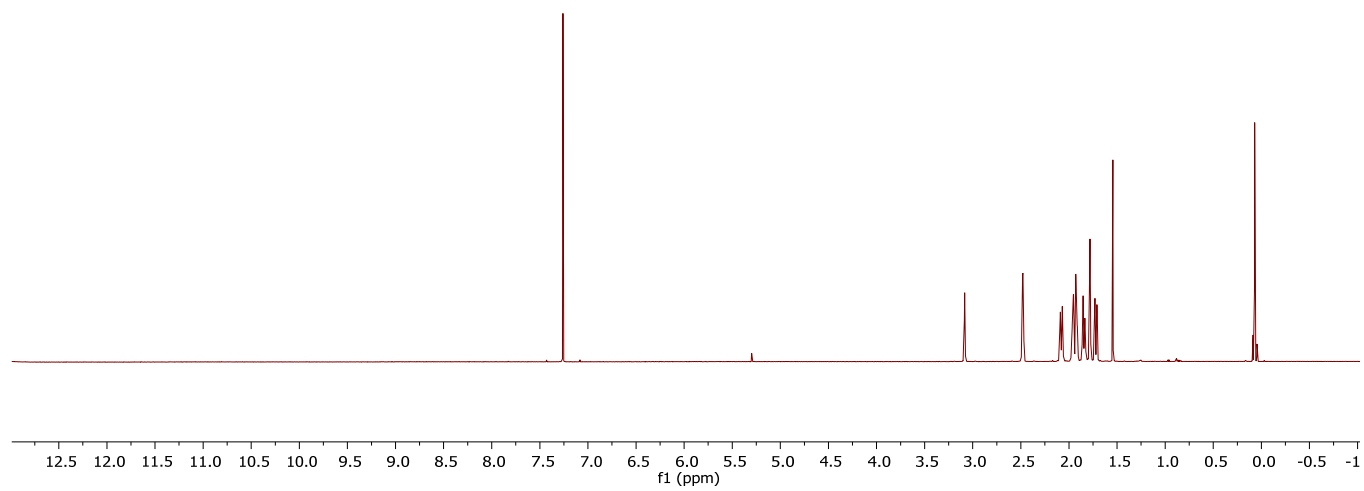



# Compound S1 <sup>13</sup>C NMR

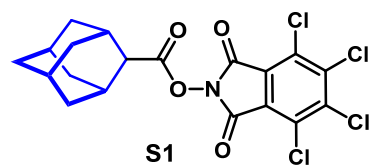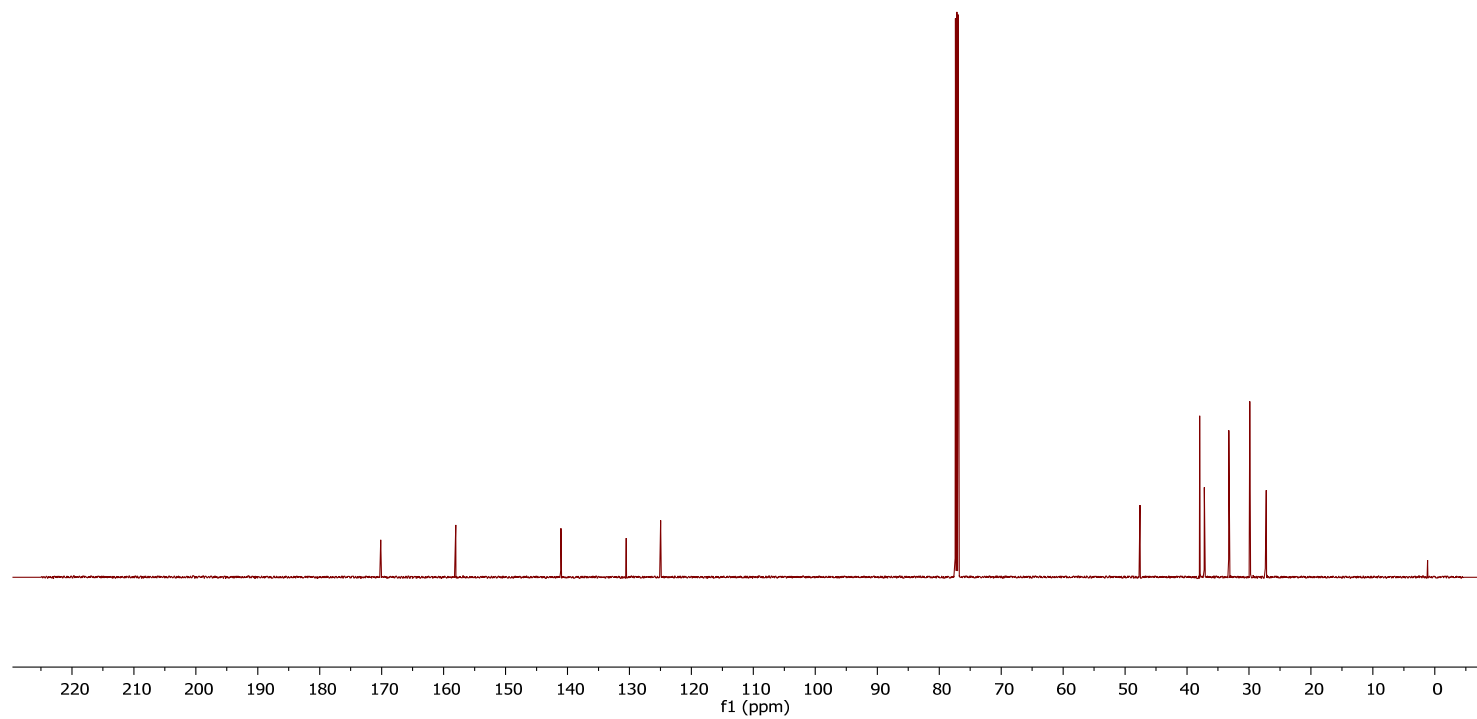

# Compound S2 <sup>1</sup>H NMR

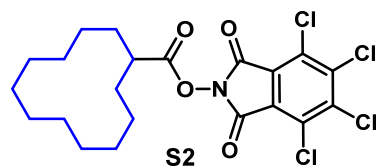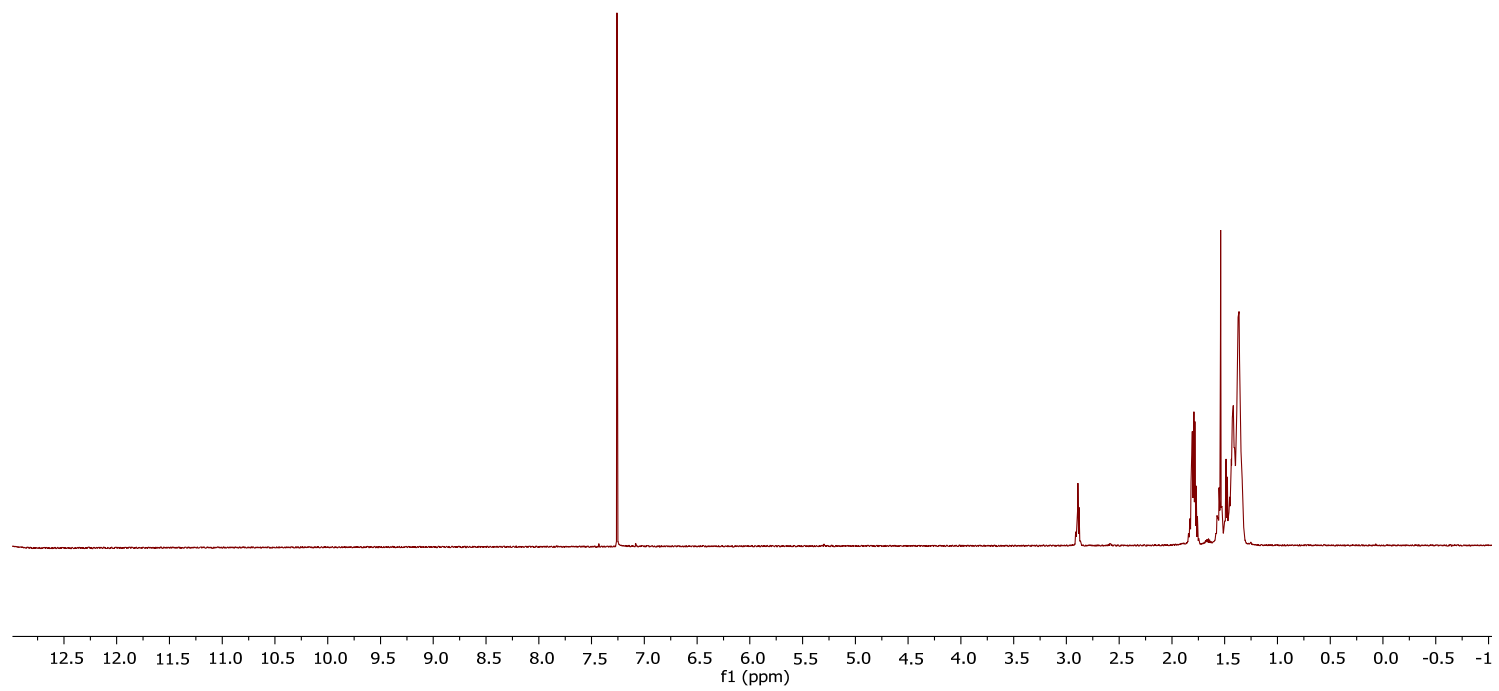

# Compound S2 $^{13}\text{C}$ NMR

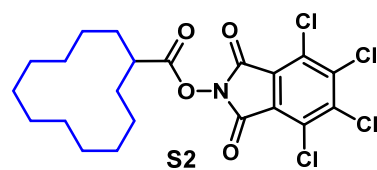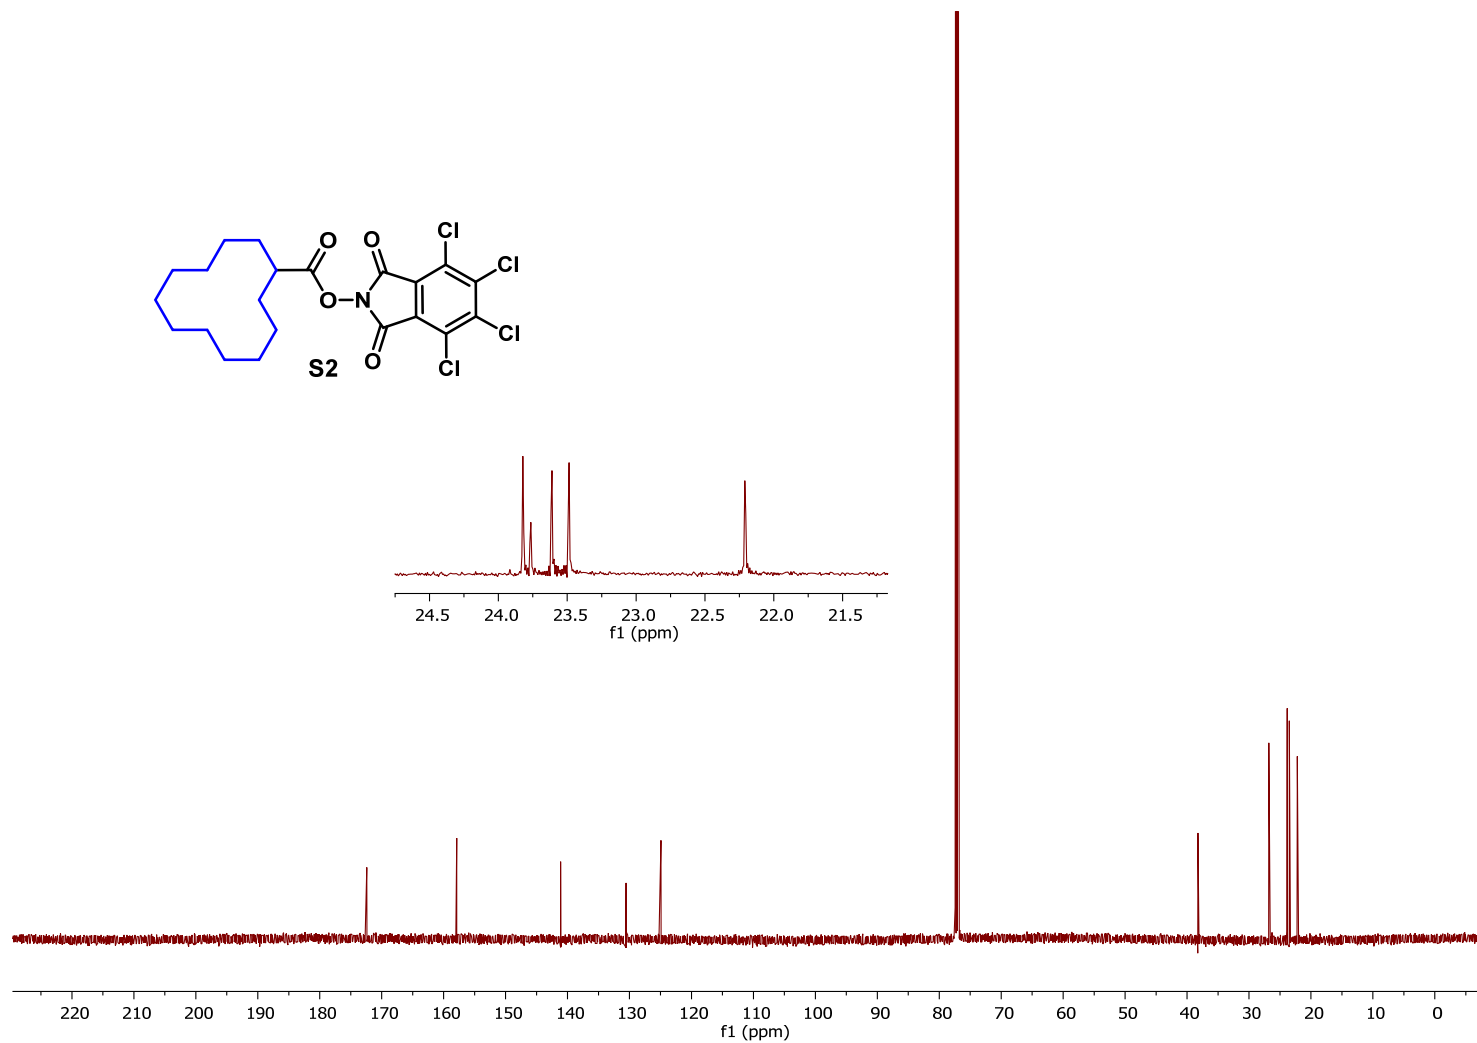

# Compound (±)-S3 <sup>1</sup>H NMR

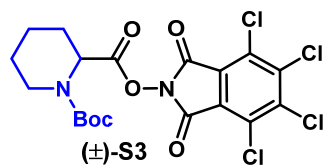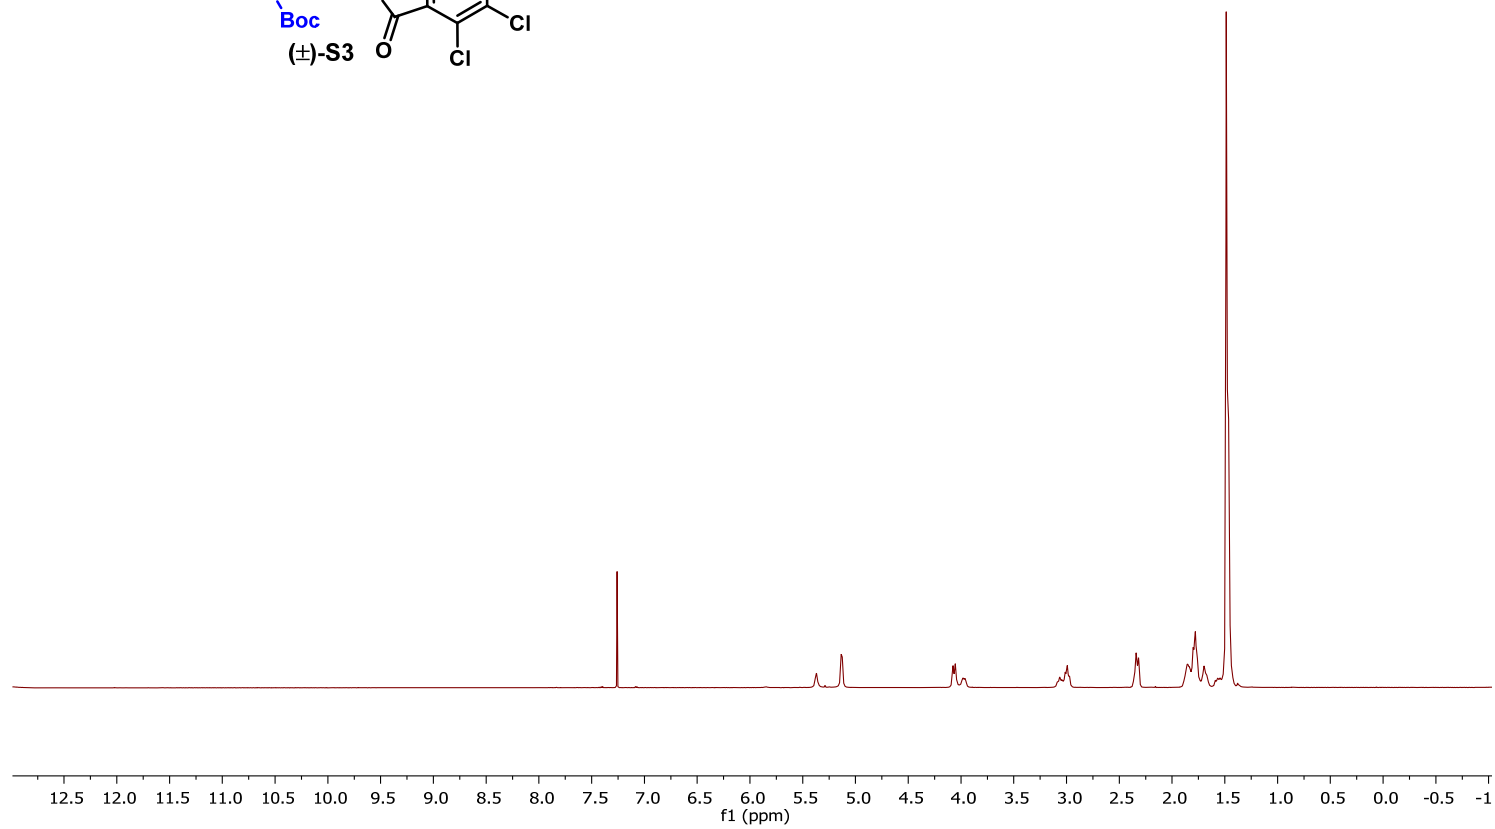

Compound ( $\pm$ )-S3  $^{13}\text{C}$  NMR

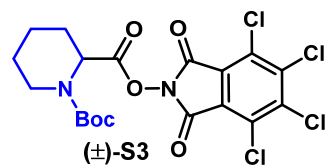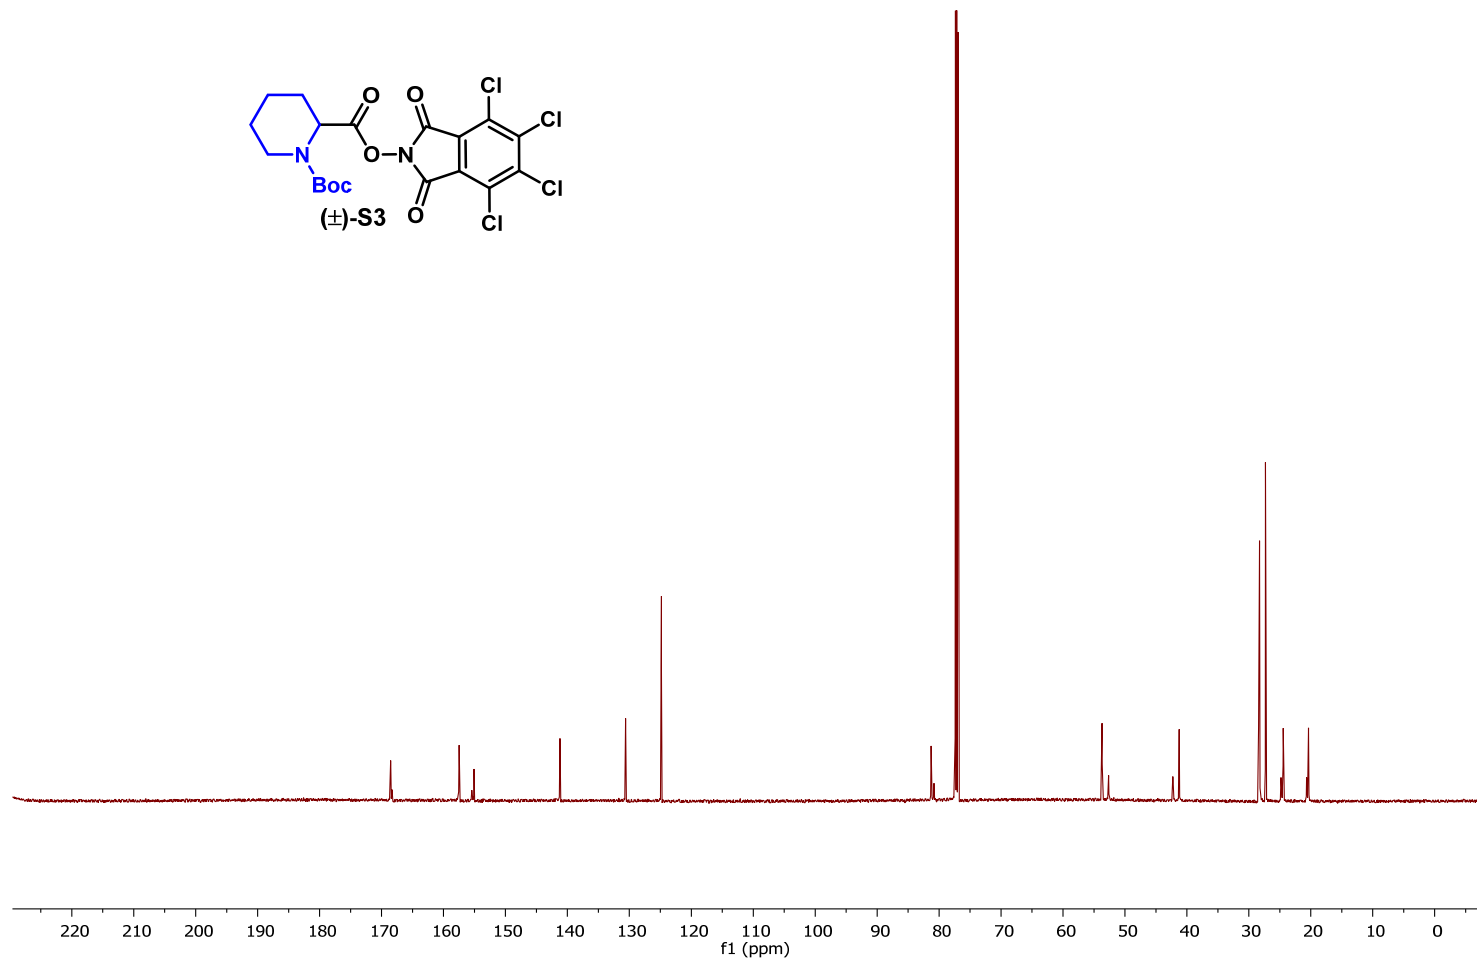

# Compound S4 <sup>1</sup>H NMR

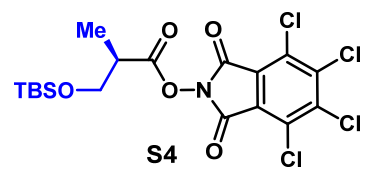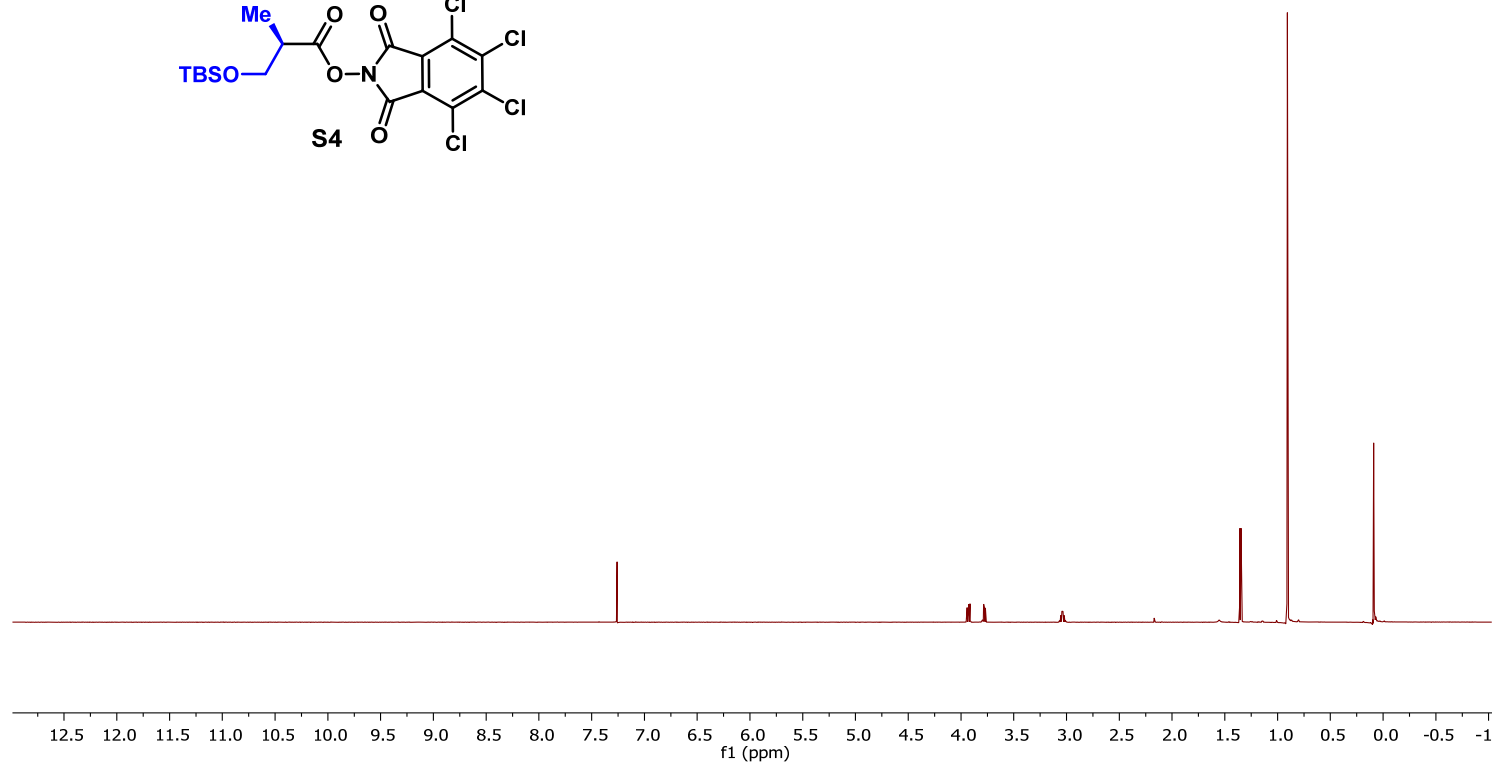

# Compound S4 $^{13}\text{C}$ NMR

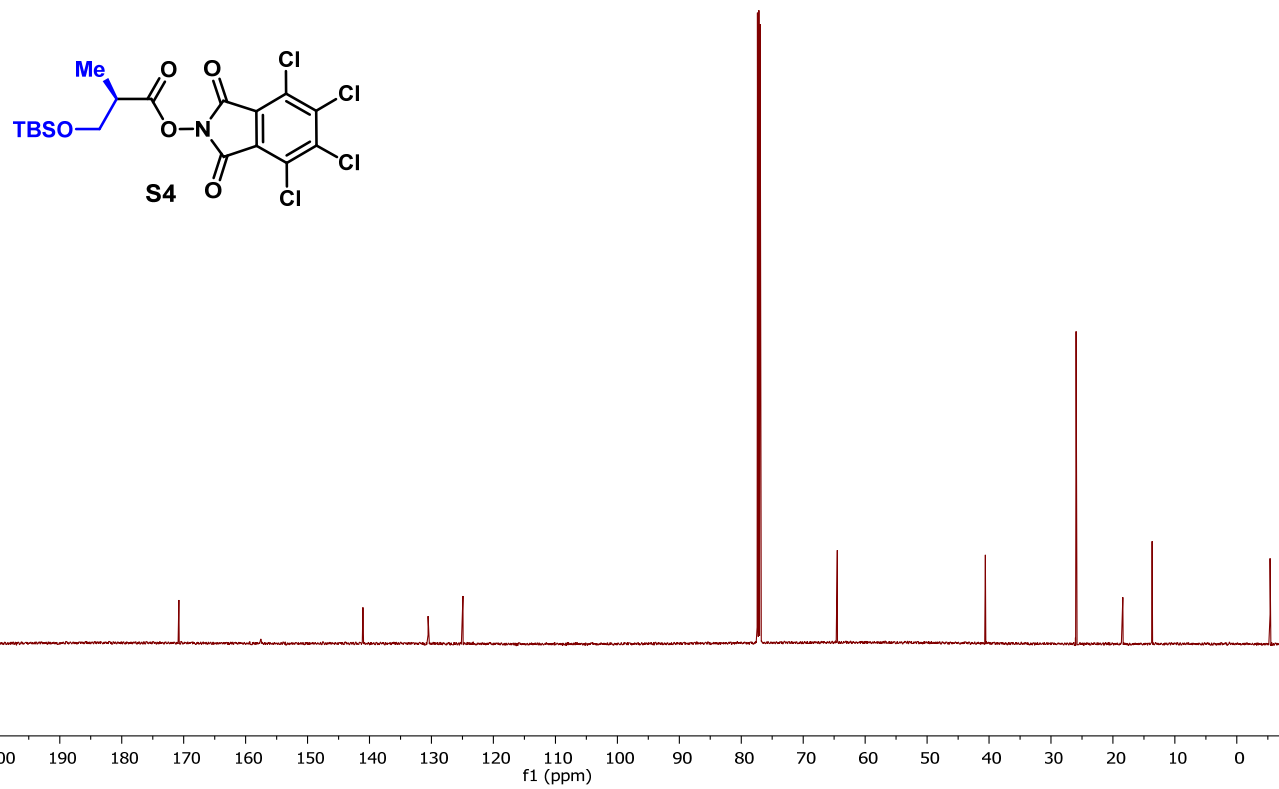

# Compound S5 <sup>1</sup>H NMR

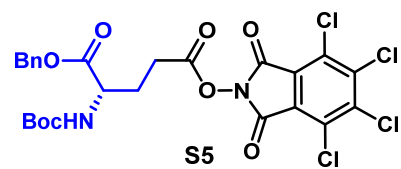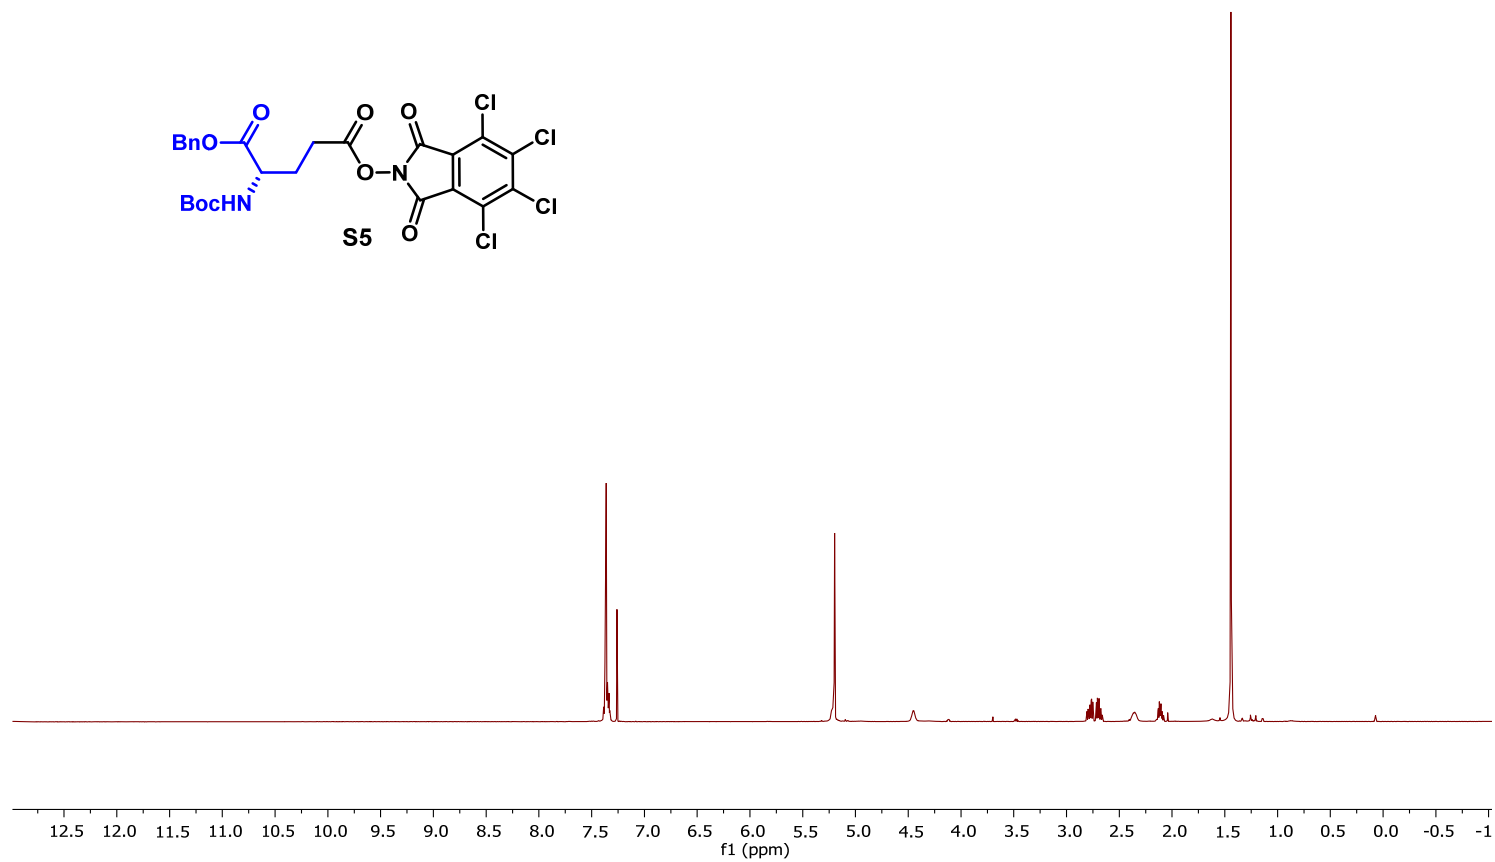



# Compound S5 $^{13}\text{C}$ NMR

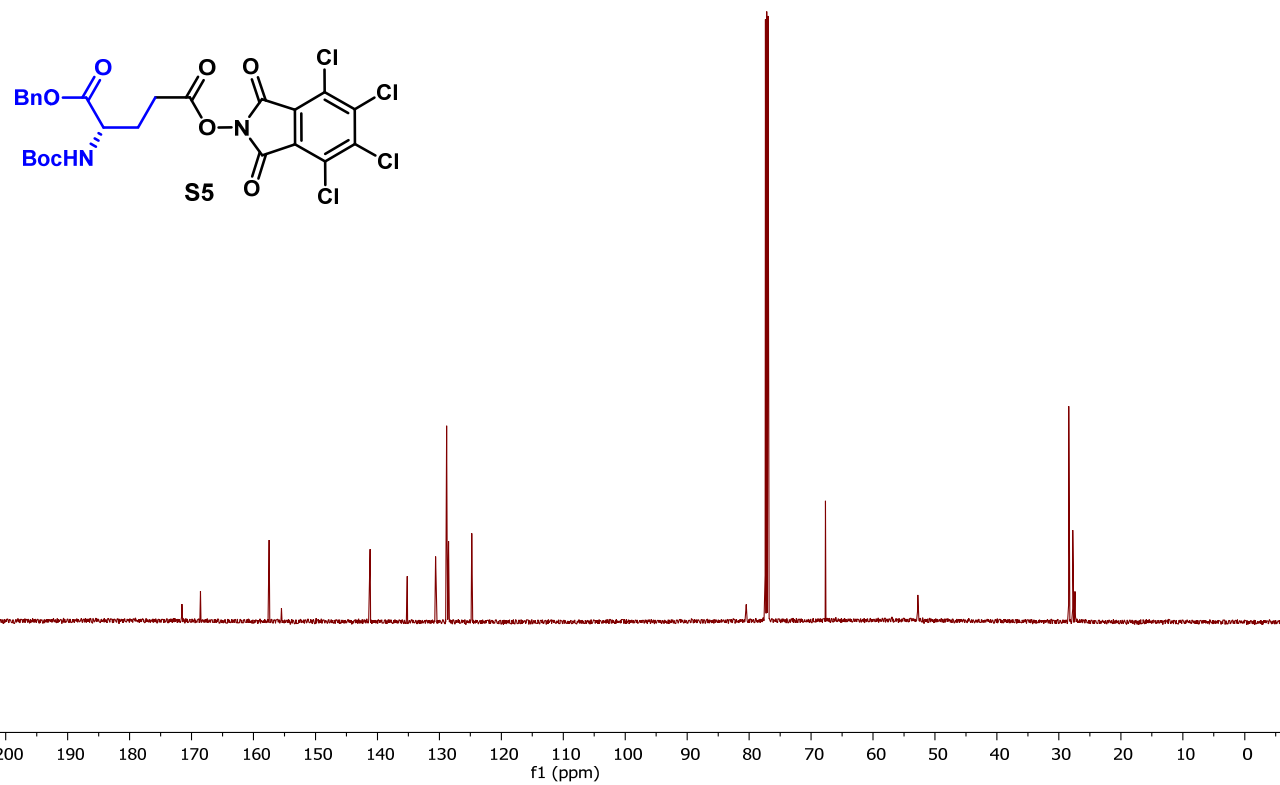

# Compound S6 <sup>1</sup>H NMR

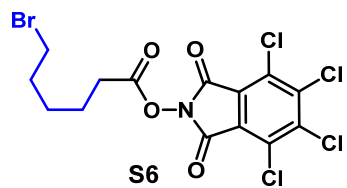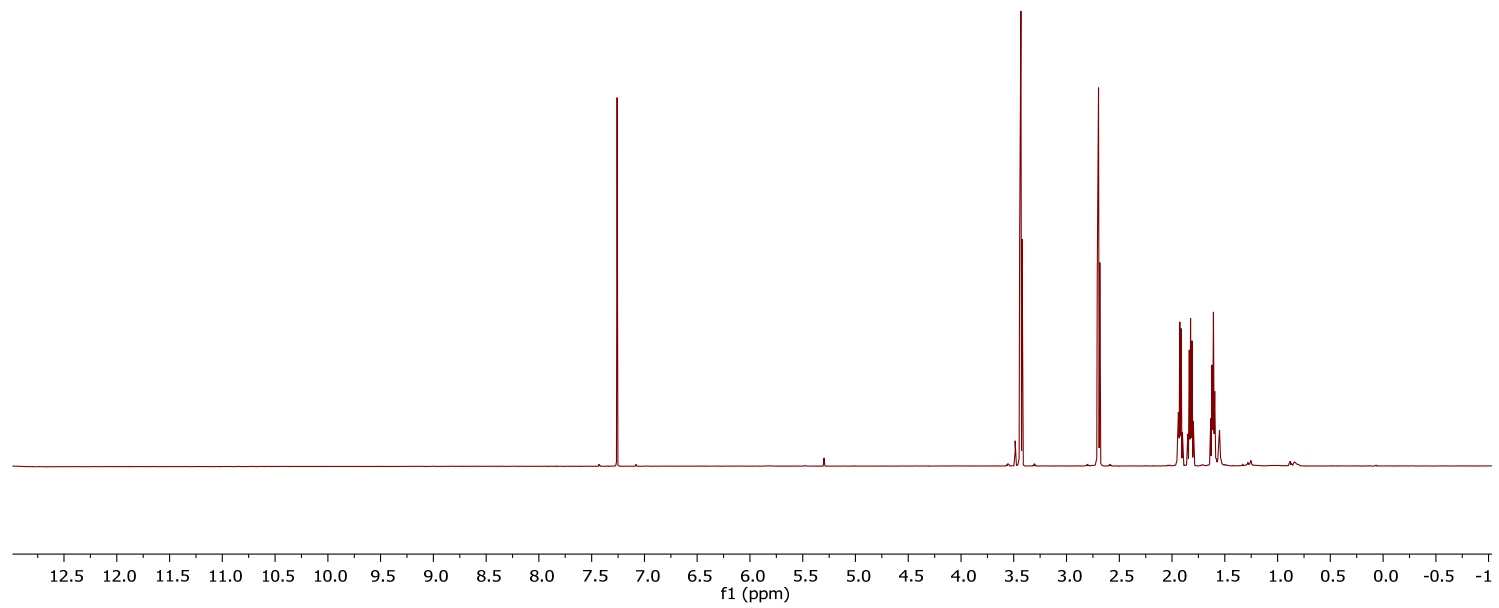

# Compound S6 <sup>13</sup>C NMR

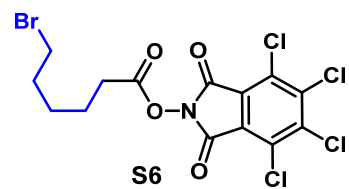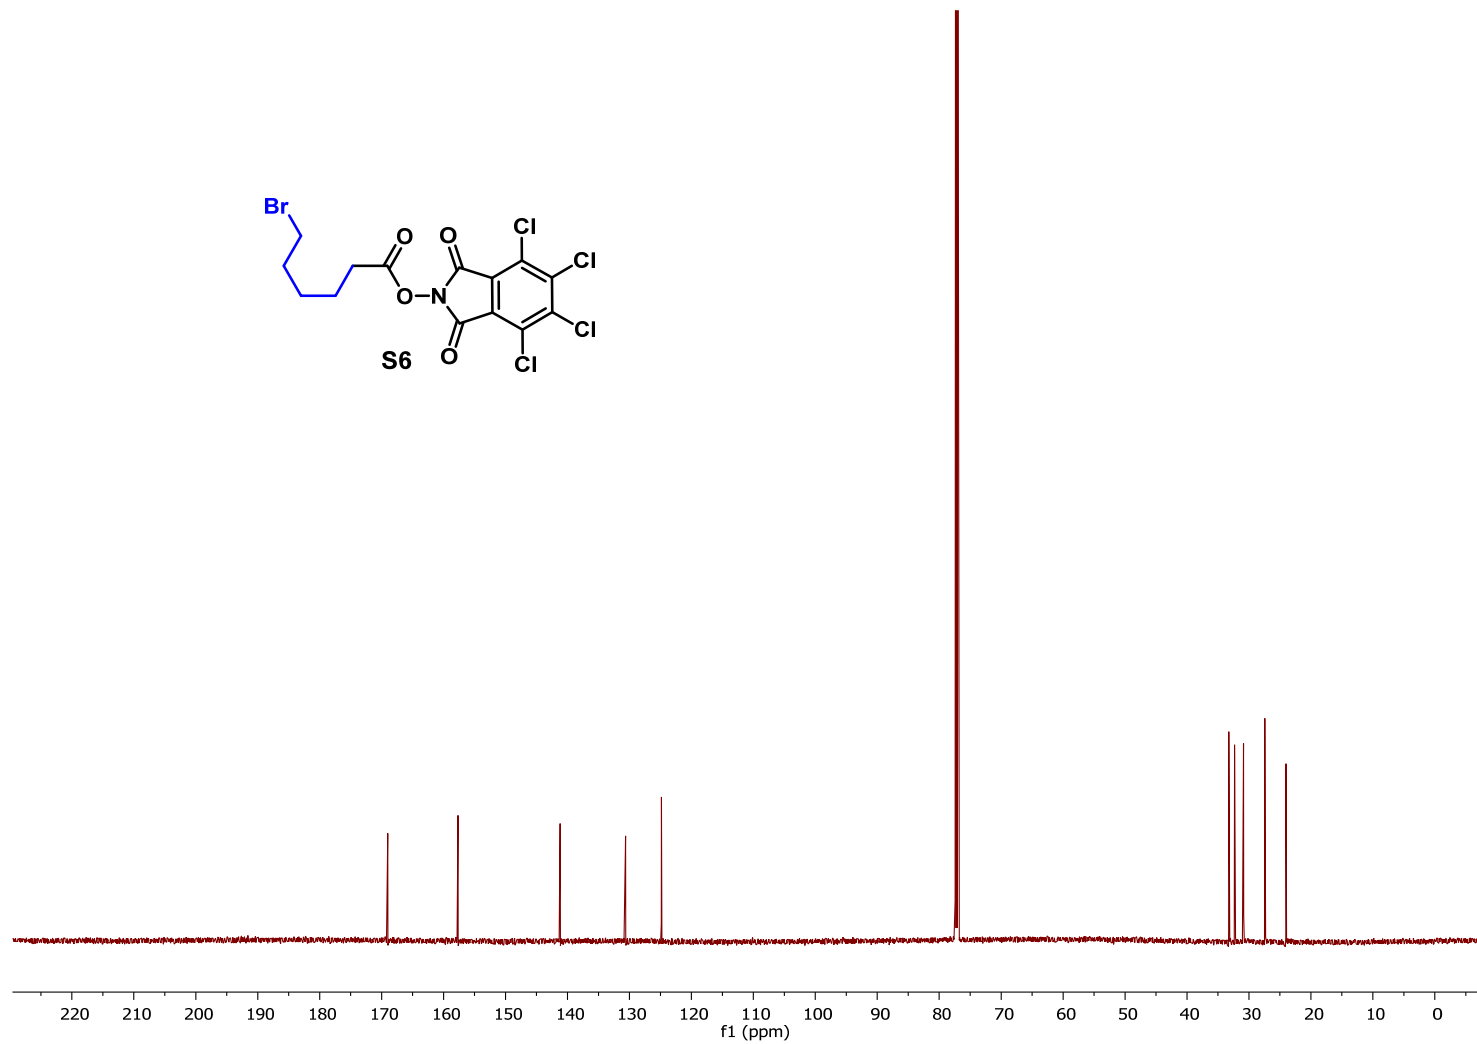

# Compound 3 <sup>1</sup>H NMR

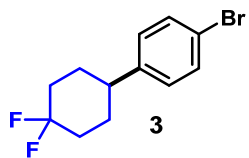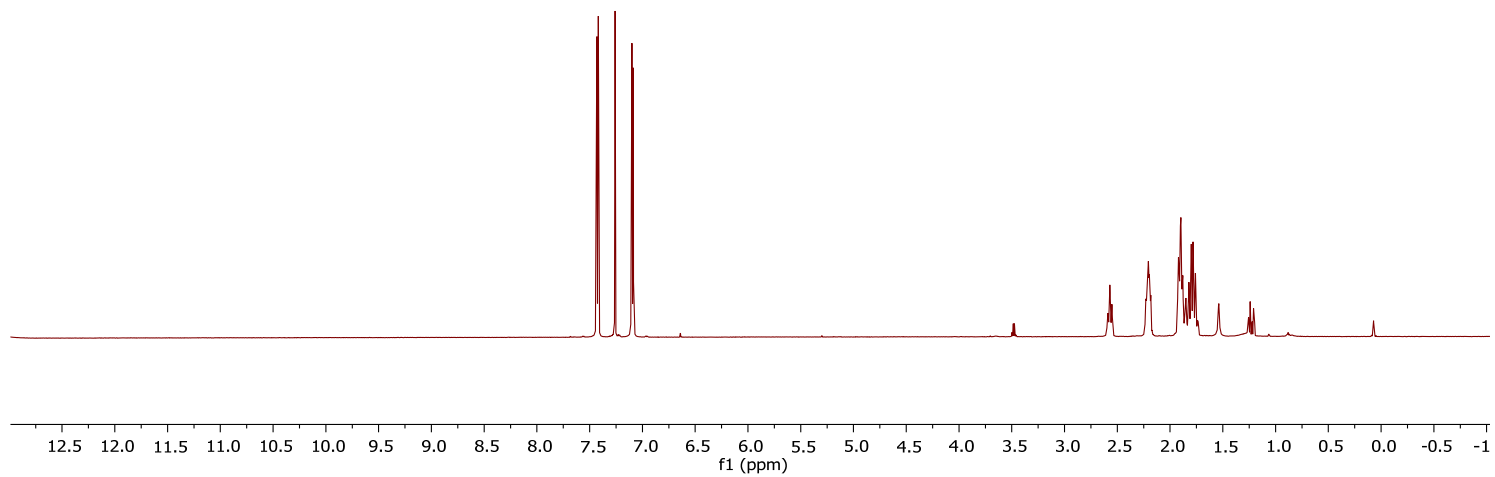

# Compound 3 <sup>13</sup>C NMR

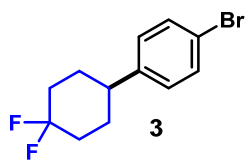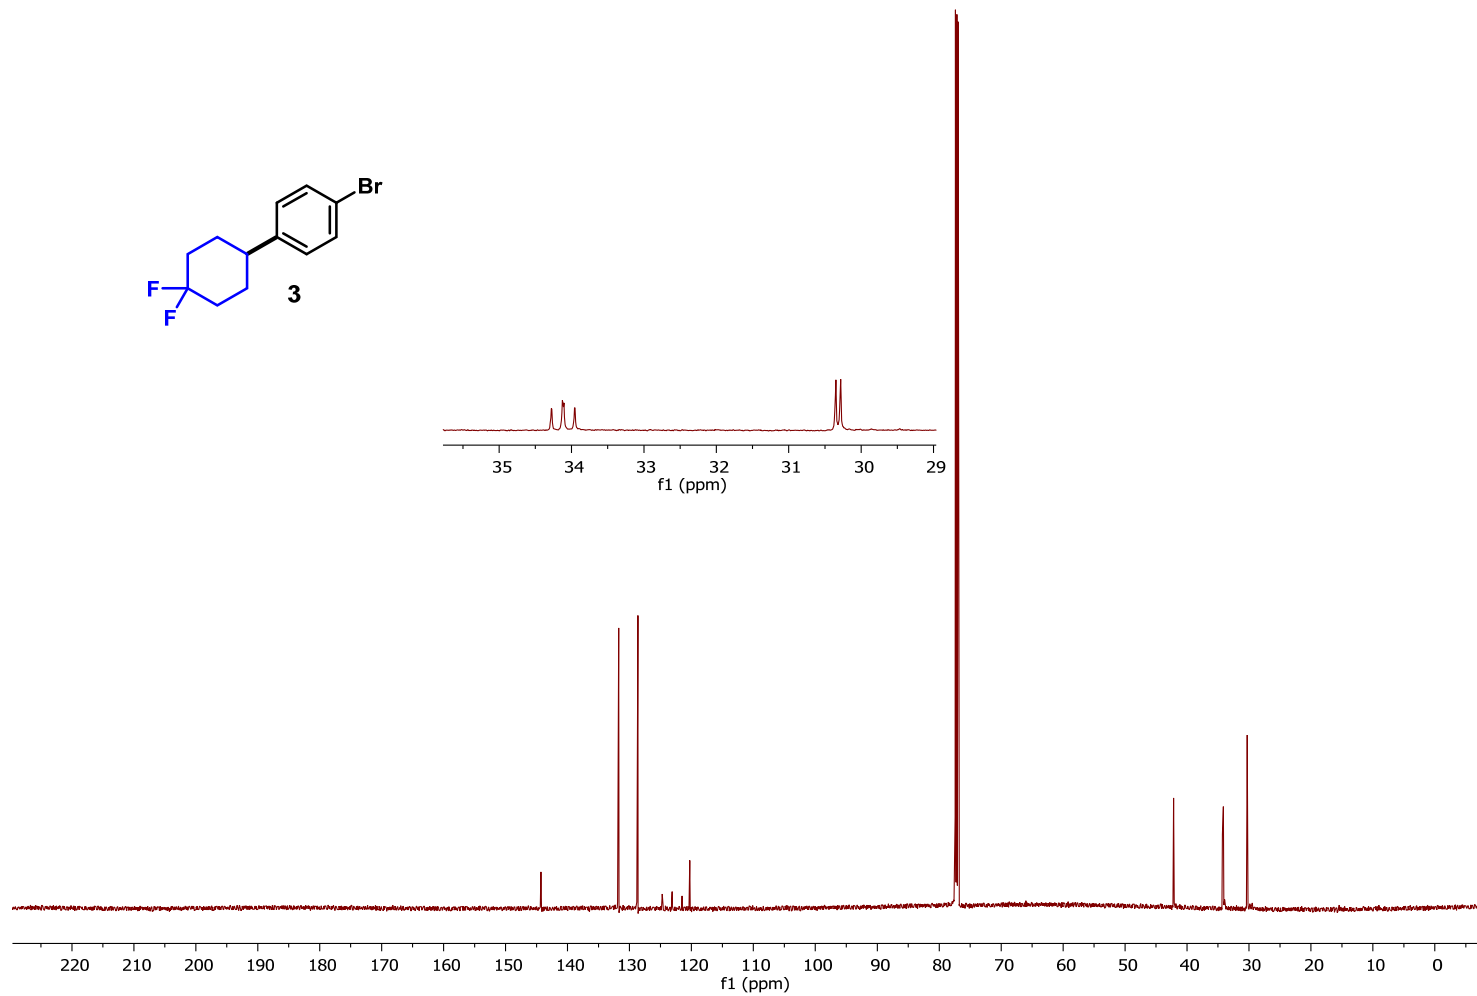

# Compound 3 $^{19}\text{F}$ NMR

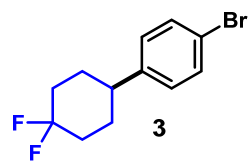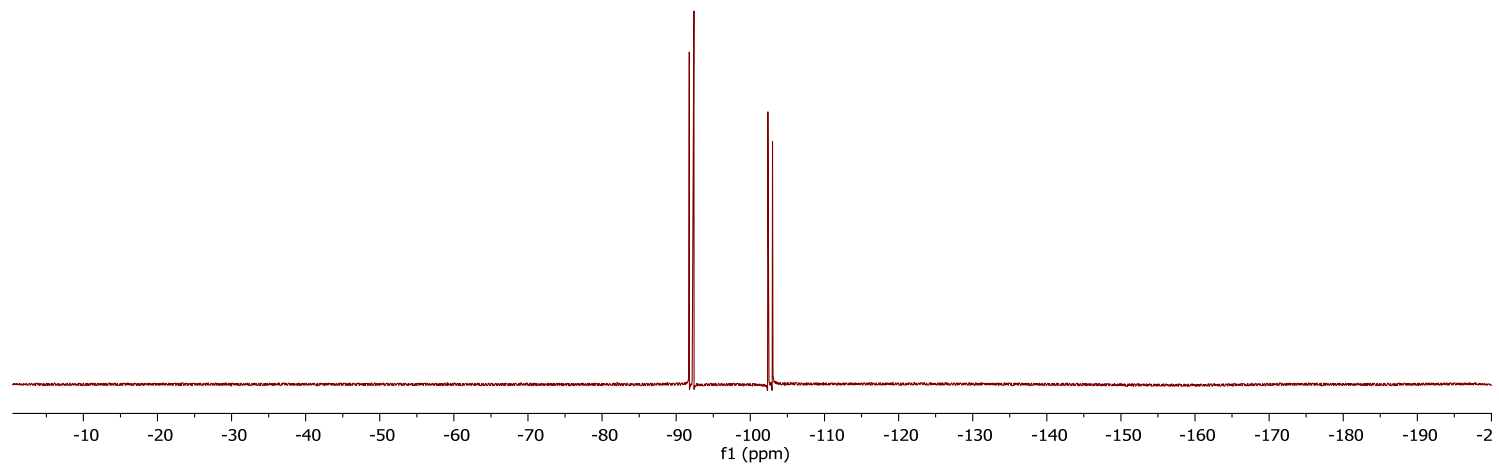

# Compound 4 <sup>1</sup>H NMR

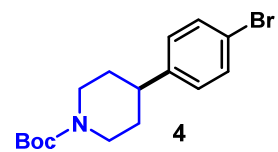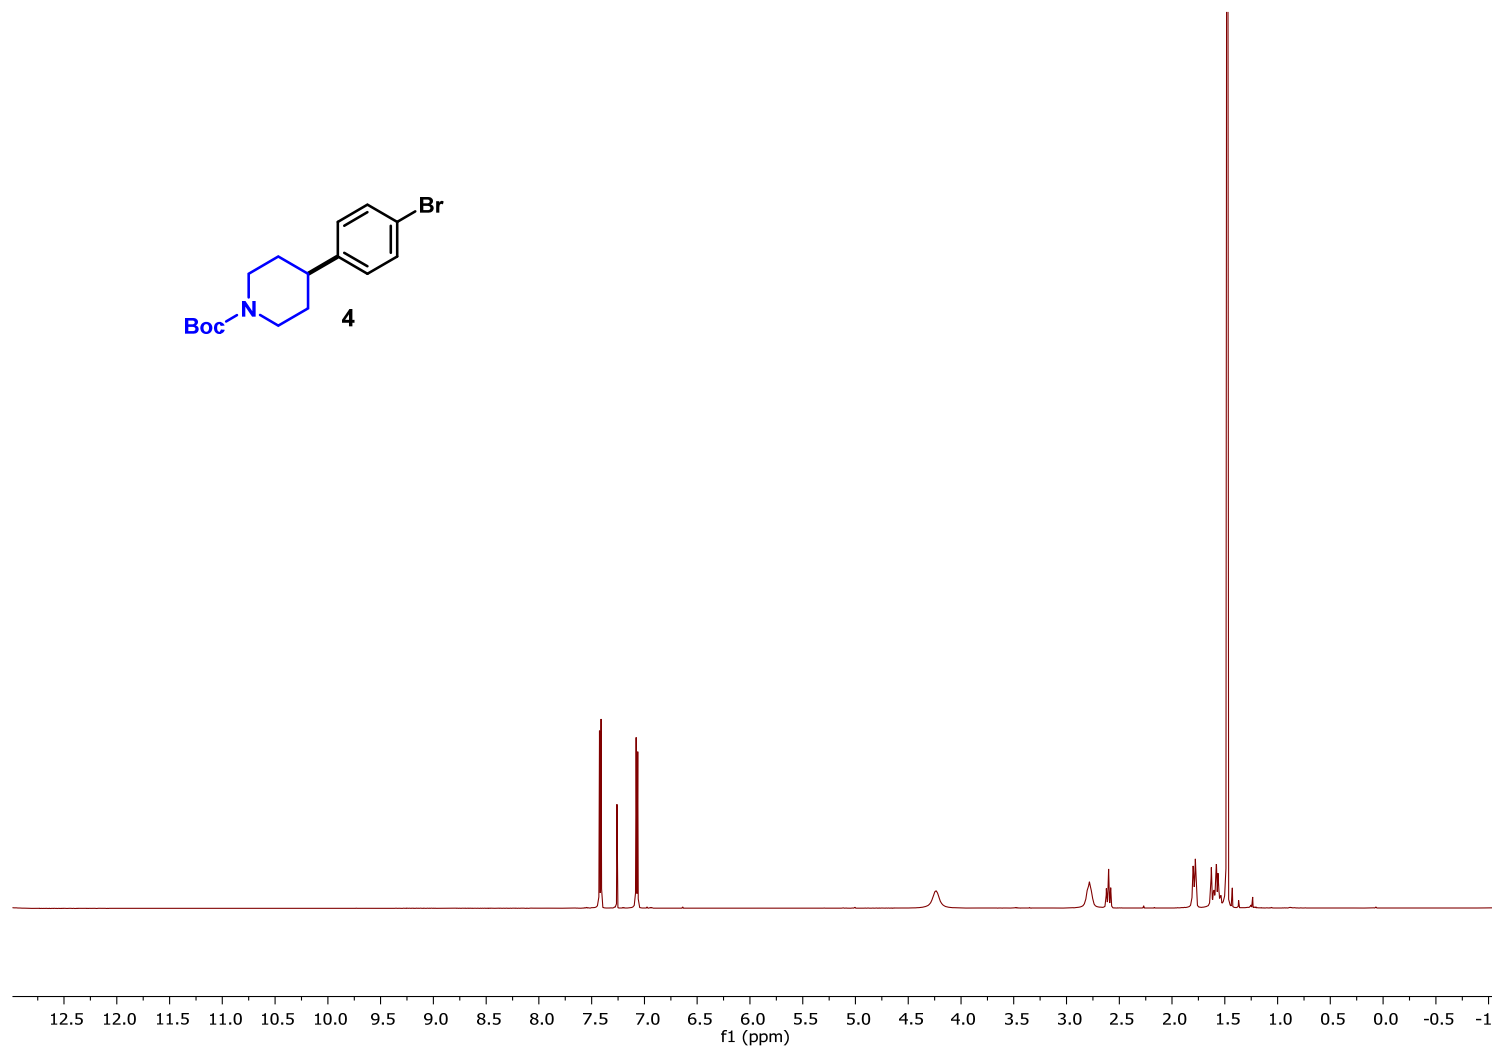

# Compound 4 <sup>13</sup>C NMR

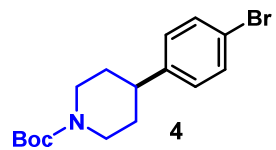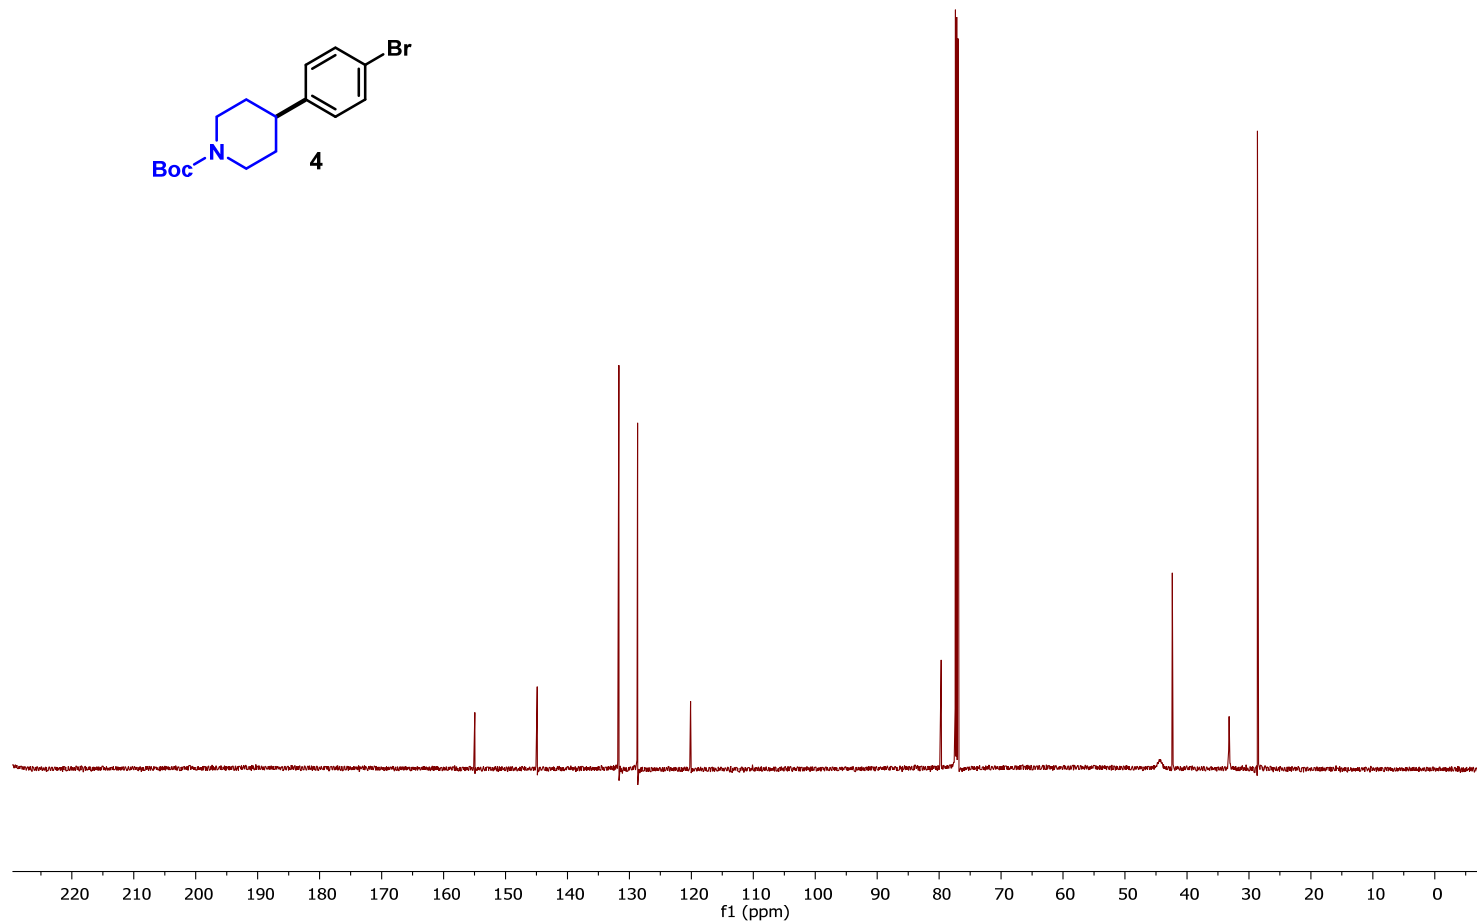



# Compound 5 $^1\text{H}$ NMR

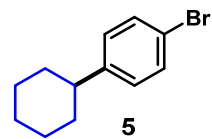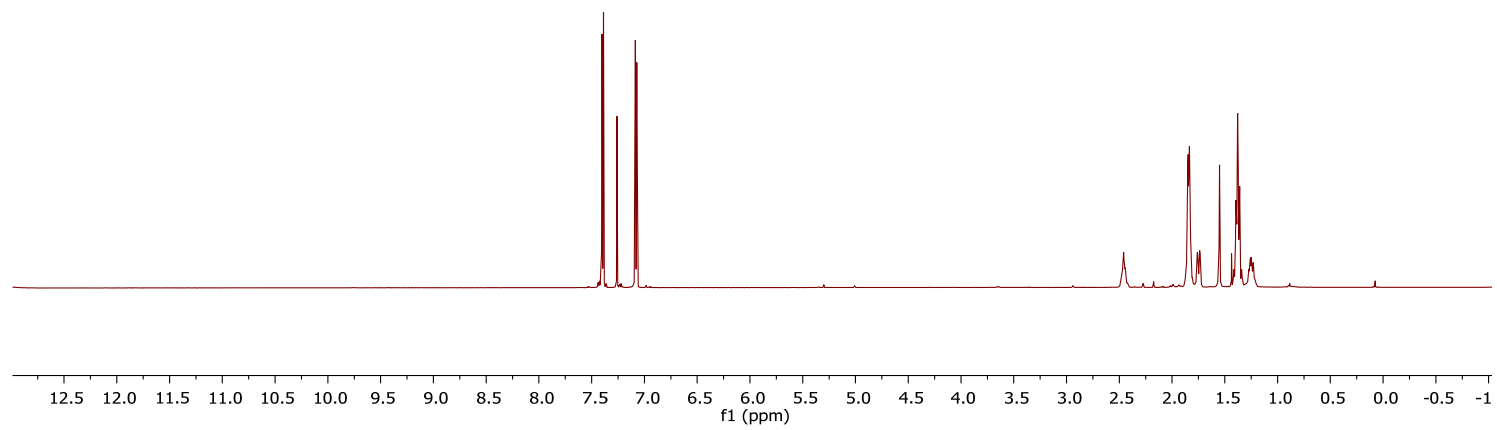

# Compound 5 $^{13}\text{C}$ NMR

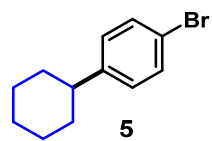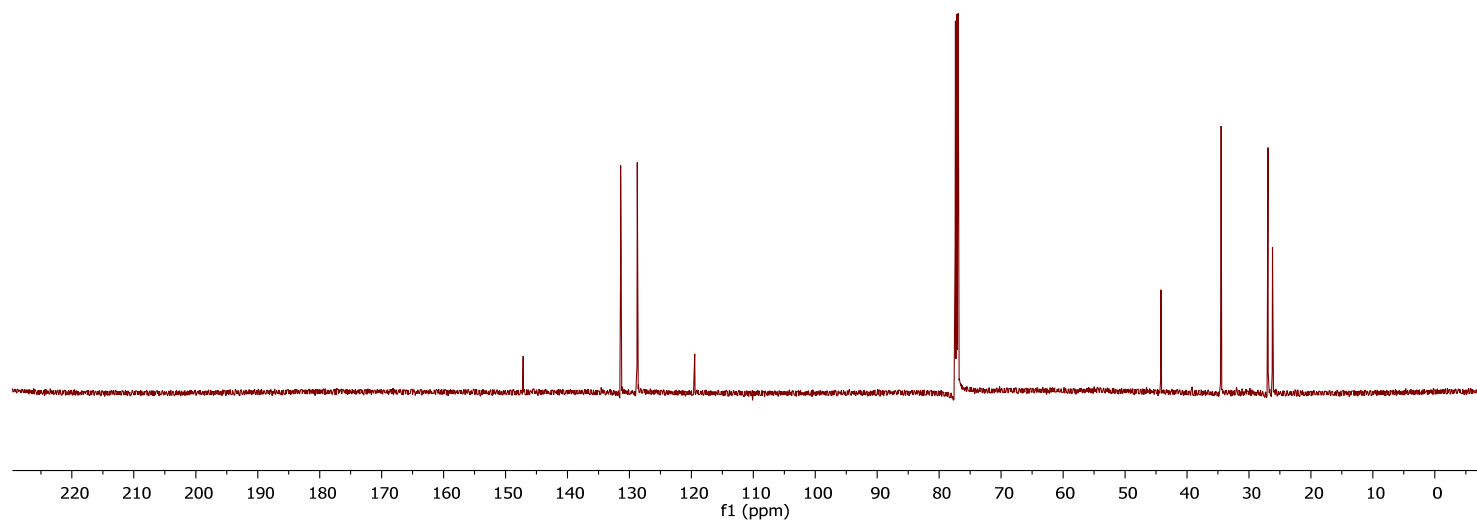

# Compound 6 $^1\text{H}$ NMR

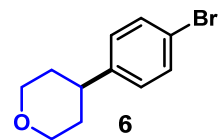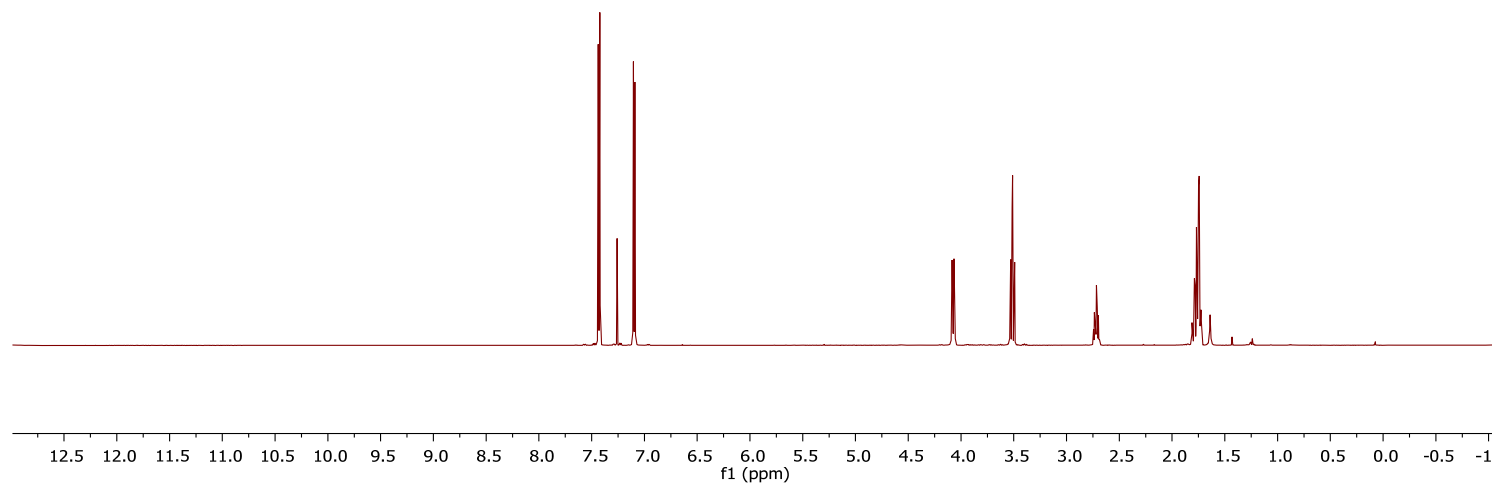

# Compound 6 $^{13}\text{C}$ NMR

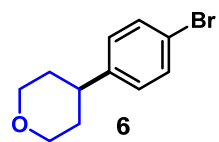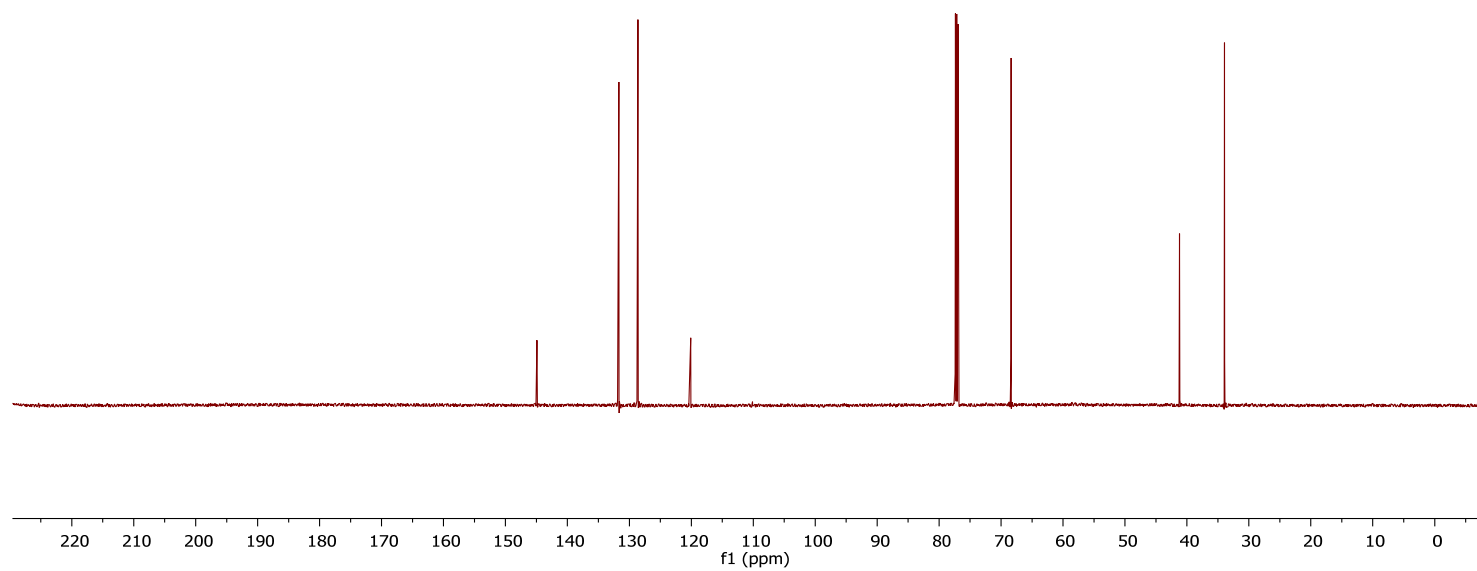

# Compound 7 $^1\text{H}$ NMR

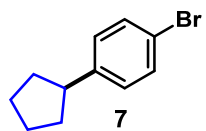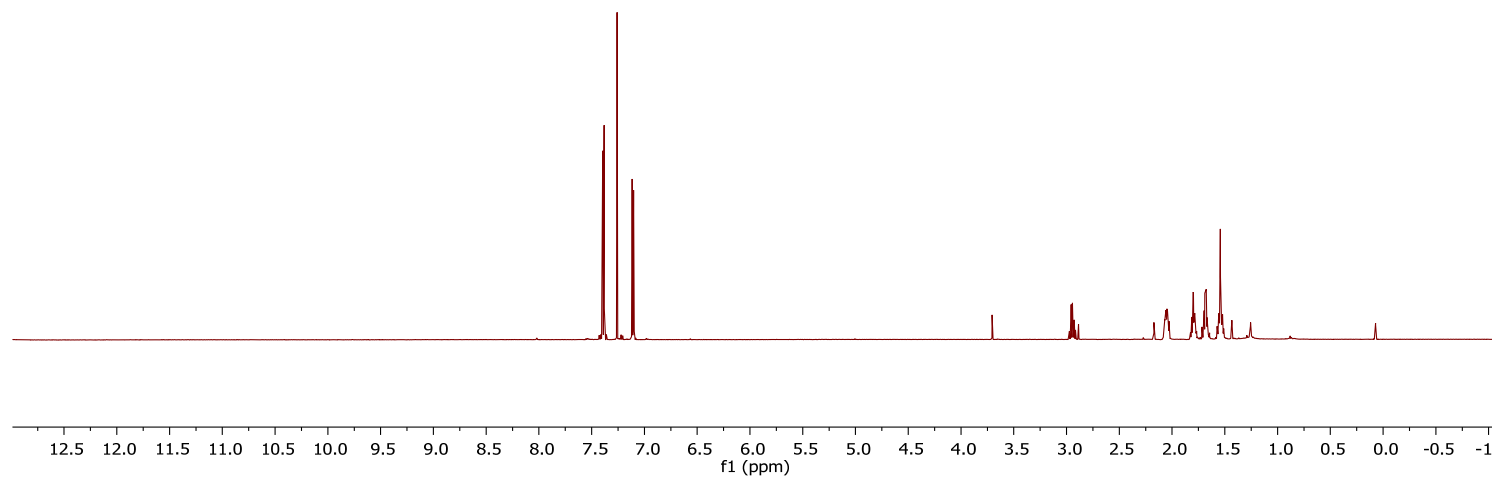

# Compound 7 $^{13}\text{C}$ NMR

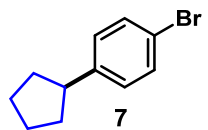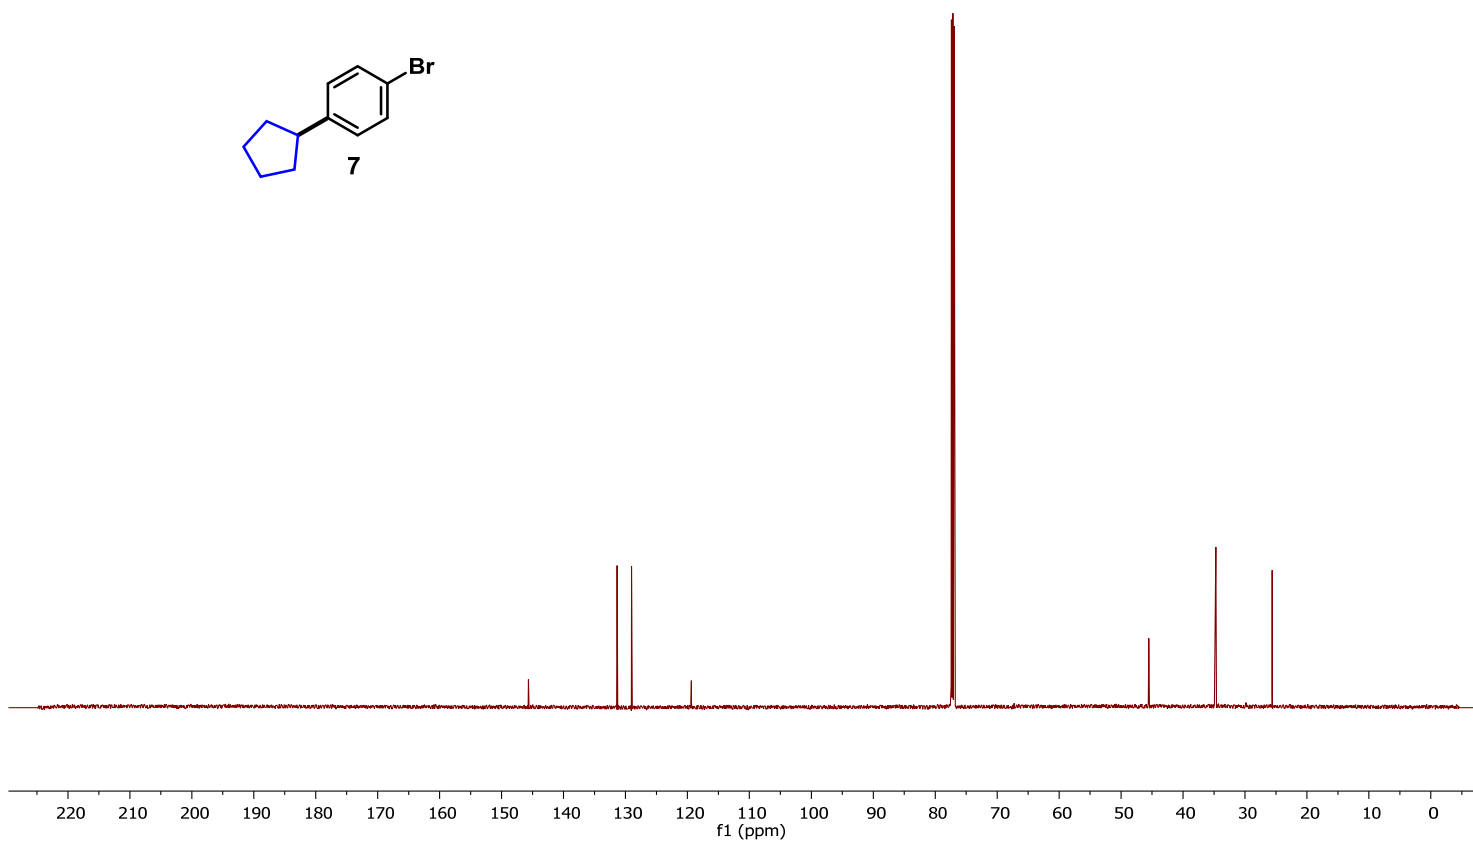

# Compound 8 $^1\text{H}$ NMR

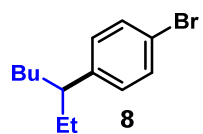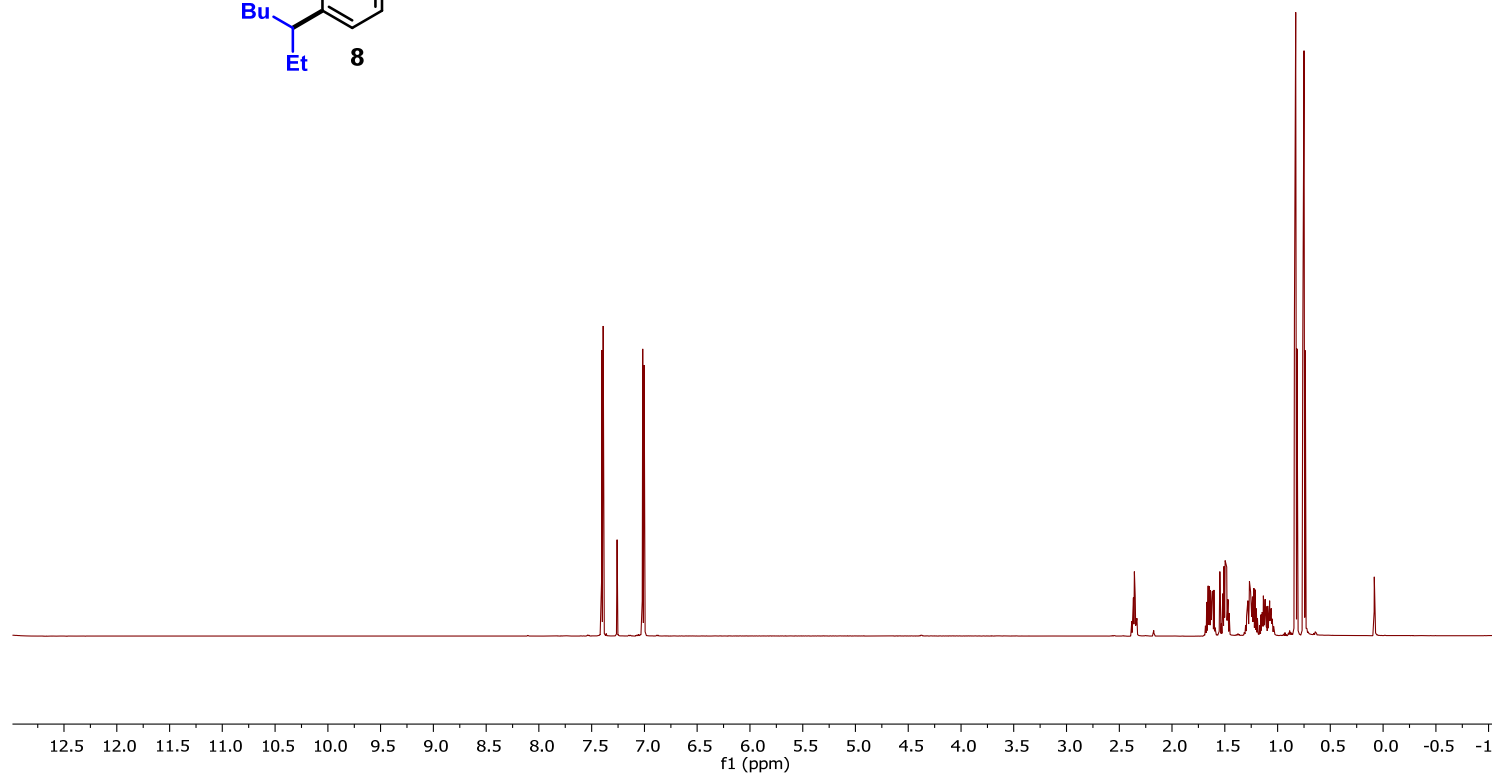

# Compound 8 $^{13}\text{C}$ NMR

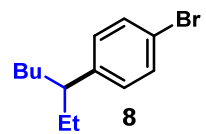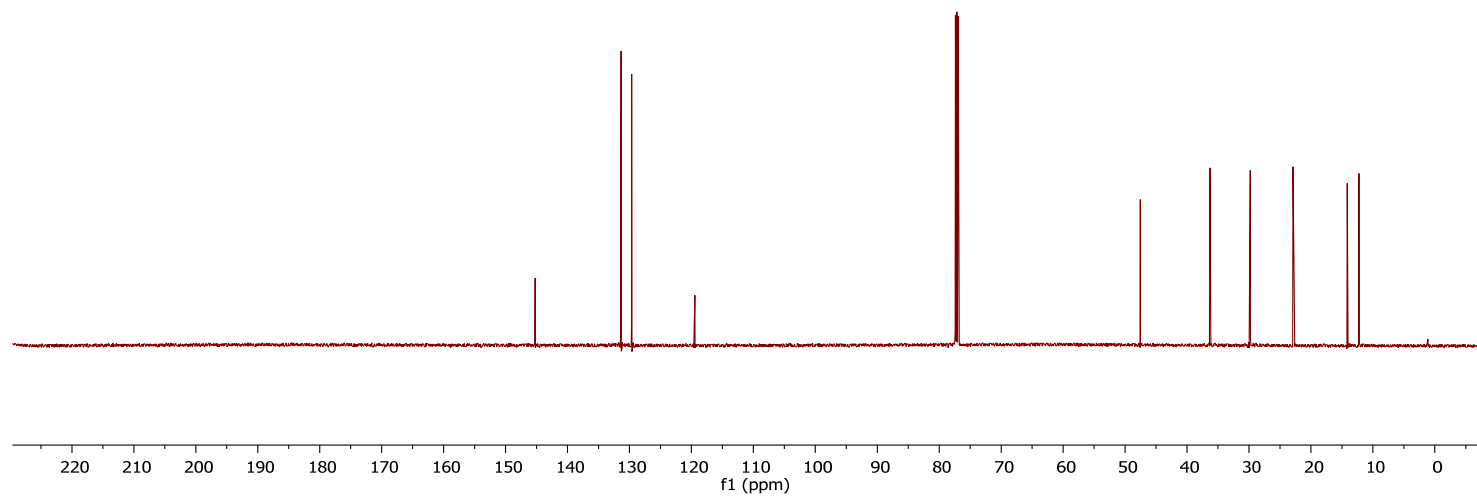



# Compound 9 $^1\text{H}$ NMR

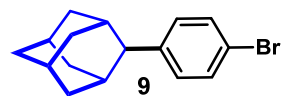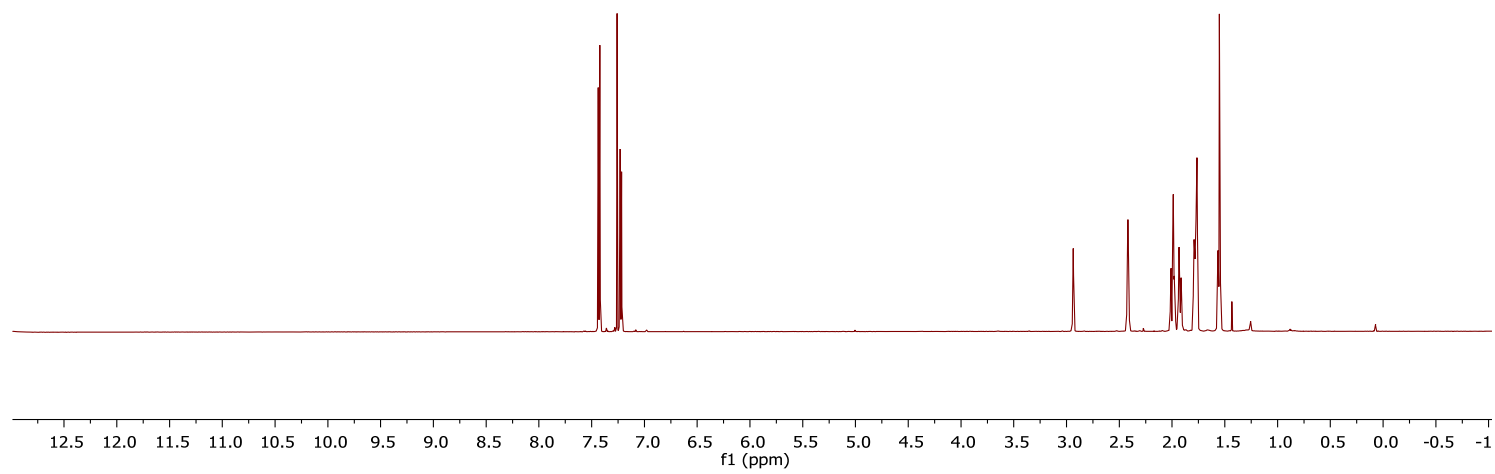

# Compound 9 $^{13}\text{C}$ NMR

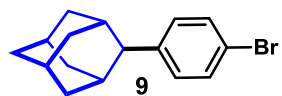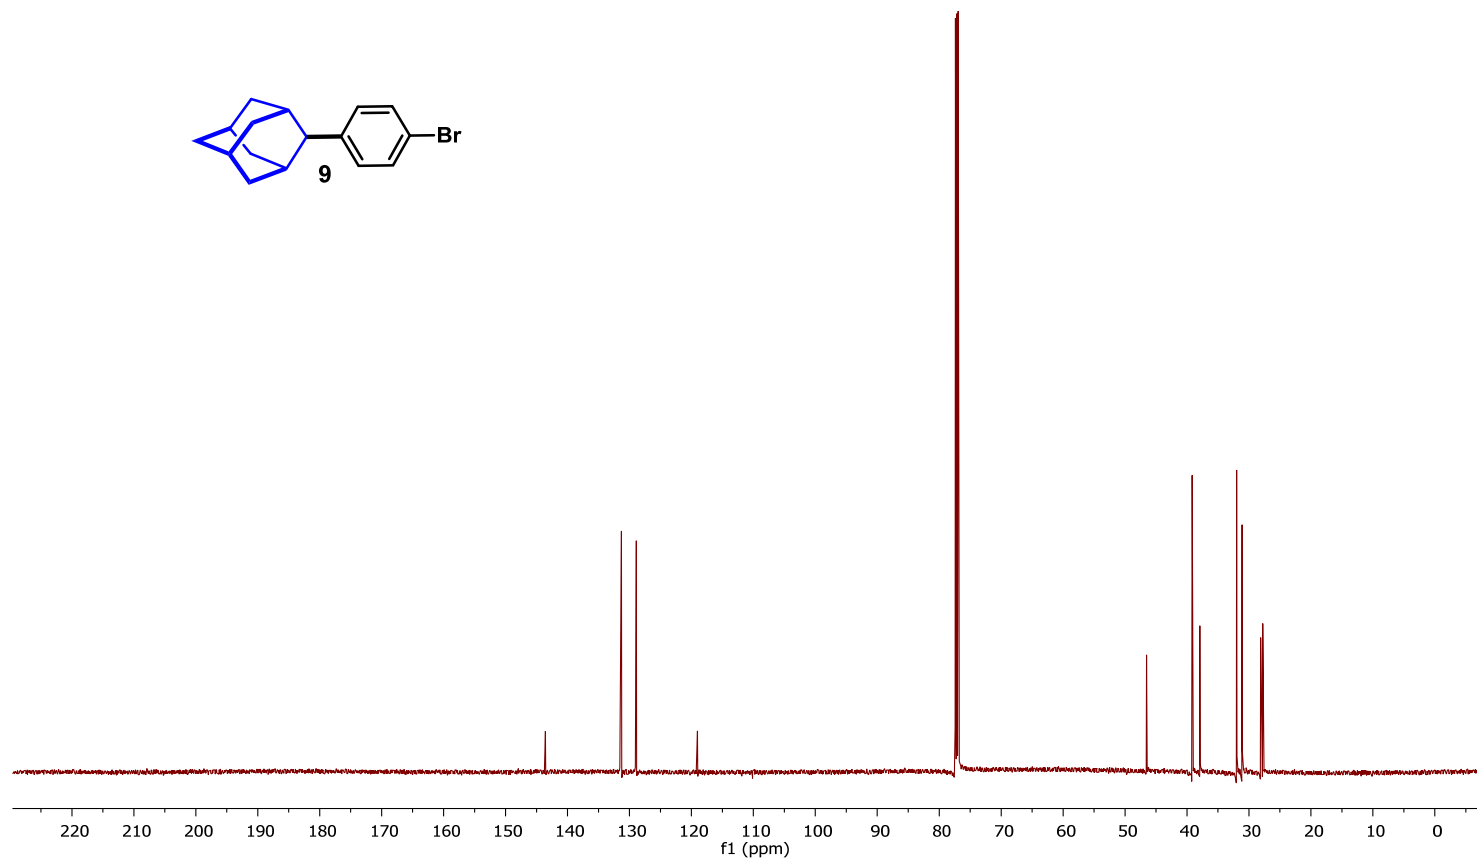

# Compound 10 $^1\text{H}$ NMR

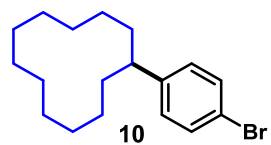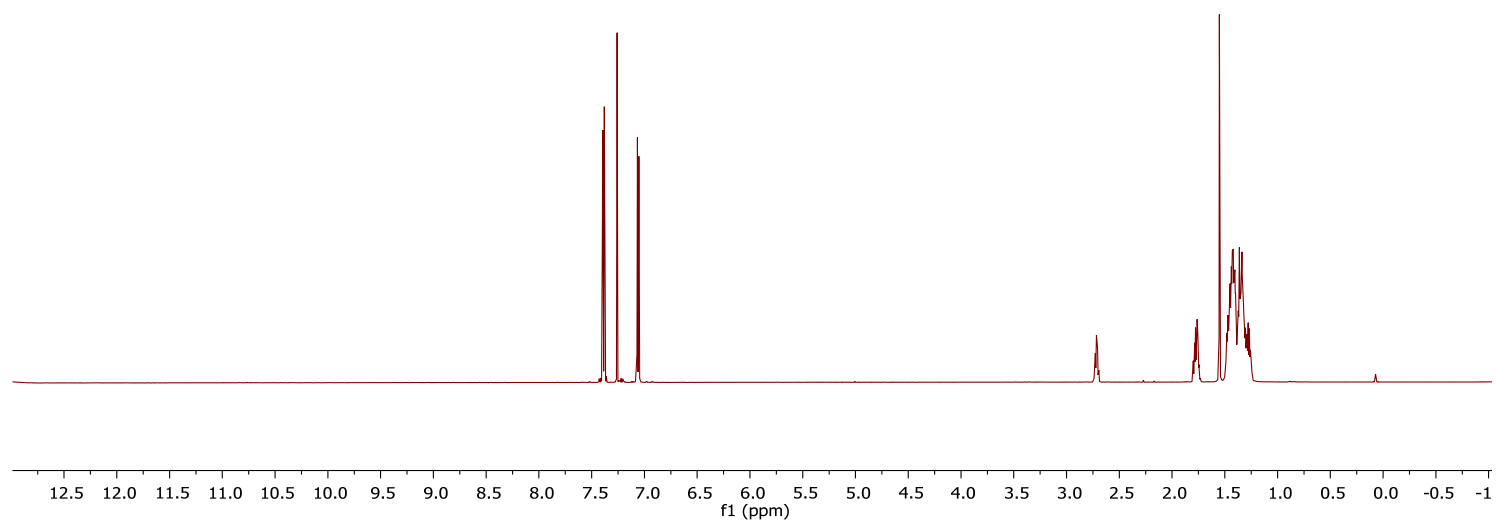

# Compound 10 $^{13}\text{C}$ NMR

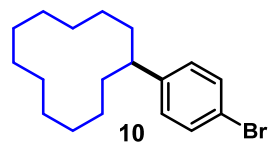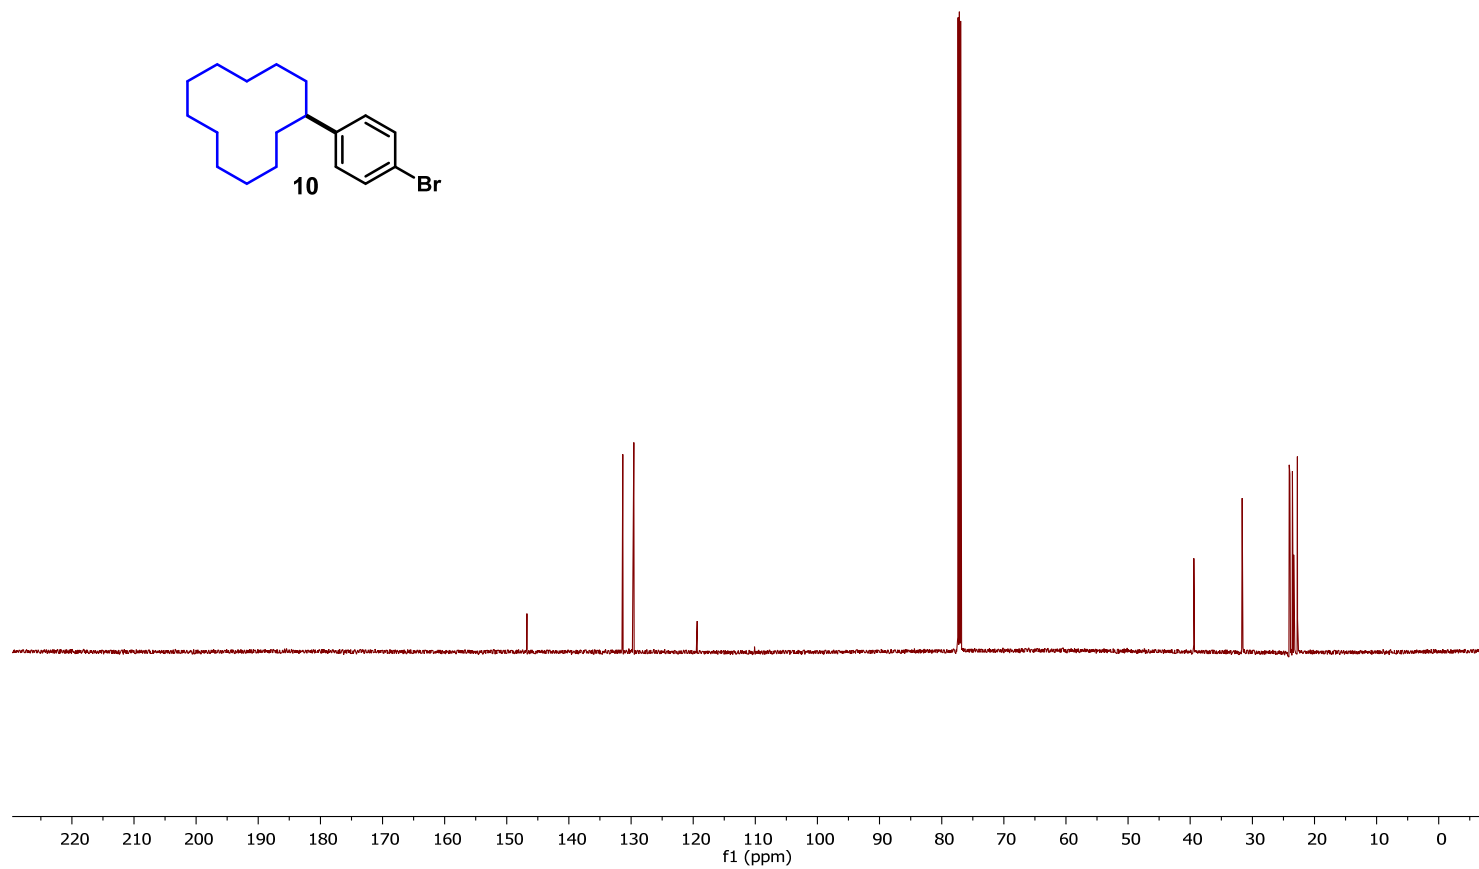

# Compound 11 <sup>1</sup>H NMR

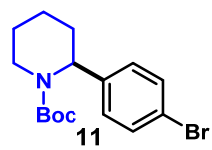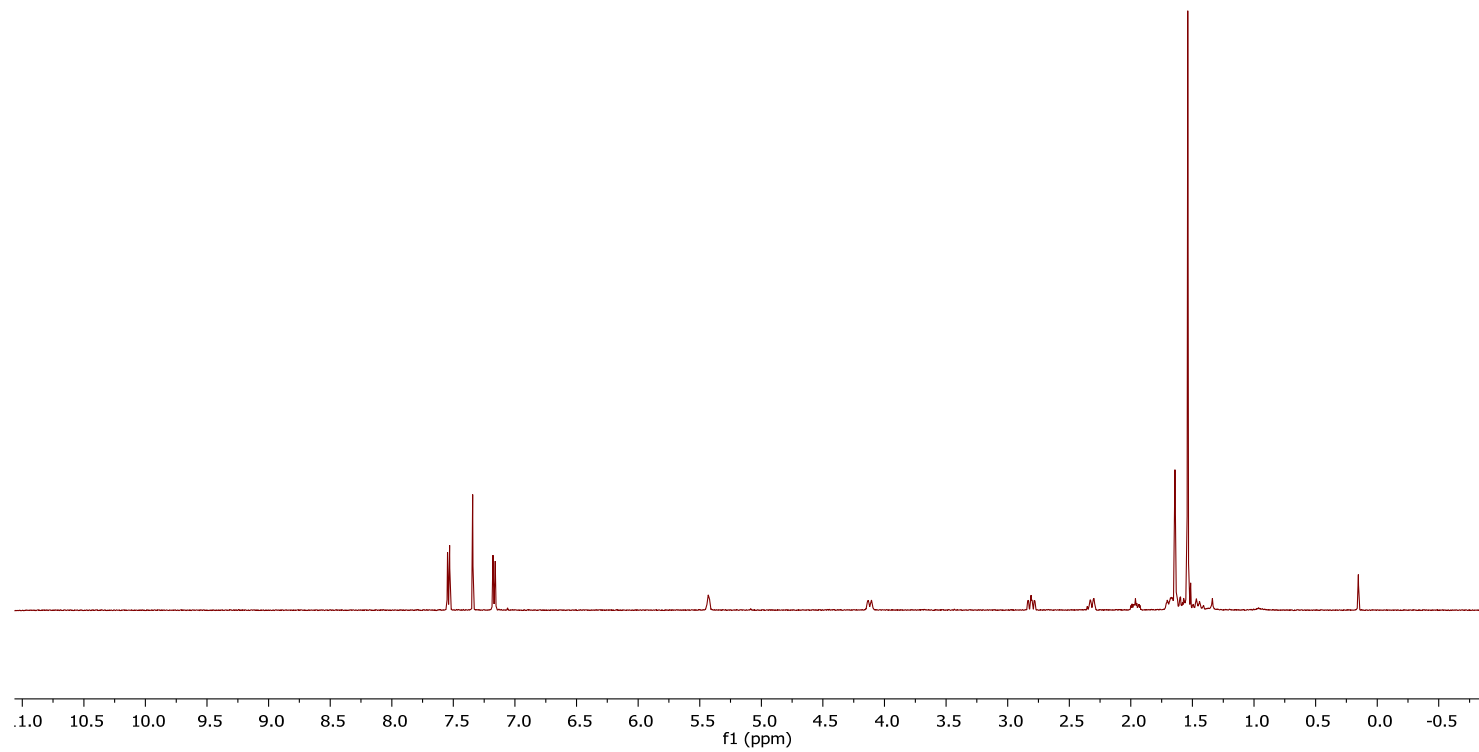

# Compound 11 <sup>13</sup>C NMR

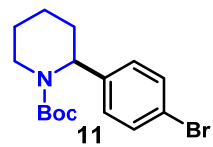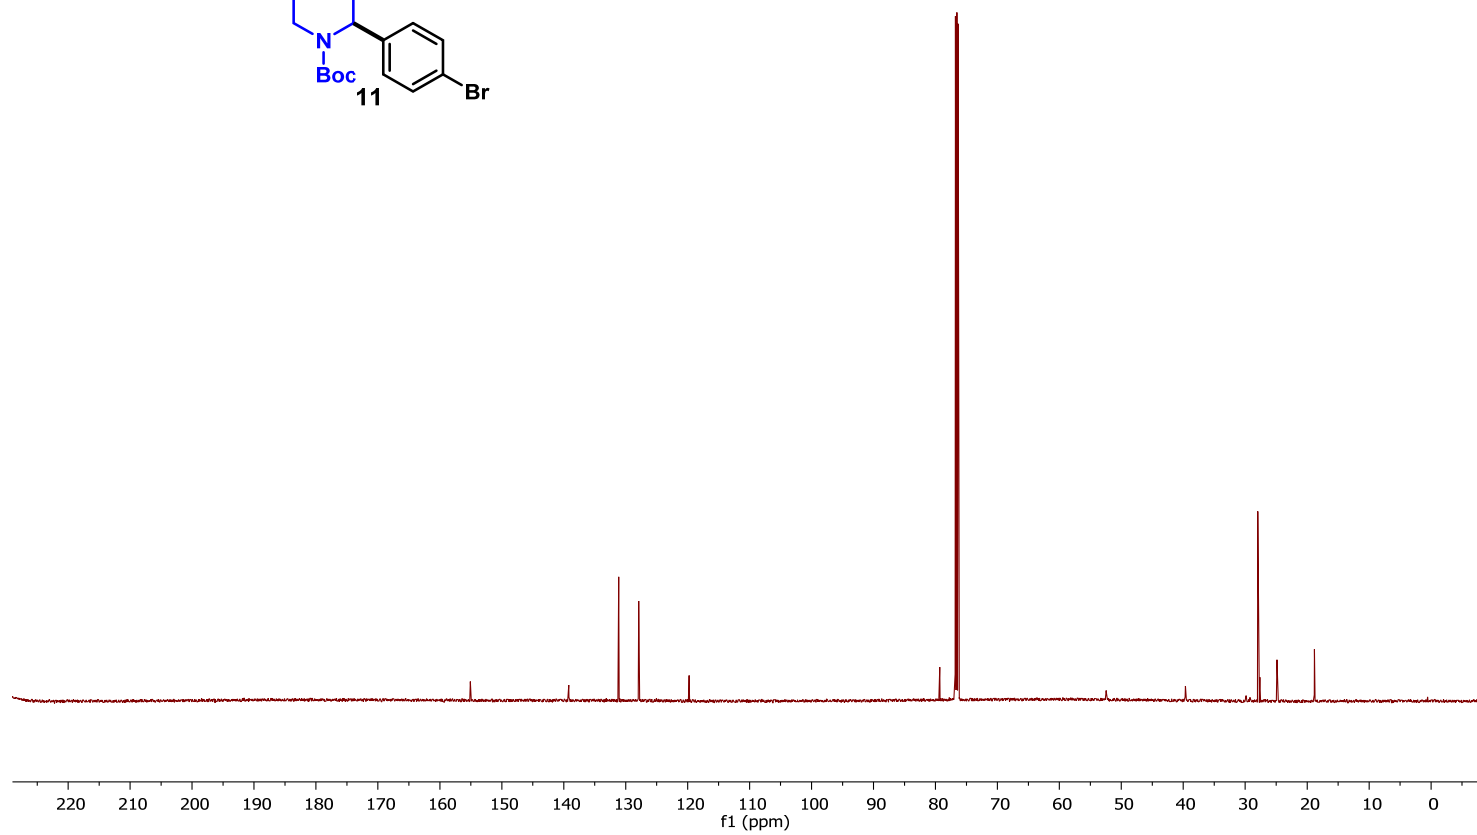

# Compound 12 <sup>1</sup>H NMR

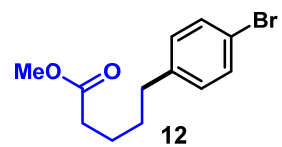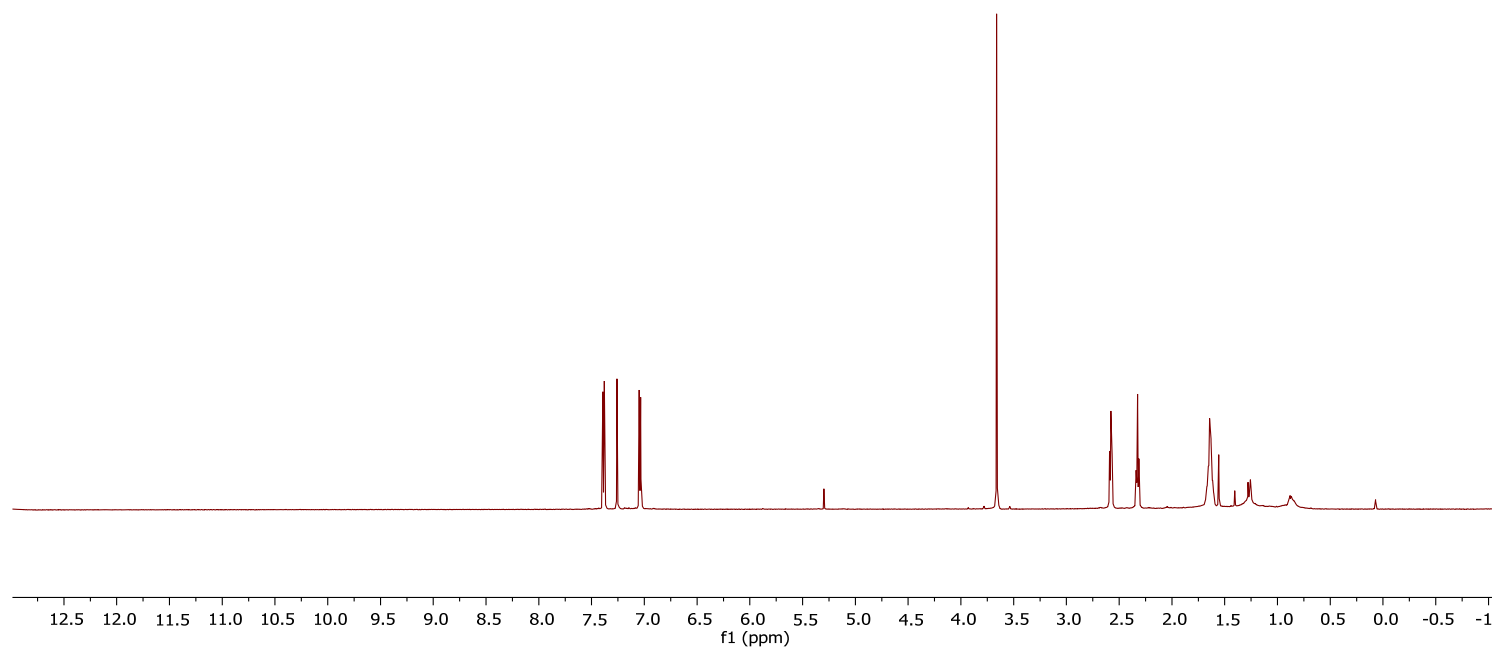

# Compound 12 <sup>13</sup>C NMR

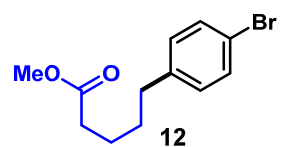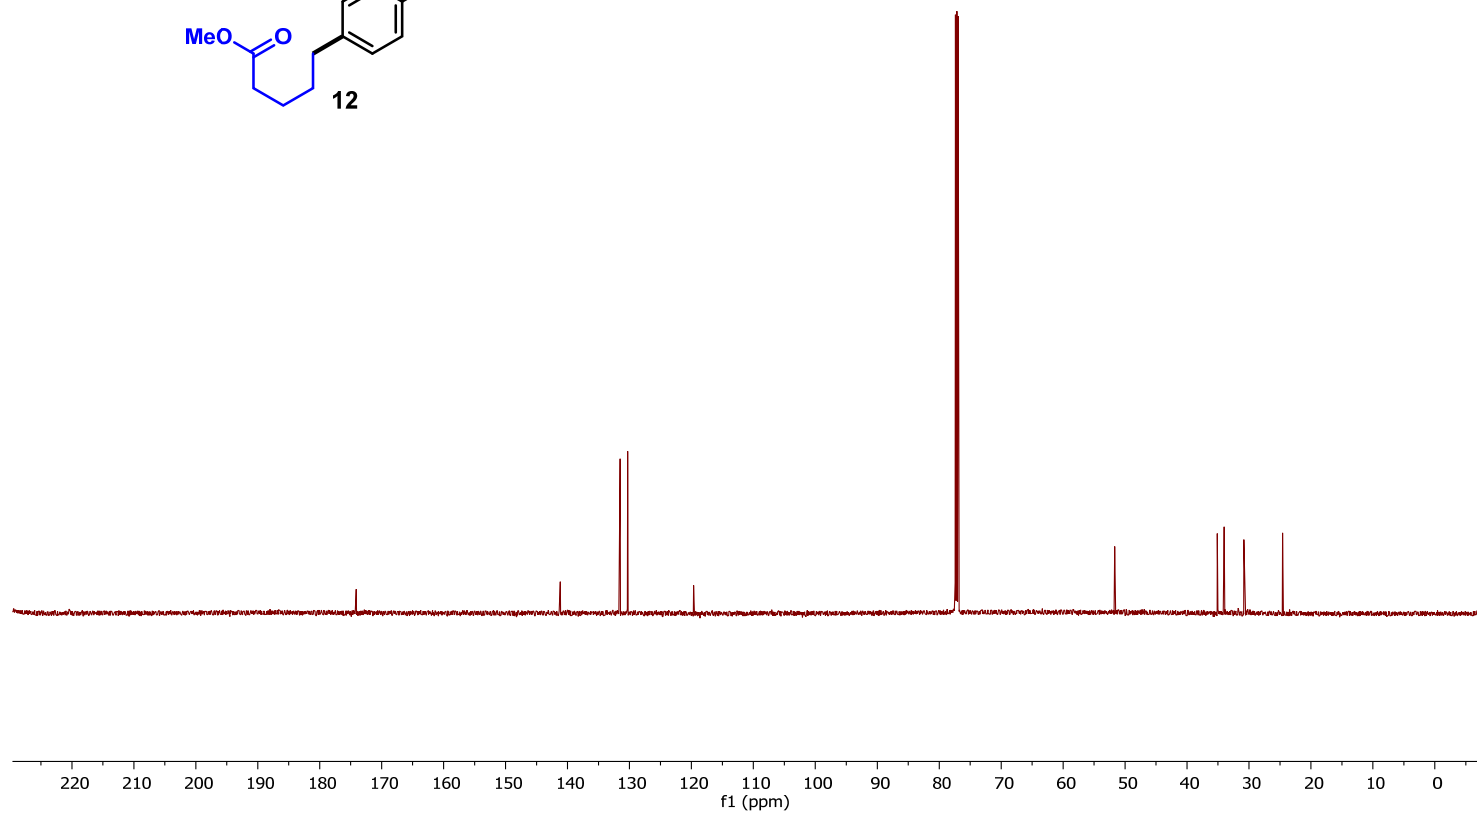



# Compound 13 <sup>1</sup>H NMR

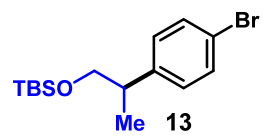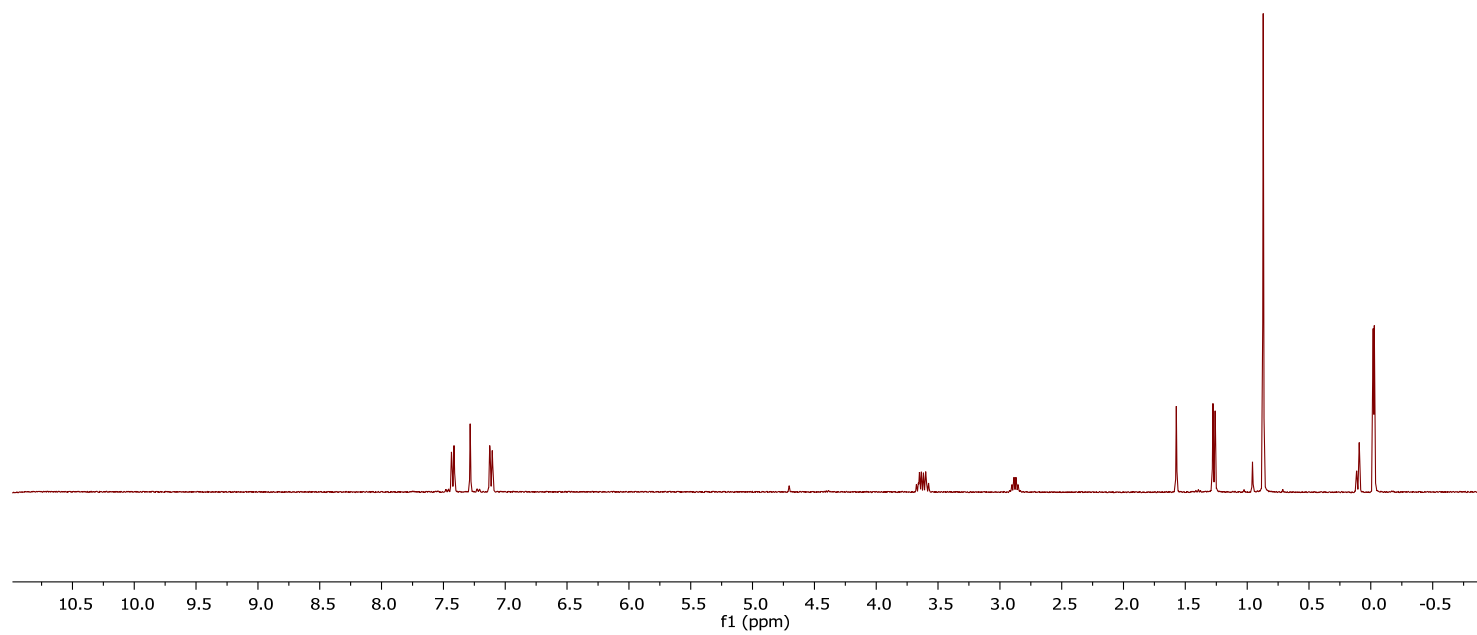

# Compound 13 $^{13}\text{C}$ NMR

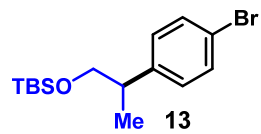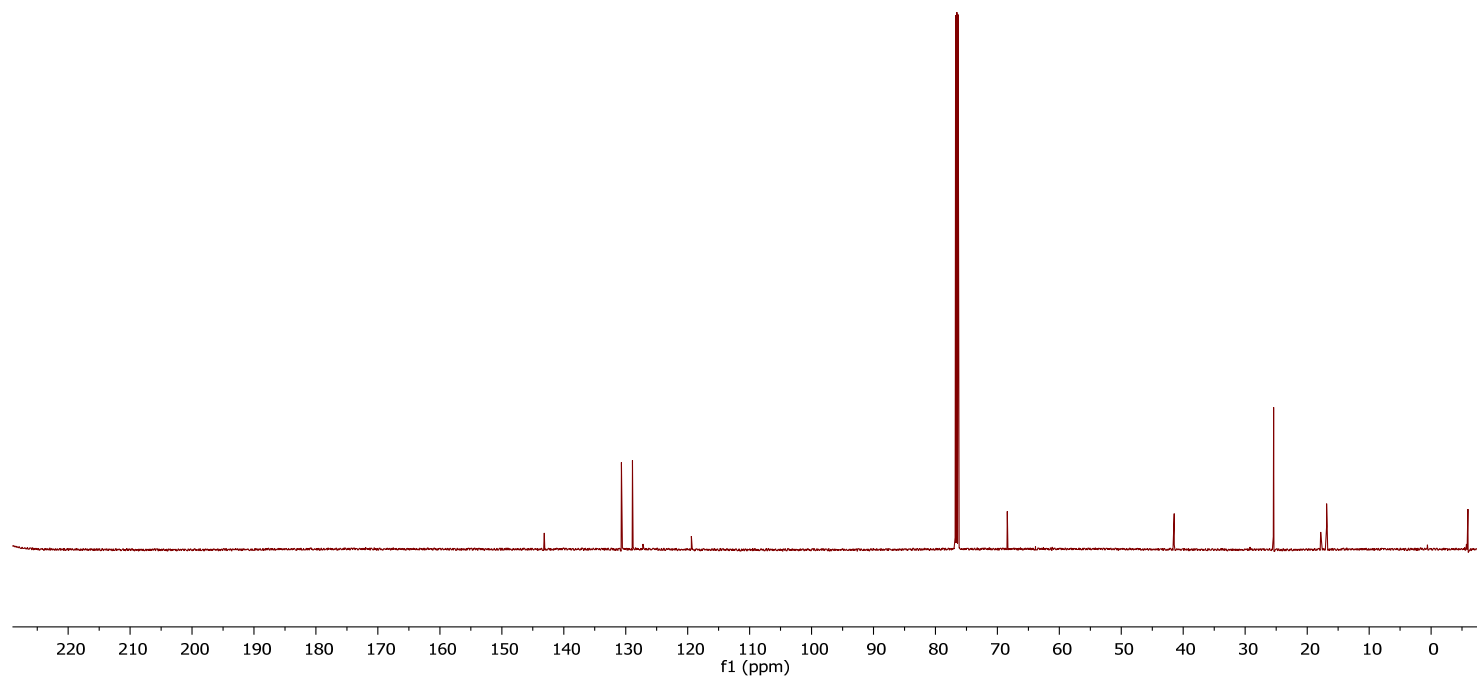

# Compound 14 $^1\text{H}$ NMR

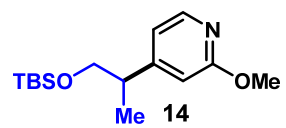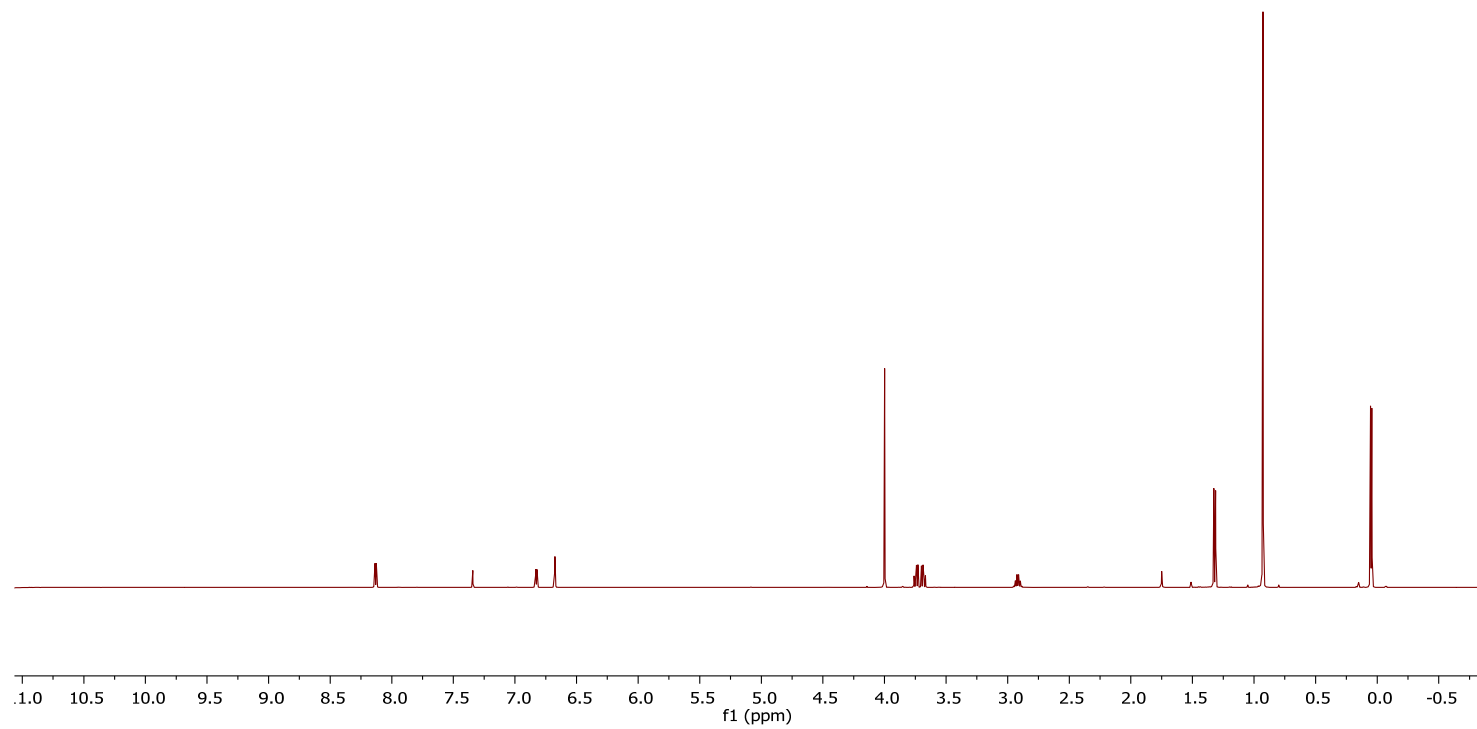



# Compound 15 <sup>1</sup>H NMR

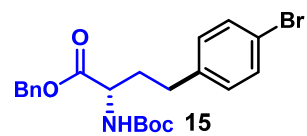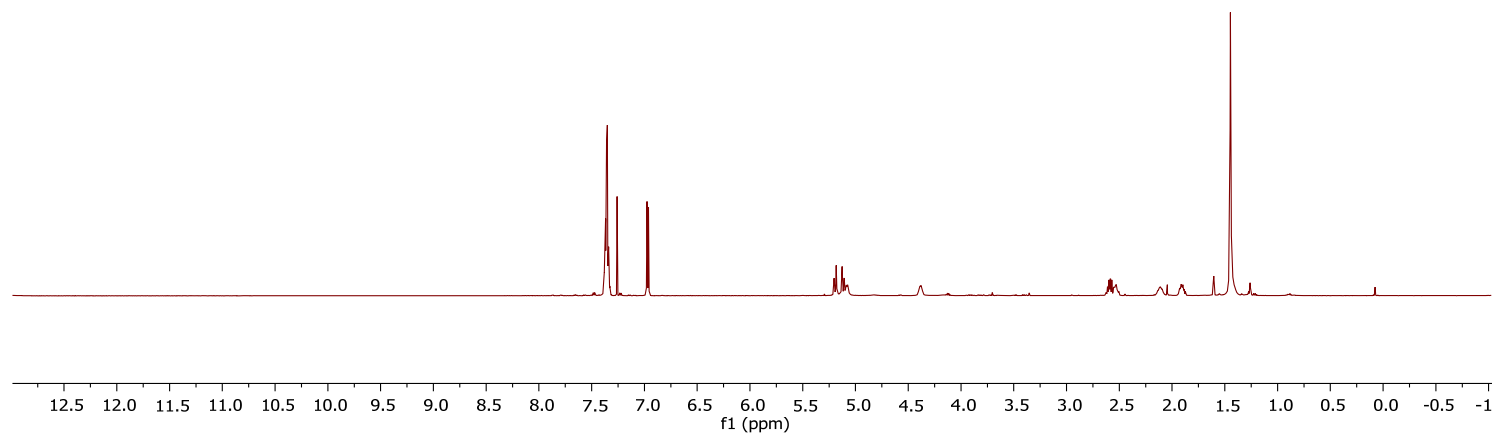

# Compound 15 $^{13}\text{C}$ NMR

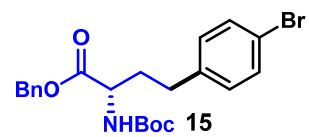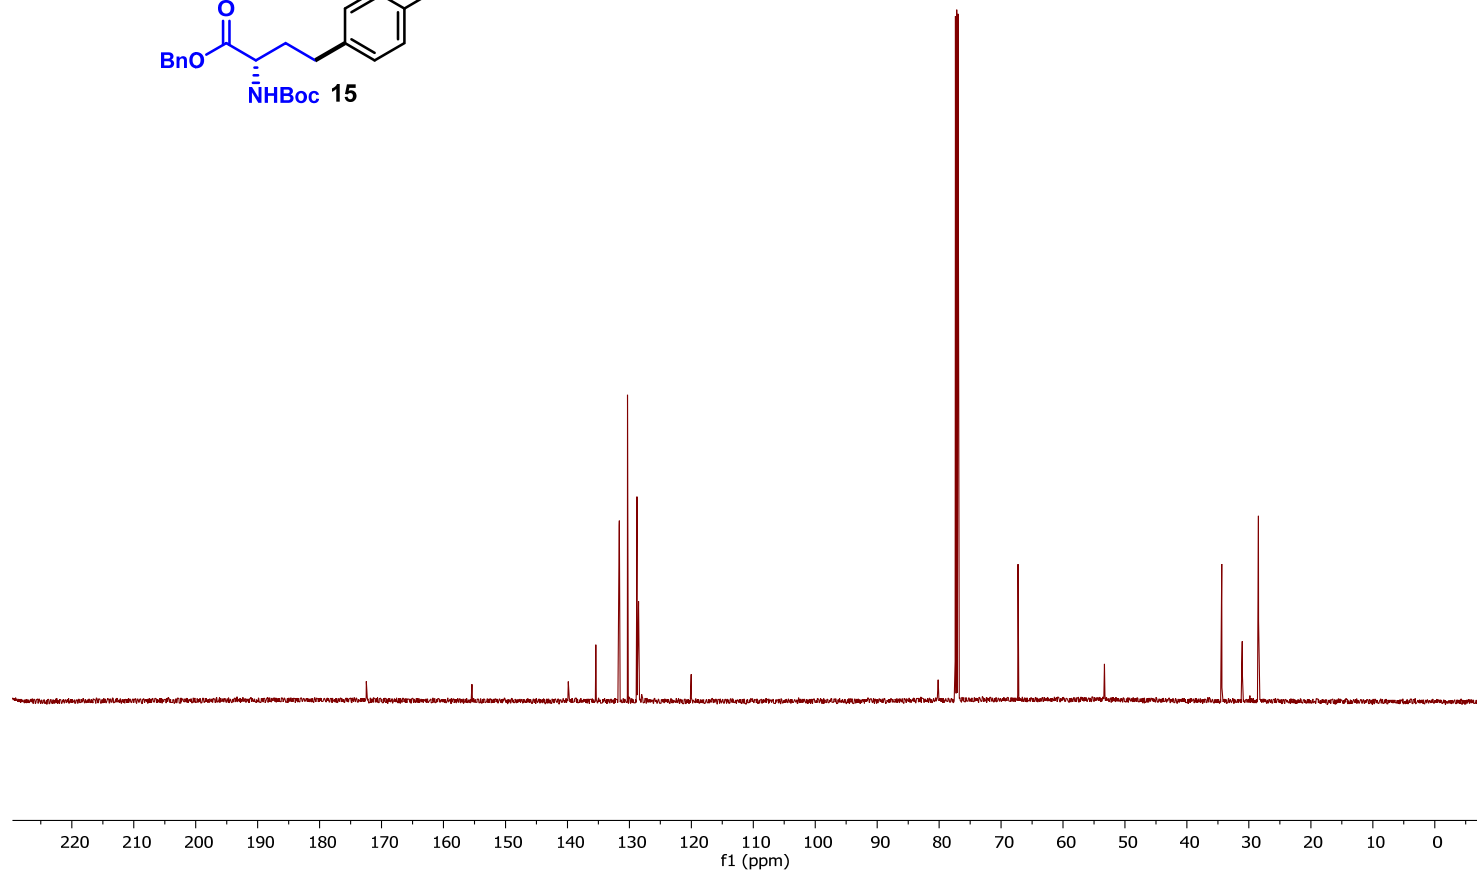

# Compound 16 <sup>1</sup>H NMR

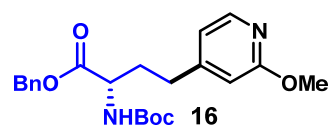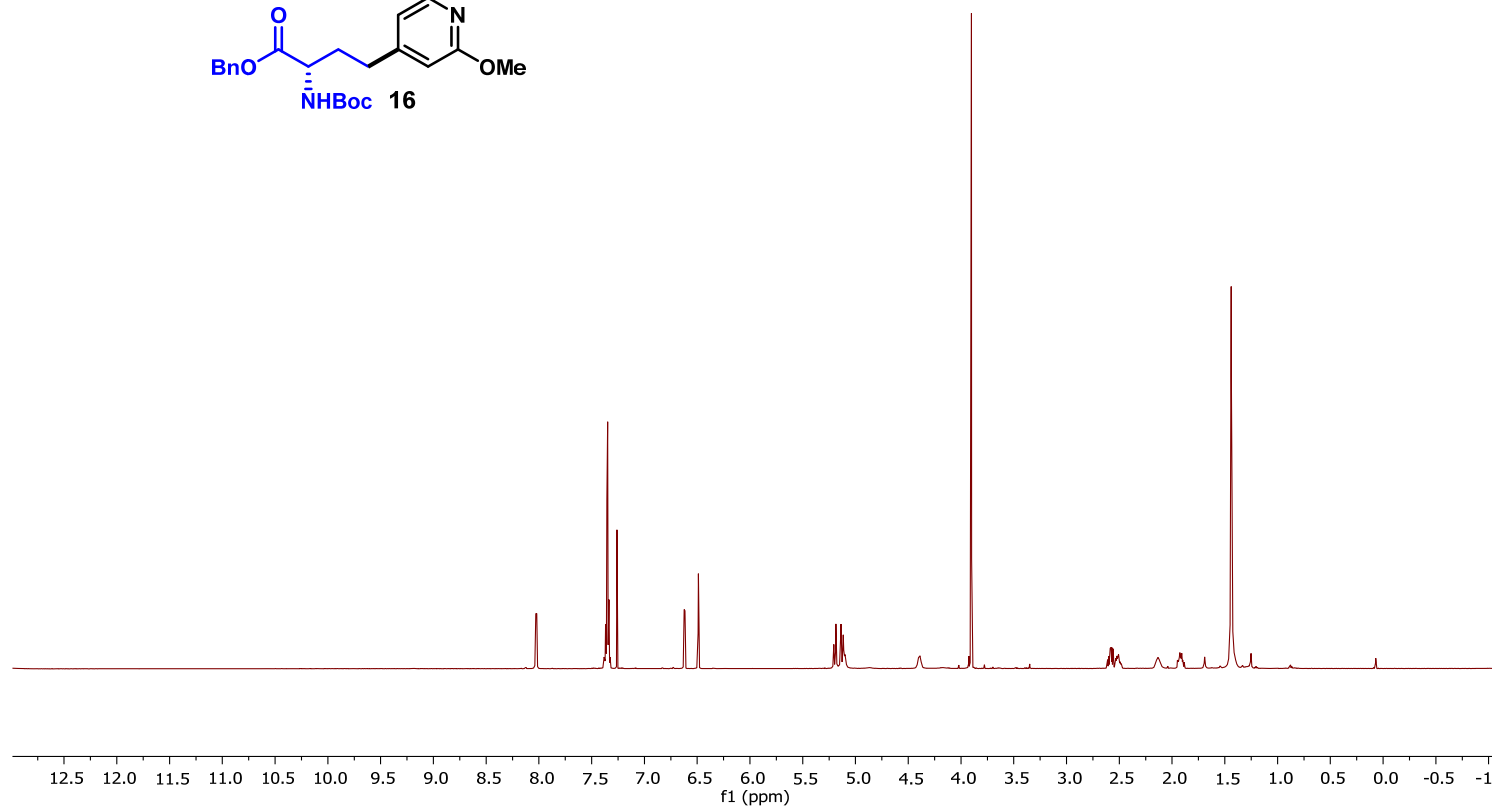

# Compound 16 <sup>13</sup>C NMR

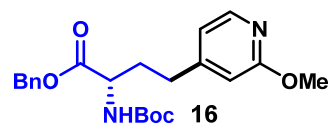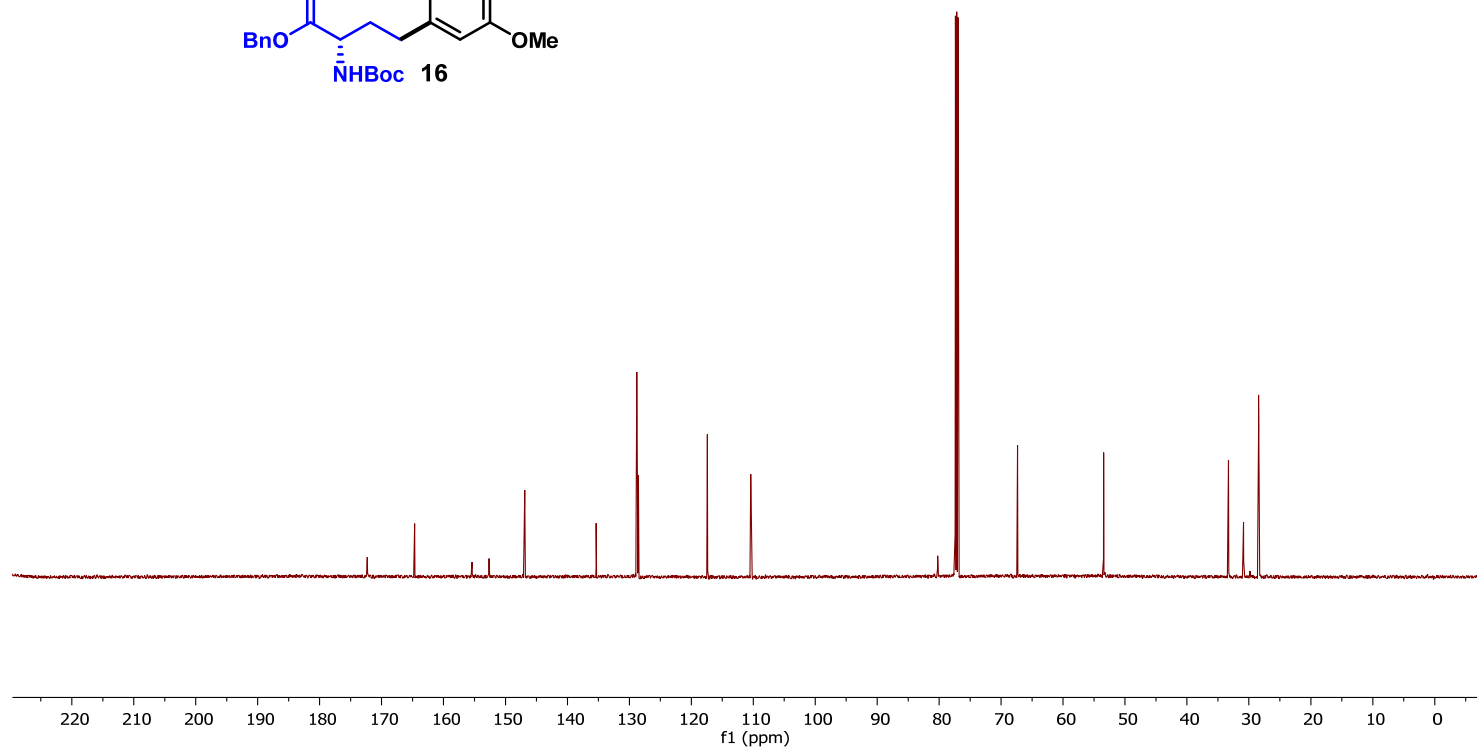



# Compound 17 <sup>1</sup>H NMR

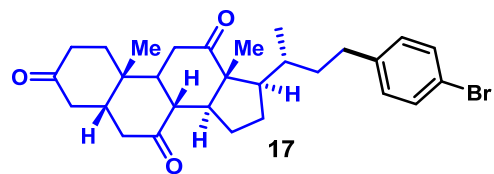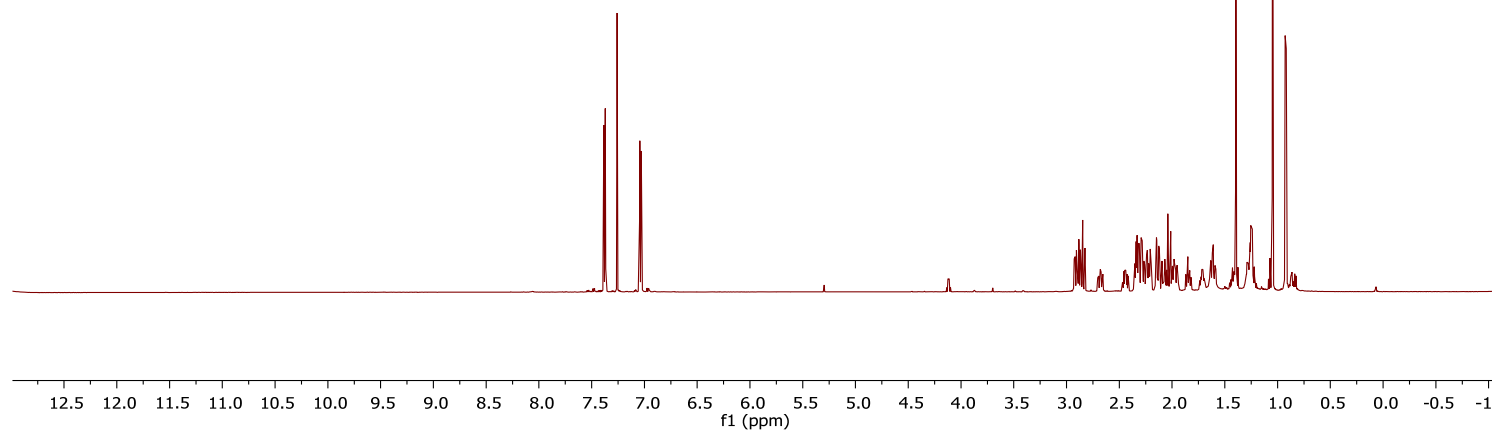

# Compound 17 <sup>13</sup>C NMR

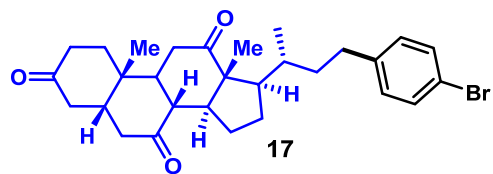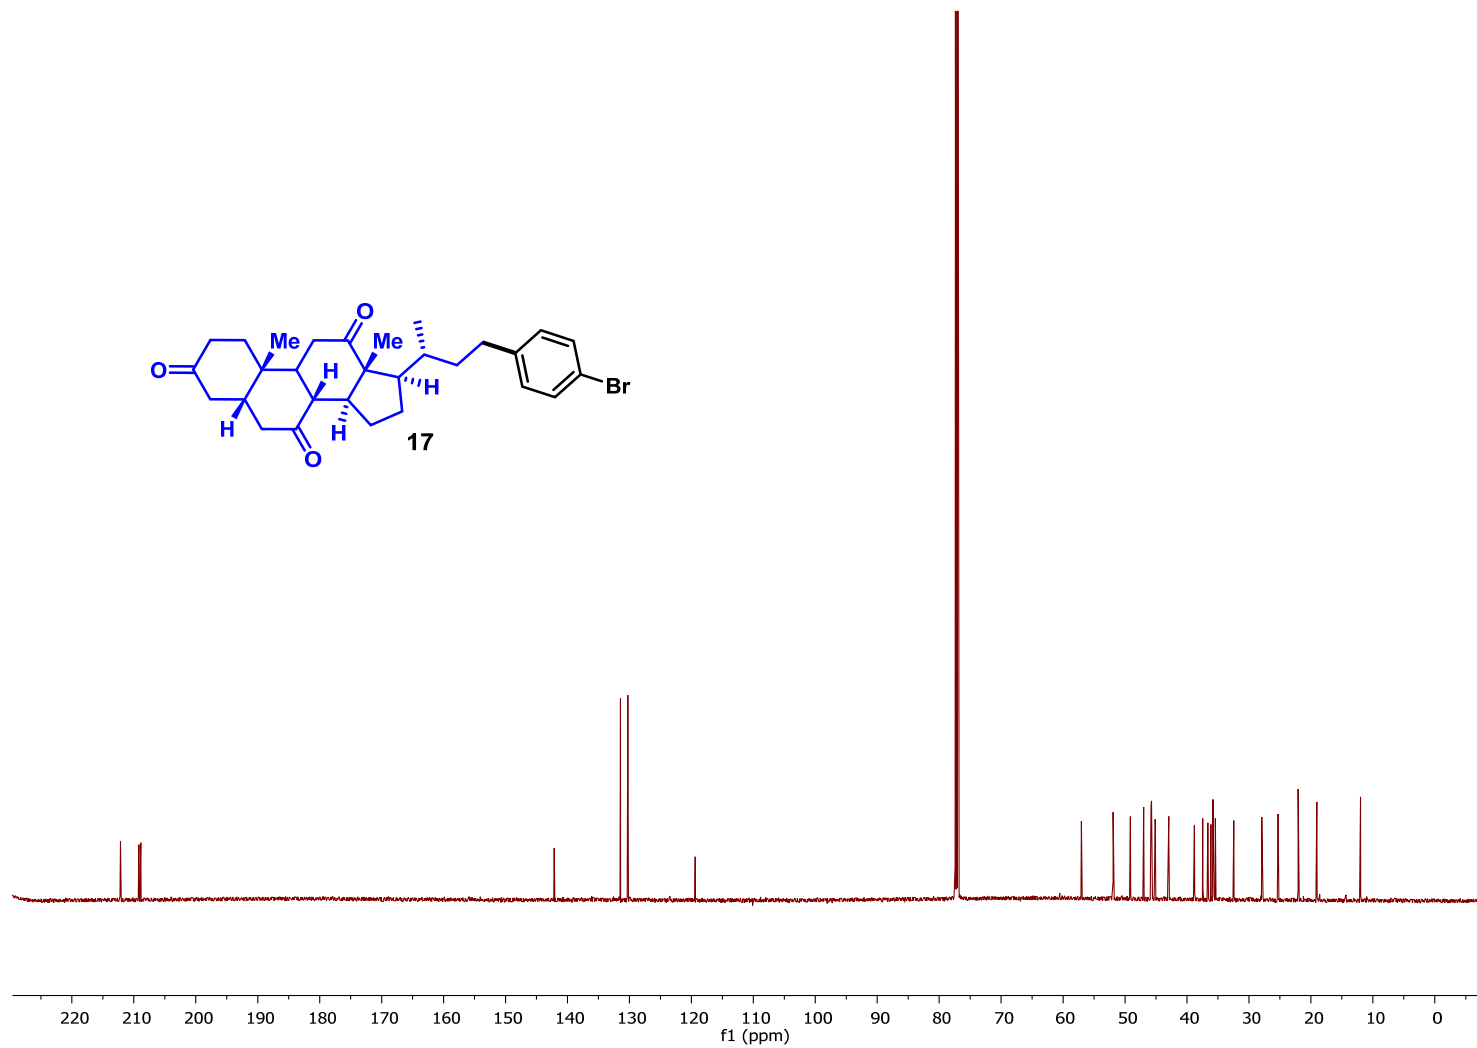

# Compound 18 $^1\text{H}$ NMR

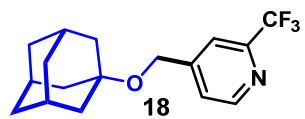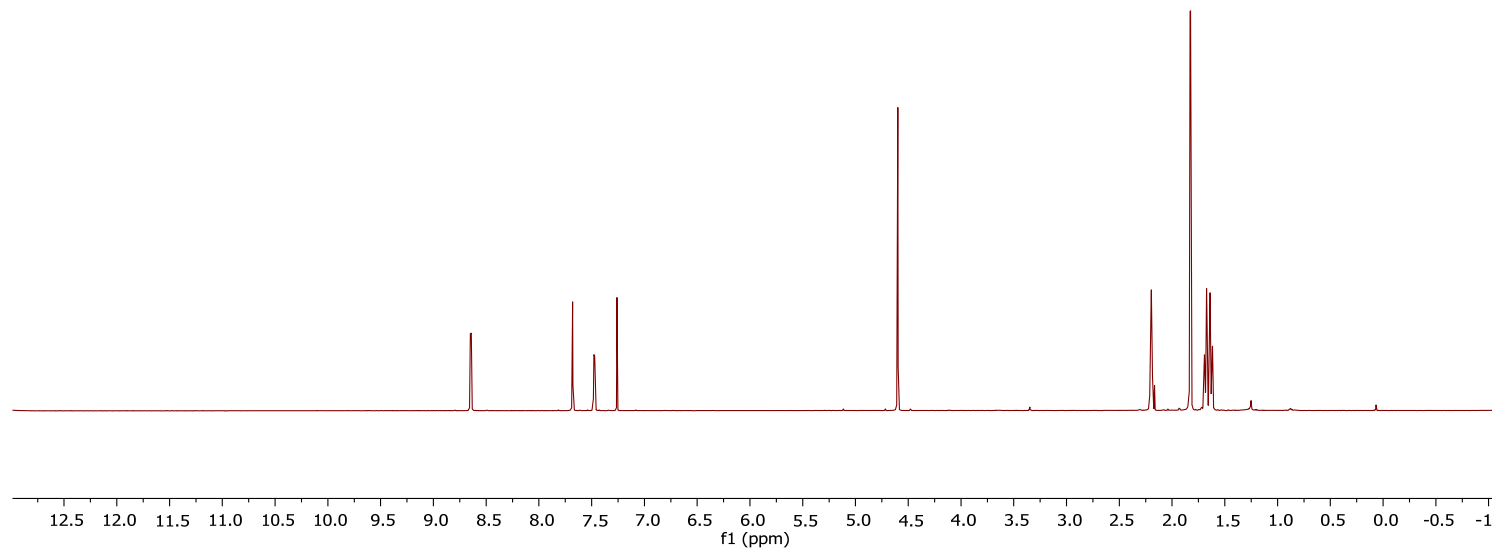

# Compound 18 $^{13}\text{C}$ NMR

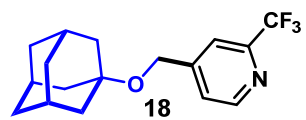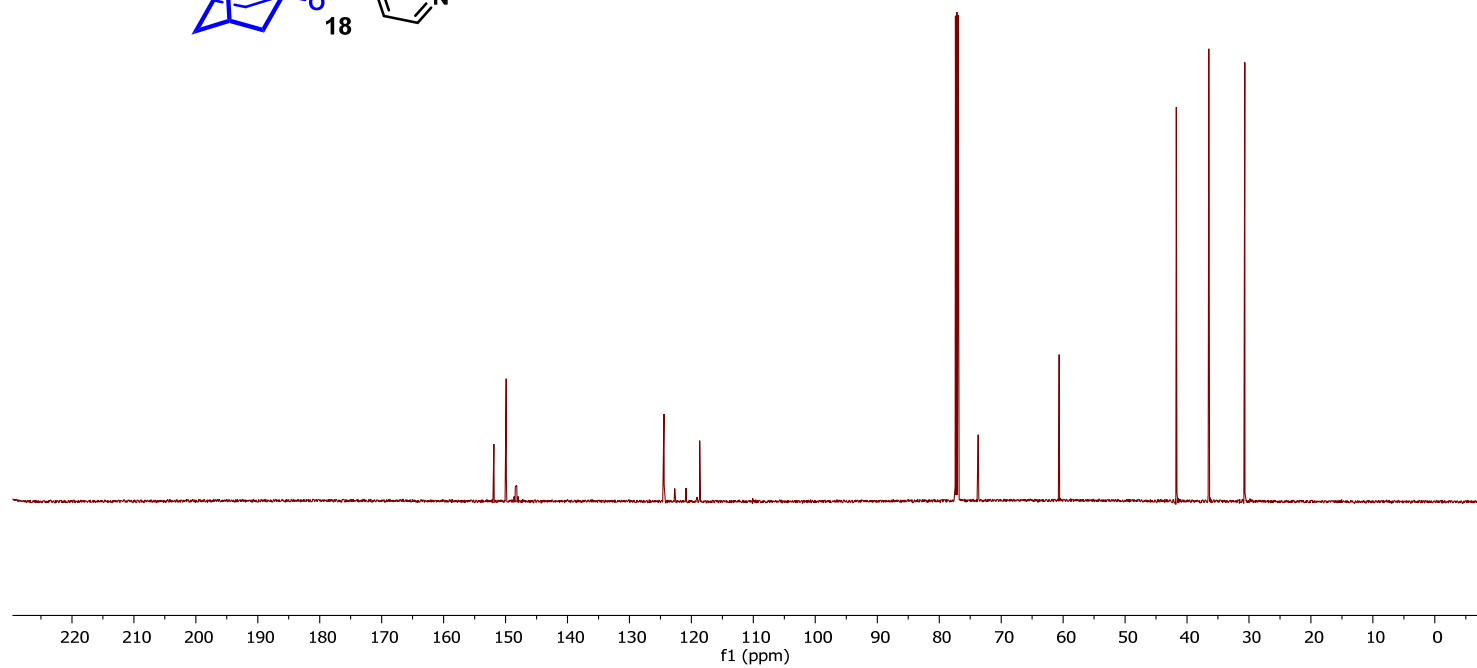

# Compound 18 $^{19}\text{F}$ NMR

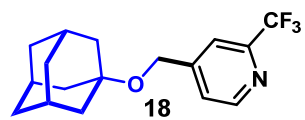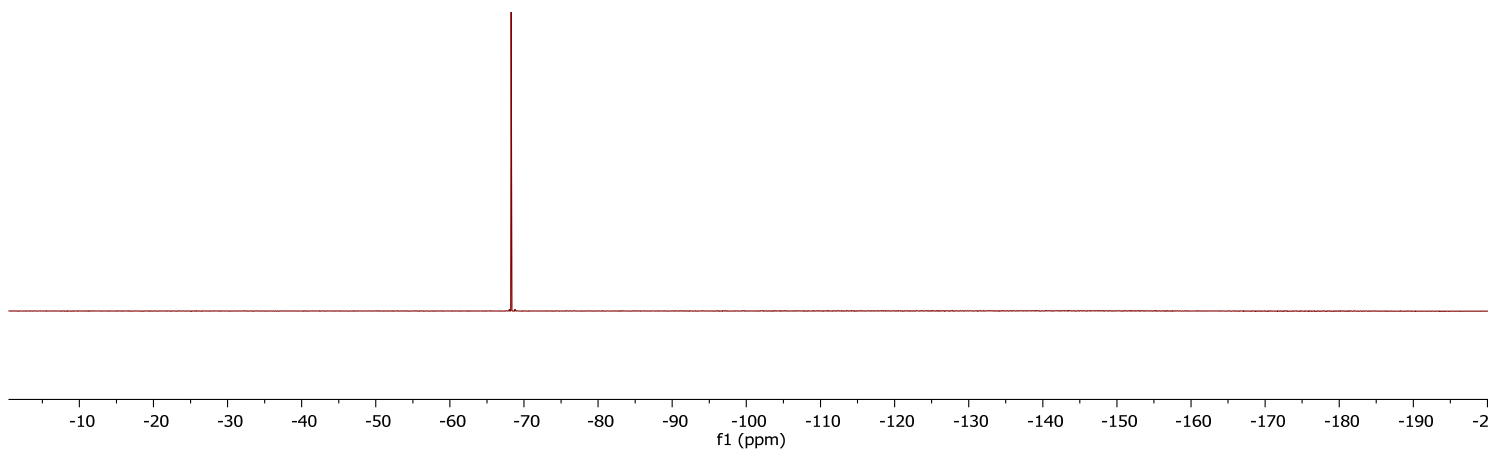

# Compound 19 <sup>1</sup>H NMR

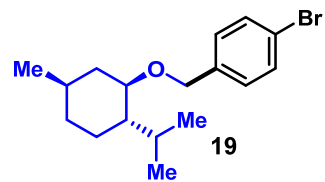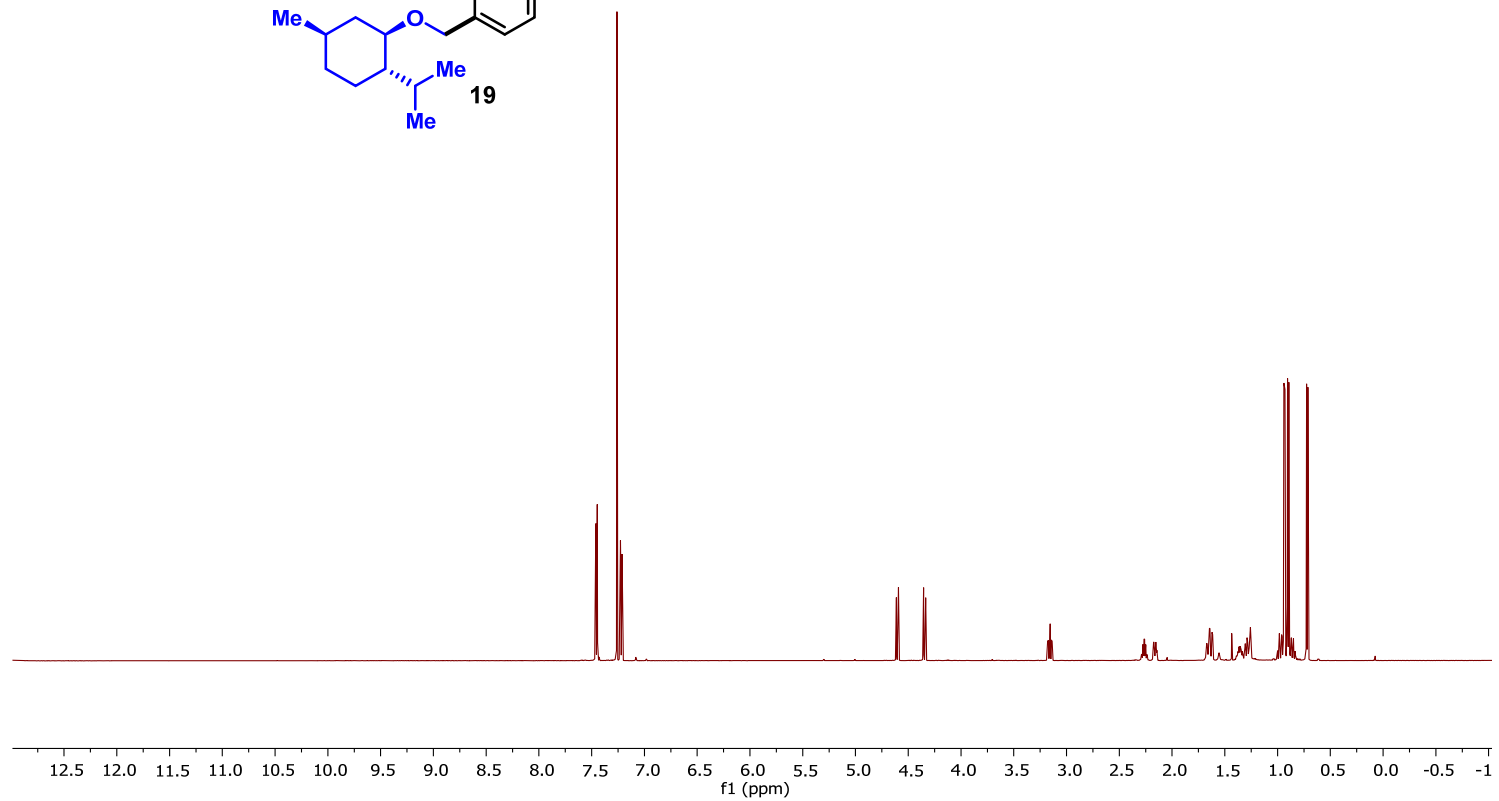

# Compound 19 <sup>13</sup>C NMR

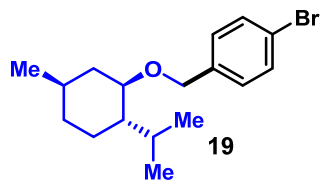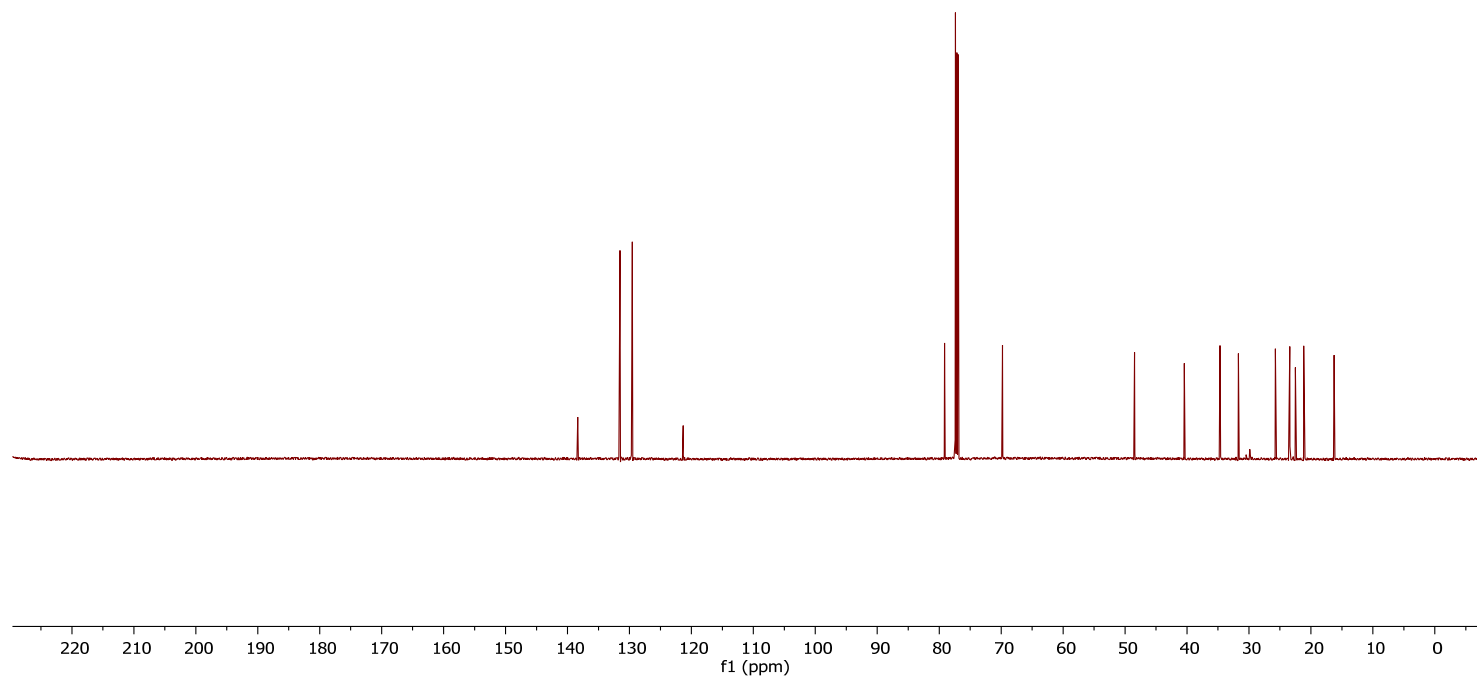

# Compound 20 <sup>1</sup>H NMR

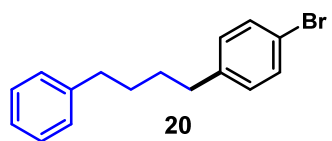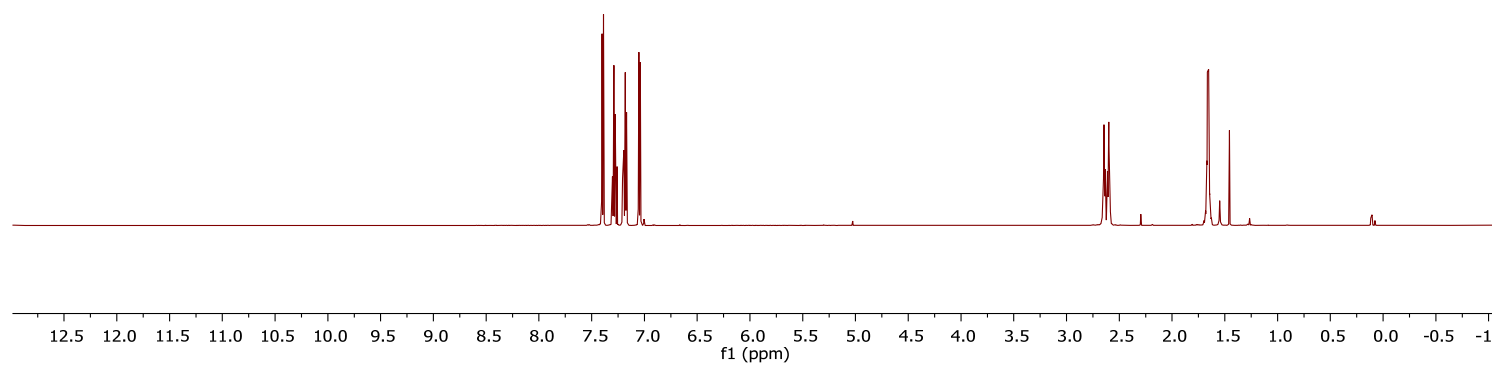



# Compound 20 $^{13}\text{C}$ NMR

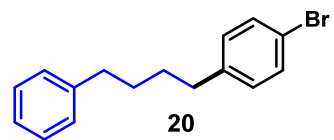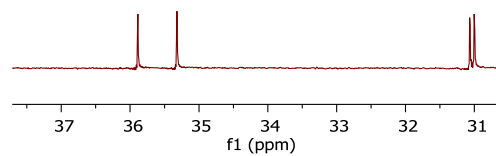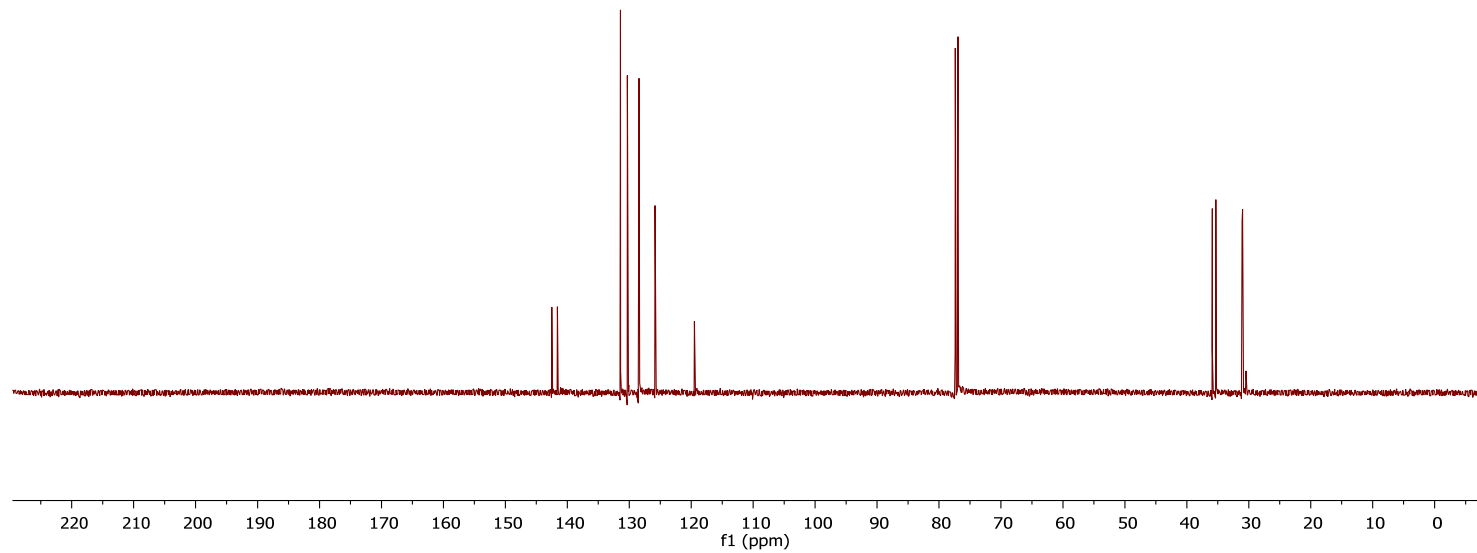

# Compound 21 <sup>1</sup>H NMR

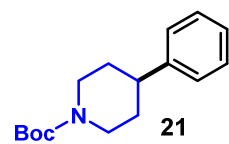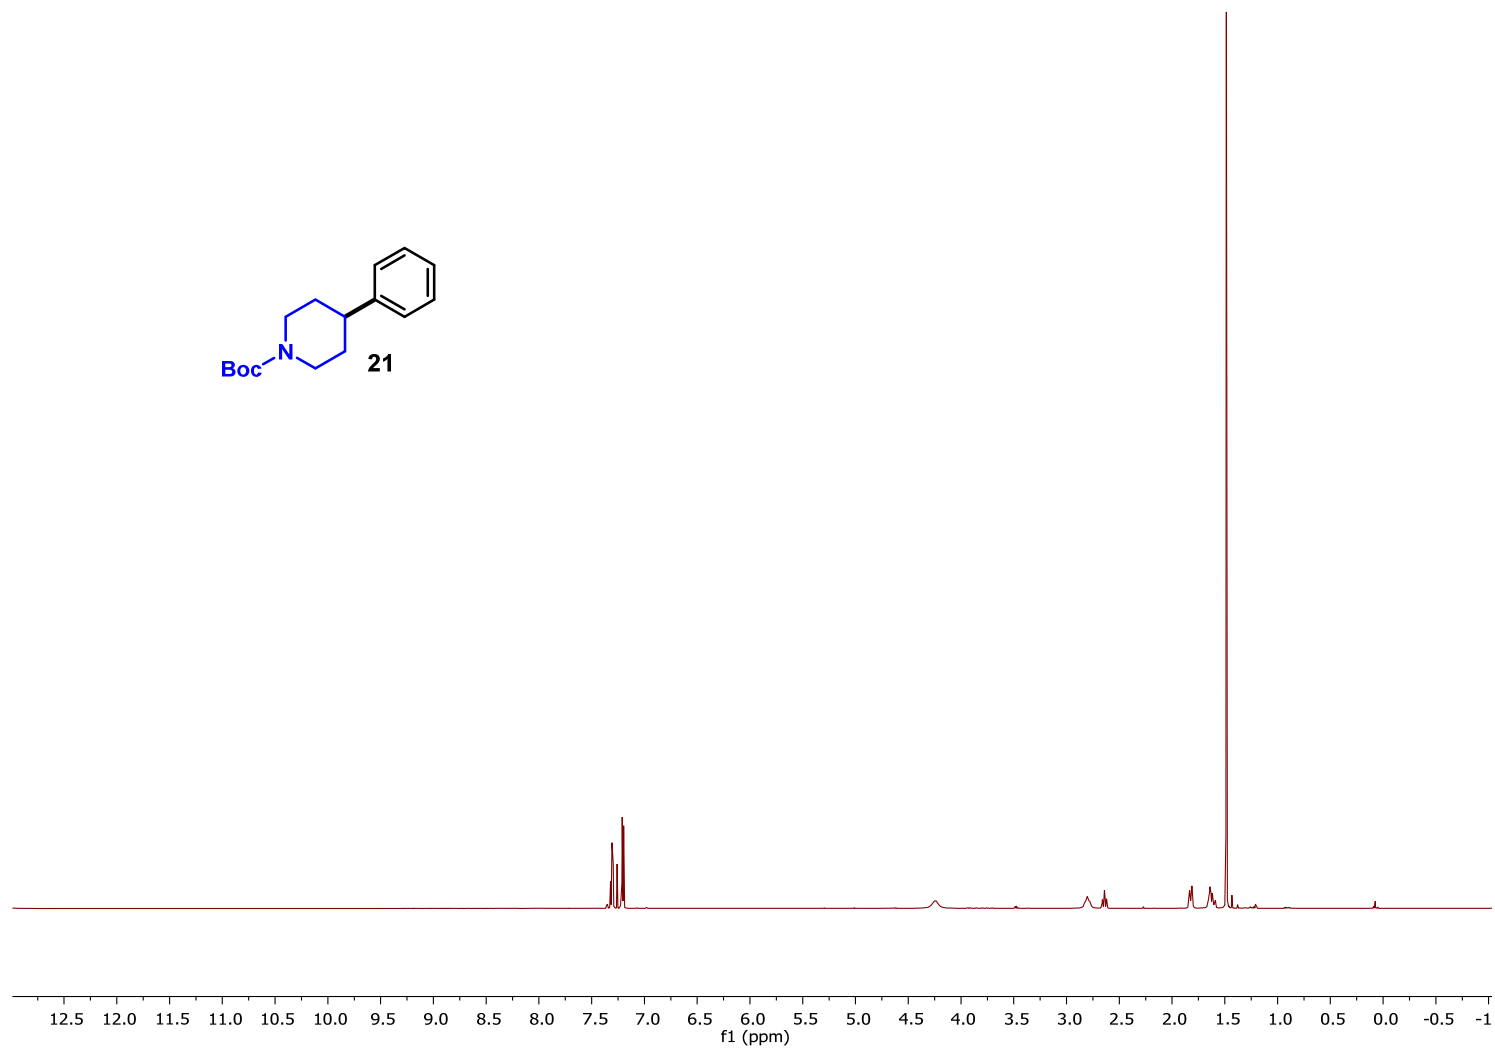

# Compound 21 $^{13}\text{C}$ NMR

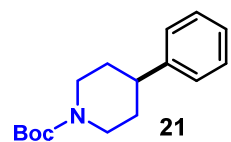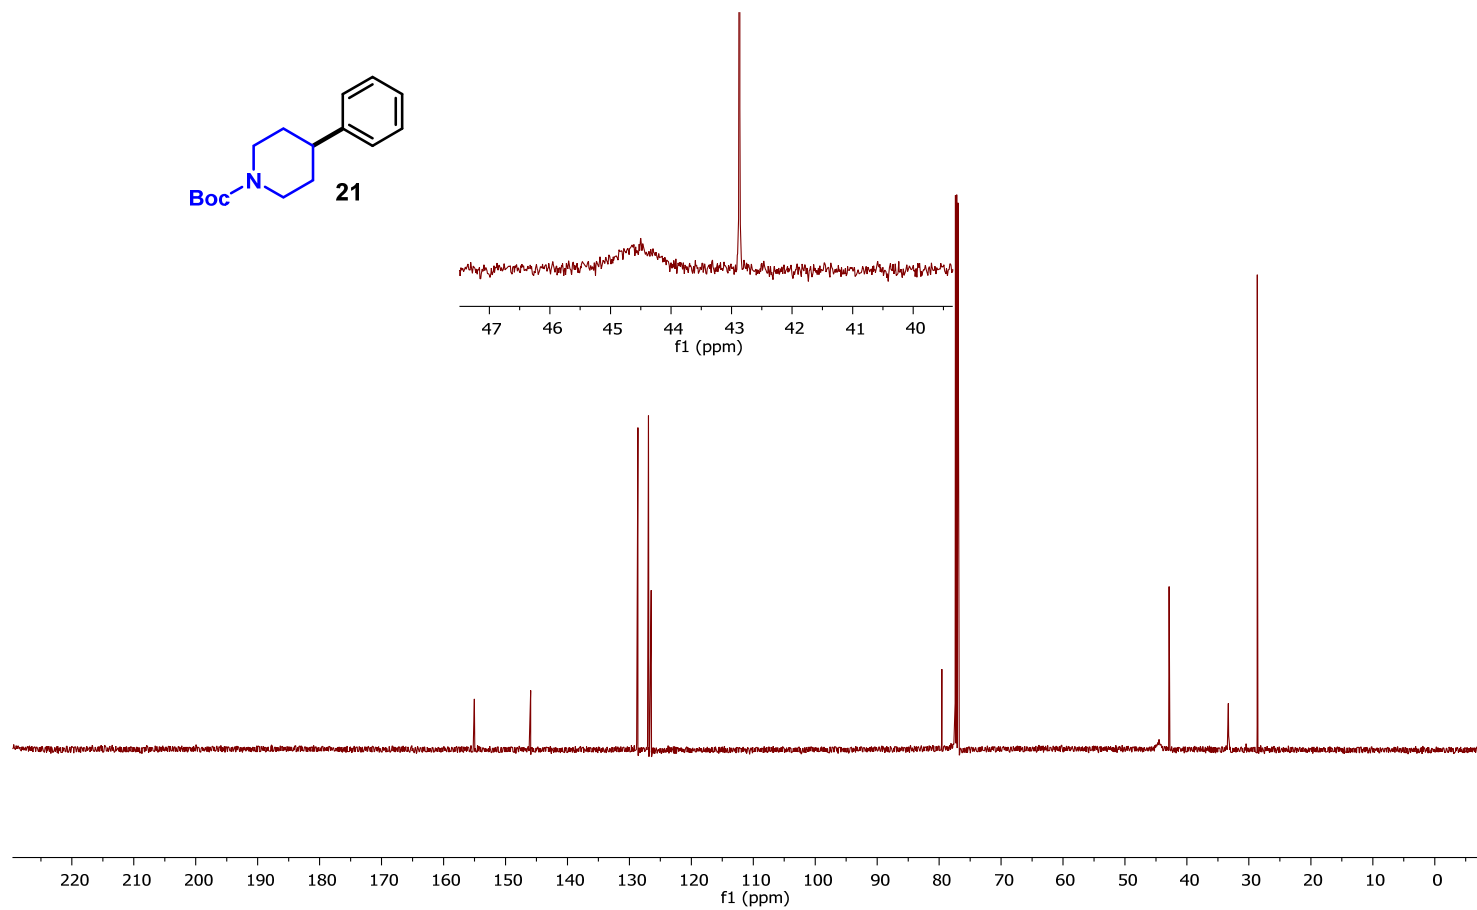

Compound 22  $^1\text{H}$  NMR

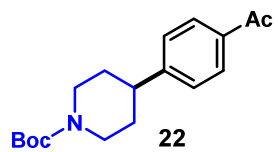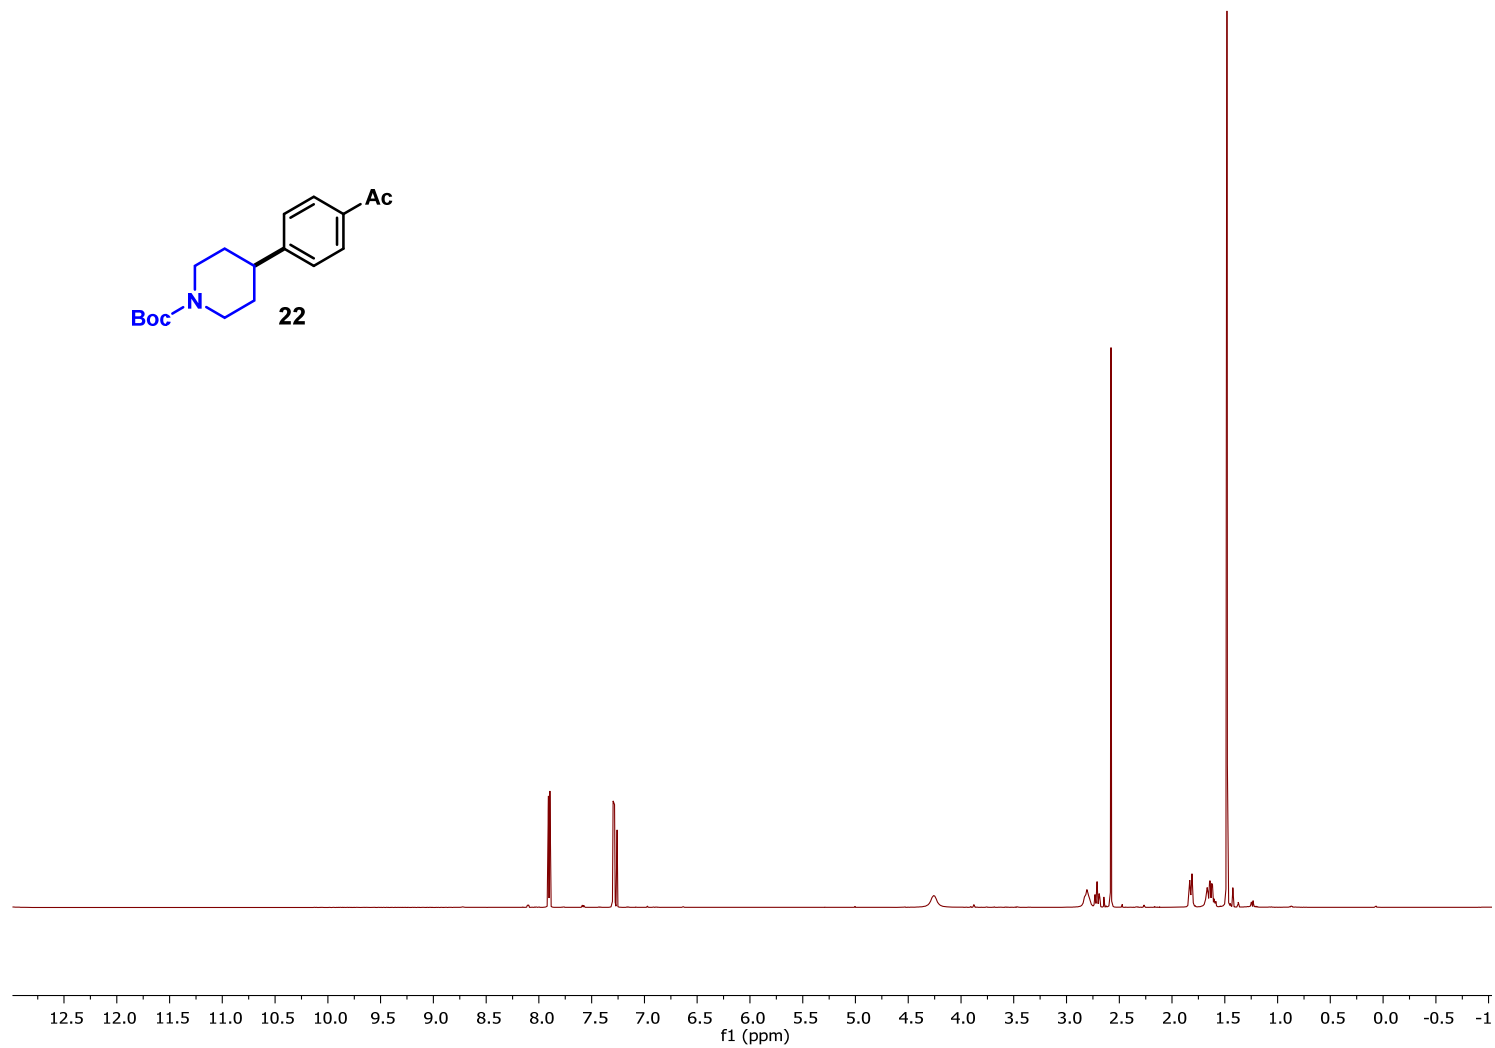

# Compound 22 <sup>13</sup>C NMR

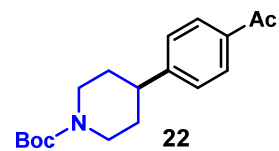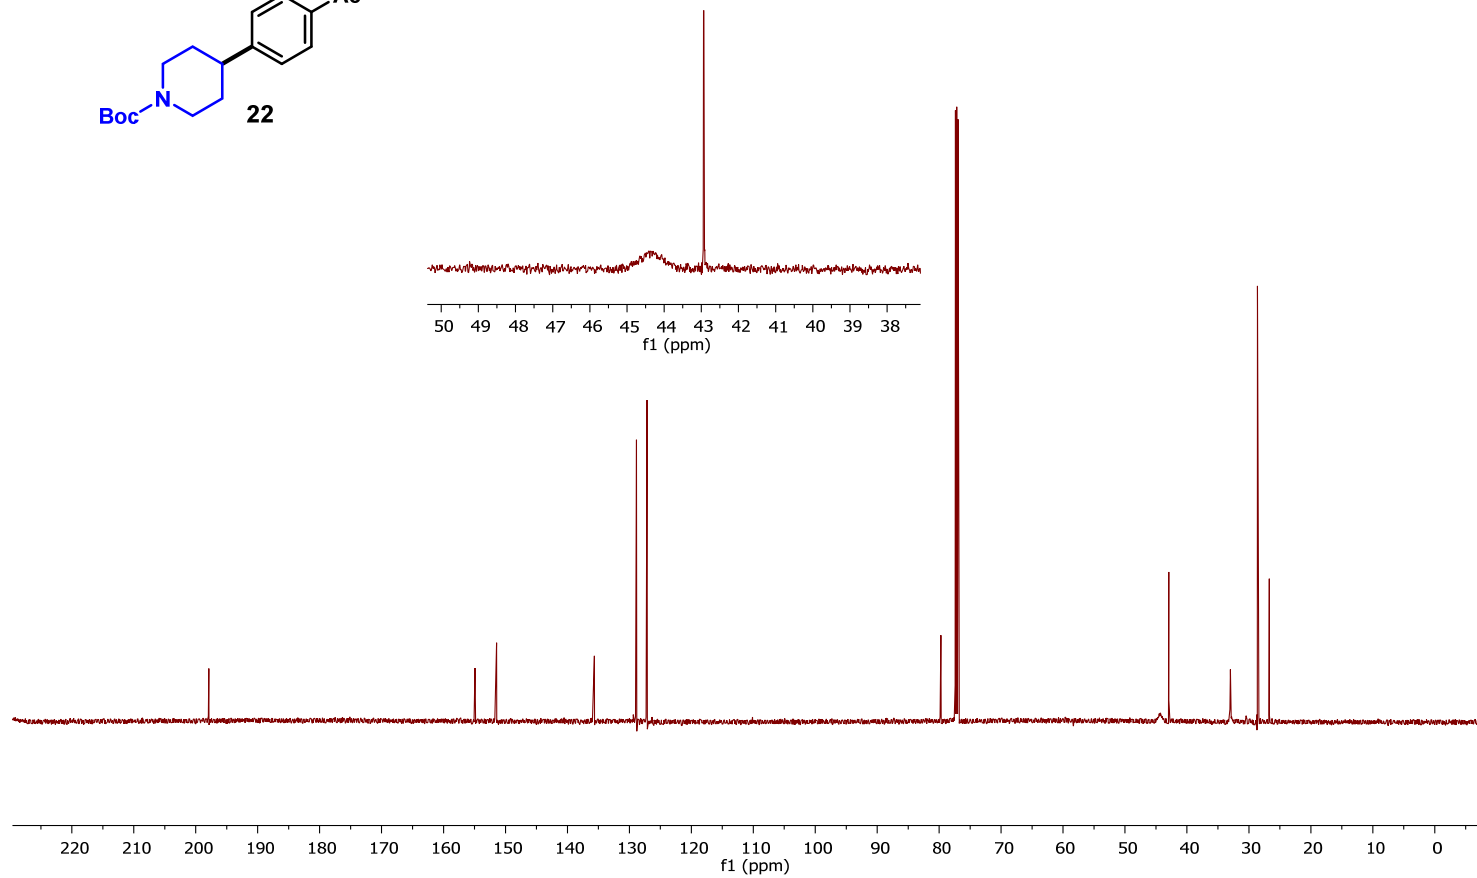

# Compound 23 <sup>1</sup>H NMR

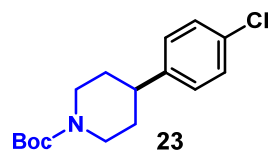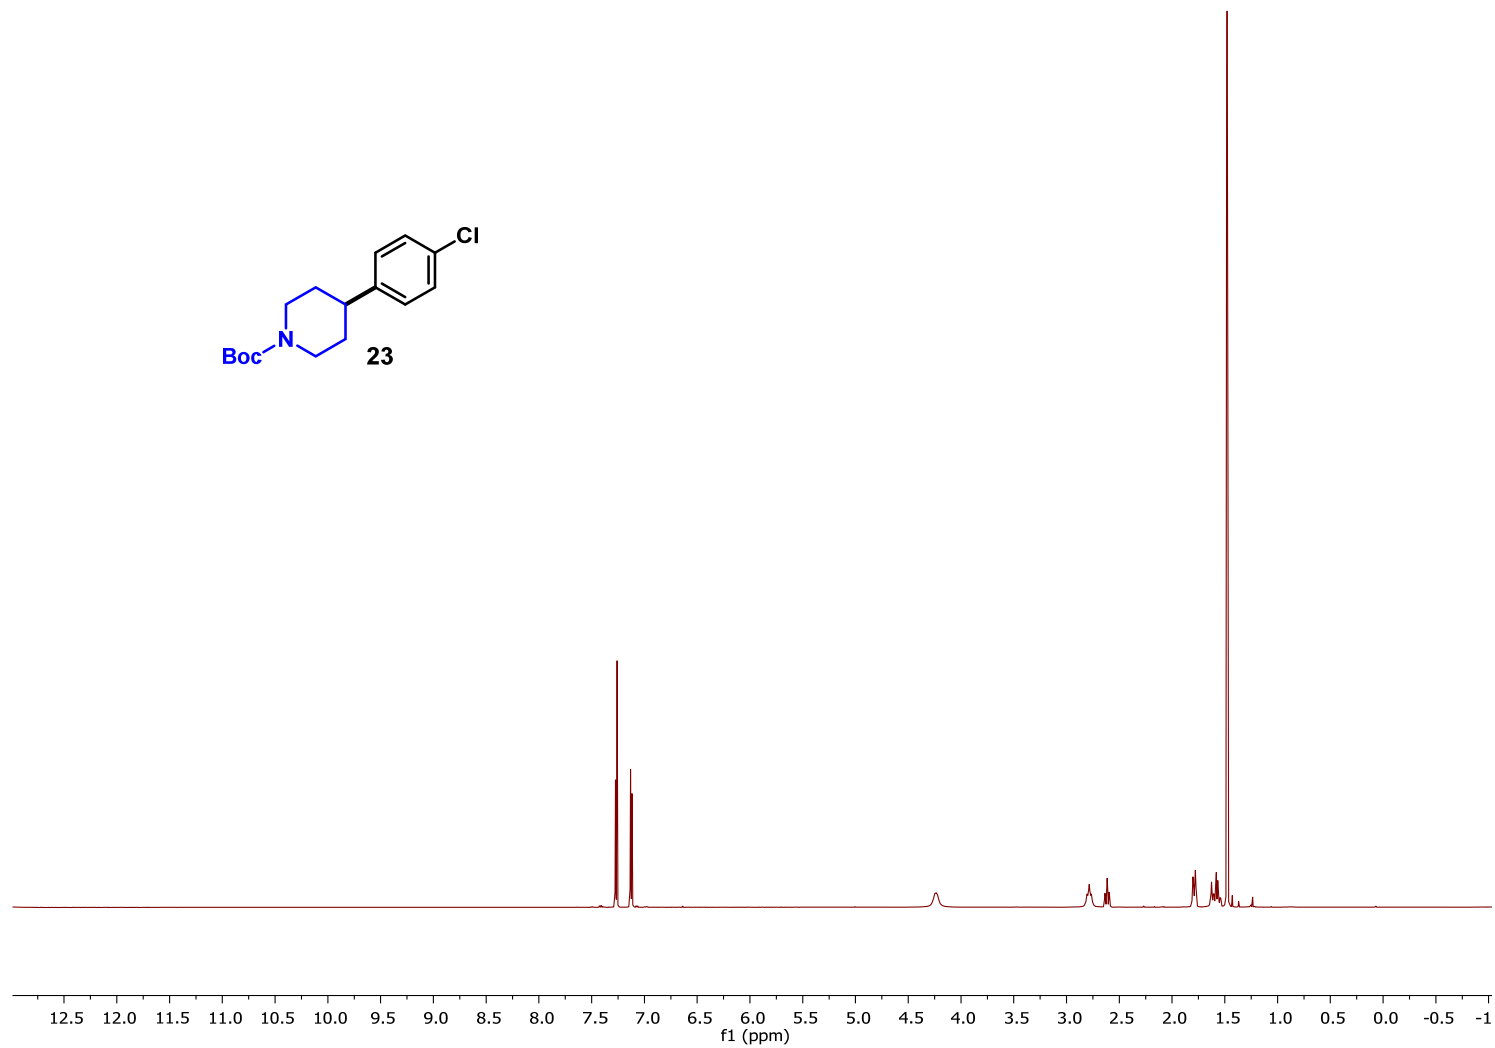

# Compound 23 $^{13}\text{C}$ NMR

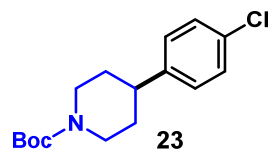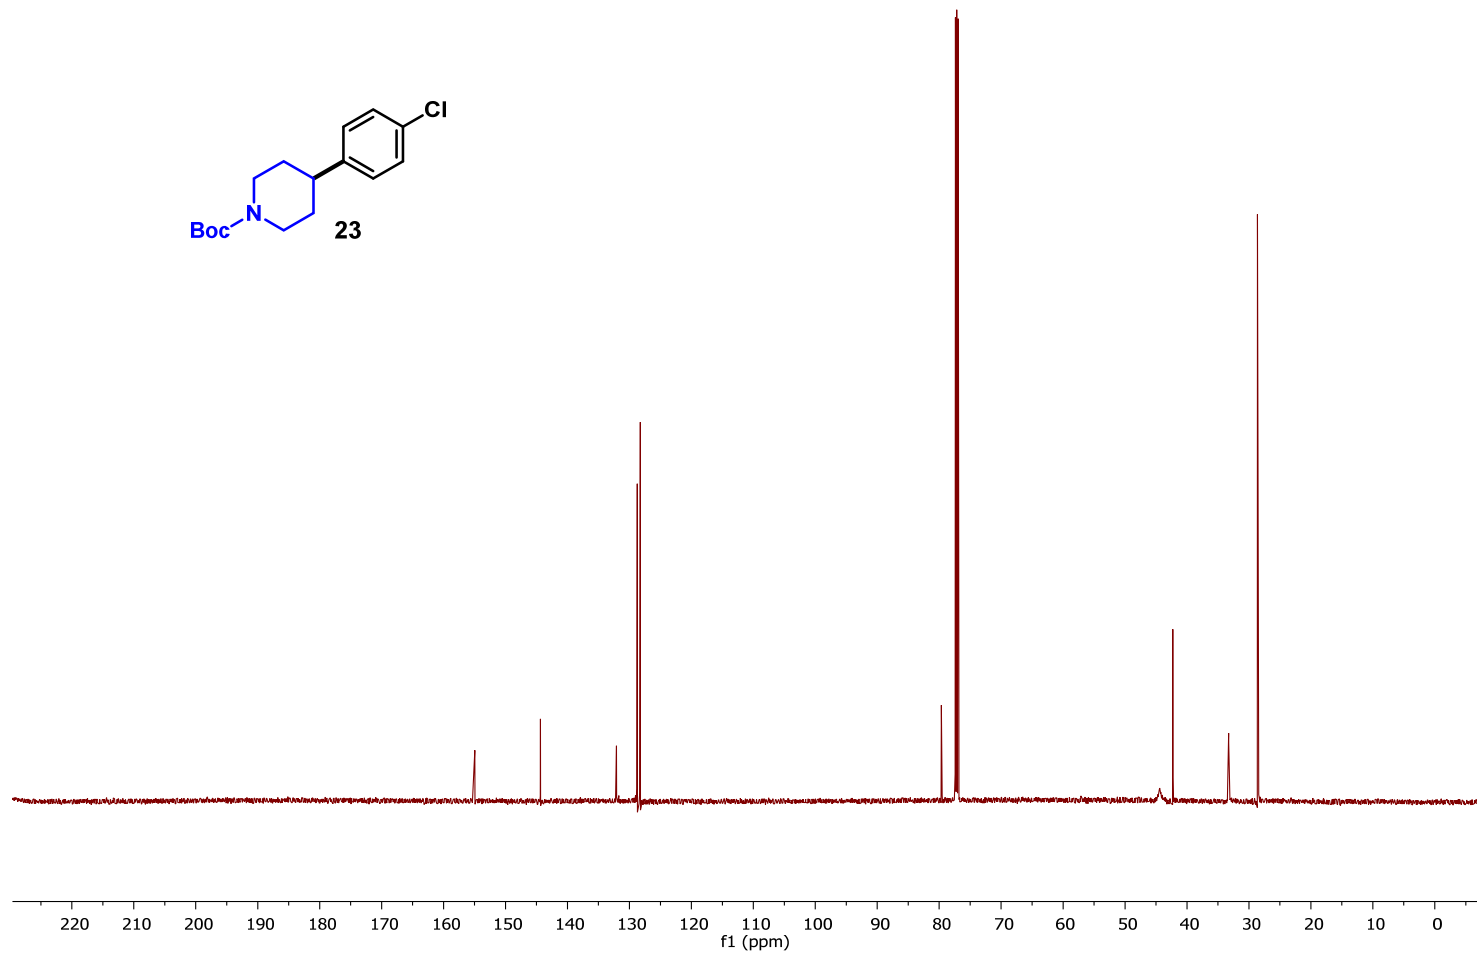

# Compound 24 <sup>1</sup>H NMR

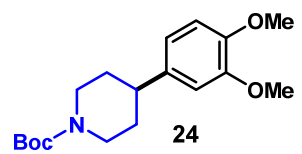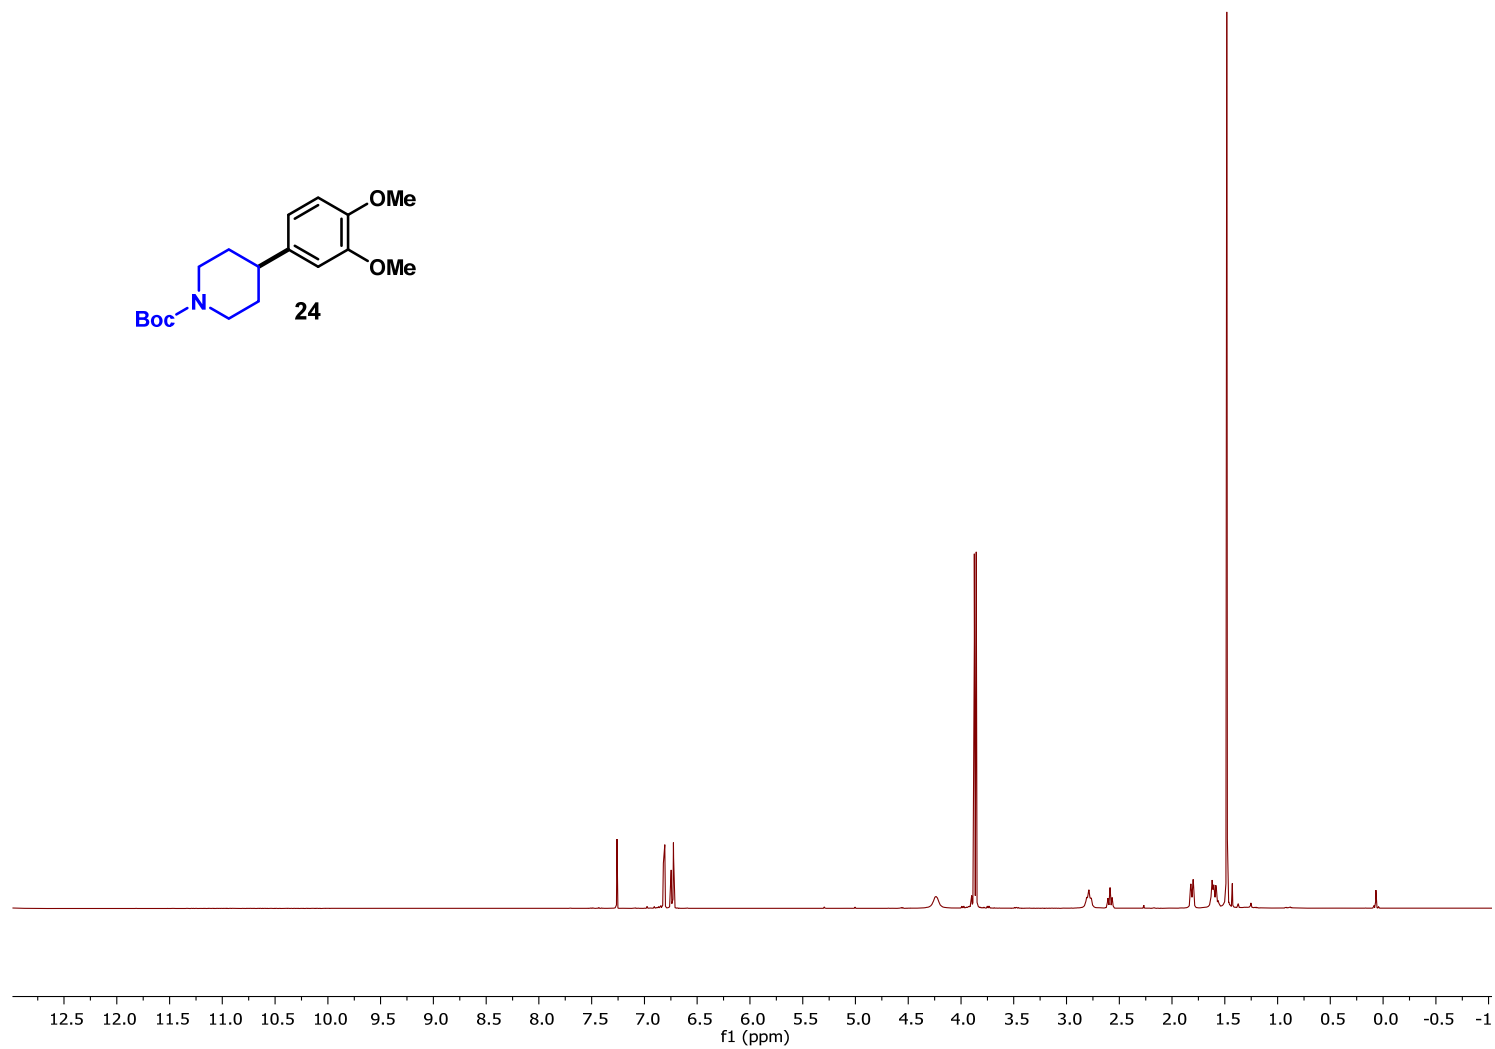



# Compound 24 $^{13}\text{C}$ NMR

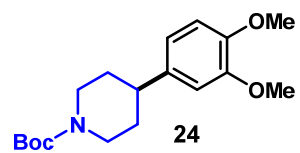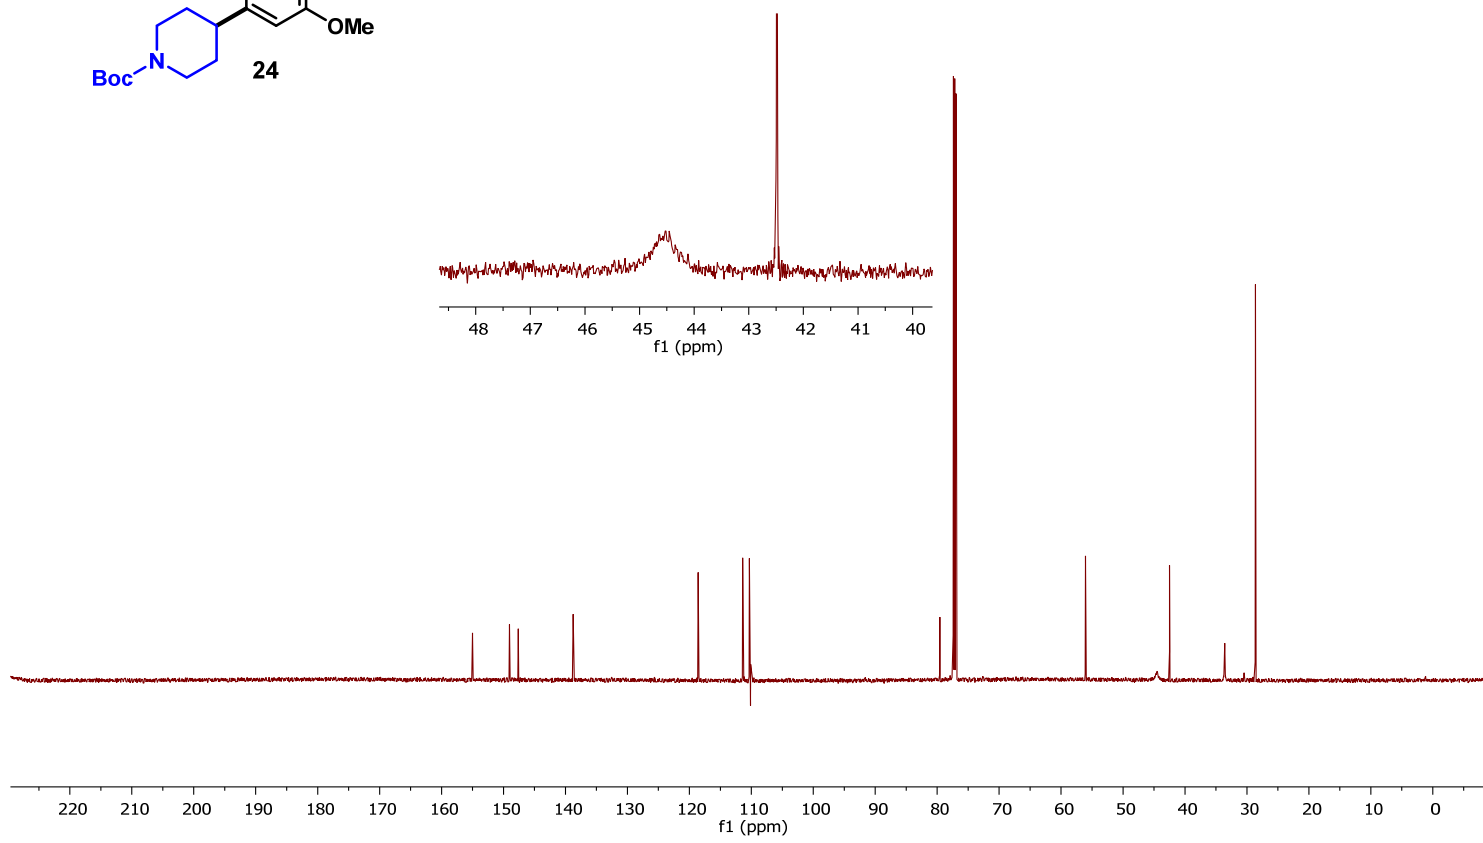

# Compound 25 <sup>1</sup>H NMR

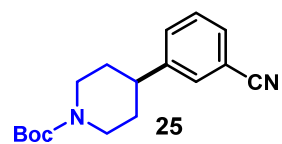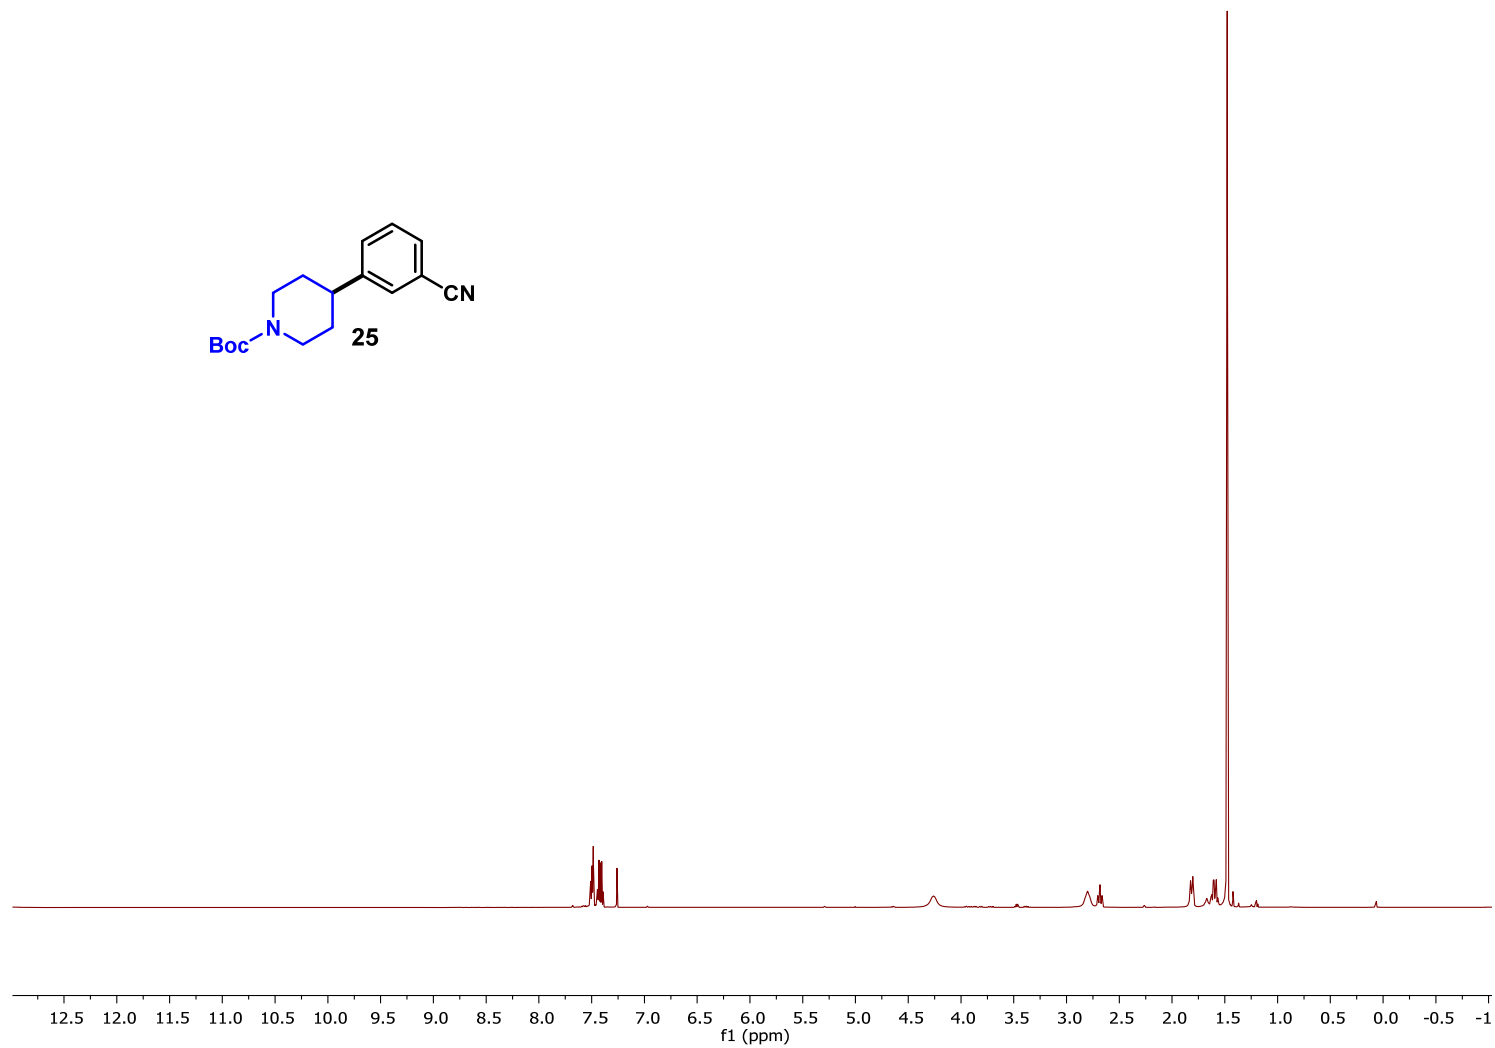

# Compound 25 <sup>13</sup>C NMR

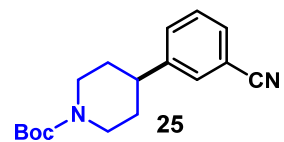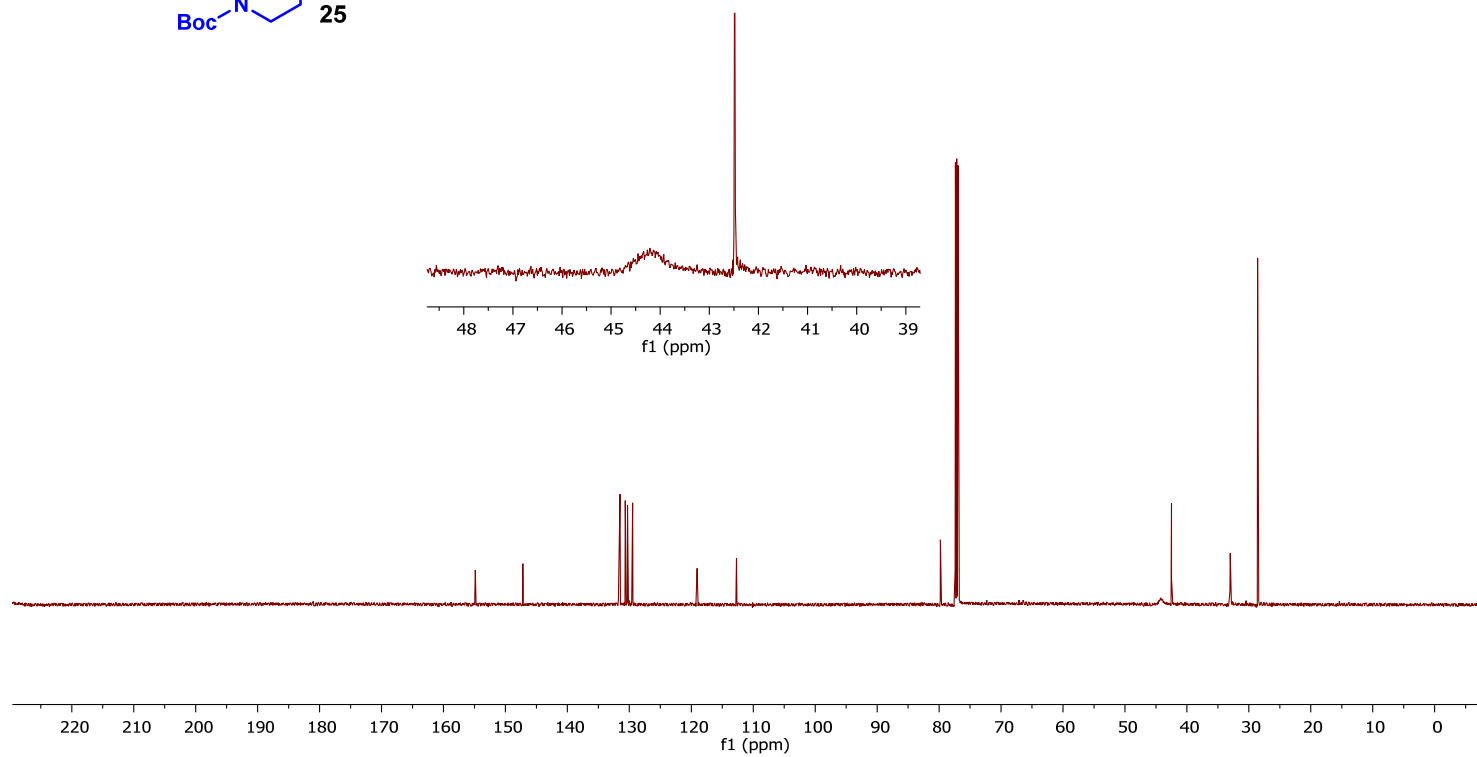

# Compound 26 <sup>1</sup>H NMR

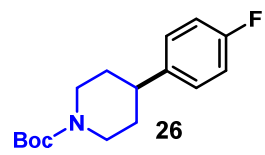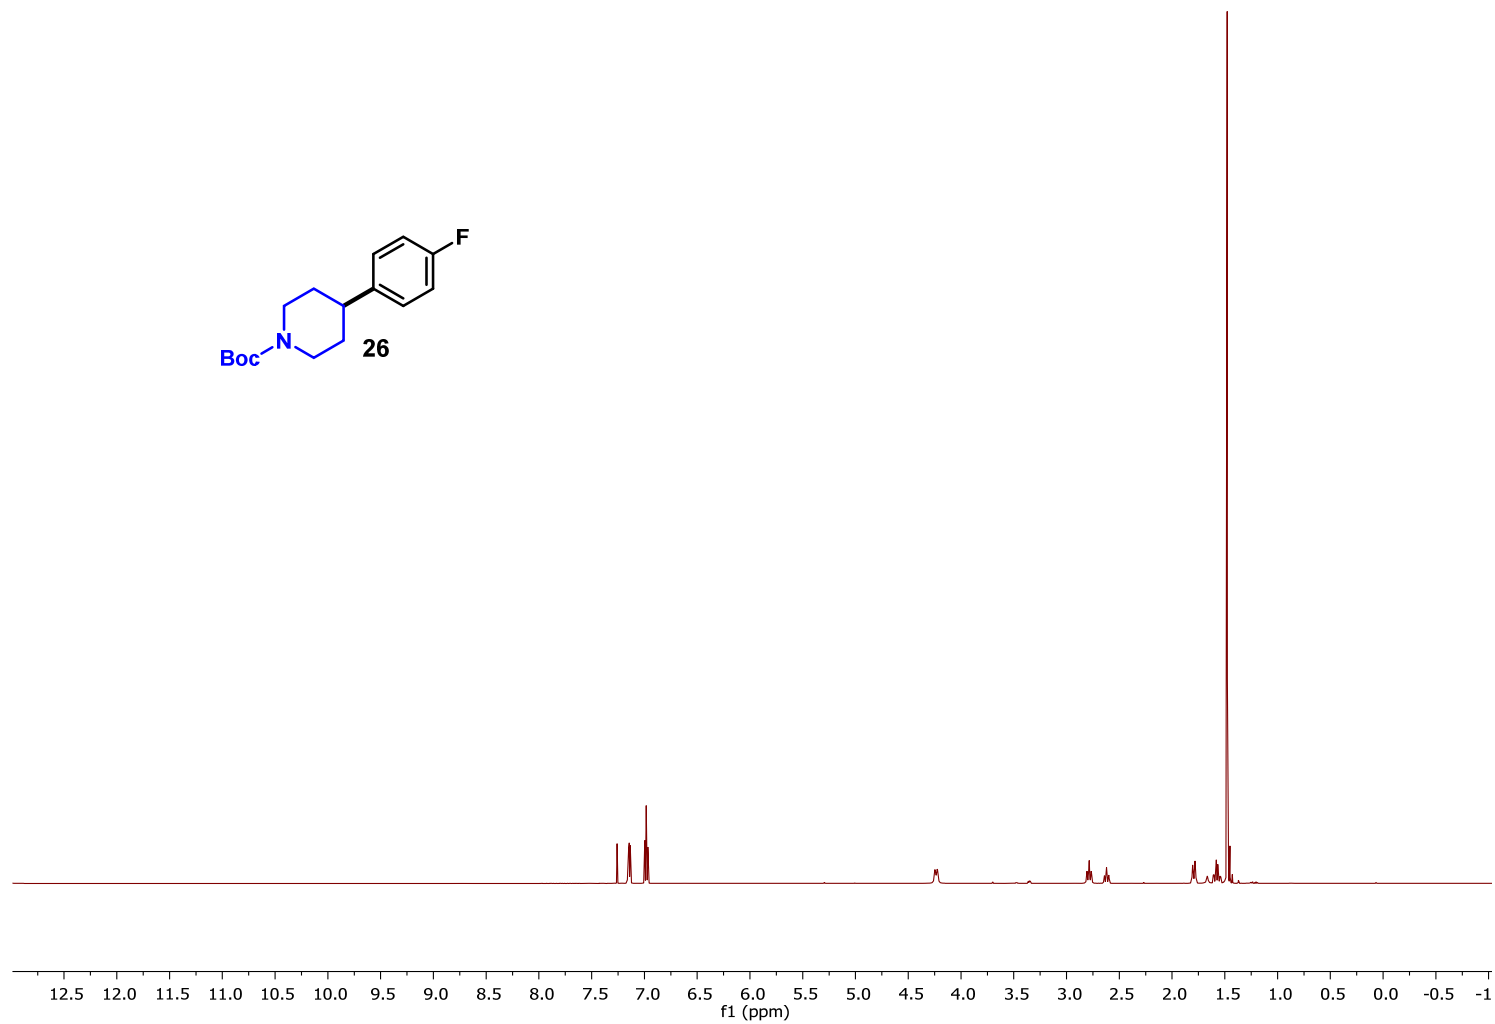

# Compound 26 $^{13}\text{C}$ NMR

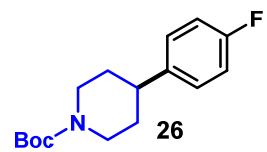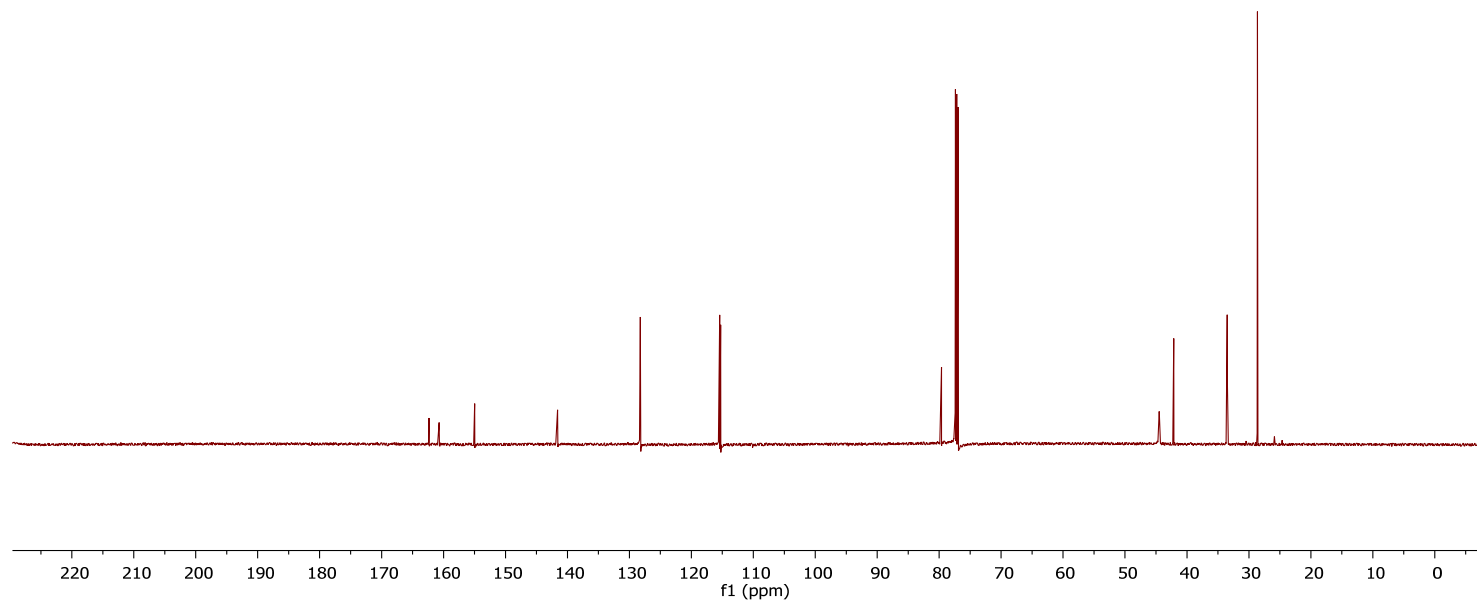

# Compound 26 $^{19}\text{F}$ NMR

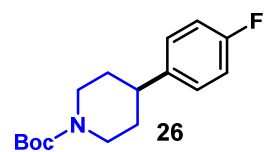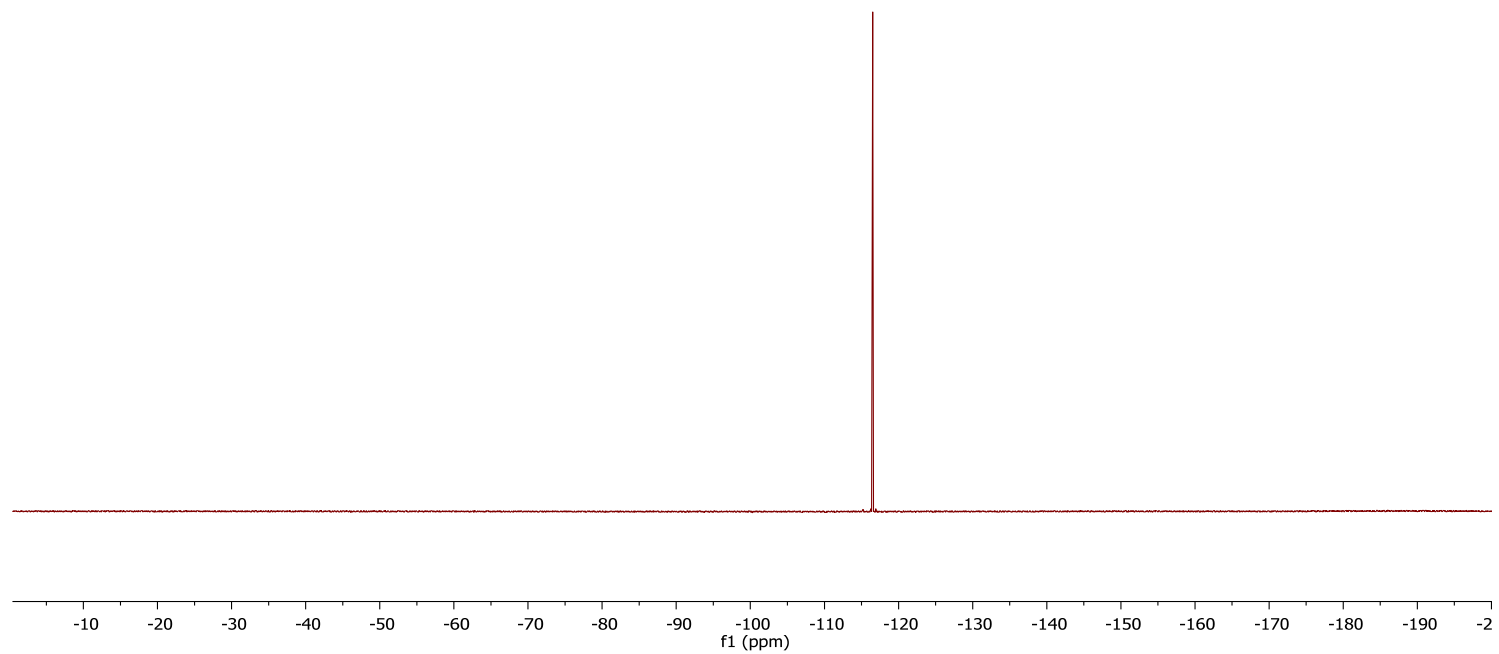

# Compound 27 <sup>1</sup>H NMR

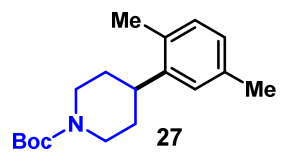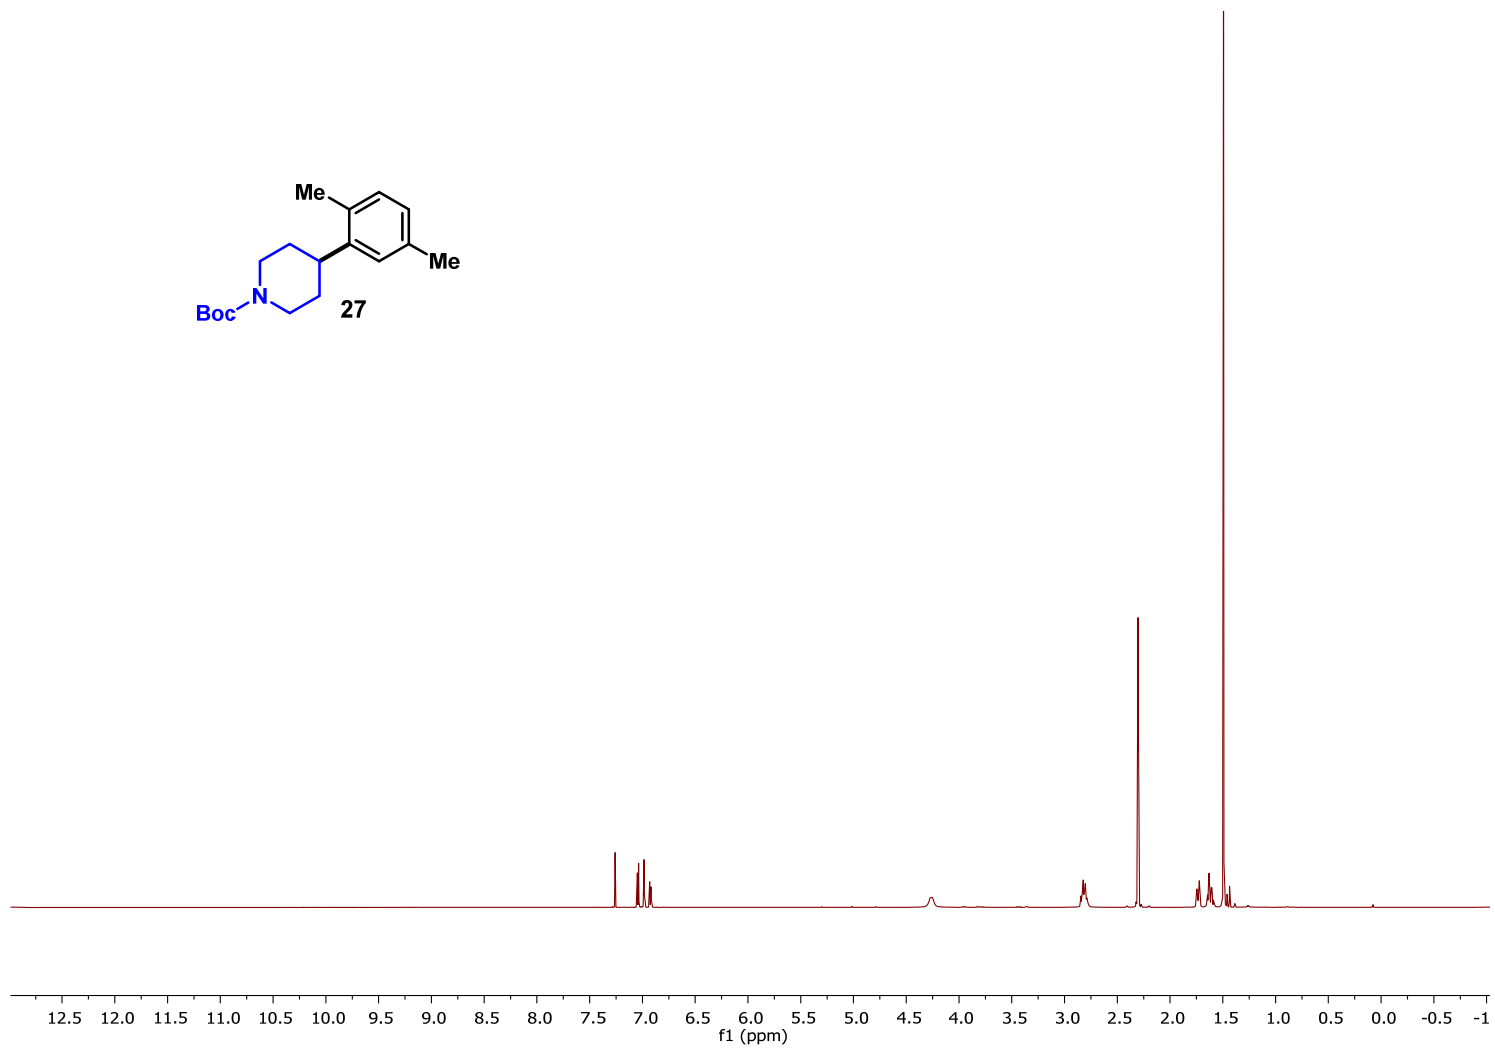

# Compound 27 $^{13}\text{C}$ NMR

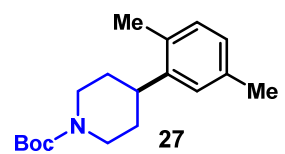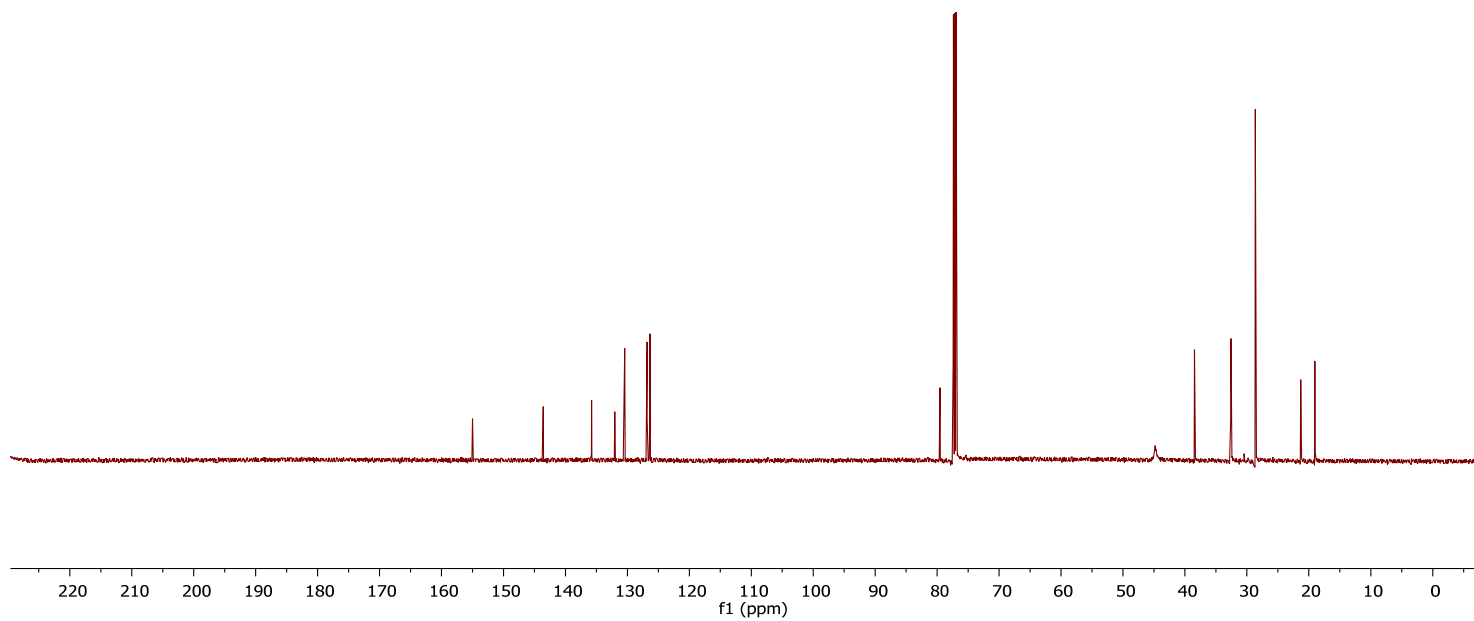



# Compound 28 <sup>1</sup>H NMR

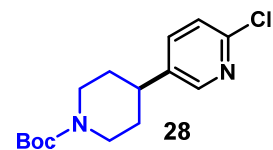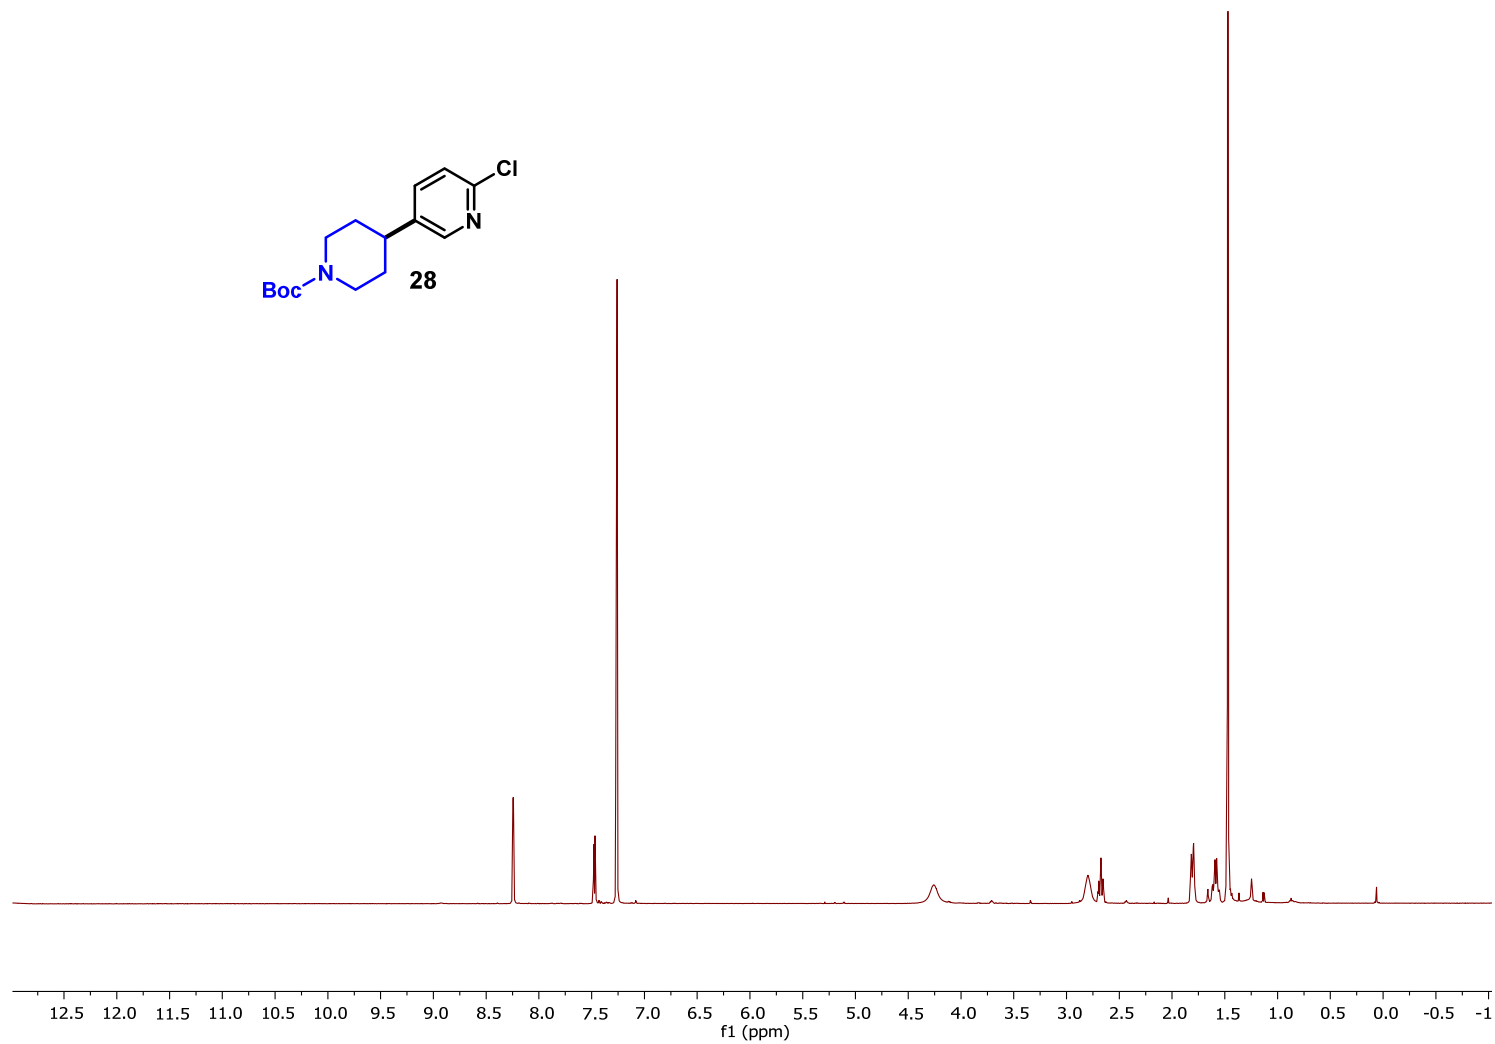

# Compound 28 $^{13}\text{C}$ NMR

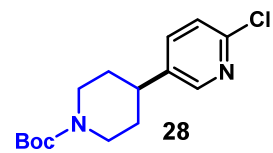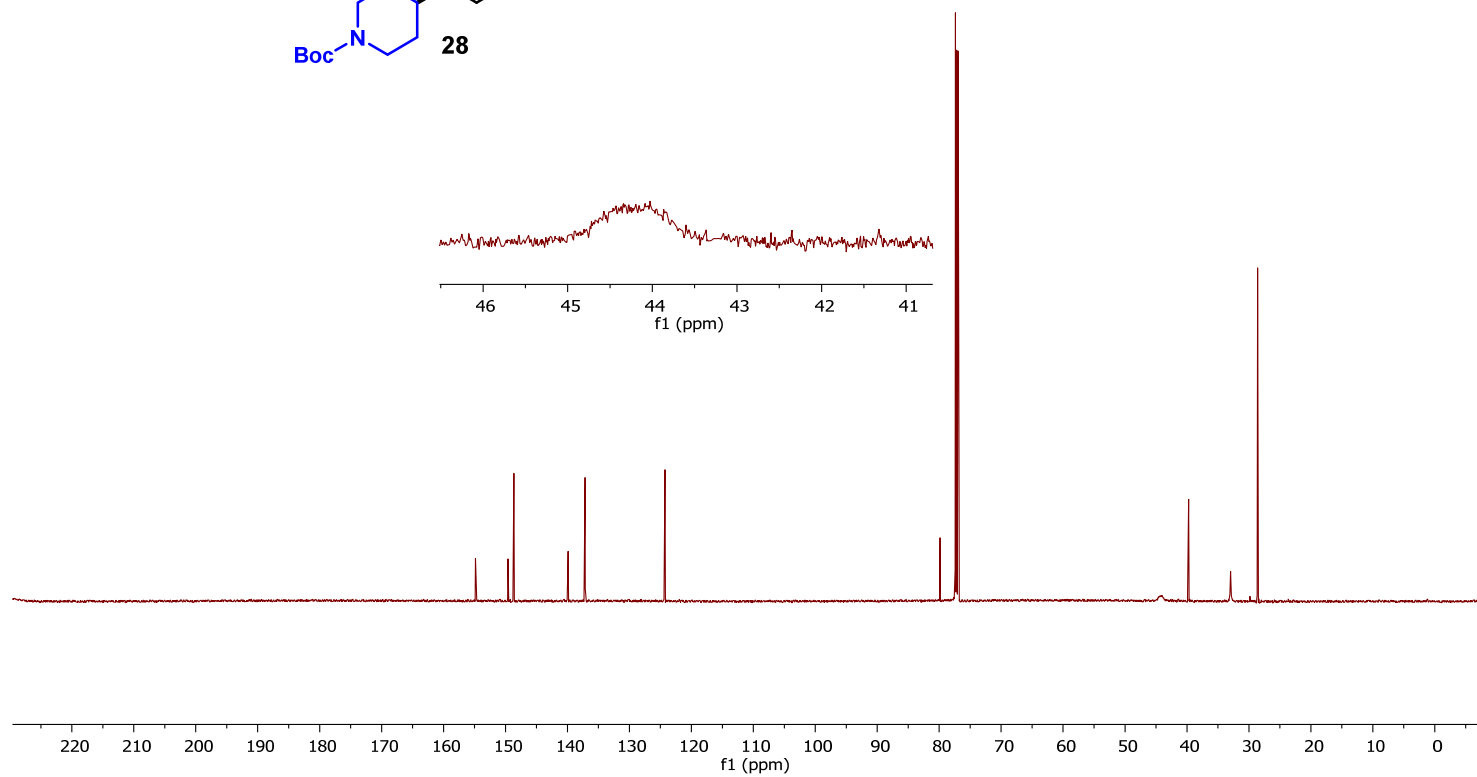

# Compound 28 HSQC

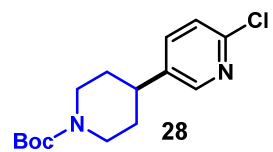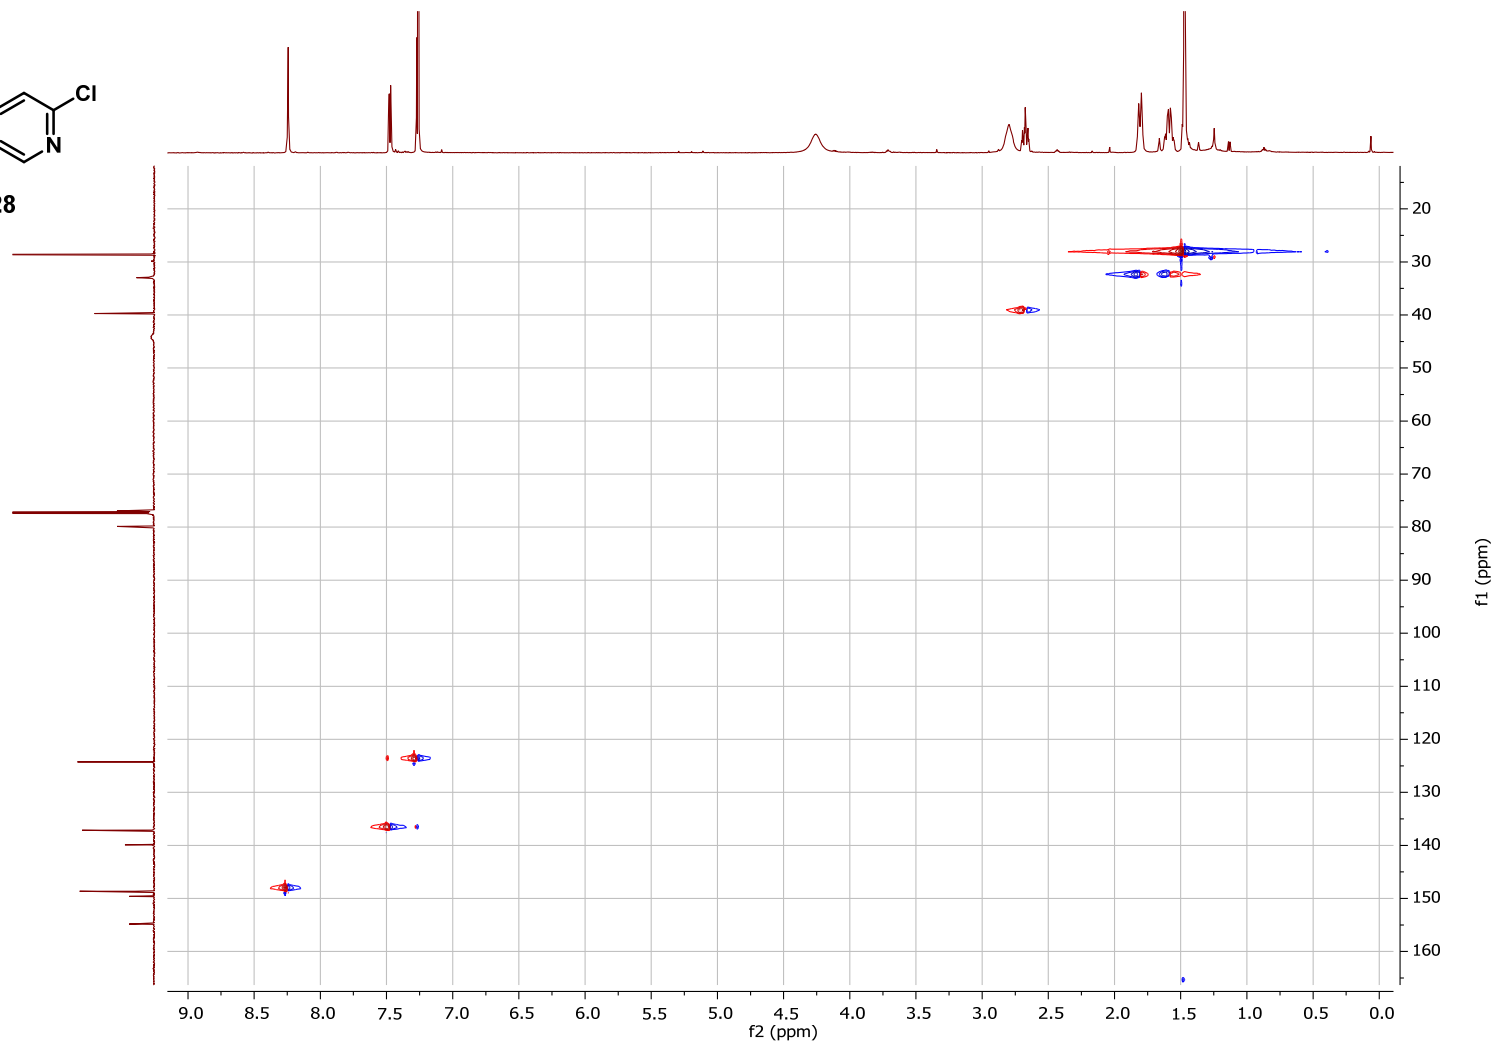

# Compound 28 HMBC

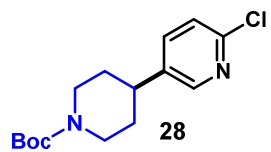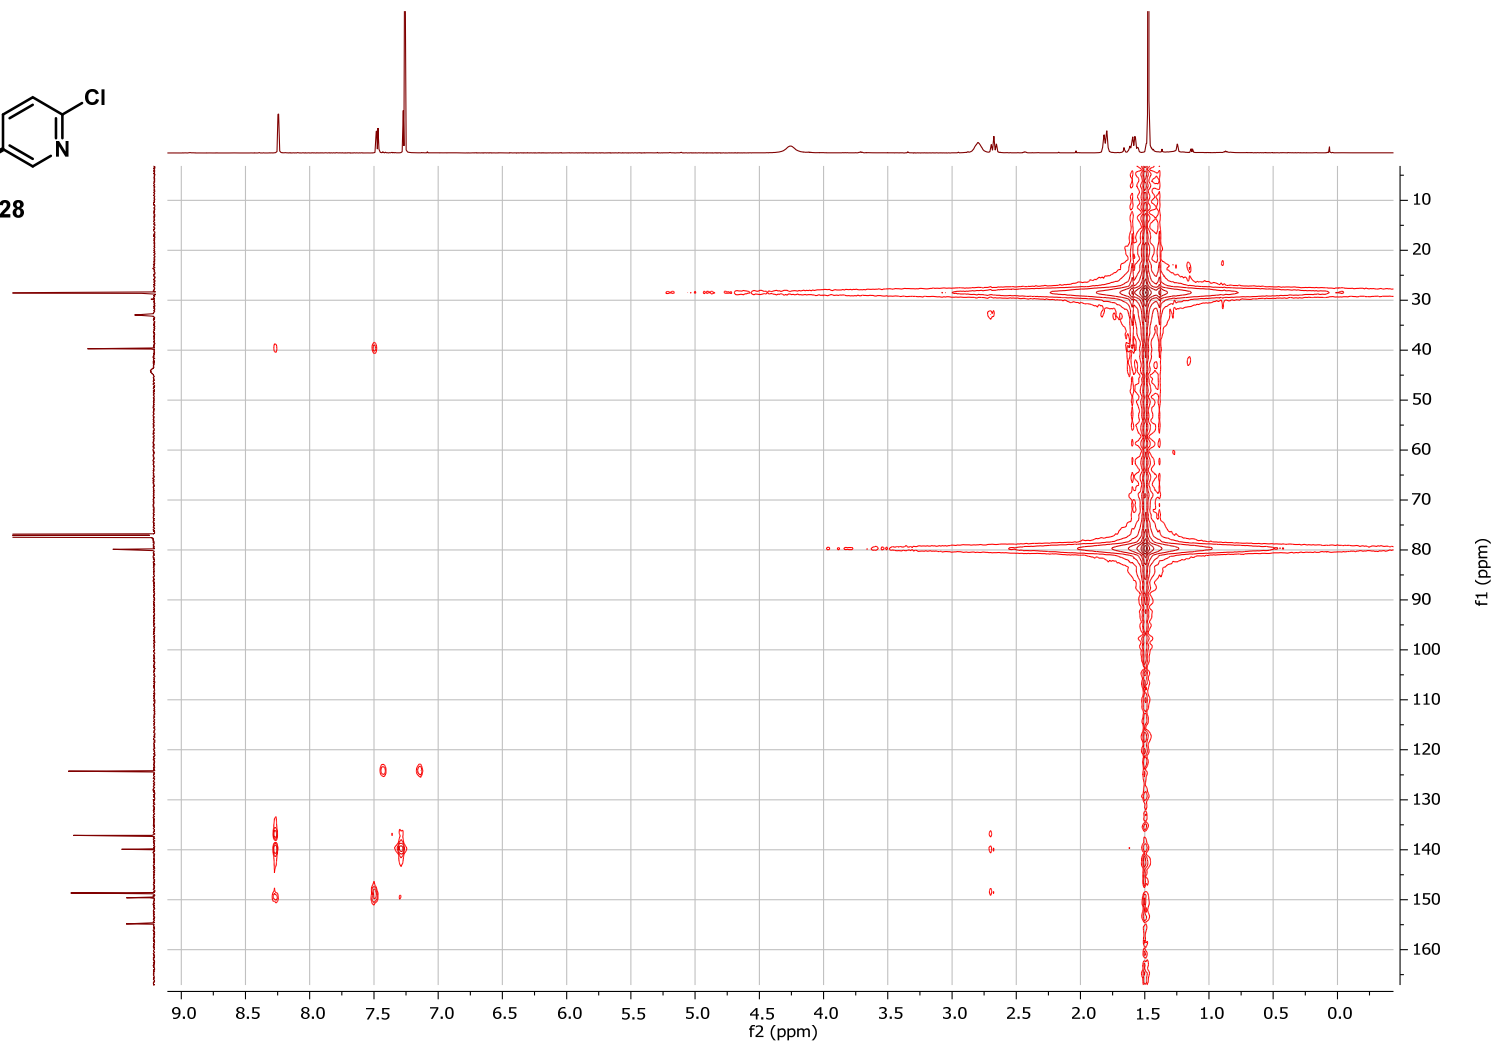

# Compound 29 <sup>1</sup>H NMR

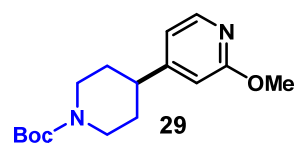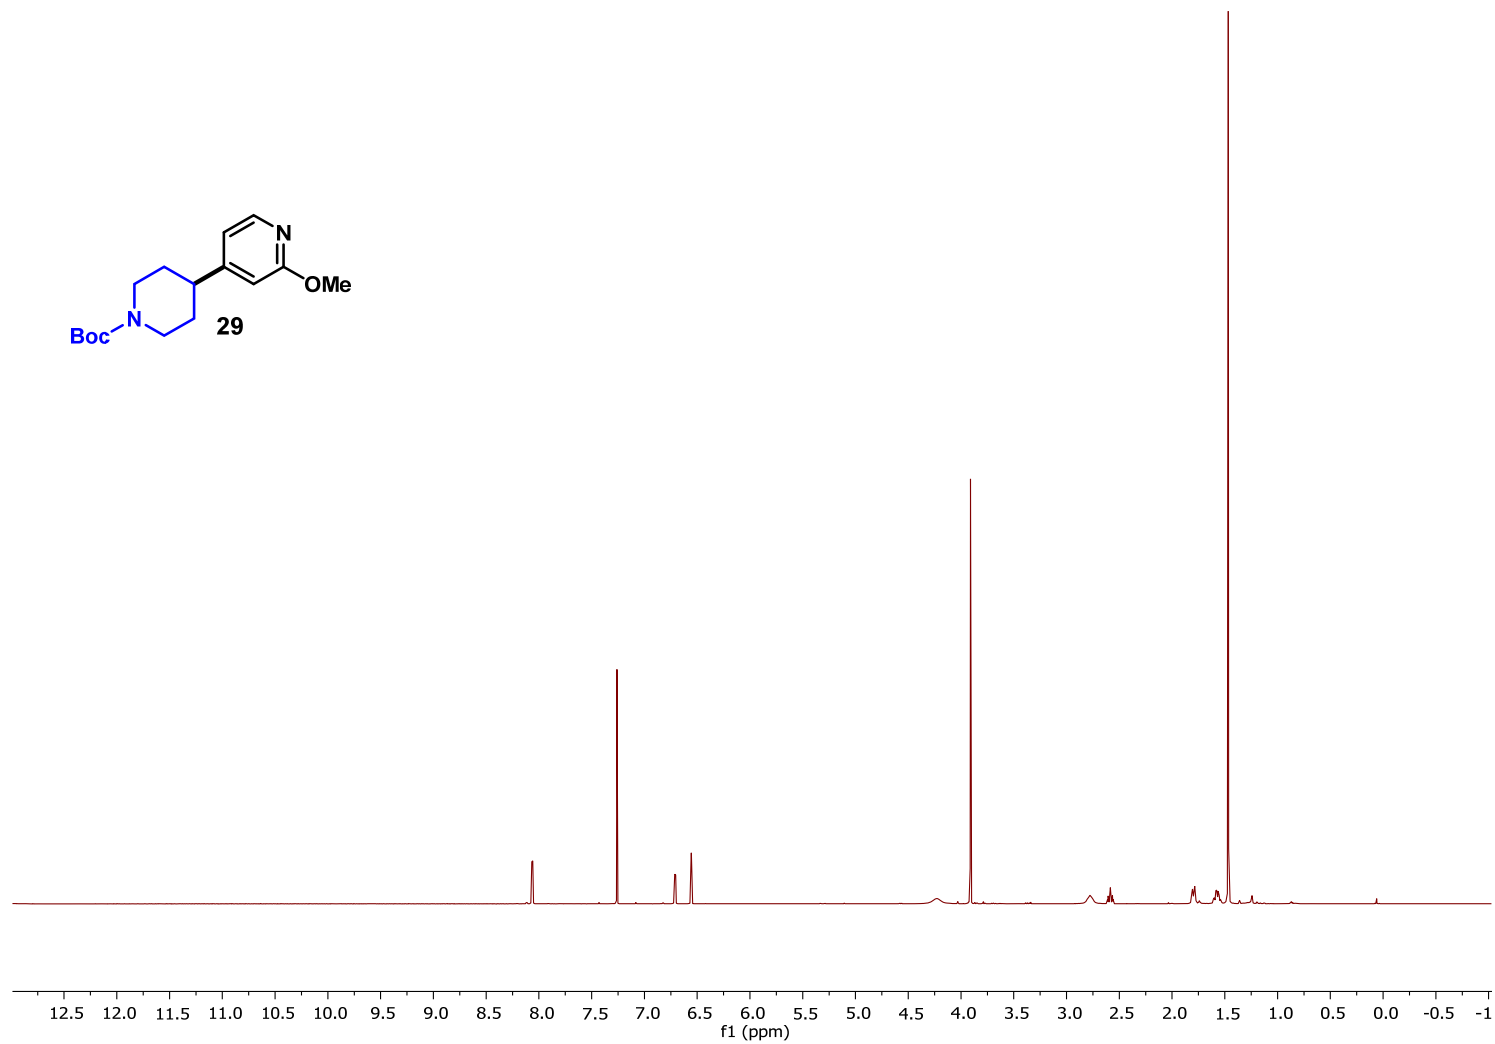

# Compound 29 $^{13}\text{C}$ NMR

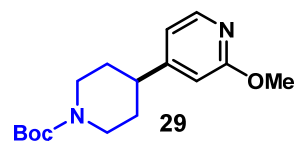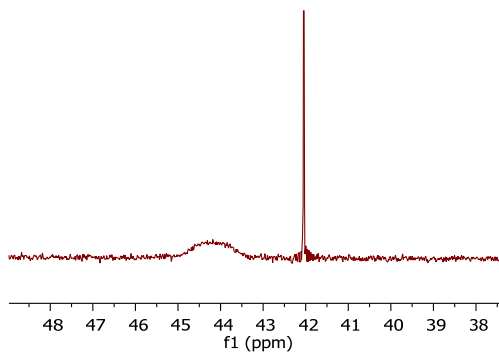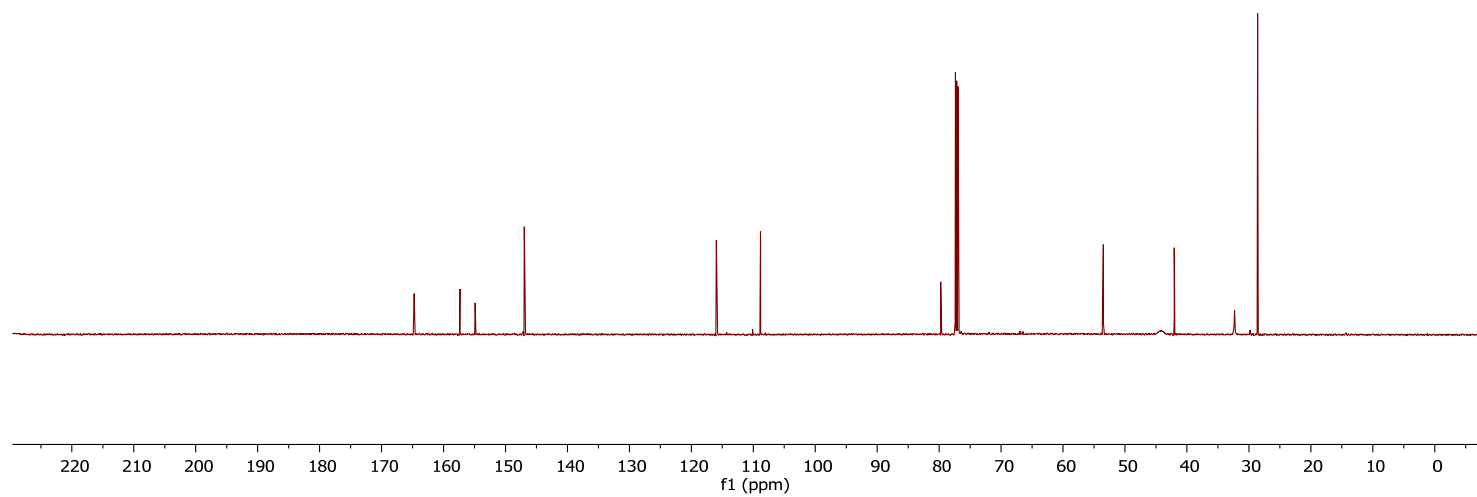



# Compound 30 <sup>13</sup>C NMR

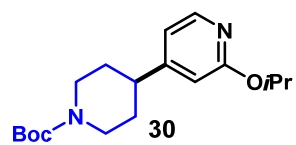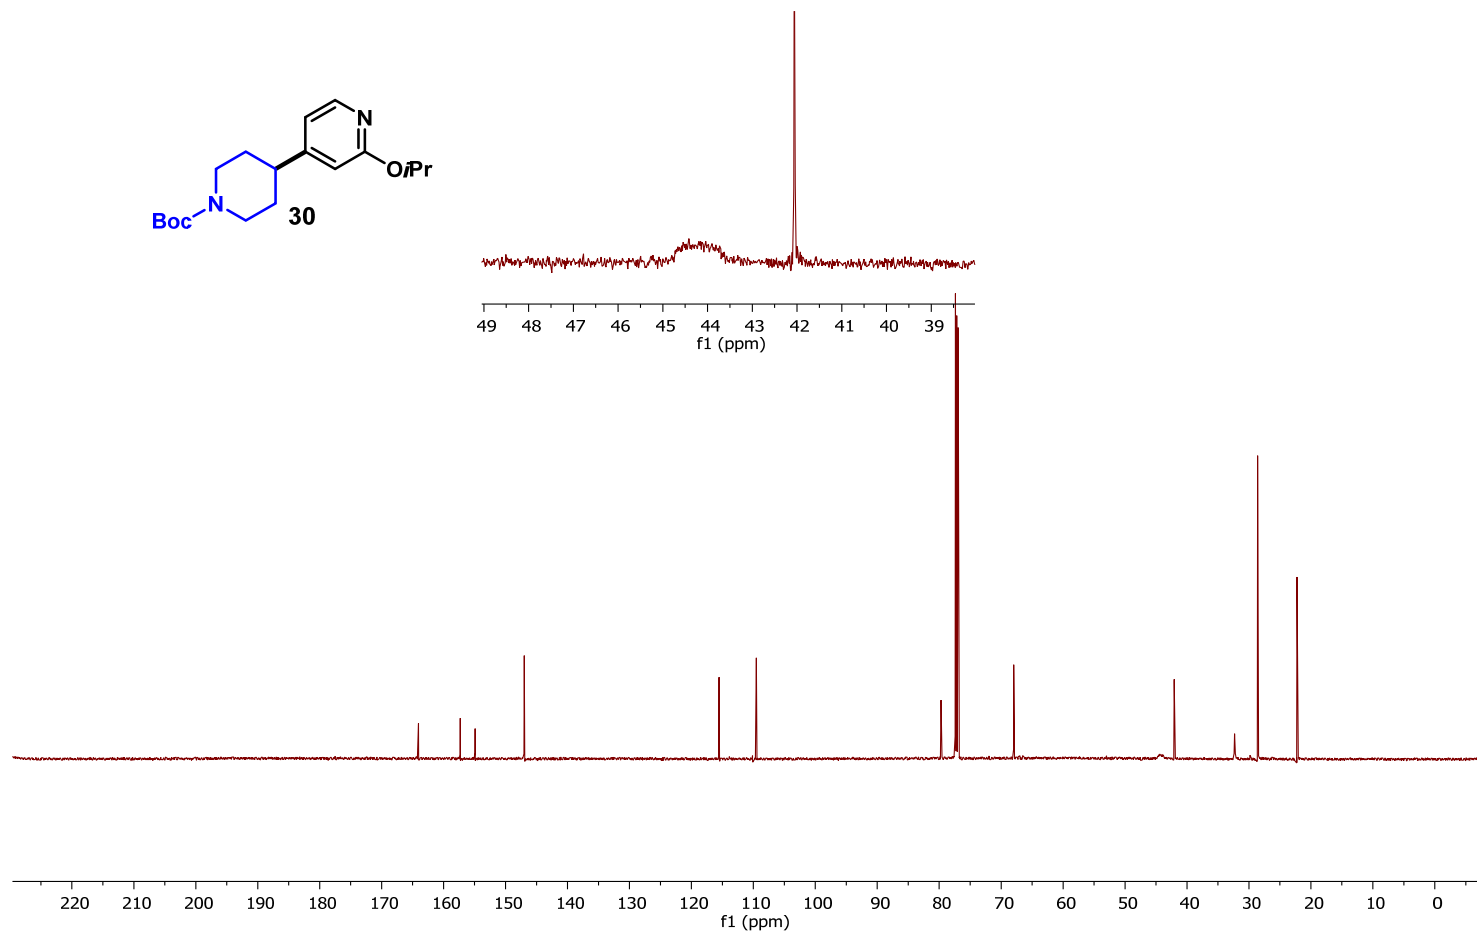



# Compound 31 <sup>1</sup>H NMR

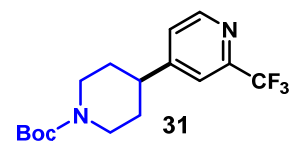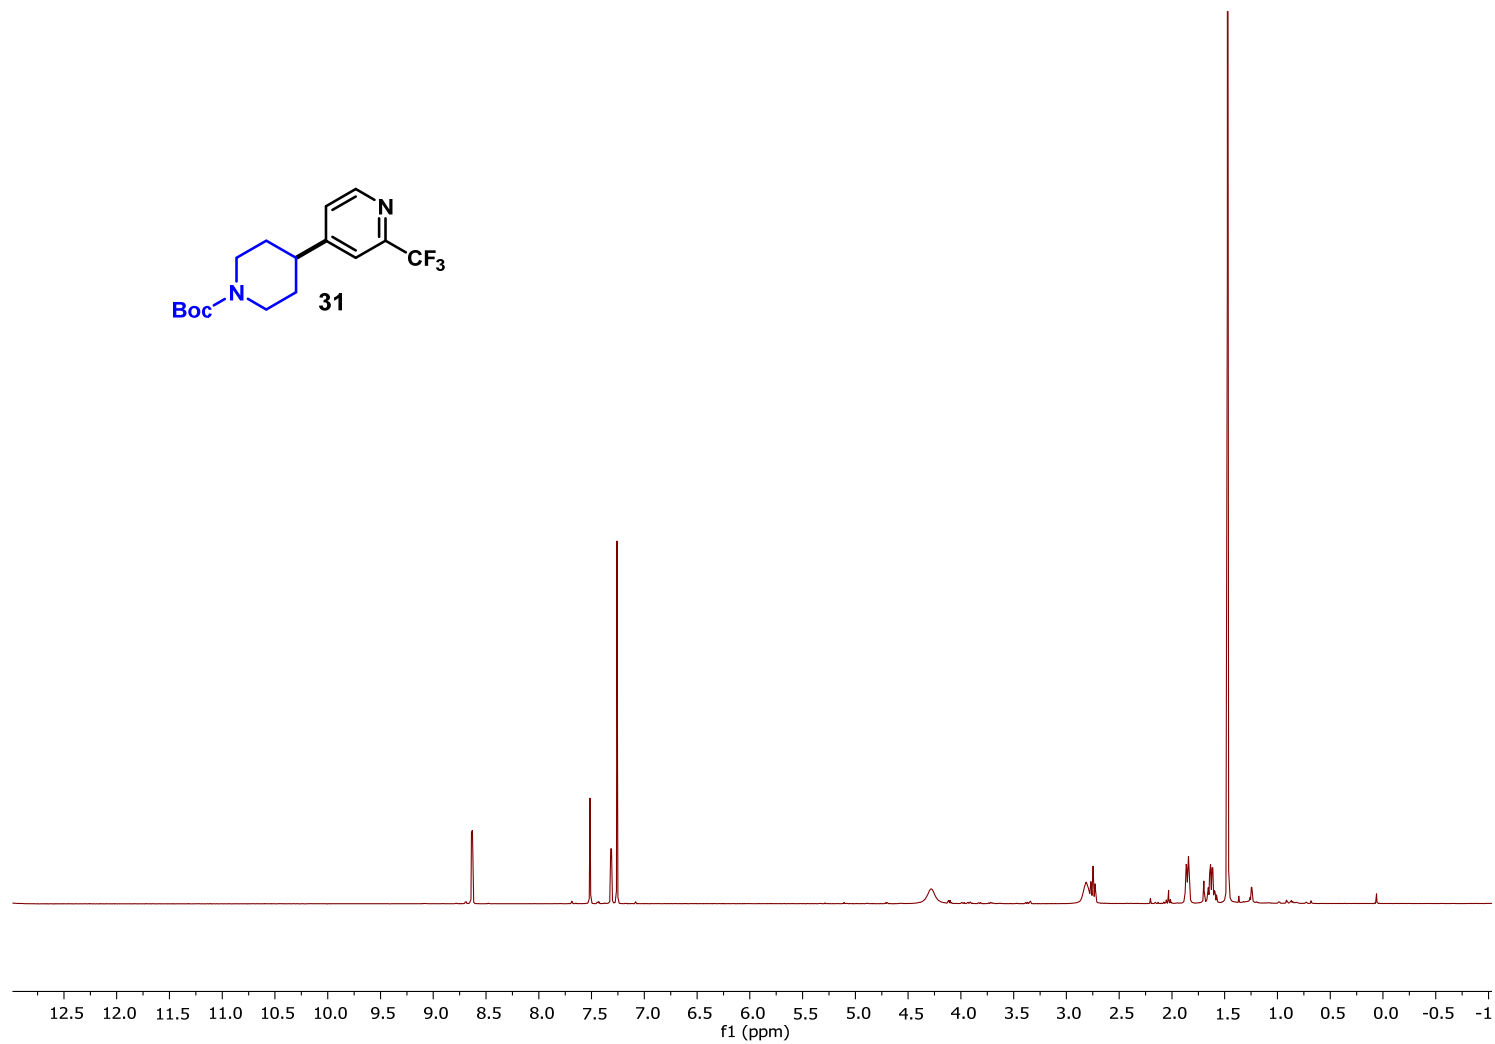

# Compound 31 <sup>13</sup>C NMR

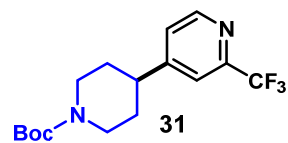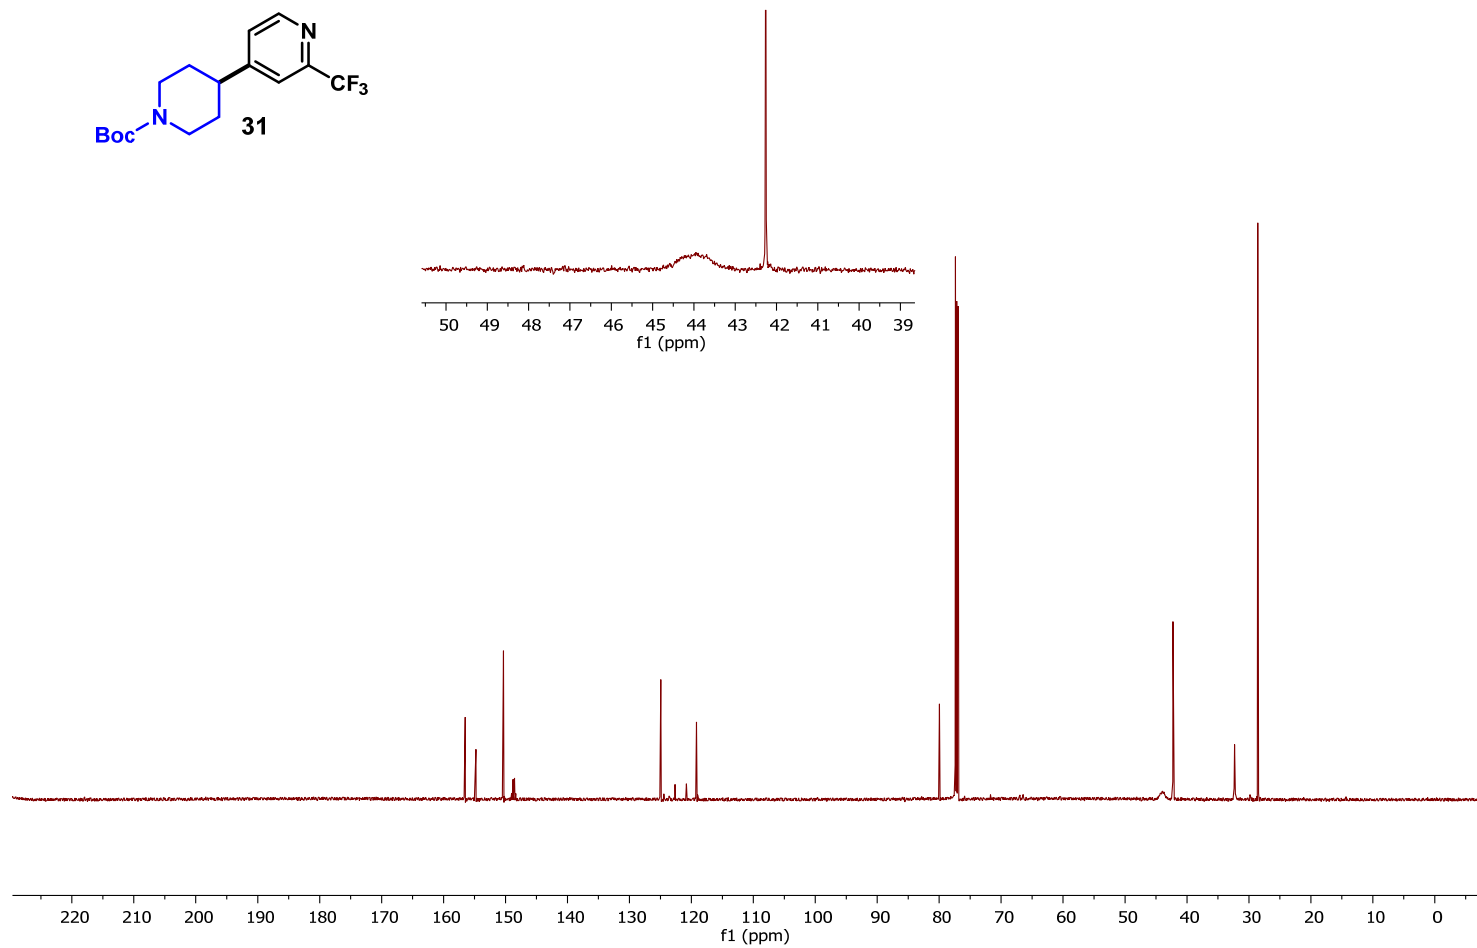

# Compound 31 $^{19}\text{F}$ NMR

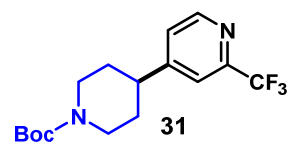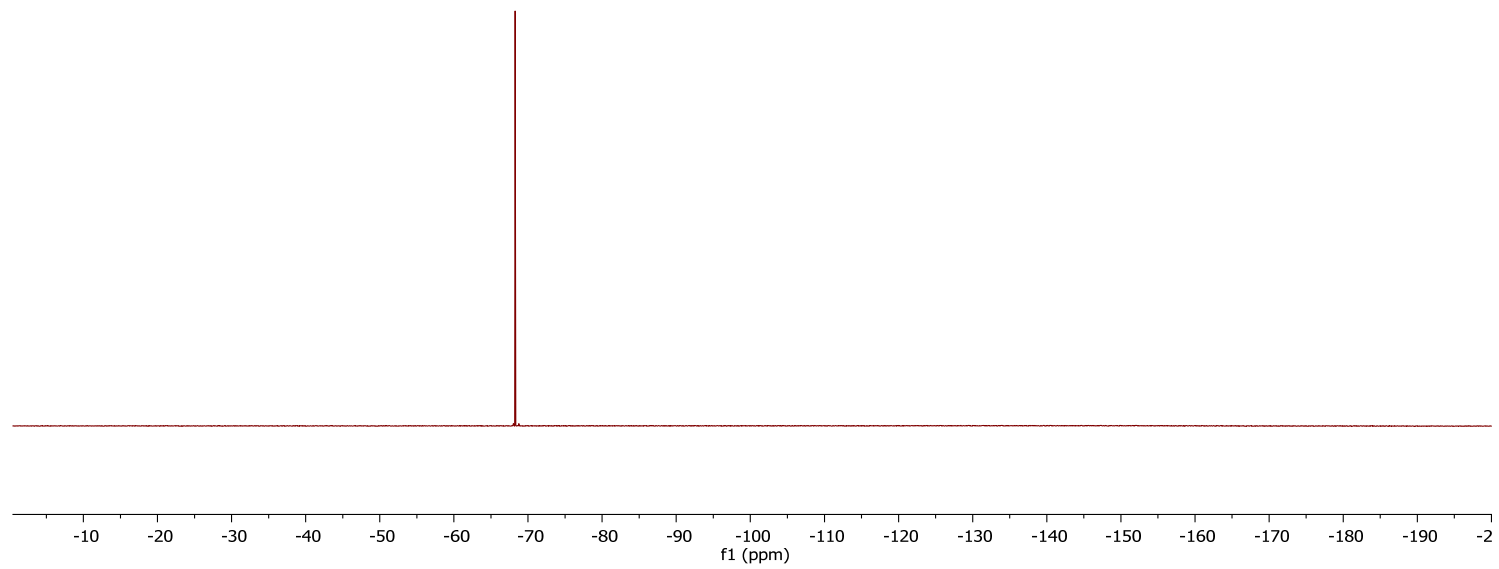

# Compound 32 <sup>1</sup>H NMR

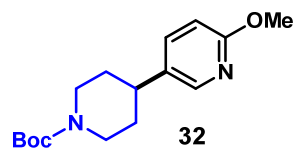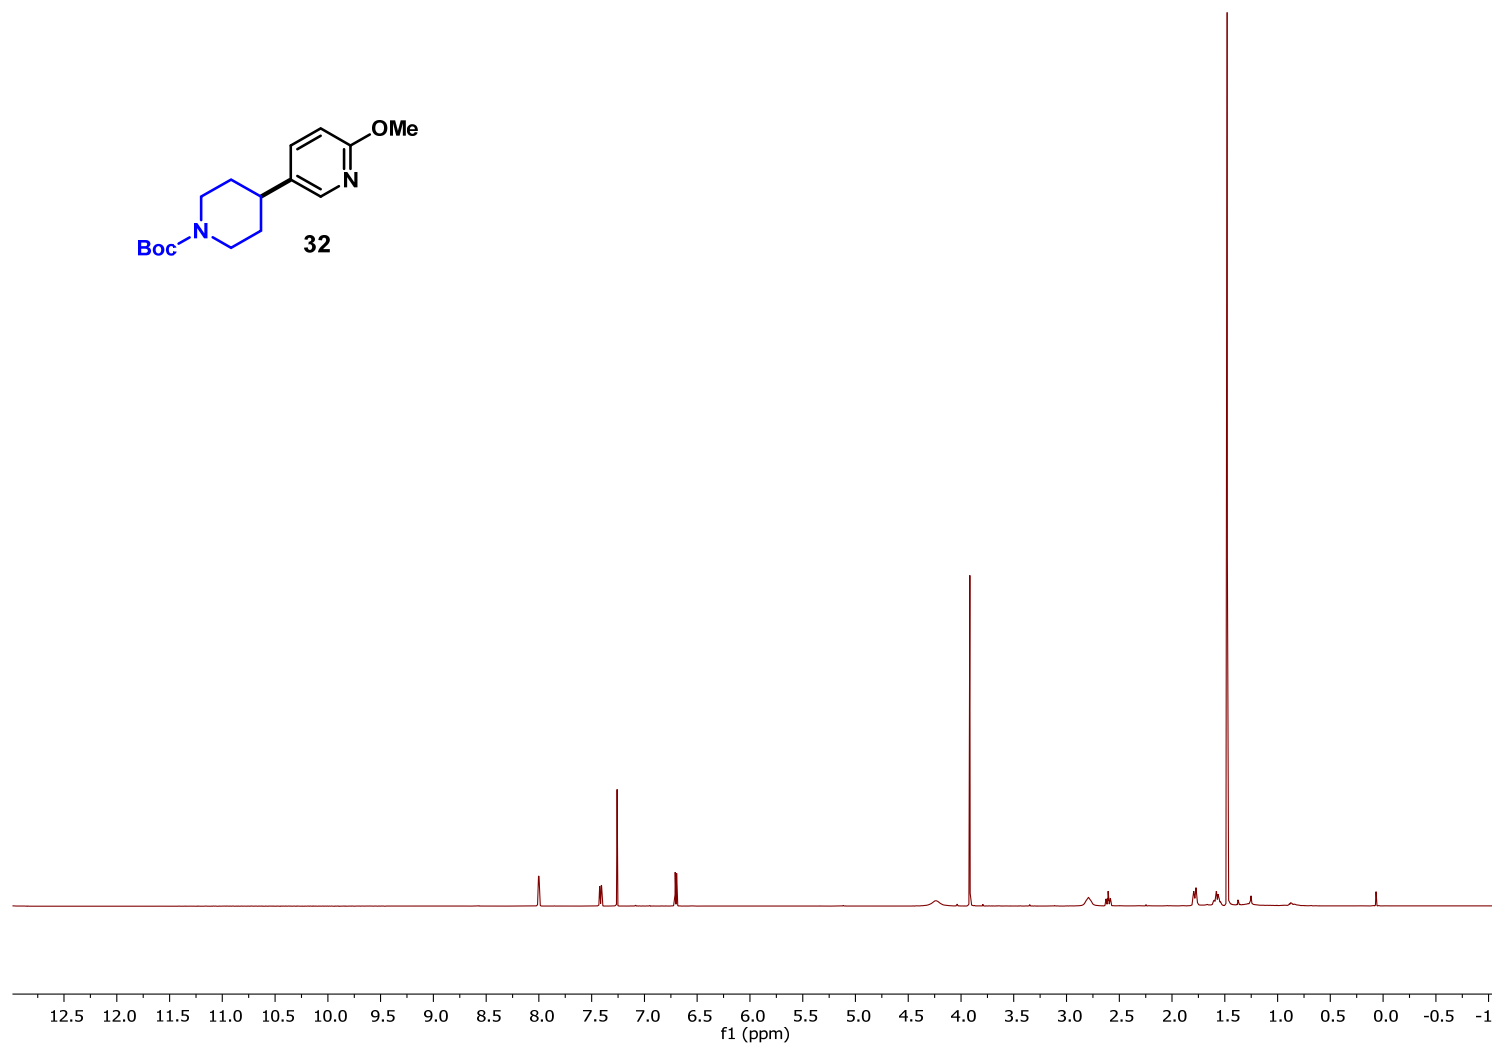

# Compound 32 <sup>13</sup>C NMR

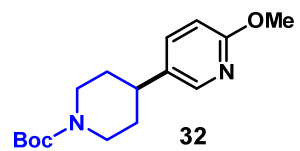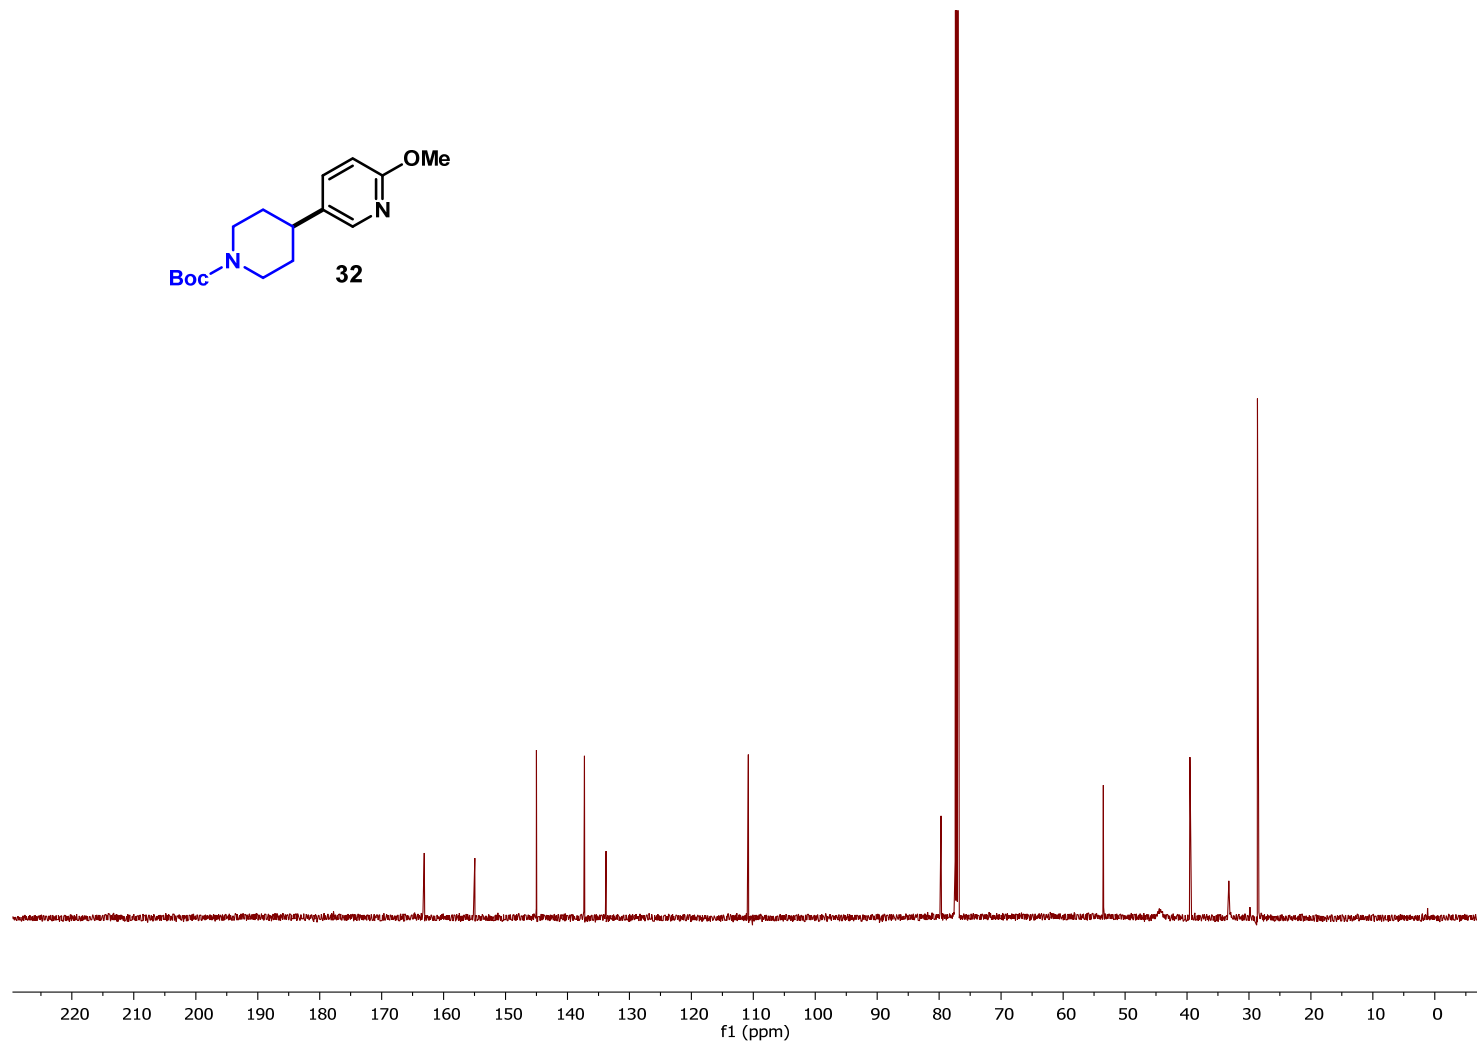

# Compound 33 $^1\text{H}$ NMR

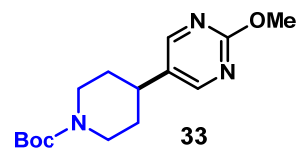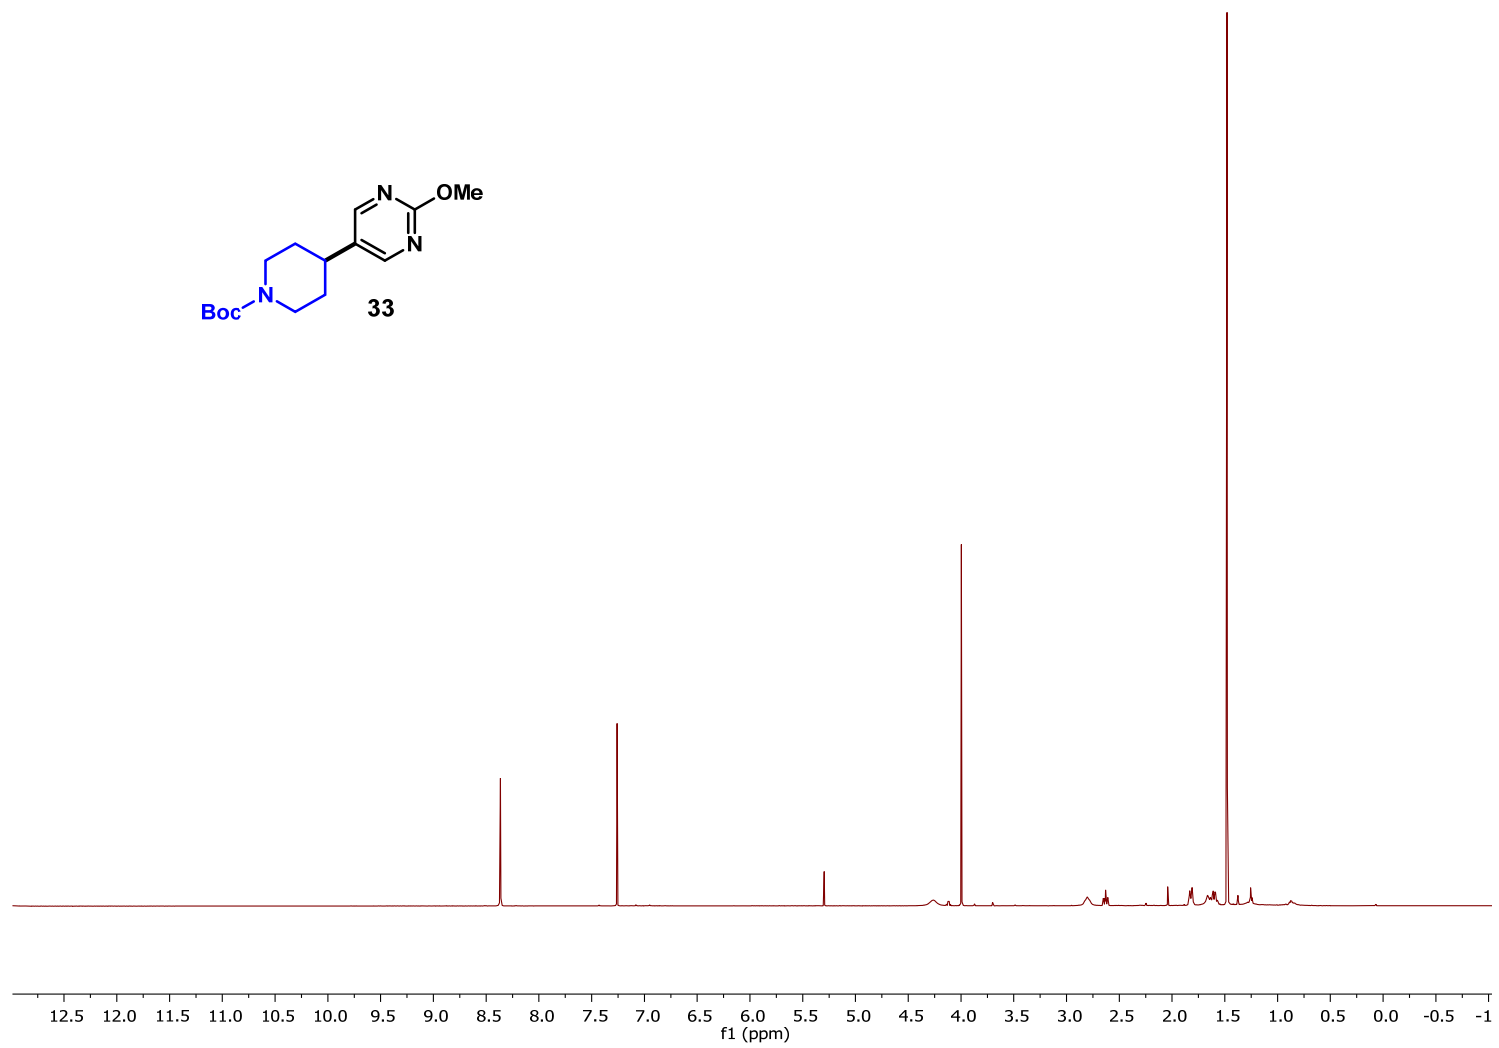

Compound 33  $^{13}\text{C}$  NMR

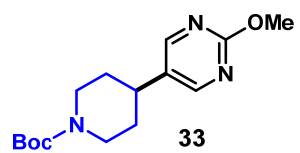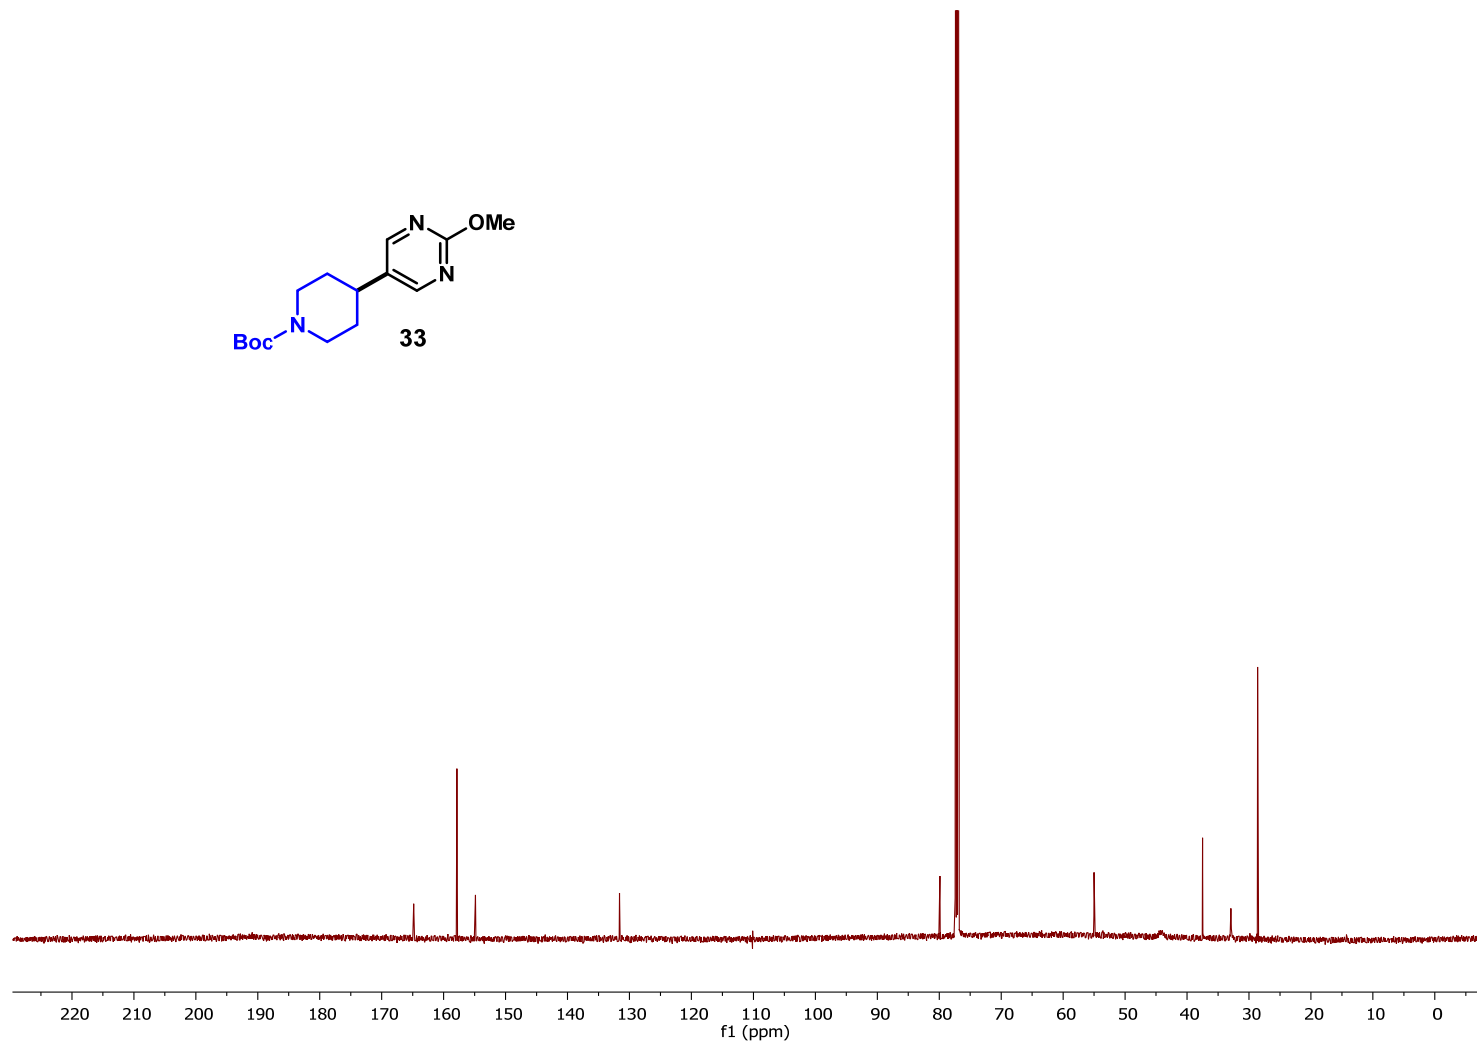

# Compound 34 <sup>1</sup>H NMR

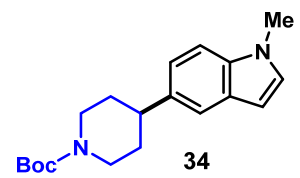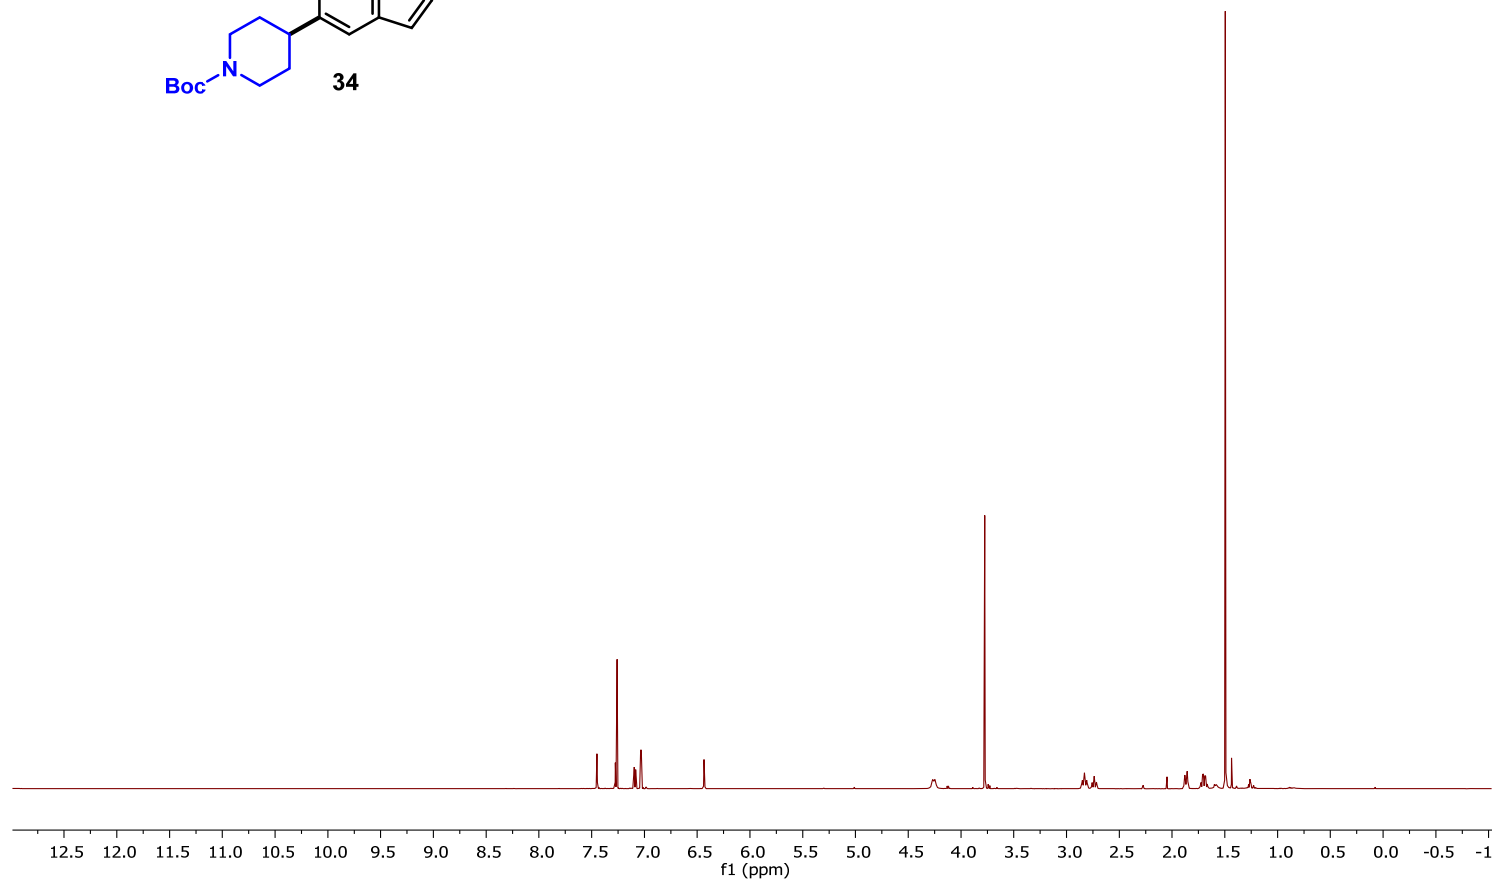



# Compound 34 $^{13}\text{C}$ NMR

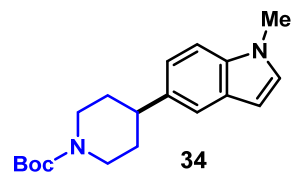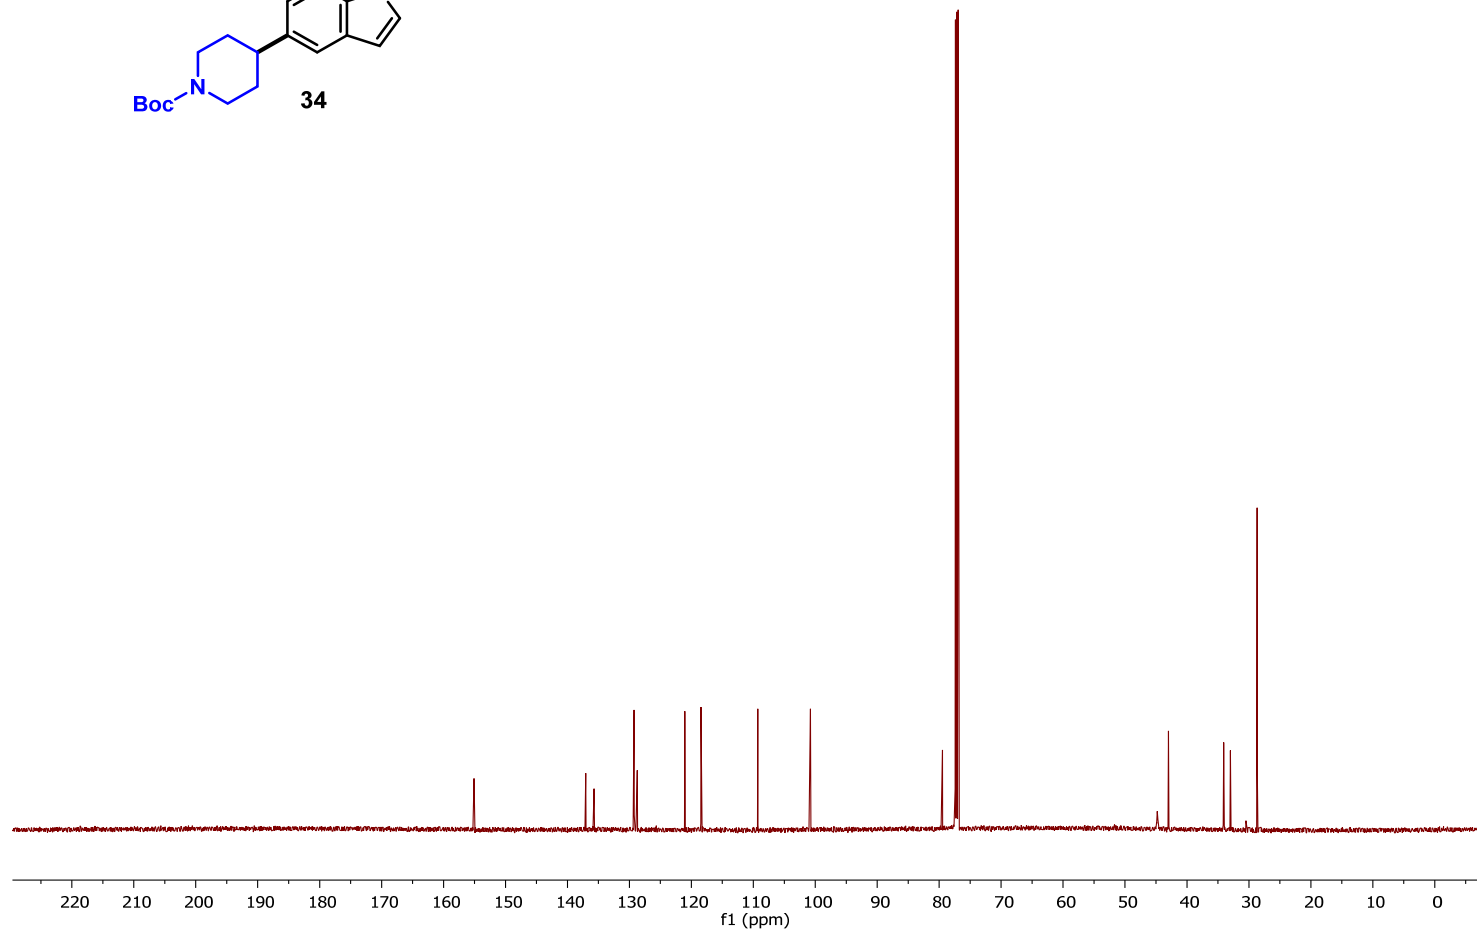

# Compound 35 <sup>1</sup>H NMR

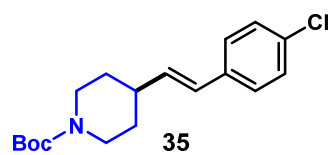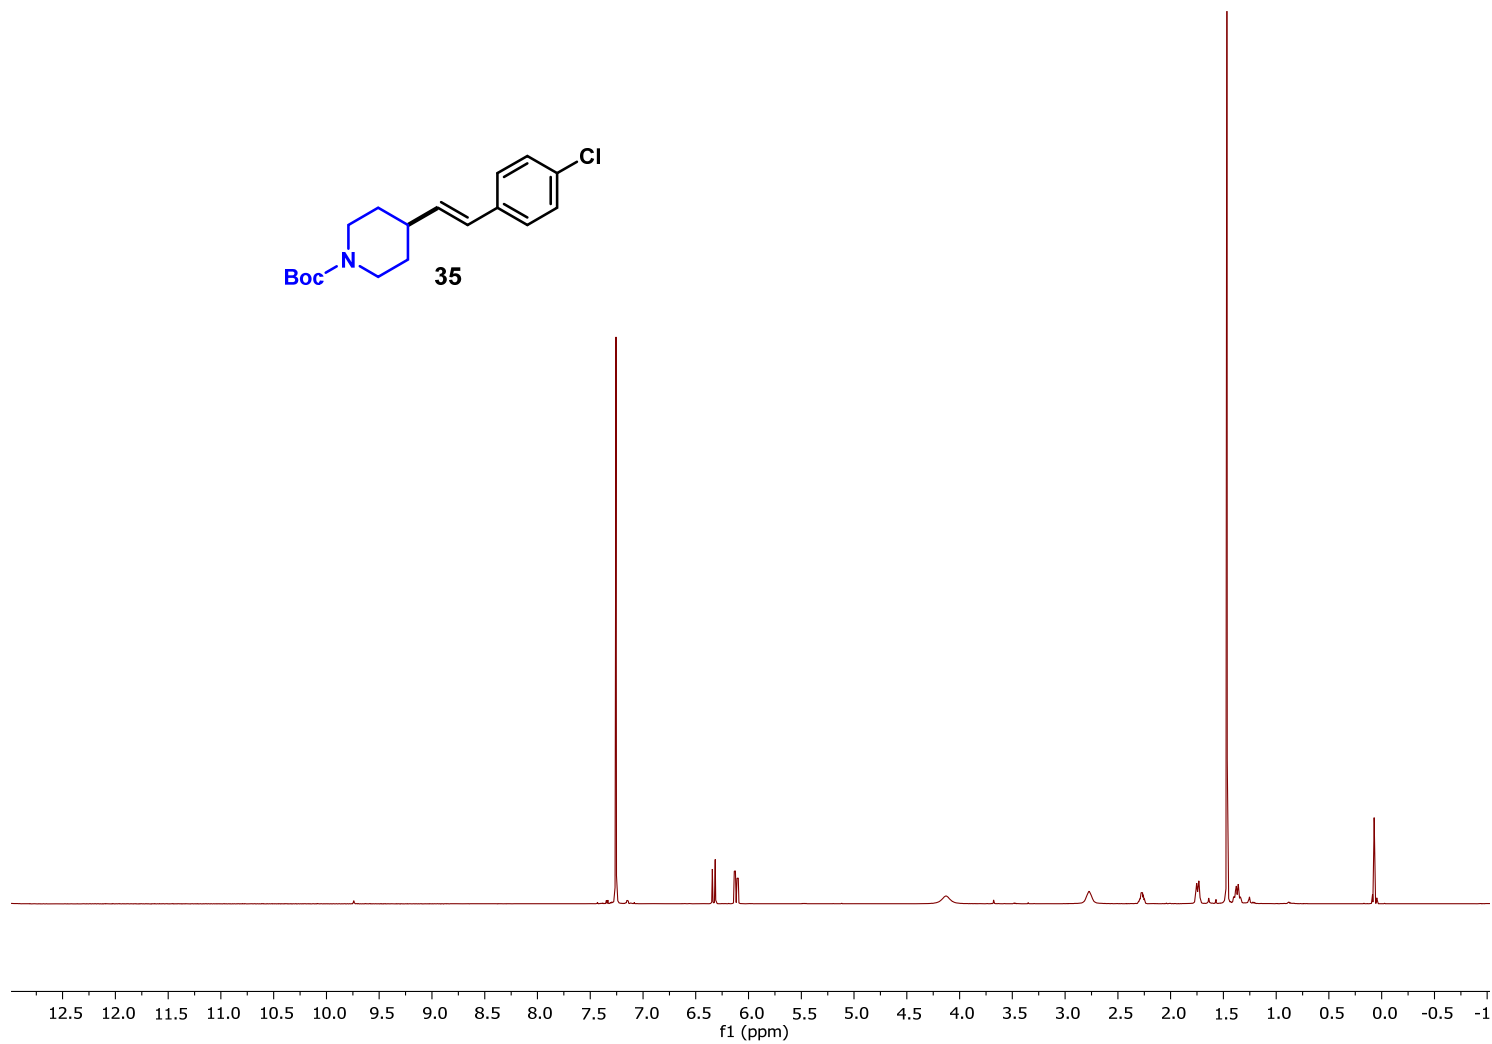

# Compound 35 <sup>13</sup>C NMR

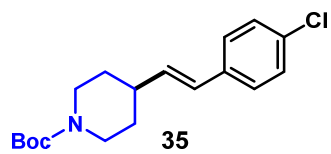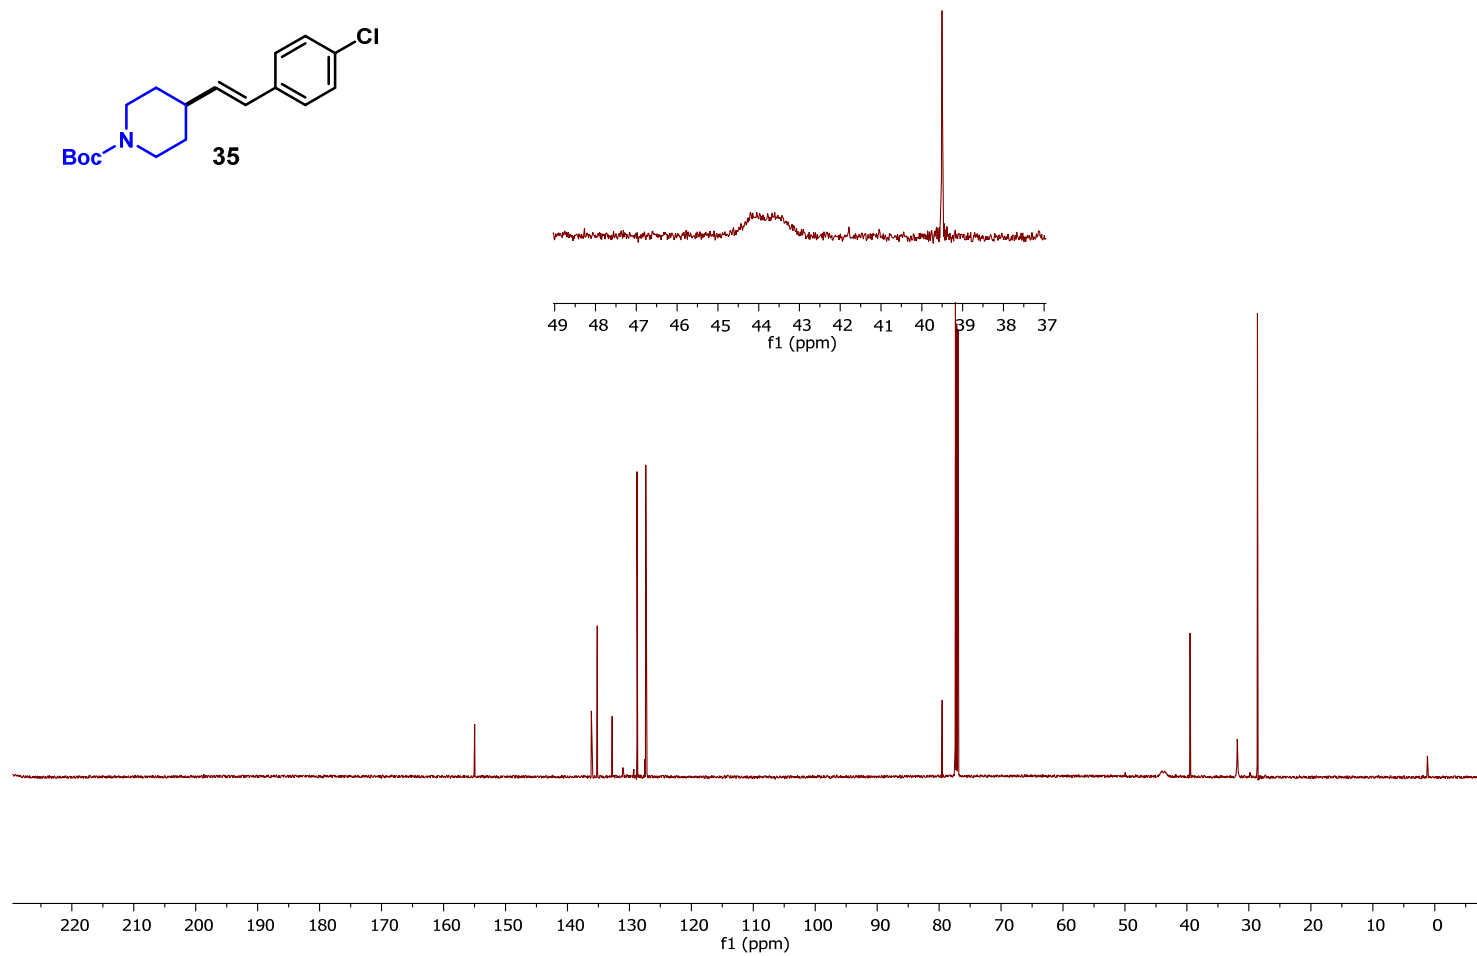

# Compound 35 HSQC

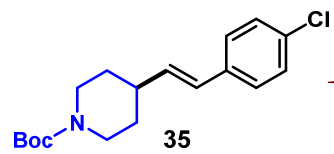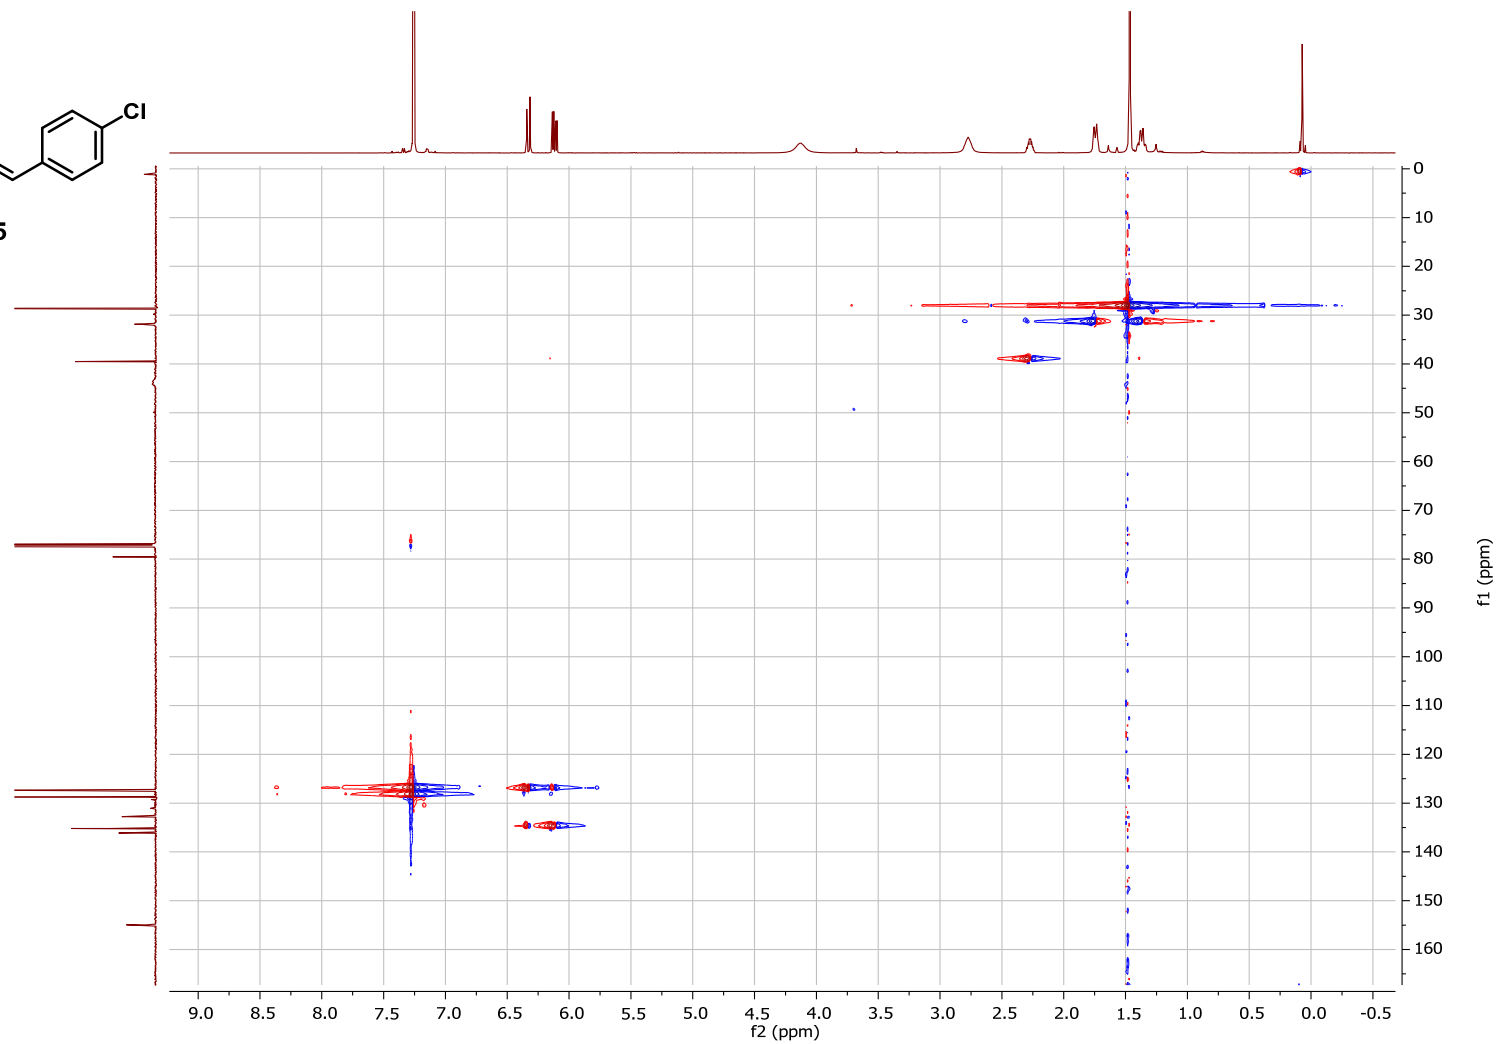

Compound 36 <sup>1</sup>H NMR

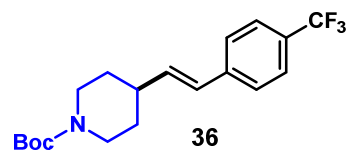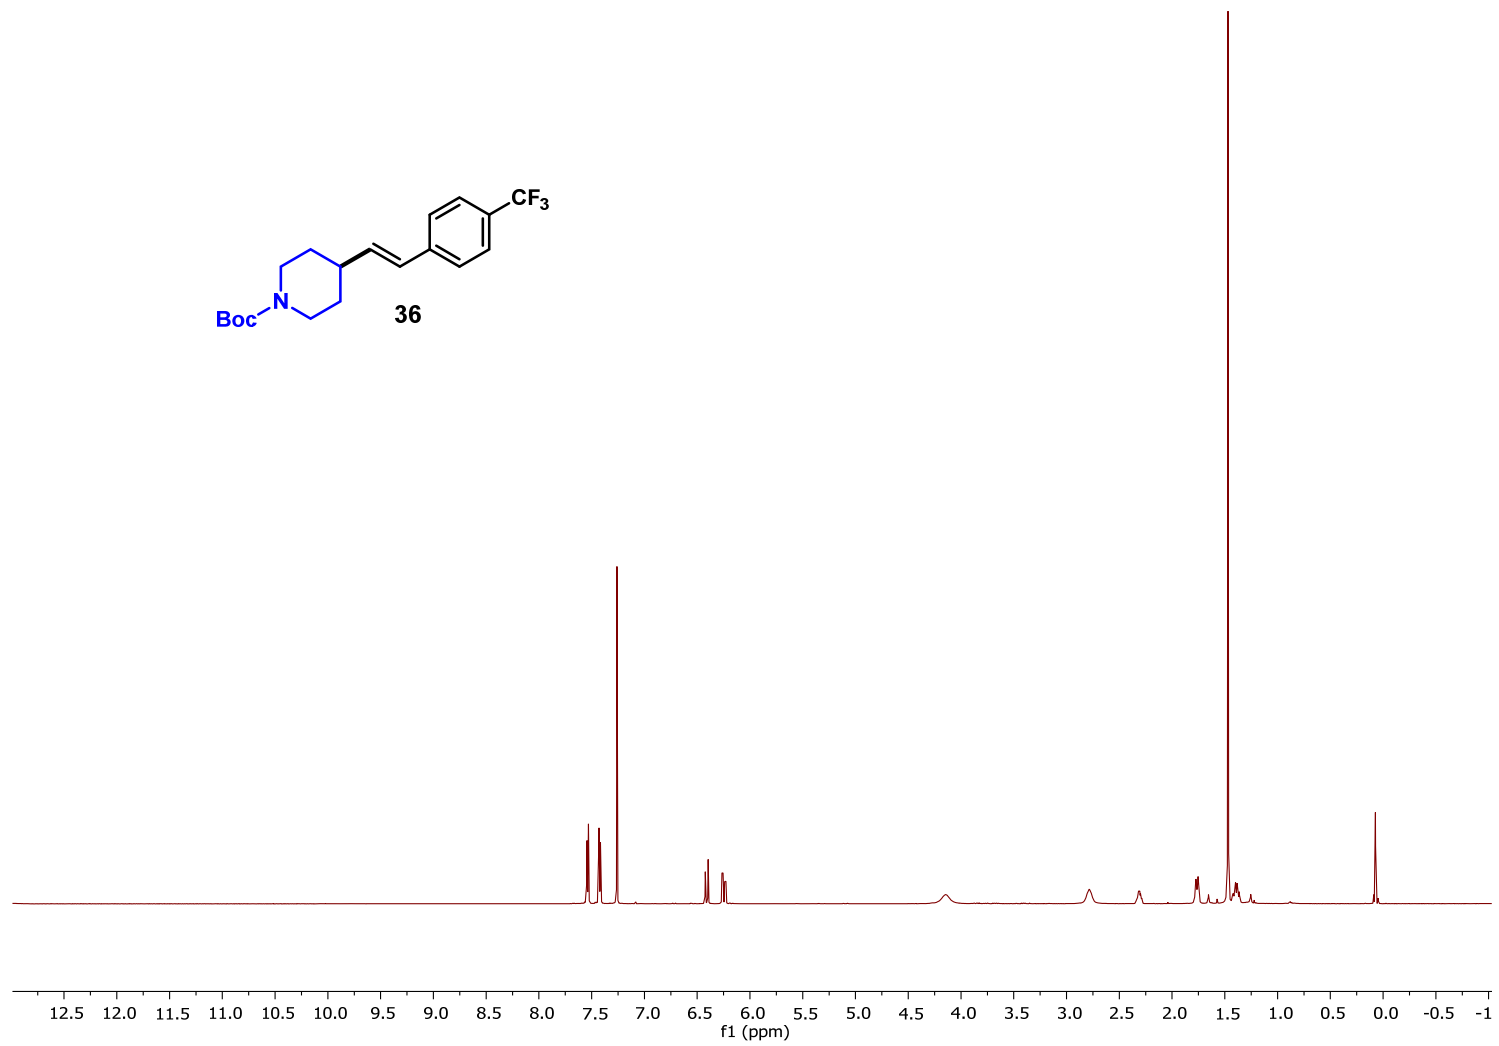

# Compound 36 <sup>13</sup>C NMR

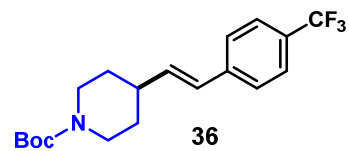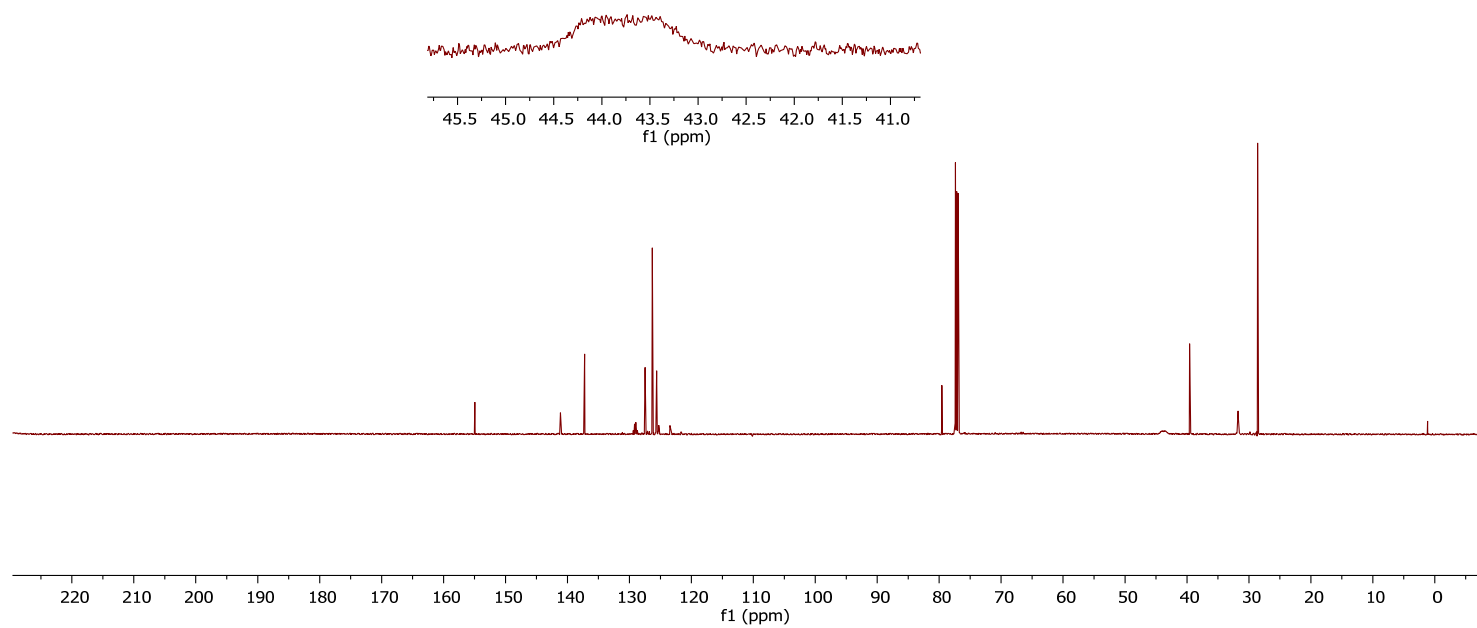

Compound 36  $^{19}\text{F}$  NMR

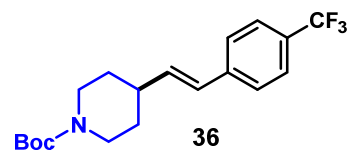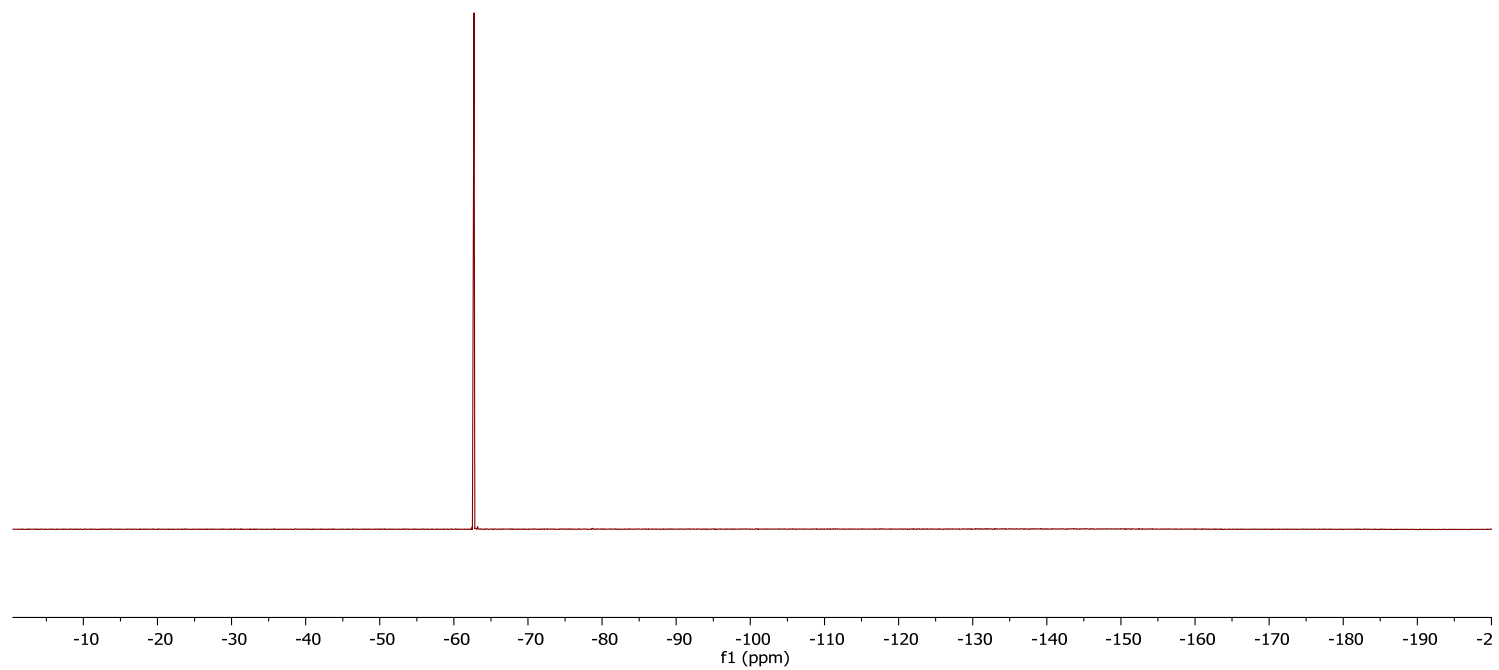

Compound 37  $^1\text{H}$  NMR

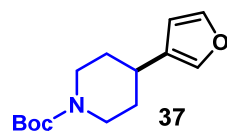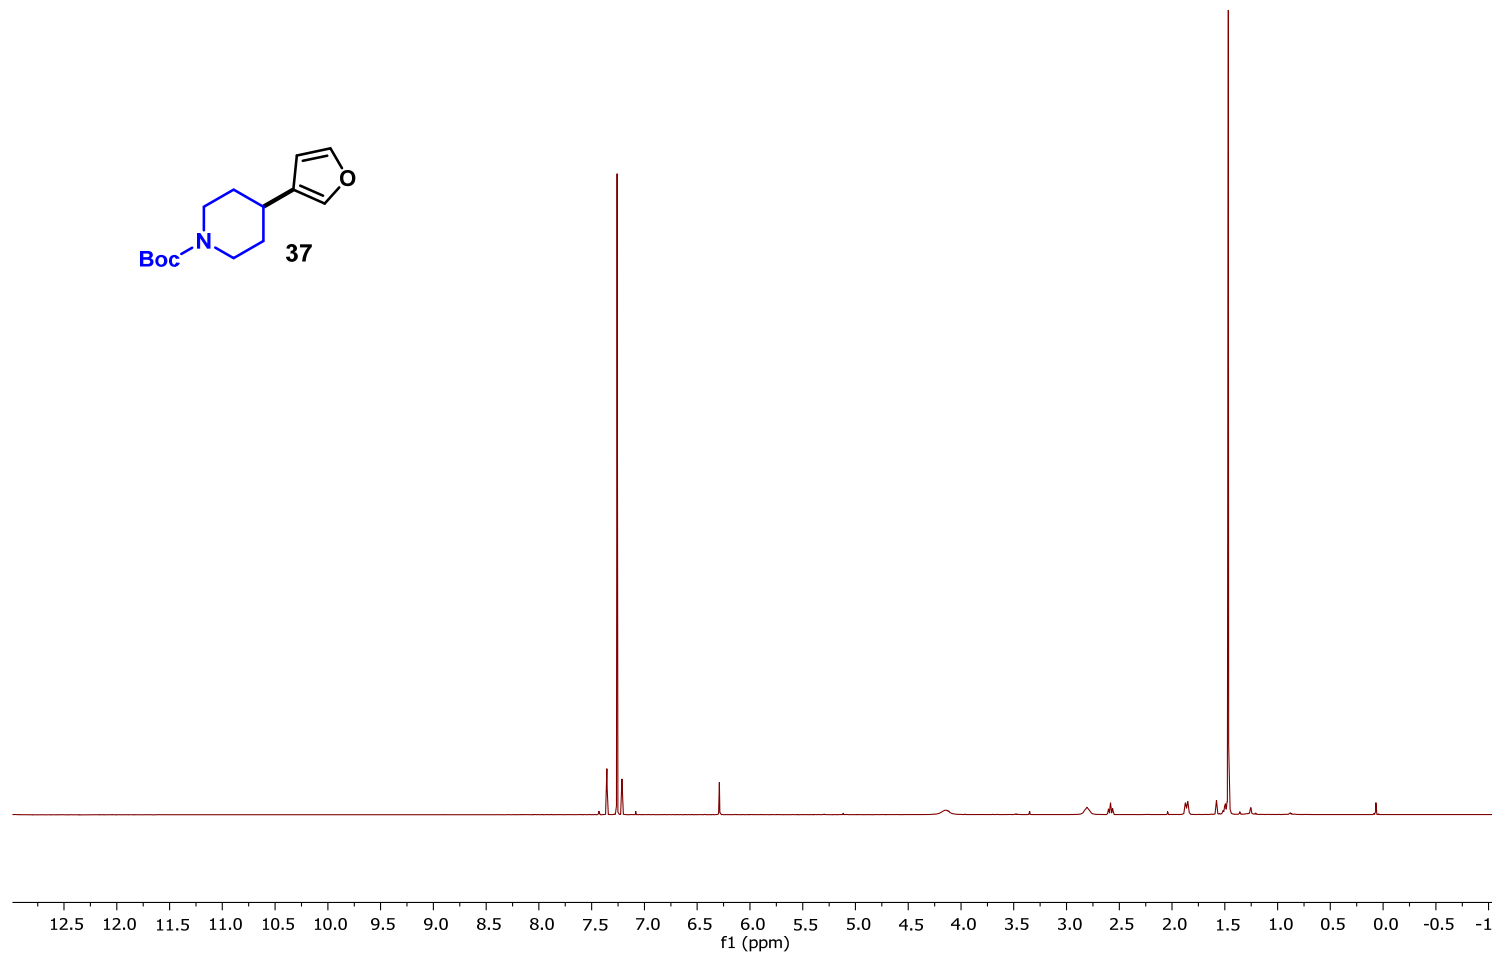



# Compound 37 $^{13}\text{C}$ NMR

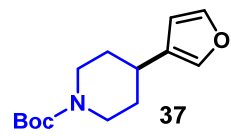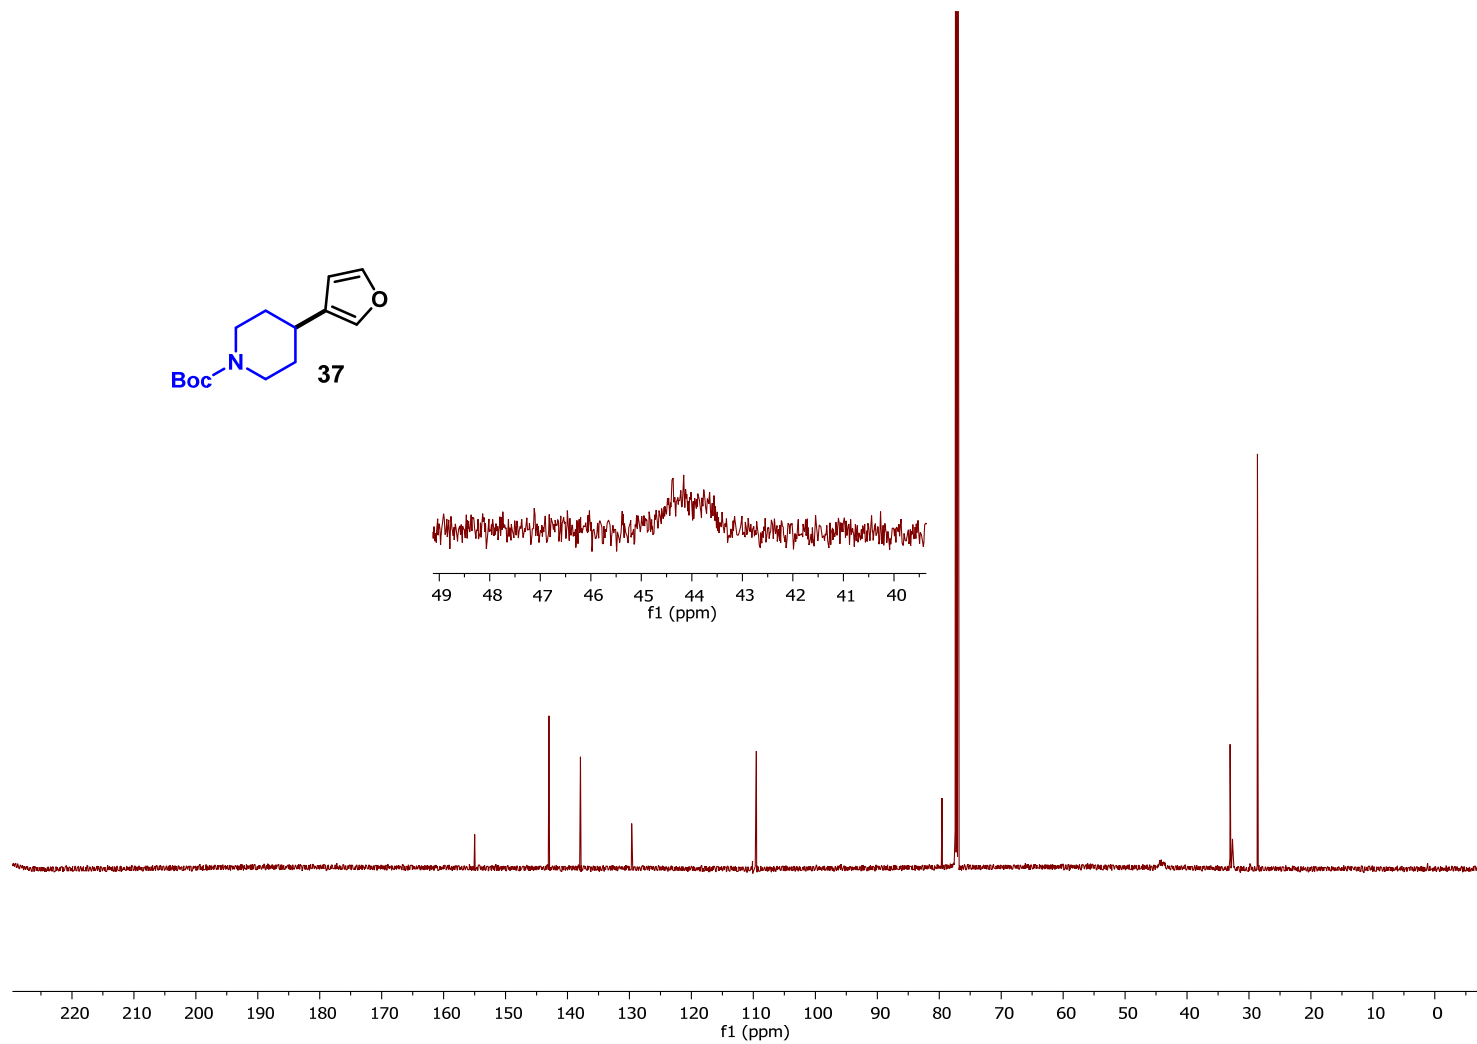

# Compound 38 <sup>1</sup>H NMR

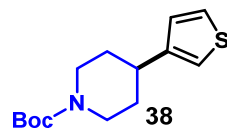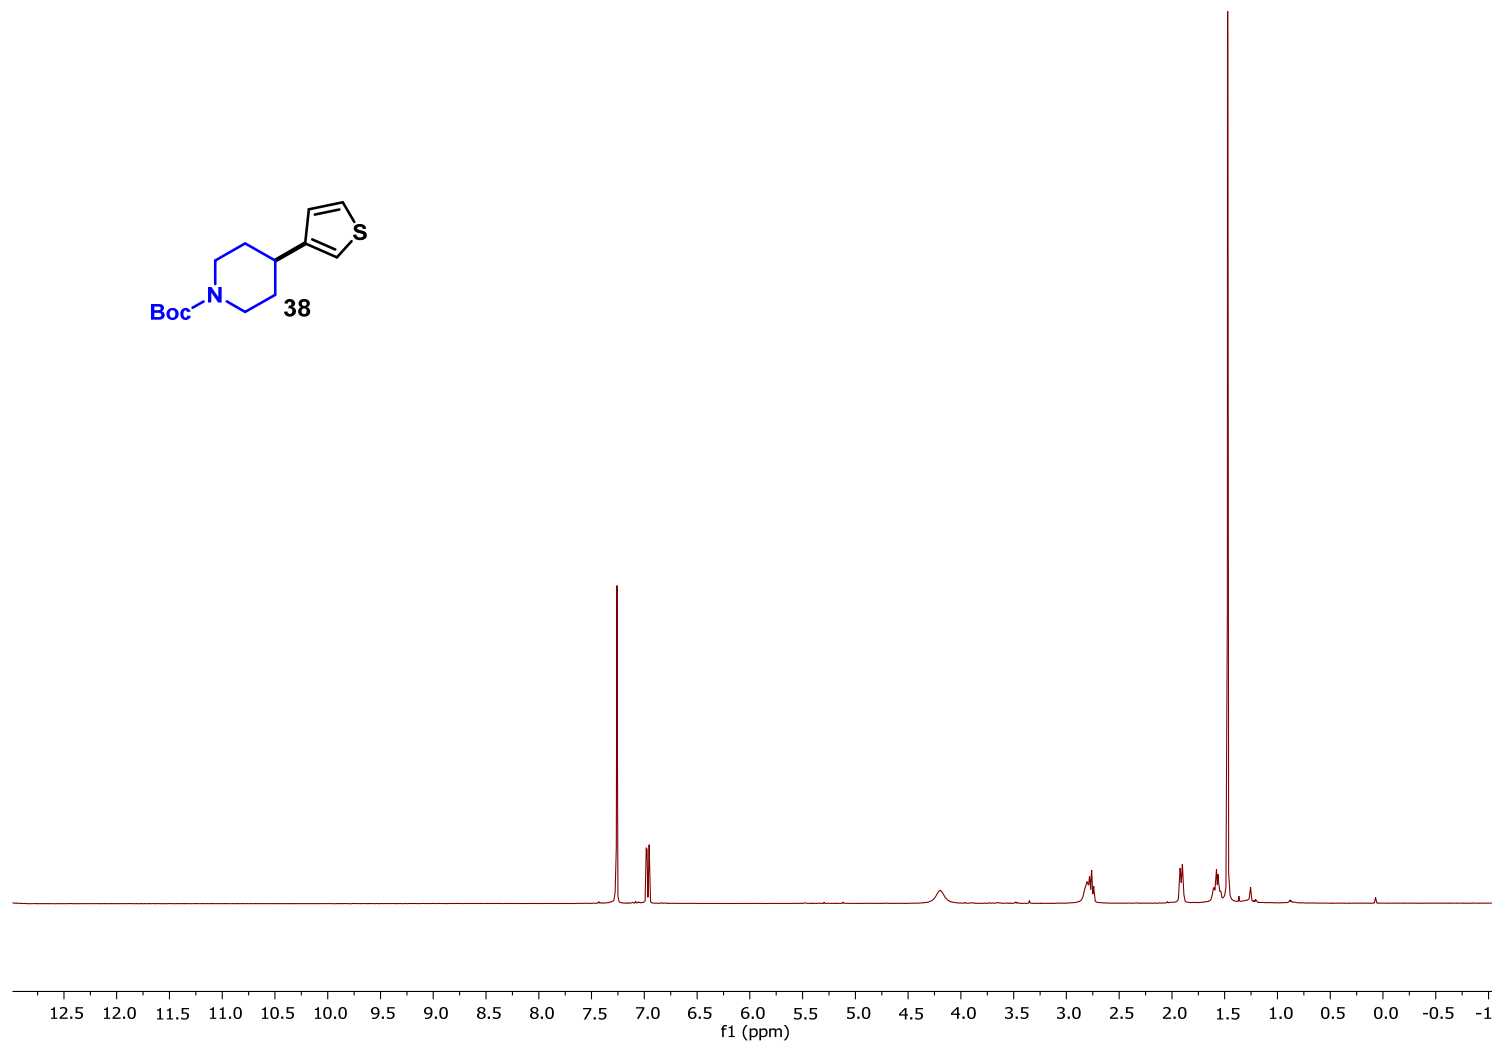

Compound 38  $^{13}\text{C}$  NMR

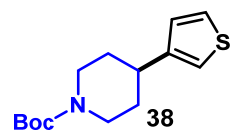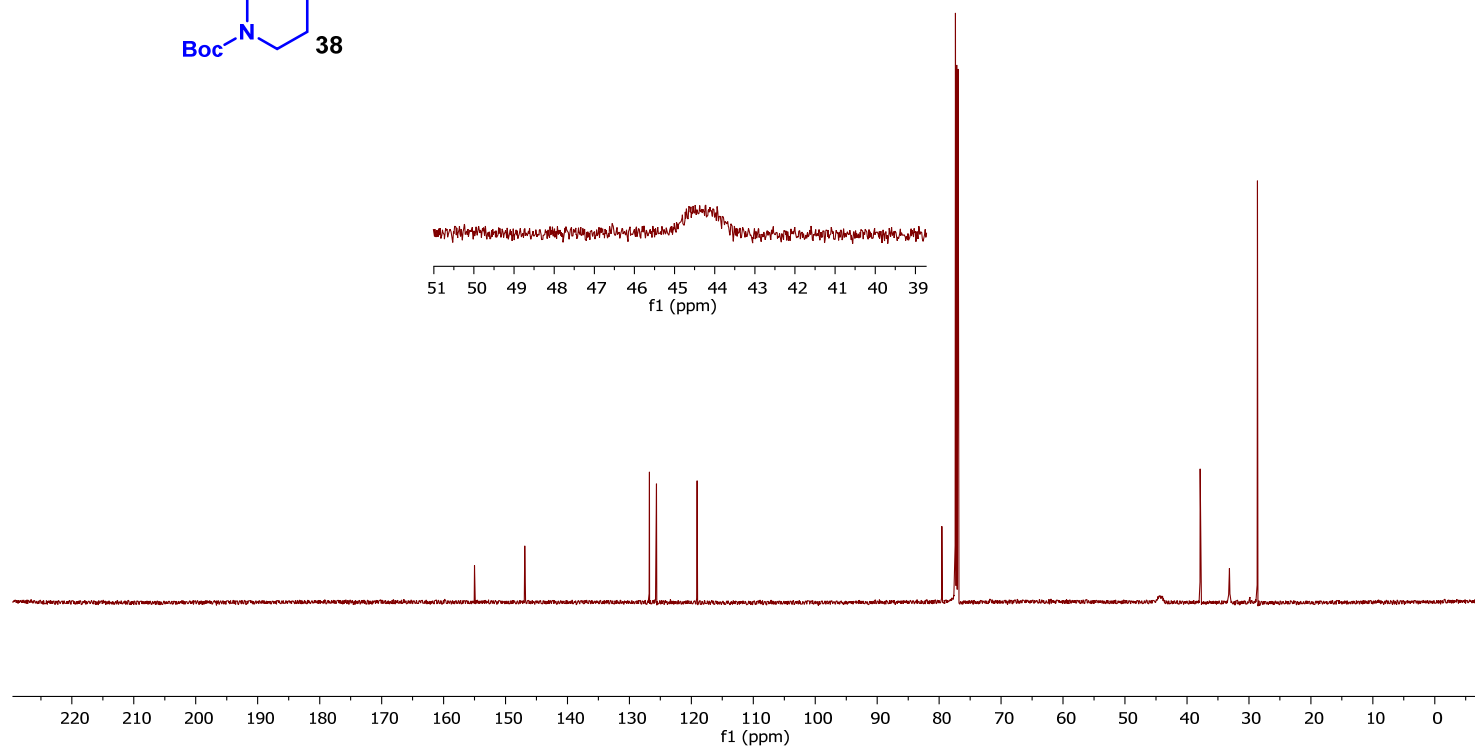

# Compound 39 <sup>1</sup>H NMR

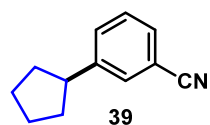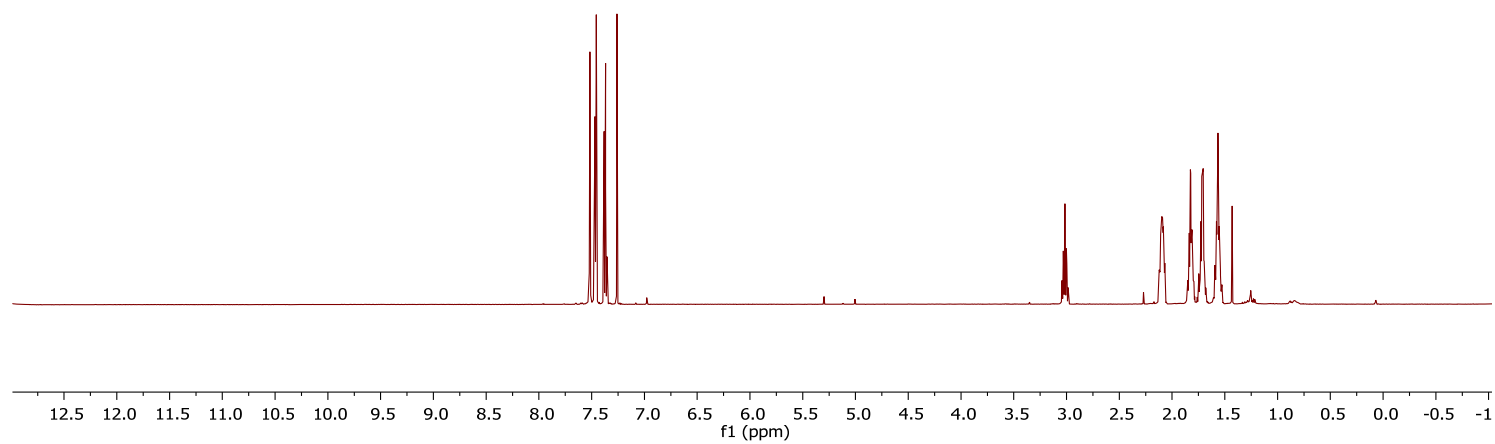

Compound 39  $^{13}\text{C}$  NMR

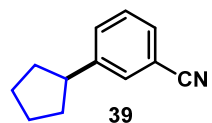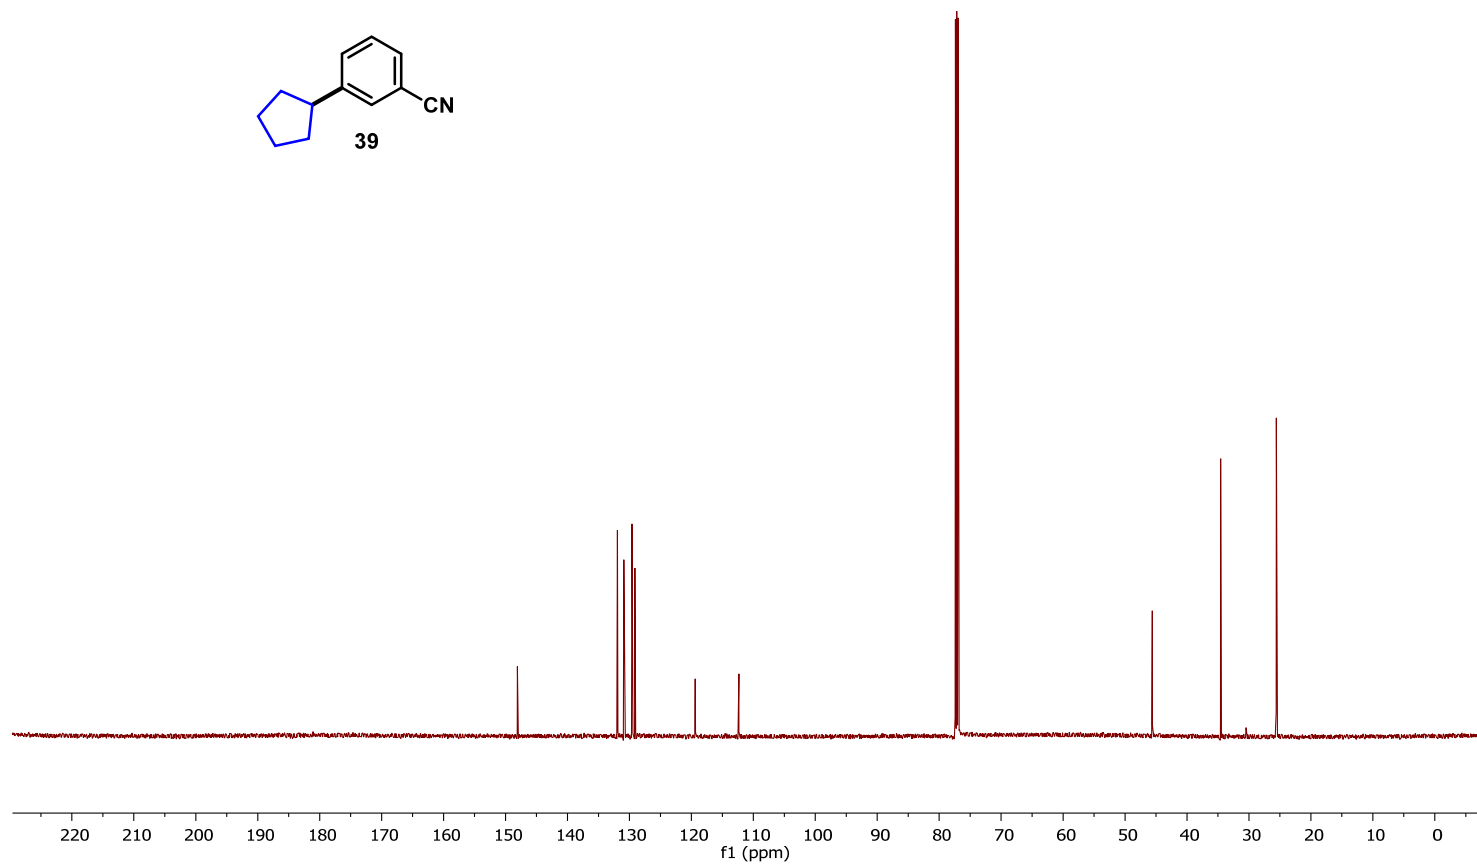

# Compound 40 $^1\text{H}$ NMR

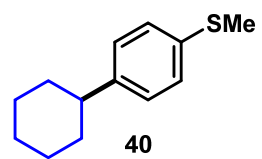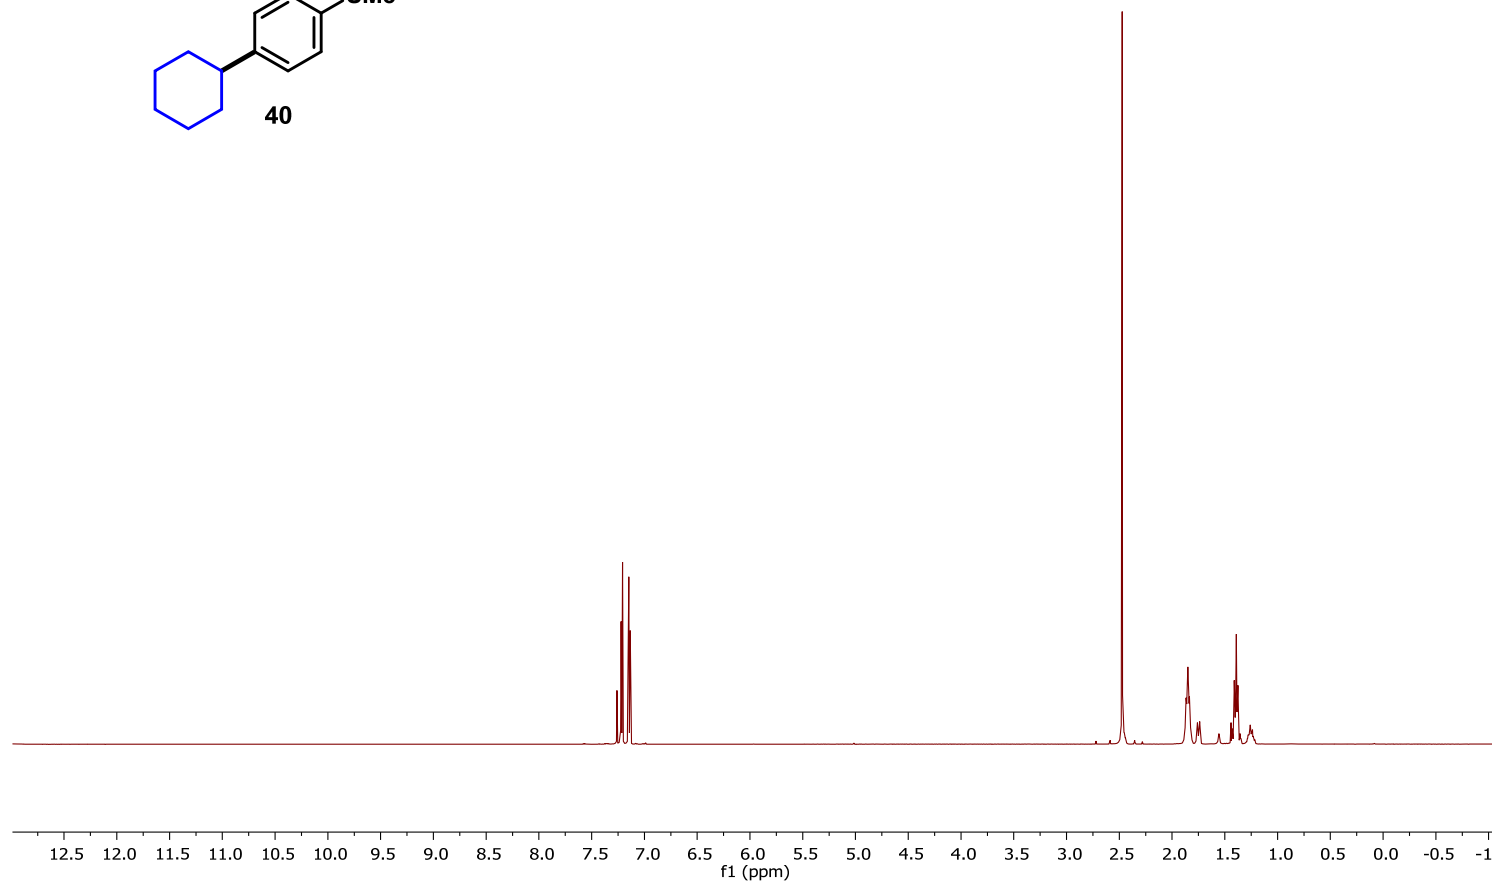

Compound 40  $^{13}\text{C}$  NMR

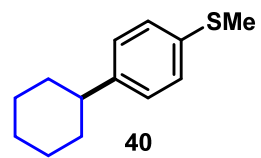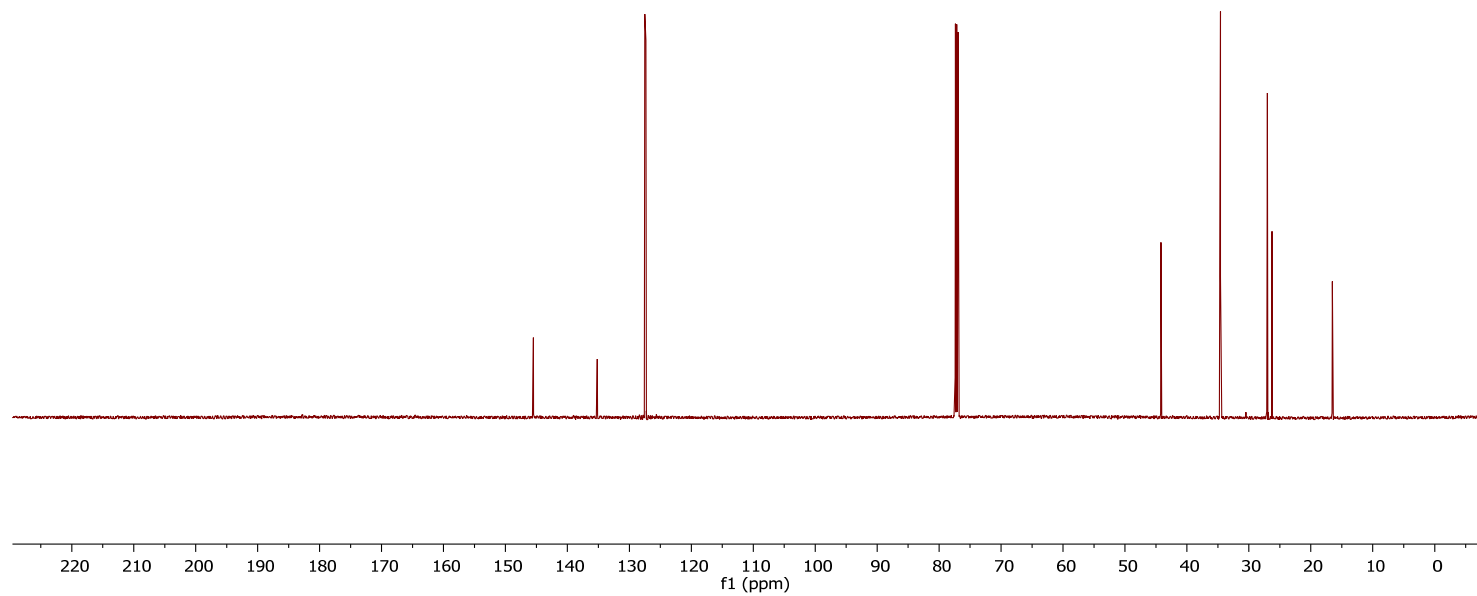

# Compound 41 <sup>1</sup>H NMR

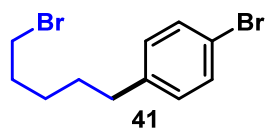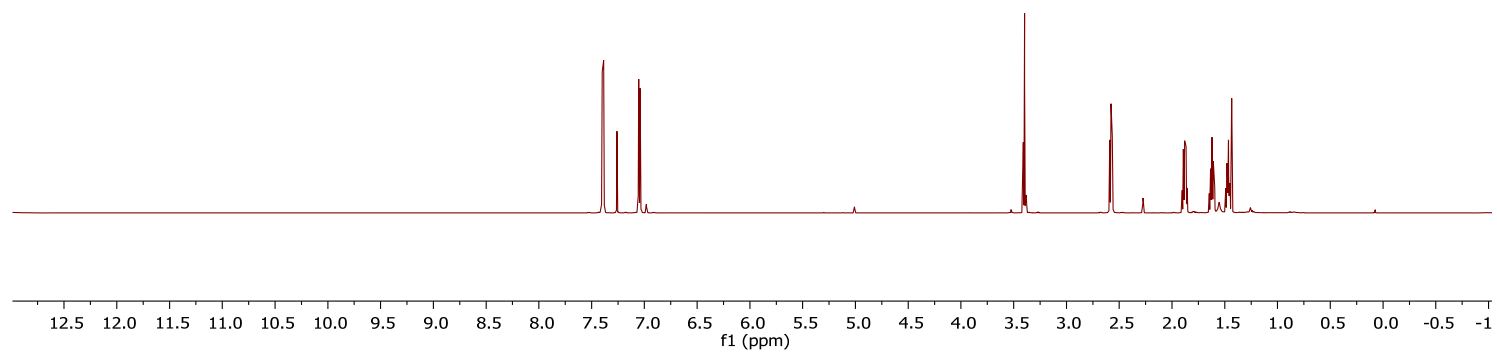



Compound 41  $^{13}\text{C}$  NMR

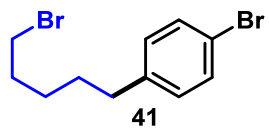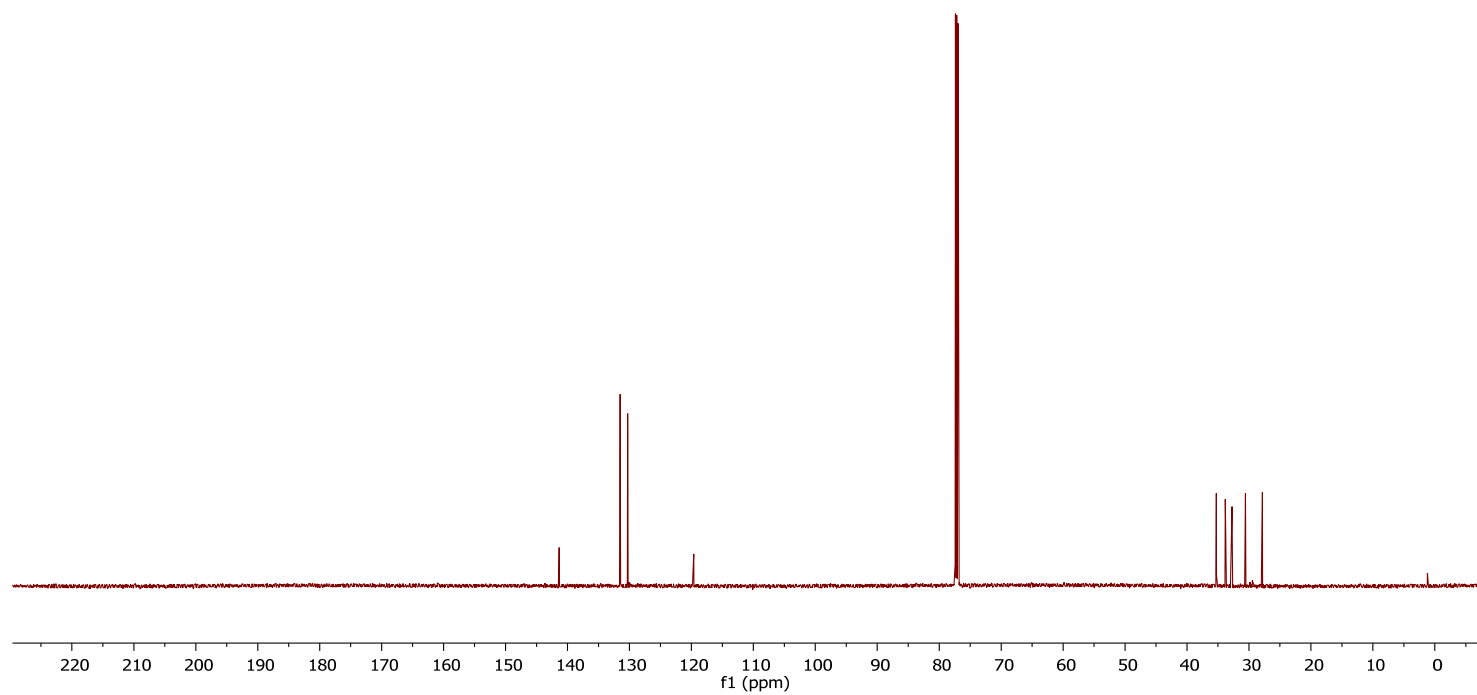

# Compound 44 <sup>1</sup>H NMR

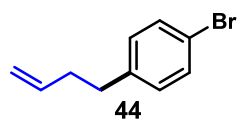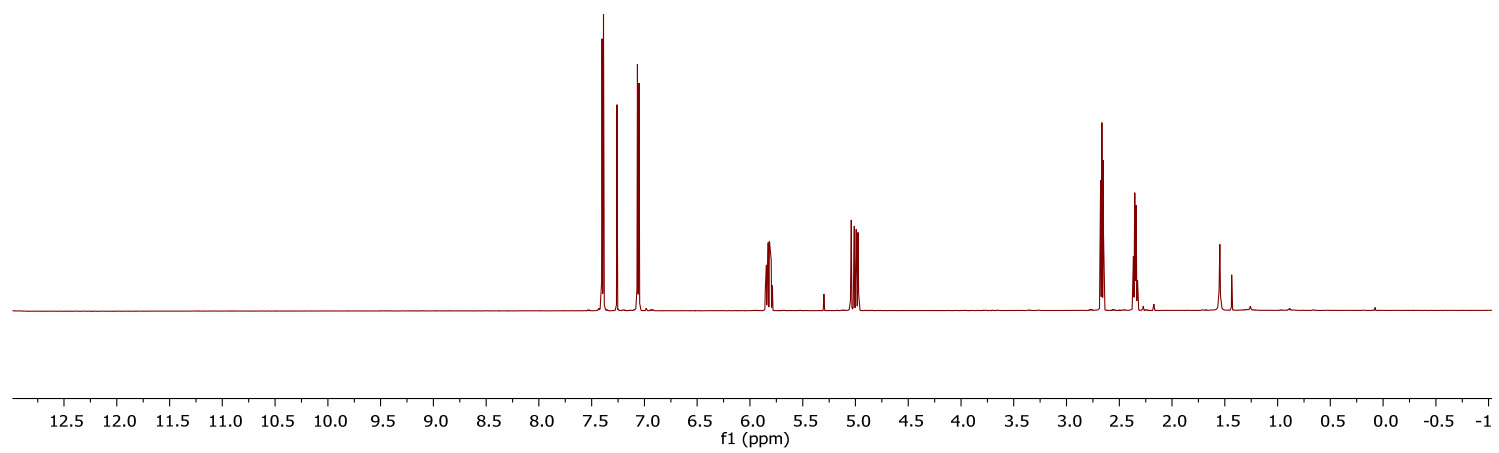

Compound 44  $^{13}\text{C}$  NMR

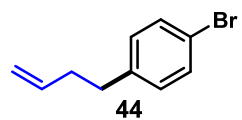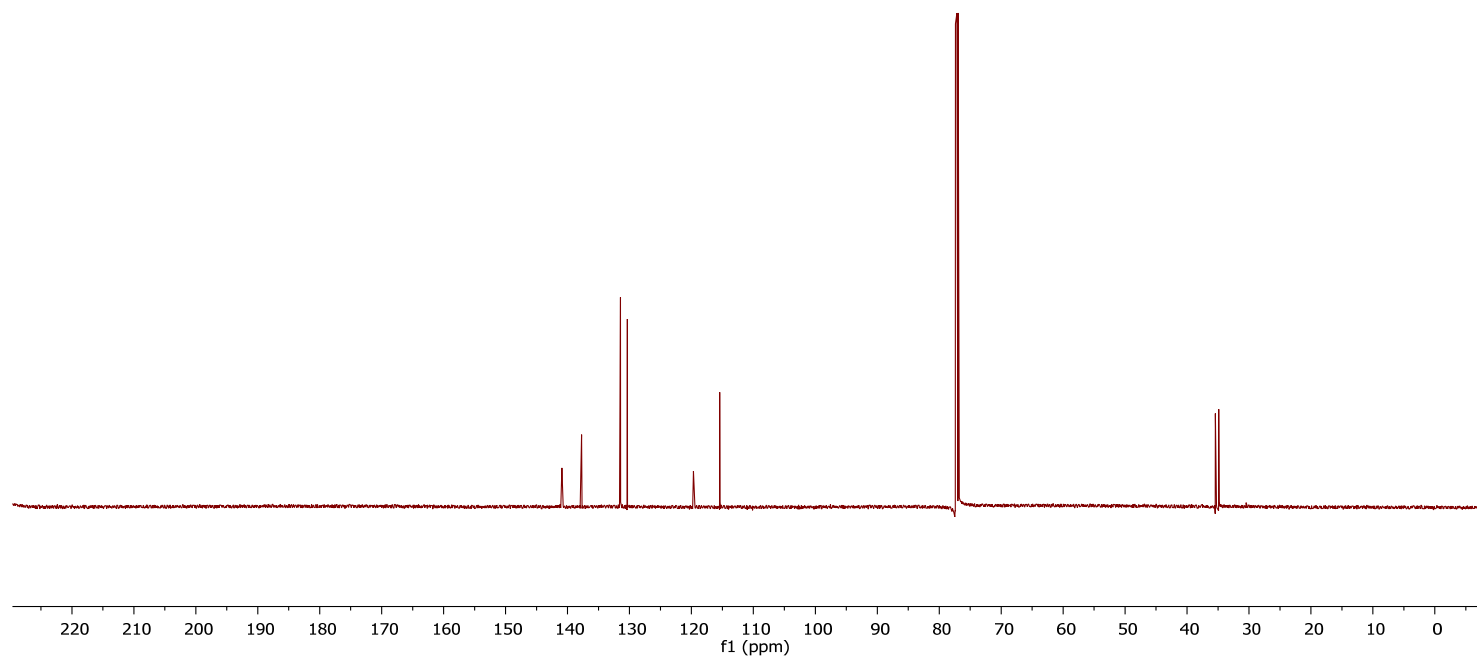

Supplement: NIHMS835881-supplement-Supporting_Information.pdf [file NIHMS835881-supplement-Supporting_Information.pdf]
